# Supplementary material
Source: PubMed Central journal article supplement (PMC6204120)

**Supplementary Table 1. List of genes comprising Cluster 1 from Figure 2.**

|            |
|------------|
| ISG15      |
| IFI44L     |
| IFI44      |
| TTF2       |
| FCGR1A     |
| HIST2H2AA4 |
| IFI16      |
| RGS1       |
| ANO7L1     |
| IFI6       |
| RNF19B     |
| GBP1       |
| GBP2       |
| GBP4       |
| CD58       |
| XCL2       |
| TNFSF4     |
| SNORA36B   |
| SRGN       |
| IFIT2      |
| IFIT3      |
| IFIT1      |
| EGR2       |
| PPA1       |
| RGS10      |
| IFITM1     |
| TRIM22     |
| MDK        |
| RARRES3    |
| BIRC3      |
| OR52E8     |
| AMBRA1     |
| UBE2L6     |
| SLC15A3    |
| UNC93B1    |
| CASP1      |
| KLRD1      |

|              |
|--------------|
| RASSF3       |
| OAS1         |
| OAS3         |
| OAS2         |
| TESPA1       |
| OASL         |
| LMO7DN-IT1   |
| EPST11       |
| IRF9         |
| IFI27        |
| WARS         |
| B2M          |
| TRIM69       |
| PML          |
| ISG20        |
| BCL2A1       |
| TNFRSF12A    |
| SOCS1        |
| XAF1         |
| CCL4         |
| IFI35        |
| KPNA2        |
| SYNGR2       |
| RNF213       |
| CCL3L3       |
| MIR924       |
| GNA15        |
| JUNB         |
| IFI30        |
| HCST         |
| ZFP36        |
| TYROBP       |
| RSAD2        |
| CCL20        |
| SP100        |
| NRIR         |
| CMPK2        |
| EIF2AK2      |
| LOC101927070 |

|              |
|--------------|
| NMI          |
| IFIH1        |
| STAT1        |
| SP110        |
| ZNF831       |
| DSN1         |
| SAMHD1       |
| ZNFX1        |
| HELZ2        |
| MX2          |
| MX1          |
| APOL6        |
| APOBEC3G     |
| TYMP         |
| ODF3B        |
| LOC105373098 |
| ECT2         |
| LINC00888    |
| RTP4         |
| SHISA5       |
| PLSCR1       |
| LAMP3        |
| RPL39L       |
| NCAPG        |
| MRPS18C      |
| HERC6        |
| HERC5        |
| TLR3         |
| CXCL9        |
| CXCL10       |
| CXCL11       |
| DDX60        |
| LINC01667    |
| C5orf56      |
| SMAD5-AS1    |
| SMIM13       |
| CD83         |
| HIST1H2BF    |
| HIST1H2AG    |

|              |
|--------------|
| OR2B6        |
| HLA-F        |
| NA           |
| HLA-L        |
| PSMB8-AS1    |
| CENPW        |
| HIST1H3B     |
| HIST1H3D     |
| HIST1H3J     |
| TAP1         |
| ETV7         |
| TREM2        |
| NFKBIE       |
| DYNLT1       |
| TRIM31       |
| HLA-E        |
| HCG26        |
| PSMB9        |
| UBD          |
| HLA-G        |
| HLA-A        |
| TAP2         |
| HCP5         |
| HLA-C        |
| ORAI2        |
| ATP6V1F      |
| NT5C3A       |
| SAMD9        |
| SAMD9L       |
| PARP12       |
| MSRA         |
| MIR3926-2    |
| IDO1         |
| LOC105375753 |
| TDRD7        |
| LOC105376208 |
| DDX58        |
| LOC105373318 |
| GBP1P1       |

|              |
|--------------|
| LOC100288175 |
| LGALS9       |
| LINC00487    |
| MIR4435-2HG  |
| TRANK1       |

**Supplementary Table 2: List of 408 differentially expressed genes comparing week2/4 on treatment liver biopsy to baseline liver biopsy**

| <b>SYMBOL</b> | <b>GENE</b>                                                                | <b>Fold Change</b> | <b>P value</b> |
|---------------|----------------------------------------------------------------------------|--------------------|----------------|
| ISG15         | ISG15 ubiquitin-like modifier                                              | -4.084118186       | 3.57E-09       |
| IFITM1        | interferon induced transmembrane protein 1                                 | -1.789282969       | 3.60E-08       |
| OASL          | 2'-5'-oligoadenylate synthetase like                                       | -4.538084295       | 6.29E-08       |
| ODF3B         | outer dense fiber of sperm tails 3B                                        | -1.499396384       | 3.84E-07       |
| LINC00487     | long intergenic non-protein coding RNA 487                                 | -2.866622293       | 8.14E-07       |
| CMPK2         | cytidine/uridine monophosphate kinase 2                                    | -2.91695621        | 1.05E-06       |
| HERC6         | HECT and RLD domain containing E3 ubiquitin protein ligase family member 6 | -2.87404025        | 1.47E-06       |
| CXCL11        | C-X-C motif chemokine ligand 11                                            | -2.790076471       | 1.83E-06       |
| MX1           | MX dynamin like GTPase 1                                                   | -3.433429014       | 2.62E-06       |
| NRIR          | negative regulator of interferon response (non-protein coding)             | -2.18991233        | 2.92E-06       |
| EPST11        | epithelial stromal interaction 1 (breast)                                  | -2.599603995       | 3.14E-06       |
| DDX60         | DEXD/H-box helicase 60                                                     | -2.936424136       | 3.42E-06       |
| IFI35         | interferon induced protein 35                                              | -1.635350735       | 4.83E-06       |
| CXCL10        | C-X-C motif chemokine ligand 10                                            | -4.782268615       | 5.87E-06       |
| OAS3          | 2'-5'-oligoadenylate synthetase 3                                          | -2.861678472       | 9.71E-06       |
| SOCS1         | suppressor of cytokine signaling 1                                         | -1.481346731       | 1.28E-05       |
| STAT1         | signal transducer and activator of transcription 1                         | -2.206781852       | 1.33E-05       |
| IFI44L        | interferon induced protein 44 like                                         | -3.865389456       | 1.40E-05       |
| RTP4          | receptor transporter protein 4                                             | -2.259017307       | 2.54E-05       |
| TSSK2         | testis specific serine kinase 2                                            | 1.346865488        | 2.85E-05       |
| CMTM4         | CKLF like MARVEL transmembrane domain containing 4                         | 1.541485445        | 2.86E-05       |
| IFI6          | interferon alpha inducible protein 6                                       | -4.380653218       | 3.80E-05       |
| PLSCR1        | phospholipid scramblase 1                                                  | -1.587591103       | 3.84E-05       |
| UNC119B       | unc-119 lipid binding chaperone B                                          | 1.390173092        | 3.96E-05       |
| TAP2          | transporter 2, ATP binding cassette subfamily B member                     | -1.318580458       | 4.62E-05       |
| HERC5         | HECT and RLD domain containing E3 ubiquitin protein ligase 5               | -2.599314365       | 5.83E-05       |
| PPA1          | pyrophosphatase (inorganic) 1                                              | -1.400670164       | 5.84E-05       |
| MDK           | midkine (neurite growth-promoting factor 2)                                | -1.657301129       | 6.11E-05       |
| OAS2          | 2'-5'-oligoadenylate synthetase 2                                          | -2.848102776       | 7.98E-05       |
| UBE2L6        | ubiquitin conjugating enzyme E2 L6                                         | -1.641916274       | 8.21E-05       |
| TRIM69        | tripartite motif containing 69                                             | -1.329986293       | 8.83E-05       |
| IFIT3         | interferon induced protein with tetratricopeptide repeats 3                | -2.409943325       | 8.95E-05       |

|              |                                                      |              |             |
|--------------|------------------------------------------------------|--------------|-------------|
| GPC5-AS2     | GPC5 antisense RNA 2                                 | 1.248301794  | 0.000107112 |
| MIR320E      | microRNA 320e                                        | -1.49041472  | 0.000109682 |
| HIST1H3D     | histone cluster 1 H3 family member d                 | -1.402539674 | 0.000114783 |
| LOC105373318 | uncharacterized LOC105373318                         | -1.480000675 | 0.00011553  |
| B2M          | beta-2-microglobulin                                 | -1.251693724 | 0.000124783 |
| SLC15A3      | solute carrier family 15 member 3                    | -1.467205042 | 0.000129326 |
| RSAD2        | radical S-adenosyl methionine domain containing 2    | -2.534805615 | 0.000130468 |
| HLA-G        | major histocompatibility complex, class I, G         | -1.276770294 | 0.000131691 |
| PSMB9        | proteasome subunit beta 9                            | -1.349720303 | 0.000137667 |
| IFI44        | interferon induced protein 44                        | -2.508178277 | 0.000137843 |
| LOC101927942 | uncharacterized LOC101927942                         | 1.633982299  | 0.000147473 |
| IQSEC1       | IQ motif and Sec7 domain 1                           | 1.249858695  | 0.000153783 |
| FCGR1A       | Fc fragment of IgG receptor Ia                       | -1.77772631  | 0.000155293 |
| WBSCR27      | Williams Beuren syndrome chromosome region 27        | 1.2179421    | 0.00018273  |
| LAMP3        | lysosomal associated membrane protein 3              | -2.15734409  | 0.000188927 |
| IFI27        | interferon alpha inducible protein 27                | -1.903885042 | 0.000188962 |
| FAM149A      | family with sequence similarity 149 member A         | 1.299004526  | 0.000189032 |
| LINC01534    | long intergenic non-protein coding RNA 1534          | 1.378072946  | 0.000192563 |
| IFI30        | IFI30, lysosomal thiol reductase                     | -1.429611907 | 0.000201026 |
| CXCL9        | C-X-C motif chemokine ligand 9                       | -2.499027019 | 0.000202519 |
| SP110        | SP110 nuclear body protein                           | -1.473734731 | 0.00020986  |
| DDX58        | DEXD/H-box helicase 58                               | -1.755213616 | 0.000223119 |
| HIST1H2BF    | histone cluster 1 H2B family member f                | -1.633757785 | 0.000234856 |
| HCP5         | HLA complex P5 (non-protein coding)                  | -1.813193437 | 0.000235264 |
| PARP12       | poly(ADP-ribose) polymerase family member 12         | -1.602124803 | 0.000249442 |
| ESR1         | estrogen receptor 1                                  | 1.406039973  | 0.000257248 |
| ISM1         | isthmin 1                                            | 1.391467238  | 0.000276503 |
| OAS1         | 2'-5'-oligoadenylate synthetase 1                    | -2.116599739 | 0.000276514 |
| ARSD         | arylsulfatase D                                      | 1.45719898   | 0.000281214 |
| ISG20        | interferon stimulated exonuclease gene 20            | -1.589310188 | 0.000342715 |
| WARS         | tryptophanyl-tRNA synthetase                         | -1.256789751 | 0.000343771 |
| CDK14        | cyclin dependent kinase 14                           | 1.267986803  | 0.000353517 |
| EEF2         | eukaryotic translation elongation factor 2           | 1.283595477  | 0.000366083 |
| RNF19B       | ring finger protein 19B                              | -1.218425966 | 0.000402113 |
| EIF3L        | eukaryotic translation initiation factor 3 subunit L | 1.25129337   | 0.000409995 |
| SLC46A1      | solute carrier family 46 member 1                    | 1.437252517  | 0.000410035 |
| IRF9         | interferon regulatory factor 9                       | -1.550630683 | 0.000412971 |

|              |                                                                                            |              |             |
|--------------|--------------------------------------------------------------------------------------------|--------------|-------------|
| KIF12        | kinesin family member 12                                                                   | 1.592543631  | 0.000425764 |
| GBP1P1       | guanylate binding protein 1<br>pseudogene 1                                                | -1.393890072 | 0.000427544 |
| ALDH2        | aldehyde dehydrogenase 2 family<br>(mitochondrial)                                         | 1.301563841  | 0.0004369   |
| HDLBP        | high density lipoprotein binding<br>protein                                                | 1.204505042  | 0.000466716 |
| EIF4B        | eukaryotic translation initiation factor<br>4B                                             | 1.41354455   | 0.000468452 |
| RNASE13      | ribonuclease A family member 13<br>(inactive)                                              | 1.309608536  | 0.000491023 |
| LOC105375753 | uncharacterized LOC105375753                                                               | -1.257477152 | 0.000505051 |
| TDRD7        | tudor domain containing 7                                                                  | -1.459946351 | 0.000531538 |
| SPATA33      | spermatogenesis associated 33                                                              | 1.326668112  | 0.00053207  |
| MIR924       | microRNA 924                                                                               | -1.406071033 | 0.00054886  |
| CERK         | ceramide kinase                                                                            | 1.303698557  | 0.000553821 |
| TAP1         | transporter 1, ATP binding cassette<br>subfamily B member                                  | -1.514233832 | 0.00056765  |
| UBE4B        | ubiquitination factor E4B                                                                  | 1.253367072  | 0.000587016 |
| LOC101927070 | uncharacterized LOC101927070                                                               | -1.260497734 | 0.000591263 |
| IFI27L1      | interferon alpha inducible protein 27<br>like 1                                            | -1.322781726 | 0.000600939 |
| CENPW        | centromere protein W                                                                       | -1.407574923 | 0.000617066 |
| NMI          | N-myc and STAT interactor                                                                  | -1.409033684 | 0.000650526 |
| DANCR        | differentiation antagonizing non-<br>protein coding RNA                                    | 1.350322818  | 0.000717876 |
| SNRPN        | small nuclear ribonucleoprotein<br>polypeptide N                                           | 1.654522647  | 0.000719874 |
| IFIT1        | interferon induced protein with<br>tetratricopeptide repeats 1                             | -2.328918851 | 0.000741899 |
| TRIM22       | tripartite motif containing 22                                                             | -1.49562576  | 0.000768763 |
| NMNAT1       | nicotinamide nucleotide<br>adenyltransferase 1                                             | 1.336008166  | 0.000806324 |
| DYNLT1       | dynein light chain Tctex-type 1                                                            | -1.324415449 | 0.000809257 |
| KIR2DL3      | killer cell immunoglobulin like<br>receptor, two Ig domains and long<br>cytoplasmic tail 3 | -1.240001076 | 0.000810983 |
| TARP         | TCR gamma alternate reading frame<br>protein                                               | -1.428842348 | 0.000812516 |
| OR4C15       | olfactory receptor family 4 subfamily<br>C member 15                                       | -1.257084846 | 0.00084982  |
| TENM1        | teneurin transmembrane protein 1                                                           | 1.585773066  | 0.000851129 |
| IFI16        | interferon gamma inducible protein<br>16                                                   | -1.451595036 | 0.00085949  |
| IFIT2        | interferon induced protein with<br>tetratricopeptide repeats 2                             | -1.932594154 | 0.000881979 |
| TYMP         | thymidine phosphorylase                                                                    | -1.252558969 | 0.0009105   |
| HIST1H3B     | histone cluster 1 H3 family member b                                                       | -1.21843228  | 0.000940249 |
| HOGA1        | 4-hydroxy-2-oxoglutarate aldolase 1                                                        | 1.511972579  | 0.000948252 |



|              |                                                                            |              |             |
|--------------|----------------------------------------------------------------------------|--------------|-------------|
| LOC105374177 | uncharacterized LOC105374177                                               | 1.499613721  | 0.000959977 |
| ETV7         | ETS variant 7                                                              | -1.488907792 | 0.000973949 |
| ZNRF3-AS1    | ZNRF3 antisense RNA 1                                                      | 1.264252585  | 0.000991298 |
| C12orf43     | chromosome 12 open reading frame 43                                        | 1.213964114  | 0.00099694  |
| SP100        | SP100 nuclear antigen                                                      | -1.311904246 | 0.001006411 |
| PML          | promyelocytic leukemia                                                     | -1.29205157  | 0.001015788 |
| DRC3         | dynein regulatory complex subunit 3                                        | 1.203884744  | 0.001060388 |
| MAVS         | mitochondrial antiviral signaling protein                                  | 1.228603568  | 0.001072166 |
| MIR3689E     | microRNA 3689e                                                             | 1.95326426   | 0.00108346  |
| SMAD5-AS1    | SMAD5 antisense RNA 1                                                      | -1.358138068 | 0.001098434 |
| BCL2A1       | BCL2 related protein A1                                                    | -1.537452439 | 0.001099632 |
| SNORD116-11  | small nucleolar RNA, C/D box 116-11                                        | -1.293026999 | 0.001107458 |
| HIST1H3J     | histone cluster 1 H3 family member j                                       | -1.357159102 | 0.00115336  |
| WASH3P       | WAS protein family homolog 3 pseudogene                                    | 1.273180119  | 0.001154403 |
| MLEC         | malectin                                                                   | 1.393681936  | 0.001178088 |
| VIPR1        | vasoactive intestinal peptide receptor 1                                   | 1.248229977  | 0.001192851 |
| LILRA2       | leukocyte immunoglobulin like receptor A2                                  | -1.288869636 | 0.001210621 |
| ACSS3        | acyl-CoA synthetase short-chain family member 3                            | 1.369816704  | 0.001232621 |
| NEK6         | NIMA related kinase 6                                                      | 1.26119547   | 0.001243334 |
| TTF2         | transcription termination factor 2                                         | -1.322371941 | 0.001259094 |
| SCN3A        | sodium voltage-gated channel alpha subunit 3                               | 1.215028628  | 0.001270737 |
| SSRP1        | structure specific recognition protein 1                                   | 1.209983664  | 0.001291043 |
| CYP20A1      | cytochrome P450 family 20 subfamily A member 1                             | 1.314294427  | 0.001292872 |
| IFIH1        | interferon induced with helicase C domain 1                                | -1.867668889 | 0.001297286 |
| LOC100129034 | uncharacterized LOC100129034                                               | 1.276927304  | 0.001328882 |
| PLS3-AS1     | PLS3 antisense RNA 1                                                       | 1.253472616  | 0.001416321 |
| ZFP36        | ZFP36 ring finger protein                                                  | -1.338703554 | 0.001419856 |
| GCSHP3       | glycine cleavage system protein H pseudogene 3                             | 1.720280873  | 0.001426852 |
| PPIP5K1      | diphosphoinositol pentakisphosphate kinase 1                               | 1.301597718  | 0.001450373 |
| MYCL         | v-myc avian myelocytomatosis viral oncogene lung carcinoma derived homolog | 1.262941875  | 0.001473967 |
| MIR3926-2    | microRNA 3926-2                                                            | -1.274712088 | 0.001520833 |
| RPL39L       | ribosomal protein L39 like                                                 | -1.394602625 | 0.00152438  |
| MSRA         | methionine sulfoxide reductase A                                           | -1.295340013 | 0.001551104 |
| LOC105379013 | uncharacterized LOC105379013                                               | 2.003091813  | 0.001576357 |

|              |                                                       |              |             |
|--------------|-------------------------------------------------------|--------------|-------------|
| RNF213       | ring finger protein 213                               | -1.374217119 | 0.001589072 |
| BIRC3        | baculoviral IAP repeat containing 3                   | -1.6407883   | 0.00158945  |
| CFAP126      | cilia and flagella associated protein 126             | 1.556067581  | 0.001654795 |
| GHR          | growth hormone receptor                               | 1.38337482   | 0.001703927 |
| MIR181A1HG   | MIR181A1 host gene                                    | -1.284185752 | 0.001708261 |
| NFKBIE       | NFKB inhibitor epsilon                                | -1.222779931 | 0.001766892 |
| HLA-C        | major histocompatibility complex, class I, C          | -1.338706788 | 0.001785695 |
| LOC101927542 | uncharacterized LOC101927542                          | 1.290834919  | 0.001789819 |
| LOC101928462 | uncharacterized LOC101928462                          | 1.342306142  | 0.001838053 |
| DPF3         | double PHD fingers 3                                  | 1.228181561  | 0.001862071 |
| HMHB1        | histocompatibility minor HB-1                         | -1.23385538  | 0.001868774 |
| KPNA2        | karyopherin subunit alpha 2                           | -1.385126122 | 0.001872084 |
| PSMB8-AS1    | PSMB8 antisense RNA 1 (head to head)                  | -1.254616604 | 0.001873093 |
| NCAPG        | non-SMC condensin I complex subunit G                 | -1.231274097 | 0.001909829 |
| SAMD9L       | sterile alpha motif domain containing 9 like          | -1.642119408 | 0.001917832 |
| UQCRHL       | ubiquinol-cytochrome c reductase hinge protein like   | -1.235246608 | 0.001941006 |
| NT5C3A       | 5'-nucleotidase, cytosolic IIIA                       | -1.397272152 | 0.001946086 |
| MIR576       | microRNA 576                                          | -1.215030382 | 0.001948058 |
| LOC105370524 | uncharacterized LOC105370524                          | 1.26924875   | 0.001953529 |
| BHLHE40      | basic helix-loop-helix family member e40              | 1.409678884  | 0.001965467 |
| MRPS18C      | mitochondrial ribosomal protein S18C                  | -1.228741733 | 0.002024079 |
| PPARA        | peroxisome proliferator activated receptor alpha      | 1.564675351  | 0.002068441 |
| XAGE-4       | XAGE-4 protein                                        | -1.294201768 | 0.002147185 |
| LCMT1        | leucine carboxyl methyltransferase 1                  | -1.216466335 | 0.002167662 |
| DDX11L9      | DEAD/H-box helicase 11 like 9                         | -1.26505878  | 0.002207783 |
| MID1IP1-AS1  | MID1IP1 antisense RNA 1                               | 1.391618186  | 0.002214971 |
| GBP1         | guanylate binding protein 1                           | -1.477206485 | 0.002227865 |
| SAMD9        | sterile alpha motif domain containing 9               | -1.935997983 | 0.002231845 |
| RUSC1-AS1    | RUSC1 antisense RNA 1                                 | 1.286957242  | 0.002249435 |
| TBL1X        | transducin beta like 1X-linked                        | 1.282845804  | 0.002271253 |
| LINC01358    | long intergenic non-protein coding RNA 1358           | -1.218769113 | 0.002308708 |
| MAP2K1       | mitogen-activated protein kinase kinase 1             | 1.31746141   | 0.002379995 |
| IFITM4P      | interferon induced transmembrane protein 4 pseudogene | -1.316011344 | 0.002405186 |
| ANO1         | anoctamin 1                                           | 1.537418921  | 0.00244399  |
| CYP3A43      | cytochrome P450 family 3 subfamily A member 43        | 1.961188997  | 0.00246213  |

|              |                                                     |              |             |
|--------------|-----------------------------------------------------|--------------|-------------|
| GBP4         | guanylate binding protein 4                         | -1.483740455 | 0.002482125 |
| LOC399886    | uncharacterized LOC399886                           | -1.208874876 | 0.002534518 |
| KLHDC3       | kelch domain containing 3                           | 1.262336738  | 0.002559868 |
| ZC2HC1B      | zinc finger C2HC-type containing 1B                 | -1.283663755 | 0.00257745  |
| HIST1H2AG    | histone cluster 1 H2A family member g               | -1.628412873 | 0.002627372 |
| LOC105370700 | uncharacterized LOC105370700                        | 1.232440555  | 0.002635332 |
| ANXA2P3      | annexin A2 pseudogene 3                             | -1.224898136 | 0.002644719 |
| LOC100506302 | uncharacterized LOC100506302                        | 1.308979049  | 0.00268818  |
| ATP6V1F      | ATPase H+ transporting V1 subunit F                 | -1.262617039 | 0.002734717 |
| CMBL         | carboxymethylenebutenolidase homolog                | 1.524545841  | 0.002736704 |
| DEPTOR       | DEP domain containing MTOR-interacting protein      | 1.265151043  | 0.002783557 |
| TRIM31       | tripartite motif containing 31                      | -1.491904208 | 0.002845391 |
| PGP          | phosphoglycolate phosphatase                        | -1.257901084 | 0.002900176 |
| FLJ37453     | uncharacterized LOC729614                           | 1.26825923   | 0.002952173 |
| LOC105369656 | uncharacterized LOC105369656                        | -1.574963318 | 0.003009843 |
| UNC93B1      | unc-93 homolog B1 (C. elegans)                      | -1.215908262 | 0.003033978 |
| ACOX1        | acyl-CoA oxidase 1                                  | 1.278328008  | 0.003076003 |
| RAB32        | RAB32, member RAS oncogene family                   | -1.280065188 | 0.003096829 |
| LOC105373098 | uncharacterized LOC105373098                        | -1.326629328 | 0.003109043 |
| LDLR         | low density lipoprotein receptor                    | 1.330227261  | 0.003115179 |
| LOC105379011 | uncharacterized LOC105379011                        | 1.499606759  | 0.003142483 |
| LOC374890    | uncharacterized LOC374890                           | -1.207661444 | 0.00316429  |
| TYROBP       | TYRO protein tyrosine kinase binding protein        | -1.269285847 | 0.003170133 |
| ZC3H7B       | zinc finger CCCH-type containing 7B                 | 1.239929668  | 0.00319539  |
| LOC554223    | histocompatibility antigen-related                  | -1.203054582 | 0.003223417 |
| WWP1         | WW domain containing E3 ubiquitin protein ligase 1  | 1.281187961  | 0.003290126 |
| SRGN         | serglycin                                           | -1.337020553 | 0.003369667 |
| APOL6        | apolipoprotein L6                                   | -1.3037033   | 0.003393877 |
| MIR4636      | microRNA 4636                                       | -1.285582133 | 0.003436268 |
| EGR2         | early growth response 2                             | -1.248301318 | 0.003449068 |
| LOC105378668 | uncharacterized LOC105378668                        | 1.27779994   | 0.003558404 |
| FDPS         | farnesyl diphosphate synthase                       | 1.526675409  | 0.003559337 |
| LOC102723878 | uncharacterized LOC102723878                        | -1.210681594 | 0.00355934  |
| MPP6         | membrane palmitoylated protein 6                    | 1.222769623  | 0.003590771 |
| CYP3A4       | cytochrome P450 family 3 subfamily A member 4       | 1.603137442  | 0.003604739 |
| CCNE1        | cyclin E1                                           | -1.241740126 | 0.003631135 |
| ATXN1        | ataxin 1                                            | 1.217850847  | 0.003632137 |
| SLC25A23     | solute carrier family 25 member 23                  | 1.249966945  | 0.003647021 |
| MIR548A3     | microRNA 548a-3                                     | -1.273565858 | 0.003653685 |
| LAIR2        | leukocyte associated immunoglobulin like receptor 2 | -1.376651384 | 0.003691653 |

|              |                                                           |              |             |
|--------------|-----------------------------------------------------------|--------------|-------------|
| GNG7         | G protein subunit gamma 7                                 | 1.368838028  | 0.003700575 |
| LOC100507663 | uncharacterized LOC100507663                              | -1.218476555 | 0.003728062 |
| ARMCX4       | armadillo repeat containing, X-linked 4                   | 1.269737694  | 0.003795093 |
| PRTN3        | proteinase 3                                              | -1.291776889 | 0.003810882 |
| C6orf226     | chromosome 6 open reading frame 226                       | -1.364160902 | 0.003829972 |
| LINC00888    | long intergenic non-protein coding RNA 888                | -1.348448296 | 0.003835249 |
| IDO1         | indoleamine 2,3-dioxygenase 1                             | -1.222615139 | 0.003901111 |
| PRR29        | proline rich 29                                           | -1.228666649 | 0.003916443 |
| TLR3         | toll like receptor 3                                      | -1.35624191  | 0.003938373 |
| PLOD1        | procollagen-lysine,2-oxoglutarate 5-dioxygenase 1         | 1.229064269  | 0.003941582 |
| HIST2H2AA4   | histone cluster 2 H2A family member a4                    | -1.401945632 | 0.003953029 |
| TRANK1       | tetratricopeptide repeat and ankyrin repeat containing 1  | -1.378954601 | 0.003992168 |
| APOBEC3G     | apolipoprotein B mRNA editing enzyme catalytic subunit 3G | -1.3677342   | 0.003997702 |
| XAF1         | XIAP associated factor 1                                  | -1.857863286 | 0.004065363 |
| ORAI2        | ORAI calcium release-activated calcium modulator 2        | -1.235657154 | 0.004118105 |
| RFESD        | Rieske Fe-S domain containing                             | 1.23575838   | 0.004133803 |
| NTHL1        | nth like DNA glycosylase 1                                | 1.344501525  | 0.004135177 |
| MELK         | maternal embryonic leucine zipper kinase                  | -1.270599953 | 0.004162355 |
| C5orf56      | chromosome 5 open reading frame 56                        | -1.26769588  | 0.004222265 |
| SETD7        | SET domain containing lysine methyltransferase 7          | 1.362158793  | 0.004231582 |
| HIST1H2BN    | histone cluster 1 H2B family member n                     | -1.305096878 | 0.00430468  |
| PAQR9-AS1    | PAQR9 antisense RNA 1                                     | 1.443605398  | 0.004311734 |
| BBOF1        | basal body orientation factor 1                           | 1.283433343  | 0.004343393 |
| XCL2         | X-C motif chemokine ligand 2                              | -1.381601304 | 0.004366952 |
| RGS1         | regulator of G-protein signaling 1                        | -1.299380103 | 0.004393236 |
| LOC101929959 | ribosome biogenesis protein BMS1 homolog                  | -1.415708053 | 0.004467535 |
| SYNGR2       | synaptogyrin 2                                            | -1.215228001 | 0.004475543 |
| HELZ2        | helicase with zinc finger 2                               | -1.250800246 | 0.004477477 |
| SORD         | sorbitol dehydrogenase                                    | 1.764826446  | 0.004483391 |
| PRORY        | proline rich, Y-linked                                    | 1.204220001  | 0.004536783 |
| PAIP2B       | poly(A) binding protein interacting protein 2B            | 1.453698457  | 0.004564292 |
| CD58         | CD58 molecule                                             | -1.279450379 | 0.00457066  |
| CD83         | CD83 molecule                                             | -1.408890497 | 0.004604445 |
| TRIM48       | tripartite motif containing 48                            | -1.348486192 | 0.004627254 |
| STARD4-AS1   | STARD4 antisense RNA 1                                    | 1.27576853   | 0.004640711 |

|              |                                                            |              |             |
|--------------|------------------------------------------------------------|--------------|-------------|
| ZBTB48       | zinc finger and BTB domain containing 48                   | 1.277542832  | 0.004643501 |
| SEPHS1       | selenophosphate synthetase 1                               | 1.205175564  | 0.004643516 |
| LOC100129518 | uncharacterized LOC100129518                               | 1.450309835  | 0.004683515 |
| ZNF132       | zinc finger protein 132                                    | 1.207498586  | 0.004699149 |
| TREM2        | triggering receptor expressed on myeloid cells 2           | -1.412290564 | 0.004702685 |
| MIR4435-2HG  | MIR4435-2 host gene                                        | -1.42287971  | 0.004864498 |
| ARRDC3       | arrestin domain containing 3                               | 1.525821114  | 0.004870807 |
| SRPRA        | SRP receptor alpha subunit                                 | 1.258799261  | 0.004936924 |
| SMIM13       | small integral membrane protein 13                         | -1.238113535 | 0.004978011 |
| EIF2AK2      | eukaryotic translation initiation factor 2 alpha kinase 2  | -1.551096801 | 0.00499379  |
| NDRG2        | NDRG family member 2                                       | 1.307878222  | 0.004996449 |
| SLC16A2      | solute carrier family 16 member 2                          | 1.536833131  | 0.005006588 |
| ALAD         | aminolevulinic acid dehydratase                            | 1.482128032  | 0.005016007 |
| RARRES3      | retinoic acid receptor responder 3                         | -1.418744428 | 0.005070548 |
| PRAMEF18     | PRAME family member 18                                     | -1.549068501 | 0.005110224 |
| CCL4         | C-C motif chemokine ligand 4                               | -1.696267974 | 0.005183547 |
| TPPP2        | tubulin polymerization promoting protein family member 2   | 1.416332901  | 0.005261439 |
| VAMP5        | vesicle associated membrane protein 5                      | -1.335151013 | 0.00530427  |
| LOC105376208 | uncharacterized LOC105376208                               | -1.207361584 | 0.005318808 |
| LSS          | lanosterol synthase (2,3-oxidosqualene-lanosterol cyclase) | 1.563133961  | 0.005323788 |
| HLA-F        | major histocompatibility complex, class I, F               | -1.390839003 | 0.005358091 |
| ZNFX1        | zinc finger NFX1-type containing 1                         | -1.461233984 | 0.00537676  |
| PAPSS2       | 3'-phosphoadenosine 5'-phosphosulfate synthase 2           | 1.253273483  | 0.005458683 |
| LOC105379551 | uncharacterized LOC105379551                               | -1.436276454 | 0.005465952 |
| CCNB1IP1     | cyclin B1 interacting protein 1                            | 1.395048654  | 0.005514291 |
| IL6          | interleukin 6                                              | -1.270253581 | 0.005524365 |
| LGALS9       | galectin 9                                                 | -1.568597133 | 0.0055249   |
| BMP1         | bone morphogenetic protein 1                               | 1.251848674  | 0.00556441  |
| REN          | renin                                                      | 1.304966552  | 0.005594698 |
| MLK4         | mixed lineage kinase 4                                     | 1.266981683  | 0.00559891  |
| HLA-E        | major histocompatibility complex, class I, E               | -1.283497019 | 0.005612347 |
| CHRNA3       | cholinergic receptor nicotinic alpha 3 subunit             | -1.208986425 | 0.005642546 |
| MX2          | MX dynamin like GTPase 2                                   | -1.635144141 | 0.005728397 |
| LOC101927331 | uncharacterized LOC101927331                               | 1.796962698  | 0.005776355 |
| MGC39584     | uncharacterized LOC441058                                  | -1.232427535 | 0.005812997 |
| CASP1        | caspase 1                                                  | -1.247790578 | 0.005842726 |
| PACSIN3      | protein kinase C and casein kinase substrate in neurons 3  | 1.303242192  | 0.005854873 |

|              |                                                                                      |              |             |
|--------------|--------------------------------------------------------------------------------------|--------------|-------------|
| HN1L         | hematological and neurological expressed 1 like                                      | 1.213234397  | 0.005858388 |
| PSMG2        | proteasome assembly chaperone 2                                                      | -1.236460493 | 0.005864651 |
| HLA-L        | major histocompatibility complex, class I, L (pseudogene)                            | -1.266271091 | 0.005911388 |
| AMBRA1       | autophagy and beclin 1 regulator 1                                                   | -1.204998222 | 0.005911957 |
| MIR133B      | microRNA 133b                                                                        | -1.218028505 | 0.005916678 |
| ASB18        | ankyrin repeat and SOCS box containing 18                                            | 1.202284559  | 0.005923613 |
| TERB2        | telomere repeat binding bouquet formation protein 2                                  | 1.401341969  | 0.005975481 |
| HCG26        | HLA complex group 26 (non-protein coding)                                            | -1.659636625 | 0.005986847 |
| CHID1        | chitinase domain containing 1                                                        | 1.220593816  | 0.006012616 |
| OR2B6        | olfactory receptor family 2 subfamily B member 6                                     | -1.276656329 | 0.006084408 |
| KIR2DL2      | killer cell immunoglobulin like receptor, two Ig domains and long cytoplasmic tail 2 | -1.281725124 | 0.00611361  |
| ANO7L1       | anoctamin 7 like 1                                                                   | -1.342735059 | 0.0061154   |
| LIPC         | lipase C, hepatic type                                                               | 1.826616422  | 0.006127694 |
| SUCLG2       | succinate-CoA ligase GDP-forming beta subunit                                        | 1.262917252  | 0.006131551 |
| BCL7A        | BCL tumor suppressor 7A                                                              | 1.230928446  | 0.006143985 |
| UBD          | ubiquitin D                                                                          | -2.004222519 | 0.006152245 |
| CLEC4E       | C-type lectin domain family 4 member E                                               | -1.21704847  | 0.006168402 |
| ALDH1L1      | aldehyde dehydrogenase 1 family member L1                                            | 1.526589627  | 0.006256383 |
| ERCC2        | ERCC excision repair 2, TFIIH core complex helicase subunit                          | 1.238176159  | 0.006256751 |
| MEIS2        | Meis homeobox 2                                                                      | 1.278637623  | 0.00627205  |
| LOC105378616 | uncharacterized LOC105378616                                                         | 1.231641653  | 0.006313276 |
| AGL          | amylo-alpha-1, 6-glucosidase, 4-alpha-glucanotransferase                             | 1.403392866  | 0.006315592 |
| SYCE2        | synaptonemal complex central element protein 2                                       | 1.346245123  | 0.006429066 |
| HOMER2       | homer scaffolding protein 2                                                          | 1.526450868  | 0.006442758 |
| SLC47A1      | solute carrier family 47 member 1                                                    | 1.83978459   | 0.006469699 |
| CAPN5        | calpain 5                                                                            | 1.346405199  | 0.006482182 |
| MSX2P1       | msh homeobox 2 pseudogene 1                                                          | -1.210186795 | 0.006543386 |
| IYD          | iodotyrosine deiodinase                                                              | 1.563297255  | 0.006558549 |
| SLC17A2      | solute carrier family 17 member 2                                                    | 1.87333544   | 0.006594012 |
| TNFSF4       | tumor necrosis factor superfamily member 4                                           | -1.267240435 | 0.006675711 |
| LINC00266-1  | long intergenic non-protein coding RNA 266-1                                         | -1.289336601 | 0.006715458 |
| HLA-A        | major histocompatibility complex, class I, A                                         | -1.251511963 | 0.00677024  |

|              |                                                        |              |             |
|--------------|--------------------------------------------------------|--------------|-------------|
| GNA15        | G protein subunit alpha 15                             | -1.27362254  | 0.006780472 |
| PCSK6        | proprotein convertase subtilisin/kexin type 6          | 1.389755445  | 0.006849857 |
| BPHL         | biphenyl hydrolase like                                | 1.42519753   | 0.006852611 |
| JUNB         | JunB proto-oncogene, AP-1 transcription factor subunit | -1.396322759 | 0.006907598 |
| SFXN2        | sideroflexin 2                                         | 1.458475308  | 0.006928705 |
| SPRR2A       | small proline rich protein 2A                          | -1.360696328 | 0.006944558 |
| MIR891A      | microRNA 891a                                          | -1.27878609  | 0.00695483  |
| CCL20        | C-C motif chemokine ligand 20                          | -1.549720118 | 0.006998927 |
| TOM1L1       | target of myb1 like 1 membrane trafficking protein     | 1.388152541  | 0.007041118 |
| UNC13B       | unc-13 homolog B                                       | 1.207284449  | 0.00705907  |
| LOC105369360 | uncharacterized LOC105369360                           | 1.330929888  | 0.007063914 |
| CCL3L3       | C-C motif chemokine ligand 3 like 3                    | -1.259379398 | 0.007089751 |
| HDAC1        | histone deacetylase 1                                  | 1.220983173  | 0.007114559 |
| FAM160A1     | family with sequence similarity 160 member A1          | 1.213546732  | 0.007116067 |
| PHYH         | phytanoyl-CoA 2-hydroxylase                            | 1.360604343  | 0.007142084 |
| PTMS         | parathymosin                                           | 1.249433073  | 0.007146879 |
| LOC105374780 | uncharacterized LOC105374780                           | -1.303074519 | 0.007147094 |
| SULT1E1      | sulfotransferase family 1E member 1                    | 1.810122983  | 0.007154936 |
| DSN1         | DSN1 homolog, MIS12 kinetochore complex component      | -1.223236157 | 0.007162669 |
| TM7SF2       | transmembrane 7 superfamily member 2                   | 1.334647113  | 0.007243289 |
| SHISA5       | shisa family member 5                                  | -1.219692039 | 0.007380629 |
| ADGRA3       | adhesion G protein-coupled receptor A3                 | 1.540157819  | 0.00739376  |
| SNORA36B     | small nucleolar RNA, H/ACA box 36B                     | -1.629939069 | 0.007405847 |
| LOC105378020 | uncharacterized LOC105378020                           | -1.249063493 | 0.007420739 |
| ATE1-AS1     | ATE1 antisense RNA 1                                   | 1.213922469  | 0.007427835 |
| PBLD         | phenazine biosynthesis like protein domain containing  | 1.469844409  | 0.007449371 |
| FADS2        | fatty acid desaturase 2                                | 1.334591392  | 0.007467437 |
| FAM185A      | family with sequence similarity 185 member A           | 1.264939516  | 0.00749023  |
| KLRD1        | killer cell lectin like receptor D1                    | -1.247592525 | 0.007493583 |
| IVD          | isovaleryl-CoA dehydrogenase                           | 1.493466855  | 0.007498082 |
| PROS1        | protein S (alpha)                                      | 1.435835309  | 0.007554003 |
| C3orf14      | chromosome 3 open reading frame 14                     | -1.223603397 | 0.007567907 |
| ABHD1        | abhydrolase domain containing 1                        | 1.352775765  | 0.00763734  |
| ELOVL6       | ELOVL fatty acid elongase 6                            | 1.438574551  | 0.007654384 |
| ANO1-AS2     | ANO1 antisense RNA 2 (head to head)                    | 1.389367145  | 0.00766423  |
| LMO7DN-IT1   | LMO7DN intronic transcript 1                           | -1.234702854 | 0.007737194 |
| SLC5A12      | solute carrier family 5 member 12                      | 1.375561552  | 0.007852778 |

|              |                                                                                 |              |             |
|--------------|---------------------------------------------------------------------------------|--------------|-------------|
| LOC100288175 | uncharacterized LOC100288175                                                    | -1.526219179 | 0.007865938 |
| LOC100129917 | uncharacterized LOC100129917                                                    | 1.271960267  | 0.007868999 |
| R3HDM2       | R3H domain containing 2                                                         | 1.235294553  | 0.0079272   |
| PCYOX1       | prenylcysteine oxidase 1                                                        | 1.258830281  | 0.007966075 |
| ABHD14B      | abhydrolase domain containing 14B                                               | 1.237336979  | 0.008004708 |
| LOC105379049 | uncharacterized LOC105379049                                                    | 1.243169983  | 0.00813725  |
| SRD5A2       | steroid 5 alpha-reductase 2                                                     | 2.397823302  | 0.008212711 |
| LINC01093    | long intergenic non-protein coding RNA 1093                                     | 1.921583425  | 0.00822248  |
| THNSL1       | threonine synthase like 1                                                       | 1.408205606  | 0.008277976 |
| SOWAHC       | sosondowah ankyrin repeat domain family member C                                | 1.254095212  | 0.008297998 |
| ACAD10       | acyl-CoA dehydrogenase family member 10                                         | 1.289939639  | 0.008311685 |
| RGS10        | regulator of G-protein signaling 10                                             | -1.408559971 | 0.008311959 |
| TMEM97       | transmembrane protein 97                                                        | 1.603922542  | 0.008326666 |
| HIST1H2AI    | histone cluster 1 H2A family member i                                           | -1.350579183 | 0.008348313 |
| ACSM3        | acyl-CoA synthetase medium-chain family member 3                                | 2.055359242  | 0.008354682 |
| HCST         | hematopoietic cell signal transducer                                            | -1.428042783 | 0.008356231 |
| TESPA1       | thymocyte expressed, positive selection associated 1                            | -1.228171013 | 0.008367879 |
| SEC14L3      | SEC14 like lipid binding 3                                                      | 1.607784424  | 0.008371875 |
| SYT4         | synaptotagmin 4                                                                 | -1.209813914 | 0.00837907  |
| MORF4L2-AS1  | MORF4L2 antisense RNA 1                                                         | 1.316278614  | 0.008396699 |
| PROSC        | proline synthetase cotranscribed homolog (bacterial)                            | 1.205674442  | 0.008408021 |
| SAMHD1       | SAM and HD domain containing deoxynucleoside triphosphate triphosphohydrolase 1 | -1.302498274 | 0.008501254 |
| OR4C45       | olfactory receptor family 4 subfamily C member 45                               | -1.342829153 | 0.008595854 |
| CFHR4        | complement factor H related 4                                                   | 1.475266802  | 0.008600195 |
| BOLA3        | bolA family member 3                                                            | -1.255423616 | 0.008646903 |
| ZNF831       | zinc finger protein 831                                                         | -1.441661015 | 0.008661497 |
| GCAT         | glycine C-acetyltransferase                                                     | 1.387108984  | 0.008705845 |
| ECT2         | epithelial cell transforming 2                                                  | -1.244759693 | 0.008713631 |
| ANXA9        | annexin A9                                                                      | 1.637898023  | 0.008744376 |
| TCEB3-AS1    | TCEB3 antisense RNA 1                                                           | 1.352048388  | 0.008767114 |
| ANKRD26      | ankyrin repeat domain 26                                                        | 1.387504316  | 0.008822369 |
| CRAT         | carnitine O-acetyltransferase                                                   | 1.278012103  | 0.008869568 |
| OR52E8       | olfactory receptor family 52 subfamily E member 8                               | -1.22282658  | 0.00900289  |
| BET1L        | Bet1 golgi vesicular membrane trafficking protein like                          | 1.247046417  | 0.009016676 |
| ZNF691       | zinc finger protein 691                                                         | 1.292141043  | 0.009034144 |



|              |                                                       |              |             |
|--------------|-------------------------------------------------------|--------------|-------------|
| ENPP1        | ectonucleotide pyrophosphatase/phosphodiesterase 1    | 1.348007564  | 0.009074879 |
| MAP7         | microtubule associated protein 7                      | 1.259774633  | 0.009081484 |
| TNFRSF12A    | TNF receptor superfamily member 12A                   | -1.566284432 | 0.009143382 |
| CYB5R1       | cytochrome b5 reductase 1                             | 1.215687132  | 0.009196959 |
| IGLL1        | immunoglobulin lambda like polypeptide 1              | 1.20206444   | 0.009248116 |
| RASSF3       | Ras association domain family member 3                | -1.352593238 | 0.009248297 |
| MIR4672      | microRNA 4672                                         | -1.200910775 | 0.009330249 |
| KCTD3        | potassium channel tetramerization domain containing 3 | 1.267392423  | 0.009335937 |
| THSD4        | thrombospondin type 1 domain containing 4             | 1.222595416  | 0.009386692 |
| MRPS31P5     | mitochondrial ribosomal protein S31 pseudogene 5      | -1.228905363 | 0.009413175 |
| FOXRED1      | FAD dependent oxidoreductase domain containing 1      | 1.357140662  | 0.009425564 |
| CSH1         | chorionic somatomammotropin hormone 1                 | -1.238215675 | 0.009434576 |
| ABCA6        | ATP binding cassette subfamily A member 6             | 1.335715871  | 0.009454323 |
| LOC105374716 | uncharacterized LOC105374716                          | 1.51870564   | 0.009541017 |
| CYP2A6       | cytochrome P450 family 2 subfamily A member 6         | 1.881674877  | 0.009636942 |
| C8orf4       | chromosome 8 open reading frame 4                     | 1.260575782  | 0.009675907 |
| GBP2         | guanylate binding protein 2                           | -1.282198343 | 0.009722857 |
| STAB2        | stabilin 2                                            | 1.511845294  | 0.009732577 |
| RNF123       | ring finger protein 123                               | 1.248576511  | 0.009735419 |
| MIR4692      | microRNA 4692                                         | 1.441297781  | 0.009809468 |
| SVBP         | small vasohibin binding protein                       | -1.317650993 | 0.009907199 |
| SLC29A2      | solute carrier family 29 member 2                     | 1.227970488  | 0.009939249 |

Supplementary Table 3: List of significantly downregulated pathways

| Pathway               | Database | Genes in list | Genes in pathway | pval   | adj pval | Genes                                                                                                                                                                                                                                                                                                                                                                                                                                                                                                                                                                            |
|-----------------------|----------|---------------|------------------|--------|----------|----------------------------------------------------------------------------------------------------------------------------------------------------------------------------------------------------------------------------------------------------------------------------------------------------------------------------------------------------------------------------------------------------------------------------------------------------------------------------------------------------------------------------------------------------------------------------------|
| immune system process | GO       | 80            | 2418             | <1E-18 | <1E-18   | ISG15 IFITM1 OASL<br>HERC6 CXCL11<br>MX1 DDX60 IFI35<br>CXCL10 OAS3<br>STAT1 IFI44L IFI6<br>PLSCR1 TAP2<br>HERC5 OAS2 IFIT3<br>B2M RSAD2 HLA-G<br>PSMB9 FCGR1A<br>LAMP3 IFI27 IFI30<br>CXCL9 DDX58 OAS1<br>ISG20 RNF19B IRF9<br>TAP1 NMI IFIT1<br>TRIM22 DYNLT1<br>KIR2DL3 IFI16 IFIT2<br>SP100 PML LILRA2<br>IFIH1 BIRC3 HLA-C<br>HMHB1 GBP1<br>TRIM31 UNC93B1<br>RAB32 TYROBP<br>PRTN3 IDO1 TLR3<br>XAF1 MELK XCL2<br>RGS1 CD58 CD83<br>TREM2 EIF2AK2<br>CCL4 HLA-F IL6<br>LGALS9 HLA-E MX2<br>UBD CLEC4E<br>TNFSF4 HLA-A<br>JUNB CCL20<br>CCL3L3 DSN1<br>KLRD1 SAMHD1<br>GBP2 |
| Immune System         | REACTOME | 80            | 2050             | <1E-18 | <1E-18   | ISG15 IFITM1 OASL<br>HERC6 MX1 IFI35<br>CXCL10 OAS3<br>SOCS1 STAT1 IFI6<br>TAP2 HERC5 OAS2<br>UBE2L6 TRIM69<br>IFIT3 B2M RSAD2<br>HLA-G PSMB9<br>FCGR1A IFI27 IFI30<br>DDX58 OAS1 ISG20<br>RNF19B IRF9 TAP1<br>IFIT1 TRIM22<br>DYNLT1 KIR2DL3                                                                                                                                                                                                                                                                                                                                    |

|                     |    |    |      |        |        |                                                                                                                                                                                                                                                                                                                                                                                                                                                                                                                                                                                                                                                                                                                                                                                                                                                                                                                                                     |
|---------------------|----|----|------|--------|--------|-----------------------------------------------------------------------------------------------------------------------------------------------------------------------------------------------------------------------------------------------------------------------------------------------------------------------------------------------------------------------------------------------------------------------------------------------------------------------------------------------------------------------------------------------------------------------------------------------------------------------------------------------------------------------------------------------------------------------------------------------------------------------------------------------------------------------------------------------------------------------------------------------------------------------------------------------------|
|                     |    |    |      |        |        | IFI16 IFIT2 SP100<br>PML LILRA2 IFIH1<br>RNF213 BIRC3<br>NFKBIE HLA-C<br>KPNA2 GBP1 GBP4<br>ATP6V1F TRIM31<br>UNC93B1 TYROBP<br>LAIR2 PRTN3 TLR3<br>XAF1 ORAI2 CD58<br>TRIM48 TREM2<br>EIF2AK2 CCL4 HLA-<br>F IL6 LGALS9 HLA-E<br>MX2 CASP1<br>KIR2DL2 CLEC4E<br>TNFSF4 HLA-A<br>JUNB CCL20<br>CCL3L3 DSN1<br>KLRD1 HCST<br>SAMHD1 CSH1<br>GBP2<br>ISG15 IFITM1 OASL<br>CXCL11 MX1 DDX60<br>IFI35 CXCL10 OAS3<br>STAT1 IFI6 TAP2<br>HERC5 OAS2 IFIT3<br>B2M RSAD2 HLA-G<br>FCGR1A LAMP3<br>IFI27 IFI30 CXCL9<br>DDX58 OAS1 ISG20<br>RNF19B IRF9 TAP1<br>NMI IFIT1 TRIM22<br>DYNLT1 KIR2DL3<br>IFI16 IFIT2 SP100<br>PML LILRA2 IFIH1<br>HLA-C HMHB1<br>GBP1 TRIM31<br>UNC93B1 TYROBP<br>PRTN3 TLR3 XAF1<br>XCL2 RGS1 CD58<br>CD83 TREM2<br>EIF2AK2 CCL4 HLA-<br>F IL6 LGALS9 HLA-E<br>MX2 UBD CLEC4E<br>TNFSF4 HLA-A<br>CCL20 CCL3L3<br>DSN1 KLRD1<br>SAMHD1 GBP2<br>ISG15 IFITM1 OASL<br>CXCL11 MX1 DDX60<br>IFI35 CXCL10 OAS3<br>STAT1 IFI44L IFI6 |
| immune<br>response  | GO | 71 | 1492 | <1E-18 | <1E-18 |                                                                                                                                                                                                                                                                                                                                                                                                                                                                                                                                                                                                                                                                                                                                                                                                                                                                                                                                                     |
| defense<br>response | GO | 67 | 1247 | <1E-18 | <1E-18 |                                                                                                                                                                                                                                                                                                                                                                                                                                                                                                                                                                                                                                                                                                                                                                                                                                                                                                                                                     |

|                                              |              |    |     |        |        |                                                                                                                                                                                                                                                                                                                                                                                                                                                                                                                                                                                                                                                                                                                                                                                                                                                                                                                                                            |
|----------------------------------------------|--------------|----|-----|--------|--------|------------------------------------------------------------------------------------------------------------------------------------------------------------------------------------------------------------------------------------------------------------------------------------------------------------------------------------------------------------------------------------------------------------------------------------------------------------------------------------------------------------------------------------------------------------------------------------------------------------------------------------------------------------------------------------------------------------------------------------------------------------------------------------------------------------------------------------------------------------------------------------------------------------------------------------------------------------|
|                                              |              |    |     |        |        | PLSCR1 HERC5<br>MDK OAS2 IFIT3<br>B2M RSAD2 HLA-G<br>FCGR1A IFI27 IFI30<br>CXCL9 DDX58 HCP5<br>OAS1 ISG20 IRF9<br>TAP1 NMI IFIT1<br>TRIM22 IFI16 IFIT2<br>SP100 PML LILRA2<br>IFIH1 HLA-C GBP1<br>TRIM31 UNC93B1<br>TYROBP IDO1 TLR3<br>XAF1 XCL2 CD58<br>CD83 TREM2<br>EIF2AK2 CCL4 HLA-<br>F IL6 LGALS9 HLA-E<br>MX2 UBD CLEC4E<br>TNFSF4 HLA-A<br>CCL20 CCL3L3<br>KLRD1 SAMHD1<br>GBP2<br>ISG15 IFITM1 OASL<br>CXCL11 MX1 IFI35<br>CXCL10 OAS3<br>SOCS1 STAT1 IFI6<br>PLSCR1 OAS2 IFIT3<br>B2M RSAD2 HLA-G<br>PSMB9 FCGR1A<br>LAMP3 IFI27 IFI30<br>CXCL9 OAS1 ISG20<br>IRF9 NMI IFIT1<br>TRIM22 IFIT2 SP100<br>PML ZFP36 BIRC3<br>HLA-C GBP1<br>TRIM31 CCNE1<br>TLR3 XAF1 XCL2<br>CD58 EIF2AK2 CCL4<br>HLA-F IL6 LGALS9<br>HLA-E MX2 UBD<br>TNFSF4 HLA-A<br>JUNB CCL20<br>CCL3L3 SAMHD1<br>GBP2<br>ISG15 IFITM1 OASL<br>MX1 IFI35 CXCL10<br>OAS3 SOCS1<br>STAT1 IFI6 HERC5<br>OAS2 UBE2L6 IFIT3<br>B2M RSAD2 HLA-G<br>PSMB9 FCGR1A<br>IFI27 IFI30 DDX58 |
| response to<br>cytokine                      | GO           | 57 | 762 | <1E-18 | <1E-18 |                                                                                                                                                                                                                                                                                                                                                                                                                                                                                                                                                                                                                                                                                                                                                                                                                                                                                                                                                            |
| Cytokine<br>Signaling in<br>Immune<br>system | REACTO<br>ME | 55 | 741 | <1E-18 | <1E-18 |                                                                                                                                                                                                                                                                                                                                                                                                                                                                                                                                                                                                                                                                                                                                                                                                                                                                                                                                                            |

|                                |    |    |     |        |        |                                                                                                                                                                                                                                                                                                                                                                                                                                                                                                                                                                                                                                                                                                                                                                                                                                                                                                                                                                    |
|--------------------------------|----|----|-----|--------|--------|--------------------------------------------------------------------------------------------------------------------------------------------------------------------------------------------------------------------------------------------------------------------------------------------------------------------------------------------------------------------------------------------------------------------------------------------------------------------------------------------------------------------------------------------------------------------------------------------------------------------------------------------------------------------------------------------------------------------------------------------------------------------------------------------------------------------------------------------------------------------------------------------------------------------------------------------------------------------|
|                                |    |    |     |        |        | OAS1 ISG20 IRF9<br>IFIT1 TRIM22 IFIT2<br>SP100 PML BIRC3<br>HLA-C KPNA2 GBP1<br>GBP4 TRIM31<br>PRTN3 XAF1<br>TRIM48 EIF2AK2<br>CCL4 HLA-F IL6<br>LGALS9 HLA-E MX2<br>CASP1 TNFSF4<br>HLA-A JUNB CCL20<br>CCL3L3 SAMHD1<br>CSH1 GBP2<br>ISG15 IFITM1 OASL<br>MX1 DDX60 IFI35<br>OAS3 STAT1 IFI6<br>HERC5 OAS2 IFIT3<br>B2M RSAD2 HLA-G<br>FCGR1A IFI27 IFI30<br>DDX58 OAS1 ISG20<br>IRF9 NMI IFIT1<br>TRIM22 IFI16 IFIT2<br>SP100 PML IFIH1<br>HLA-C GBP1<br>TRIM31 UNC93B1<br>TYROBP TLR3 XAF1<br>XCL2 CD58 TREM2<br>EIF2AK2 CCL4 HLA-<br>F LGALS9 HLA-E<br>MX2 UBD CLEC4E<br>HLA-A CCL20<br>CCL3L3 KLRD1<br>SAMHD1 GBP2<br>ISG15 IFITM1 OASL<br>CMPK2 CXCL11<br>MX1 DDX60 CXCL10<br>OAS3 SOCS1<br>STAT1 IFI44L<br>PLSCR1 HERC5<br>OAS2 IFIT3 B2M<br>RSAD2 PSMB9 IFI44<br>CXCL9 DDX58 OAS1<br>ISG20 IRF9 IFIT1<br>TRIM22 IFI16 IFIT2<br>PML IFIH1 ZFP36<br>GBP1 UNC93B1<br>PRTN3 IDO1 TLR3<br>TREM2 EIF2AK2<br>CCL4 IL6 LGALS9<br>HLA-E MX2 CASP1<br>CLEC4E TNFSF4 |
| innate immune<br>response      | GO | 54 | 611 | <1E-18 | <1E-18 |                                                                                                                                                                                                                                                                                                                                                                                                                                                                                                                                                                                                                                                                                                                                                                                                                                                                                                                                                                    |
| response to<br>biotic stimulus | GO | 51 | 921 | <1E-18 | <1E-18 |                                                                                                                                                                                                                                                                                                                                                                                                                                                                                                                                                                                                                                                                                                                                                                                                                                                                                                                                                                    |

|                                                 |    |    |     |        |        |                                                                                                                                                                                                                                                                                                                                                                                          |
|-------------------------------------------------|----|----|-----|--------|--------|------------------------------------------------------------------------------------------------------------------------------------------------------------------------------------------------------------------------------------------------------------------------------------------------------------------------------------------------------------------------------------------|
|                                                 |    |    |     |        |        | HLA-A JUNB CCL20<br>SAMHD1<br>ISG15 IFITM1 OASL<br>CMPK2 CXCL11<br>MX1 DDX60 CXCL10<br>OAS3 SOCS1<br>STAT1 IFI44L<br>PLSCR1 HERC5<br>OAS2 IFIT3 B2M<br>RSAD2 PSMB9 IFI44<br>CXCL9 DDX58 OAS1<br>ISG20 IRF9 IFIT1<br>TRIM22 IFI16 IFIT2<br>PML IFIH1 ZFP36<br>GBP1 UNC93B1<br>PRTN3 IDO1 TLR3<br>TREM2 EIF2AK2<br>CCL4 IL6 LGALS9<br>HLA-E MX2 CASP1<br>CLEC4E TNFSF4<br>HLA-A JUNB CCL20 |
| response to<br>external biotic<br>stimulus      | GO | 51 | 889 | <1E-18 | <1E-18 | SAMHD1<br>ISG15 IFITM1 OASL<br>CMPK2 CXCL11<br>MX1 DDX60 CXCL10<br>OAS3 SOCS1<br>STAT1 IFI44L<br>PLSCR1 HERC5<br>OAS2 IFIT3 B2M<br>RSAD2 PSMB9 IFI44<br>CXCL9 DDX58 OAS1<br>ISG20 IRF9 IFIT1<br>TRIM22 IFI16 IFIT2<br>PML IFIH1 ZFP36<br>GBP1 UNC93B1<br>PRTN3 IDO1 TLR3<br>TREM2 EIF2AK2<br>CCL4 IL6 LGALS9<br>HLA-E MX2 CASP1<br>CLEC4E TNFSF4<br>HLA-A JUNB CCL20                     |
| response to<br>other organism                   | GO | 51 | 886 | <1E-18 | <1E-18 | SAMHD1<br>ISG15 IFITM1 OASL<br>CXCL11 MX1 IFI35<br>CXCL10 OAS3<br>SOCS1 STAT1 IFI6<br>OAS2 IFIT3 B2M<br>RSAD2 HLA-G<br>PSMB9 FCGR1A<br>IFI27 IFI30 CXCL9<br>OAS1 ISG20 IRF9                                                                                                                                                                                                              |
| cellular<br>response to<br>cytokine<br>stimulus | GO | 51 | 657 | <1E-18 | <1E-18 |                                                                                                                                                                                                                                                                                                                                                                                          |

|                |    |    |     |        |        |                    |
|----------------|----|----|-----|--------|--------|--------------------|
|                |    |    |     |        |        | NMI IFIT1 TRIM22   |
|                |    |    |     |        |        | IFIT2 SP100 PML    |
|                |    |    |     |        |        | ZFP36 BIRC3 HLA-C  |
|                |    |    |     |        |        | GBP1 TRIM31 TLR3   |
|                |    |    |     |        |        | XAF1 XCL2 CD58     |
|                |    |    |     |        |        | CCL4 HLA-F IL6     |
|                |    |    |     |        |        | LGALS9 HLA-E MX2   |
|                |    |    |     |        |        | TNFSF4 HLA-A       |
|                |    |    |     |        |        | CCL20 CCL3L3       |
|                |    |    |     |        |        | SAMHD1 GBP2        |
|                |    |    |     |        |        | ISG15 IFITM1 OASL  |
|                |    |    |     |        |        | MX1 DDX60 CXCL10   |
|                |    |    |     |        |        | OAS3 STAT1 IFI44L  |
|                |    |    |     |        |        | PLSCR1 TAP2        |
|                |    |    |     |        |        | HERC5 OAS2 IFIT3   |
|                |    |    |     |        |        | B2M RSAD2 PSMB9    |
|                |    |    |     |        |        | IFI44 LAMP3 CXCL9  |
|                |    |    |     |        |        | SP110 DDX58 OAS1   |
|                |    |    |     |        |        | ISG20 IRF9 TAP1    |
|                |    |    |     |        |        | IFIT1 TRIM22       |
|                |    |    |     |        |        | DYNLT1 IFI16 IFIT2 |
|                |    |    |     |        |        | SP100 PML IFIH1    |
|                |    |    |     |        |        | HLA-C KPNA2 GBP1   |
|                |    |    |     |        |        | UNC93B1 TLR3       |
|                |    |    |     |        |        | EIF2AK2 CCL4 IL6   |
| multi-organism |    |    |     |        |        | LGALS9 MX2         |
| cellular       |    |    |     |        |        | TNFSF4 HLA-A       |
| process        | GO | 47 | 967 | <1E-18 | <1E-18 | SAMHD1             |
|                |    |    |     |        |        | ISG15 IFITM1 OASL  |
|                |    |    |     |        |        | MX1 DDX60 CXCL10   |
|                |    |    |     |        |        | OAS3 STAT1 IFI44L  |
|                |    |    |     |        |        | PLSCR1 TAP2        |
|                |    |    |     |        |        | HERC5 OAS2 IFIT3   |
|                |    |    |     |        |        | B2M RSAD2 PSMB9    |
|                |    |    |     |        |        | IFI44 LAMP3 CXCL9  |
|                |    |    |     |        |        | SP110 DDX58 OAS1   |
|                |    |    |     |        |        | ISG20 IRF9 TAP1    |
|                |    |    |     |        |        | IFIT1 TRIM22       |
|                |    |    |     |        |        | DYNLT1 IFI16 IFIT2 |
|                |    |    |     |        |        | SP100 PML IFIH1    |
|                |    |    |     |        |        | HLA-C KPNA2 GBP1   |
|                |    |    |     |        |        | UNC93B1 TLR3       |
|                |    |    |     |        |        | EIF2AK2 CCL4 IL6   |
| interspecies   |    |    |     |        |        | LGALS9 MX2         |
| interaction    |    |    |     |        |        | TNFSF4 HLA-A       |
| between        |    |    |     |        |        | SAMHD1             |
| organisms      | GO | 47 | 963 | <1E-18 | <1E-18 | ISG15 IFITM1 OASL  |
| symbiosis,     |    |    |     |        |        | MX1 DDX60 CXCL10   |
| encompassing   |    |    |     |        |        | OAS3 STAT1 IFI44L  |
| mutualism      |    |    |     |        |        | PLSCR1 TAP2        |
| through        |    |    |     |        |        | HERC5 OAS2 IFIT3   |
| parasitism     | GO | 47 | 960 | <1E-18 | <1E-18 |                    |

|                                     |    |    |     |        |        |                                                                                                                                                                                                                                                                                                                                                                                                                                                                                                                                                                                                                                                                                                                                                                                                                                                                                                             |
|-------------------------------------|----|----|-----|--------|--------|-------------------------------------------------------------------------------------------------------------------------------------------------------------------------------------------------------------------------------------------------------------------------------------------------------------------------------------------------------------------------------------------------------------------------------------------------------------------------------------------------------------------------------------------------------------------------------------------------------------------------------------------------------------------------------------------------------------------------------------------------------------------------------------------------------------------------------------------------------------------------------------------------------------|
|                                     |    |    |     |        |        | B2M RSAD2 PSMB9<br>IFI44 LAMP3 CXCL9<br>SP110 DDX58 OAS1<br>ISG20 IRF9 TAP1<br>IFIT1 TRIM22<br>DYNLT1 IFI16 IFIT2<br>SP100 PML IFIH1<br>HLA-C KPNA2 GBP1<br>UNC93B1 TLR3<br>EIF2AK2 CCL4 IL6<br>LGALS9 MX2<br>TNFSF4 HLA-A<br>SAMHD1<br>ISG15 IFITM1 OASL<br>CXCL11 MX1 IFI35<br>CXCL10 OAS3<br>SOCS1 STAT1 IFI6<br>OAS2 IFIT3 B2M<br>RSAD2 HLA-G<br>PSMB9 FCGR1A<br>IFI27 IFI30 CXCL9<br>OAS1 ISG20 IRF9<br>NMI IFIT1 TRIM22<br>IFIT2 SP100 PML<br>BIRC3 HLA-C GBP1<br>TRIM31 XAF1 XCL2<br>CCL4 HLA-F IL6<br>HLA-E MX2 TNFSF4<br>HLA-A CCL20<br>CCL3L3 SAMHD1<br>GBP2<br>ISG15 IFITM1 OASL<br>MX1 DDX60 CXCL10<br>OAS3 STAT1 IFI44L<br>PLSCR1 TAP2<br>HERC5 OAS2 IFIT3<br>RSAD2 PSMB9 IFI44<br>LAMP3 CXCL9<br>SP110 DDX58 OAS1<br>ISG20 IRF9 TAP1<br>IFIT1 TRIM22<br>DYNLT1 IFI16 IFIT2<br>SP100 PML IFIH1<br>HLA-C KPNA2 GBP1<br>UNC93B1 TLR3<br>EIF2AK2 CCL4 IL6<br>LGALS9 MX2<br>TNFSF4 HLA-A<br>SAMHD1 |
| cytokine-mediated signaling pathway | GO | 47 | 473 | <1E-18 | <1E-18 |                                                                                                                                                                                                                                                                                                                                                                                                                                                                                                                                                                                                                                                                                                                                                                                                                                                                                                             |
| viral process                       | GO | 46 | 811 | <1E-18 | <1E-18 |                                                                                                                                                                                                                                                                                                                                                                                                                                                                                                                                                                                                                                                                                                                                                                                                                                                                                                             |



|                                    |          |    |     |        |        |                                                                                                                                                                                                                                                                                                                |
|------------------------------------|----------|----|-----|--------|--------|----------------------------------------------------------------------------------------------------------------------------------------------------------------------------------------------------------------------------------------------------------------------------------------------------------------|
| immune effector process            | GO       | 43 | 927 | <1E-18 | <1E-18 | ISG15 IFITM1 OASL<br>MX1 DDX60 CXCL10<br>OAS3 STAT1 IFI44L<br>PLSCR1 HERC5<br>OAS2 IFIT3 B2M<br>RSAD2 FCGR1A<br>CXCL9 DDX58 OAS1<br>ISG20 RNF19B IRF9<br>IFIT1 TRIM22<br>DYNLT1 IFI16 IFIT2<br>PML IFIH1 GBP1<br>UNC93B1 TYROBP<br>PRTN3 TLR3 CD58<br>EIF2AK2 IL6 MX2<br>CLEC4E TNFSF4<br>DSN1 KLRD1<br>SAMHD1 |
| Interferon Signaling               | REACTOME | 42 | 197 | <1E-18 | <1E-18 | ISG15 IFITM1 OASL<br>MX1 IFI35 OAS3<br>SOCS1 STAT1 IFI6<br>HERC5 OAS2<br>UBE2L6 IFIT3 B2M<br>RSAD2 HLA-G<br>FCGR1A IFI27 IFI30<br>DDX58 OAS1 ISG20<br>IRF9 IFIT1 TRIM22<br>IFIT2 SP100 PML<br>HLA-C KPNA2 GBP1<br>GBP4 TRIM31 XAF1<br>TRIM48 EIF2AK2<br>HLA-F HLA-E MX2<br>HLA-A SAMHD1<br>GBP2                |
| defense response to other organism | GO       | 38 | 497 | <1E-18 | <1E-18 | ISG15 IFITM1 OASL<br>MX1 DDX60 CXCL10<br>OAS3 STAT1 IFI44L<br>PLSCR1 HERC5<br>OAS2 IFIT3 B2M<br>RSAD2 CXCL9<br>DDX58 OAS1 ISG20<br>IRF9 IFIT1 TRIM22<br>IFI16 IFIT2 PML<br>IFIH1 GBP1<br>UNC93B1 TLR3<br>EIF2AK2 IL6 HLA-E<br>MX2 CLEC4E<br>TNFSF4 HLA-A<br>CCL20 SAMHD1                                       |
| response to virus                  | GO       | 37 | 250 | <1E-18 | <1E-18 | ISG15 IFITM1 OASL<br>MX1 DDX60 CXCL10<br>OAS3 STAT1 IFI44L                                                                                                                                                                                                                                                     |

|                                                 |    |    |     |        |        |                                                                                                                                                                                                                                                                                                                                                                                                                                                                                                                                                                                                                                                                                                                                                                                                                                                                                                                                                                                 |
|-------------------------------------------------|----|----|-----|--------|--------|---------------------------------------------------------------------------------------------------------------------------------------------------------------------------------------------------------------------------------------------------------------------------------------------------------------------------------------------------------------------------------------------------------------------------------------------------------------------------------------------------------------------------------------------------------------------------------------------------------------------------------------------------------------------------------------------------------------------------------------------------------------------------------------------------------------------------------------------------------------------------------------------------------------------------------------------------------------------------------|
|                                                 |    |    |     |        |        | PLSCR1 HERC5<br>OAS2 IFIT3 RSAD2<br>PSMB9 IFI44 CXCL9<br>DDX58 OAS1 ISG20<br>IRF9 IFIT1 TRIM22<br>IFI16 IFIT2 PML<br>IFIH1 GBP1<br>UNC93B1 TLR3<br>EIF2AK2 CCL4 IL6<br>LGALS9 MX2<br>TNFSF4 SAMHD1<br>ISG15 IFITM1 OASL<br>MX1 DDX60 CXCL10<br>OAS3 STAT1 IFI44L<br>PLSCR1 HERC5<br>OAS2 IFIT3 RSAD2<br>CXCL9 DDX58 OAS1<br>ISG20 IRF9 IFIT1<br>TRIM22 IFI16 IFIT2<br>PML IFIH1 GBP1<br>UNC93B1 TLR3<br>EIF2AK2 IL6 MX2<br>SAMHD1<br>IFITM1 OASL OAS3<br>STAT1 OAS2 B2M<br>HLA-G FCGR1A<br>IFI30 OAS1 IRF9<br>NMI TRIM22 SP100<br>PML HLA-C GBP1<br>TRIM31 TLR3 XCL2<br>CD58 CCL4 HLA-F<br>LGALS9 HLA-E UBD<br>HLA-A CCL20<br>CCL3L3 GBP2<br>OASL OAS3 STAT1<br>OAS2 B2M HLA-G<br>FCGR1A IFI30 OAS1<br>IRF9 NMI TRIM22<br>SP100 PML HLA-C<br>GBP1 TRIM31 TLR3<br>XCL2 CD58 CCL4<br>HLA-F LGALS9 HLA-<br>E HLA-A CCL20<br>CCL3L3 GBP2<br>ISG15 IFITM1 OASL<br>MX1 IFI35 OAS3<br>STAT1 IFI6 OAS2<br>IFIT3 RSAD2 HLA-G<br>IFI27 OAS1 ISG20<br>IRF9 IFIT1 IFIT2<br>SP100 HLA-C XAF1 |
| defense<br>response to<br>virus                 | GO | 32 | 164 | <1E-18 | <1E-18 |                                                                                                                                                                                                                                                                                                                                                                                                                                                                                                                                                                                                                                                                                                                                                                                                                                                                                                                                                                                 |
| response to<br>interferon-<br>gamma             | GO | 30 | 145 | <1E-18 | <1E-18 |                                                                                                                                                                                                                                                                                                                                                                                                                                                                                                                                                                                                                                                                                                                                                                                                                                                                                                                                                                                 |
| cellular<br>response to<br>interferon-<br>gamma | GO | 28 | 123 | <1E-18 | <1E-18 |                                                                                                                                                                                                                                                                                                                                                                                                                                                                                                                                                                                                                                                                                                                                                                                                                                                                                                                                                                                 |
| response to<br>type I<br>interferon             | GO | 27 | 69  | <1E-18 | <1E-18 |                                                                                                                                                                                                                                                                                                                                                                                                                                                                                                                                                                                                                                                                                                                                                                                                                                                                                                                                                                                 |

|                                                                         |          |    |     |        |        |                                                                                                                                                                                                                                                                                                                                                                                                                                                                                                                                                                                                                                                                                                                                                                                                                                                                                                              |
|-------------------------------------------------------------------------|----------|----|-----|--------|--------|--------------------------------------------------------------------------------------------------------------------------------------------------------------------------------------------------------------------------------------------------------------------------------------------------------------------------------------------------------------------------------------------------------------------------------------------------------------------------------------------------------------------------------------------------------------------------------------------------------------------------------------------------------------------------------------------------------------------------------------------------------------------------------------------------------------------------------------------------------------------------------------------------------------|
| Interferon alpha/beta signaling                                         | REACTOME | 27 | 68  | <1E-18 | <1E-18 | HLA-F HLA-E MX2<br>HLA-A SAMHD1<br>GBP2<br>ISG15 IFITM1 OASL<br>MX1 IFI35 OAS3<br>SOCS1 STAT1 IFI6<br>OAS2 IFIT3 RSAD2<br>HLA-G IFI27 OAS1<br>ISG20 IRF9 IFIT1<br>IFI27 HLA-C XAF1<br>HLA-F HLA-E MX2<br>HLA-A SAMHD1<br>GBP2<br>ISG15 IFITM1 OASL<br>MX1 IFI35 OAS3<br>STAT1 IFI6 OAS2<br>IFI27 OAS1 ISG20<br>IRF9 IFIT1 IFIT2<br>SP100 HLA-C XAF1<br>HLA-F HLA-E MX2<br>HLA-A SAMHD1<br>GBP2<br>ISG15 IFITM1 OASL<br>MX1 IFI35 OAS3<br>STAT1 IFI6 OAS2<br>IFI27 OAS1 ISG20<br>IRF9 IFIT1 IFIT2<br>SP100 HLA-C XAF1<br>HLA-F HLA-E MX2<br>HLA-A SAMHD1<br>GBP2<br>OASL OAS3 SOCS1<br>STAT1 OAS2 B2M<br>HLA-G FCGR1A<br>IFI30 OAS1 IRF9<br>TRIM22 SP100 PML<br>HLA-C GBP1 GBP4<br>TRIM31 TRIM48<br>HLA-F HLA-E HLA-A<br>GBP2<br>OASL OAS3 STAT1<br>OAS2 B2M HLA-G<br>FCGR1A IFI30 OAS1<br>IRF9 NMI TRIM22<br>SP100 PML HLA-C<br>GBP1 TRIM31 HLA-F<br>HLA-E HLA-A GBP2<br>ISG15 IFITM1 OASL<br>MX1 DDX60 OAS3 |
| type I interferon signaling pathway                                     | GO       | 27 | 65  | <1E-18 | <1E-18 | HLA-F HLA-E MX2<br>HLA-A SAMHD1<br>GBP2<br>ISG15 IFITM1 OASL<br>MX1 IFI35 OAS3<br>STAT1 IFI6 OAS2<br>IFI27 OAS1 ISG20<br>IRF9 IFIT1 IFIT2<br>SP100 HLA-C XAF1<br>HLA-F HLA-E MX2<br>HLA-A SAMHD1<br>GBP2<br>ISG15 IFITM1 OASL<br>MX1 IFI35 OAS3<br>STAT1 IFI6 OAS2<br>IFI27 OAS1 ISG20<br>IRF9 IFIT1 IFIT2<br>SP100 HLA-C XAF1<br>HLA-F HLA-E MX2<br>HLA-A SAMHD1<br>GBP2<br>OASL OAS3 SOCS1<br>STAT1 OAS2 B2M<br>HLA-G FCGR1A<br>IFI30 OAS1 IRF9<br>TRIM22 SP100 PML<br>HLA-C GBP1 GBP4<br>TRIM31 TRIM48<br>HLA-F HLA-E HLA-A<br>GBP2<br>OASL OAS3 STAT1<br>OAS2 B2M HLA-G<br>FCGR1A IFI30 OAS1<br>IRF9 NMI TRIM22<br>SP100 PML HLA-C<br>GBP1 TRIM31 HLA-F<br>HLA-E HLA-A GBP2<br>ISG15 IFITM1 OASL<br>MX1 DDX60 OAS3                                                                                                                                                                                       |
| cellular response to type I interferon                                  | GO       | 27 | 65  | <1E-18 | <1E-18 | HLA-F HLA-E HLA-A<br>GBP2<br>OASL OAS3 STAT1<br>OAS2 B2M HLA-G<br>FCGR1A IFI30 OAS1<br>IRF9 NMI TRIM22<br>SP100 PML HLA-C<br>GBP1 TRIM31 HLA-F<br>HLA-E HLA-A GBP2<br>ISG15 IFITM1 OASL<br>MX1 DDX60 OAS3                                                                                                                                                                                                                                                                                                                                                                                                                                                                                                                                                                                                                                                                                                    |
| Interferon gamma signaling                                              | REACTOME | 23 | 92  | <1E-18 | <1E-18 | HLA-F HLA-E HLA-A<br>GBP2<br>OASL OAS3 STAT1<br>OAS2 B2M HLA-G<br>FCGR1A IFI30 OAS1<br>IRF9 NMI TRIM22<br>SP100 PML HLA-C<br>GBP1 TRIM31 HLA-F<br>HLA-E HLA-A GBP2<br>ISG15 IFITM1 OASL<br>MX1 DDX60 OAS3                                                                                                                                                                                                                                                                                                                                                                                                                                                                                                                                                                                                                                                                                                    |
| interferon-gamma-mediated signaling pathway regulation of viral process | GO       | 21 | 70  | <1E-18 | <1E-18 | HLA-F HLA-E HLA-A<br>GBP2<br>OASL OAS3 STAT1<br>OAS2 B2M HLA-G<br>FCGR1A IFI30 OAS1<br>IRF9 NMI TRIM22<br>SP100 PML HLA-C<br>GBP1 TRIM31 HLA-F<br>HLA-E HLA-A GBP2<br>ISG15 IFITM1 OASL<br>MX1 DDX60 OAS3                                                                                                                                                                                                                                                                                                                                                                                                                                                                                                                                                                                                                                                                                                    |
|                                                                         | GO       | 29 | 387 | <1E-18 | 2E-18  | HLA-F HLA-E HLA-A<br>GBP2<br>OASL OAS3 STAT1<br>OAS2 B2M HLA-G<br>FCGR1A IFI30 OAS1<br>IRF9 NMI TRIM22<br>SP100 PML HLA-C<br>GBP1 TRIM31 HLA-F<br>HLA-E HLA-A GBP2<br>ISG15 IFITM1 OASL<br>MX1 DDX60 OAS3                                                                                                                                                                                                                                                                                                                                                                                                                                                                                                                                                                                                                                                                                                    |

|                                                                    |    |    |      |        |         |                                                                                                                                                                                                                                                                                                                                                                                                                                                                                                                                                                                                                                                                                                                                                                                                                                                                                                                        |
|--------------------------------------------------------------------|----|----|------|--------|---------|------------------------------------------------------------------------------------------------------------------------------------------------------------------------------------------------------------------------------------------------------------------------------------------------------------------------------------------------------------------------------------------------------------------------------------------------------------------------------------------------------------------------------------------------------------------------------------------------------------------------------------------------------------------------------------------------------------------------------------------------------------------------------------------------------------------------------------------------------------------------------------------------------------------------|
| cellular response to organic substance                             | GO | 60 | 2004 | <1E-18 | 6E-18   | STAT1 PLSCR1<br>TAP2 HERC5 B2M<br>RSAD2 LAMP3<br>DDX58 OAS1 ISG20<br>TAP1 IFIT1 DYNLT1<br>IFI16 SP100 PML<br>ZFP36 BIRC3<br>TRIM31 EIF2AK2<br>CCL4 LGALS9 HLA-A<br>ISG15 IFITM1 OASL<br>CMPK2 CXCL11<br>MX1 IFI35 CXCL10<br>OAS3 SOCS1<br>STAT1 IFI6 OAS2<br>IFIT3 B2M RSAD2<br>HLA-G PSMB9<br>FCGR1A IFI27 IFI30<br>CXCL9 OAS1 ISG20<br>IRF9 NMI IFIT1<br>TRIM22 IFIT2 SP100<br>PML ZFP36 BIRC3<br>HLA-C GBP1<br>ATP6V1F TRIM31<br>EGR2 CCNE1 TLR3<br>XAF1 XCL2 CD58<br>TREM2 EIF2AK2<br>CCL4 HLA-F IL6<br>LGALS9 HLA-E MX2<br>CASP1 TNFSF4<br>HLA-A JUNB CCL20<br>CCL3L3 SAMHD1<br>CSH1 GBP2<br>ISG15 IFITM1 OASL<br>MX1 DDX60 OAS3<br>STAT1 PLSCR1<br>TAP2 HERC5 B2M<br>RSAD2 LAMP3<br>DDX58 OAS1 ISG20<br>TAP1 IFIT1 DYNLT1<br>IFI16 SP100 PML<br>ZFP36 BIRC3<br>TRIM31 EIF2AK2<br>CCL4 LGALS9 HLA-A<br>ISG15 IFITM1 OASL<br>CMPK2 CXCL11<br>MX1 IFI35 CXCL10<br>OAS3 SOCS1<br>STAT1 IFI6 PLSCR1<br>MDK OAS2 IFIT3 |
| regulation of symbiosis, encompassing mutualism through parasitism | GO | 29 | 415  | <1E-18 | 1.3E-17 |                                                                                                                                                                                                                                                                                                                                                                                                                                                                                                                                                                                                                                                                                                                                                                                                                                                                                                                        |
| response to organic substance                                      | GO | 70 | 2728 | <1E-18 | 2.3E-17 |                                                                                                                                                                                                                                                                                                                                                                                                                                                                                                                                                                                                                                                                                                                                                                                                                                                                                                                        |

response to  
stress

GO

79

3384

<1E-18

3.7E-  
17

B2M RSAD2 HLA-G  
 PSMB9 FCGR1A  
 LAMP3 IFI27 IFI30  
 CXCL9 DDX58 OAS1  
 ISG20 IRF9 NMI  
 IFIT1 TRIM22 IFIT2  
 SP100 PML ZFP36  
 BIRC3 HLA-C GBP1  
 ATP6V1F TRIM31  
 EGR2 CCNE1 IDO1  
 TLR3 XAF1 XCL2  
 CD58 CD83 TREM2  
 EIF2AK2 CCL4 HLA-  
 F IL6 LGALS9 HLA-E  
 CHRNA3 MX2  
 CASP1 UBD  
 TNFSF4 HLA-A  
 GNA15 JUNB CCL20  
 CCL3L3 RGS10  
 SAMHD1 CSH1  
 GBP2  
 ISG15 IFITM1 OASL  
 CXCL11 MX1 DDX60  
 IFI35 CXCL10 OAS3  
 STAT1 IFI44L IFI6  
 PLSCR1 HERC5  
 MDK OAS2 UBE2L6  
 IFIT3 B2M RSAD2  
 HLA-G PSMB9  
 FCGR1A IFI27 IFI30  
 CXCL9 DDX58 HCP5  
 OAS1 ISG20 IRF9  
 TAP1 NMI IFIT1  
 TRIM22 IFI16 IFIT2  
 SP100 PML BCL2A1  
 LILRA2 IFIH1 ZFP36  
 MSRA HLA-C GBP1  
 TRIM31 UNC93B1  
 TYROBP PRTN3  
 IDO1 TLR3 XAF1  
 MELK XCL2 CD58  
 CD83 TREM2  
 EIF2AK2 CCL4 HLA-  
 F IL6 LGALS9 HLA-E  
 MX2 CASP1  
 AMBRA1 UBD  
 CLEC4E TNFSF4  
 HLA-A GNA15  
 CCL20 CCL3L3  
 SHISA5 KLRD1

|                                         |    |    |      |        |          |                                                                                                                                                                                                                                                                                                                                                                                                                                                                                         |
|-----------------------------------------|----|----|------|--------|----------|-----------------------------------------------------------------------------------------------------------------------------------------------------------------------------------------------------------------------------------------------------------------------------------------------------------------------------------------------------------------------------------------------------------------------------------------------------------------------------------------|
| regulation of immune system process     | GO | 51 | 1546 | <1E-18 | 4.1E-17  | SAMHD1 ECT2<br>GBP2<br>ISG15 IFITM1<br>CXCL11 DDX60<br>CXCL10 SOCS1<br>STAT1 PLSCR1<br>TAP2 HERC5 B2M<br>RSAD2 HLA-G<br>PSMB9 FCGR1A<br>CXCL9 DDX58 TAP1<br>NMI IFIT1 KIR2DL3<br>IFI16 PML IFIH1<br>ZFP36 BIRC3 HLA-C<br>GBP1 UNC93B1<br>TYROBP LAIR2<br>IDO1 TLR3 XCL2<br>CD83 TREM2<br>EIF2AK2 CCL4 HLA-F<br>IL6 LGALS9 HLA-E<br>KIR2DL2 CLEC4E<br>TNFSF4 HLA-A<br>CCL20 KLRD1 HCST<br>TESPA1 SAMHD1<br>ISG15 IFITM1 OASL<br>MX1 OAS3 PLSCR1<br>RSAD2 OAS1 ISG20<br>IFIT1 IFI16 SP100 |
| negative regulation of viral life cycle | GO | 17 | 89   | <1E-18 | 1.12E-16 | PML ZFP36 TRIM31<br>EIF2AK2 CCL4<br>ISG15 IFITM1 OASL<br>MX1 OAS3 STAT1<br>PLSCR1 RSAD2<br>OAS1 ISG20 IFIT1<br>IFI16 SP100 PML                                                                                                                                                                                                                                                                                                                                                          |
| negative regulation of viral process    | GO | 18 | 111  | <1E-18 | 1.37E-16 | ZFP36 TRIM31<br>EIF2AK2 CCL4<br>ISG15 IFITM1 OASL<br>CMPK2 CXCL11<br>MX1 IFI35 CXCL10<br>OAS3 SOCS1<br>STAT1 IFI6 OAS2<br>IFIT3 B2M RSAD2<br>HLA-G PSMB9<br>FCGR1A IFI27 IFI30<br>CXCL9 OAS1 ISG20<br>IRF9 NMI IFIT1<br>TRIM22 IFIT2 SP100                                                                                                                                                                                                                                              |
| cellular response to chemical stimulus  | GO | 65 | 2550 | 1E-18  | 3.56E-16 | PML ZFP36 BIRC3<br>HLA-C GBP1<br>ATP6V1F TRIM31<br>EGR2 CCNE1 TLR3                                                                                                                                                                                                                                                                                                                                                                                                                      |

|                                     |           |    |     |       |           |                                                                                                                                                                                                                                                                                                                                                                                                                                                                                                                                                                                                                                                                                                                                                                                                                                                                                                                    |
|-------------------------------------|-----------|----|-----|-------|-----------|--------------------------------------------------------------------------------------------------------------------------------------------------------------------------------------------------------------------------------------------------------------------------------------------------------------------------------------------------------------------------------------------------------------------------------------------------------------------------------------------------------------------------------------------------------------------------------------------------------------------------------------------------------------------------------------------------------------------------------------------------------------------------------------------------------------------------------------------------------------------------------------------------------------------|
| Type II interferon signaling (IFNG) | WikiPathw | 13 | 36  | 3E-18 | 1.238E-15 | XAF1 MELK XCL2<br>CD58 TREM2<br>EIF2AK2 CCL4 HLA-F IL6 LGALS9 HLA-E<br>CHRNA3 MX2<br>CASP1 TNFSF4<br>HLA-A GNA15 JUNB<br>CCL20 CCL3L3<br>RGS10 SAMHD1<br>ECT2 CSH1 GBP2<br>ISG15 CXCL10<br>SOCS1 STAT1 IFI6<br>PSMB9 CXCL9<br>OAS1 IRF9 TAP1<br>IFIT2 GBP1 EIF2AK2<br>OAS3 STAT1 TAP2<br>OAS2 HLA-G DDX58<br>OAS1 IRF9 TAP1<br>IFIT1 SP100 PML<br>IFIH1 HLA-C TLR3<br>EIF2AK2 HLA-F IL6<br>HLA-E HLA-A<br>IFITM1 DDX60<br>SOCS1 STAT1<br>PLSCR1 TAP2 B2M<br>RSAD2 HLA-G<br>PSMB9 FCGR1A<br>DDX58 TAP1 NMI<br>KIR2DL3 IFI16 IFIH1<br>BIRC3 HLA-C GBP1<br>UNC93B1 TYROBP<br>LAIR2 IDO1 TLR3<br>TREM2 HLA-F IL6<br>LGALS9 HLA-E<br>KIR2DL2 CLEC4E<br>TNFSF4 HLA-A<br>KLRD1 HCST<br>TESPA1 SAMHD1<br>ISG15 DDX60<br>SOCS1 HERC5<br>UBE2L6 B2M RSAD2<br>HLA-G DDX58 NMI<br>IFI16 PML IFIH1<br>ZFP36 BIRC3 GBP1<br>SRGN IDO1 TLR3<br>CD58 CD83 EIF2AK2<br>CCL4 IL6 LGALS9<br>HLA-E CASP1<br>CLEC4E TNFSF4<br>HLA-A CCL20 |
| Herpes simplex infection            | KEGG      | 20 | 182 | 3E-18 | 1.472E-15 |                                                                                                                                                                                                                                                                                                                                                                                                                                                                                                                                                                                                                                                                                                                                                                                                                                                                                                                    |
| regulation of immune response       | GO        | 38 | 943 | 3E-18 | 1.474E-15 |                                                                                                                                                                                                                                                                                                                                                                                                                                                                                                                                                                                                                                                                                                                                                                                                                                                                                                                    |
| regulation of cytokine production   | GO        | 31 | 603 | 5E-18 | 1.974E-15 |                                                                                                                                                                                                                                                                                                                                                                                                                                                                                                                                                                                                                                                                                                                                                                                                                                                                                                                    |

|                                         |    |    |      |         |           |                                                                                                                                                                                                                                                                                                                                                                                                                                                                                                                                                                                                                                                                                                                           |
|-----------------------------------------|----|----|------|---------|-----------|---------------------------------------------------------------------------------------------------------------------------------------------------------------------------------------------------------------------------------------------------------------------------------------------------------------------------------------------------------------------------------------------------------------------------------------------------------------------------------------------------------------------------------------------------------------------------------------------------------------------------------------------------------------------------------------------------------------------------|
| regulation of multi-organism process    | GO | 29 | 522  | 7E-18   | 2.888E-15 | ISG15 IFITM1 OASL<br>MX1 DDX60 OAS3<br>STAT1 PLSCR1<br>TAP2 HERC5 B2M<br>RSAD2 LAMP3<br>DDX58 OAS1 ISG20<br>TAP1 IFIT1 DYNLT1<br>IFI16 SP100 PML<br>ZFP36 BIRC3<br>TRIM31 EIF2AK2<br>CCL4 LGALS9 HLA-A                                                                                                                                                                                                                                                                                                                                                                                                                                                                                                                    |
| multi-organism process                  | GO | 66 | 2778 | 1.1E-17 | 4.418E-15 | ISG15 IFITM1 OASL<br>CMPK2 CXCL11<br>MX1 DDX60 IFI35<br>CXCL10 OAS3<br>SOCS1 STAT1<br>IFI44L PLSCR1<br>TAP2 HERC5 OAS2<br>IFIT3 B2M RSAD2<br>PSMB9 IFI44<br>FCGR1A LAMP3<br>CXCL9 SP110<br>DDX58 OAS1 ISG20<br>IRF9 TDRD7 TAP1<br>IFIT1 TRIM22<br>DYNLT1 IFI16 IFIT2<br>SP100 PML IFIH1<br>ZFP36 RPL39L<br>BIRC3 HLA-C<br>KPNA2 GBP1<br>ATP6V1F UNC93B1<br>PRTN3 IDO1 TLR3<br>TREM2 EIF2AK2<br>CCL4 IL6 LGALS9<br>HLA-E MX2 CASP1<br>CLEC4E TNFSF4<br>HLA-A JUNB CCL20<br>SAMHD1 GBP2<br>ISG15 IFITM1 OASL<br>CXCL11 MX1 IFI35<br>CXCL10 OAS3<br>SOCS1 STAT1 IFI6<br>MDK OAS2 IFIT3<br>B2M RSAD2 HLA-G<br>PSMB9 FCGR1A<br>IFI27 IFI30 CXCL9<br>OAS1 ISG20 IRF9<br>NMI IFIT1 TRIM22<br>IFI2 SP100 PML<br>BCL2A1 BIRC3 HLA- |
| cell surface receptor signaling pathway | GO | 57 | 2171 | 1.5E-17 | 6.181E-15 |                                                                                                                                                                                                                                                                                                                                                                                                                                                                                                                                                                                                                                                                                                                           |



|                                                        |          |    |      |              |                 |                                                                                                                                                                                                                                                                                                                                                                                                                                                                                                                                                                                                                                                                                                                                                                                                                                                                                                                                   |
|--------------------------------------------------------|----------|----|------|--------------|-----------------|-----------------------------------------------------------------------------------------------------------------------------------------------------------------------------------------------------------------------------------------------------------------------------------------------------------------------------------------------------------------------------------------------------------------------------------------------------------------------------------------------------------------------------------------------------------------------------------------------------------------------------------------------------------------------------------------------------------------------------------------------------------------------------------------------------------------------------------------------------------------------------------------------------------------------------------|
|                                                        |          |    |      |              |                 | C GBP1 ATP6V1F<br>TRIM31 TYROBP<br>CCNE1 TLR3 XAF1<br>XCL2 CCL4 HLA-F<br>IL6 HLA-E CHRNA3<br>MX2 CLEC4E<br>TNFSF4 HLA-A<br>CCL20 CCL3L3<br>KLRD1 SAMHD1<br>CSH1 GBP2<br>ISG15 IFITM1 OASL<br>MX1 OAS3 PLSCR1<br>RSAD2 LAMP3<br>OAS1 ISG20 IFIT1<br>IFI16 SP100 PML<br>ZFP36 TRIM31<br>EIF2AK2 CCL4<br>LGALS9<br>ISG15 IFITM1 OASL<br>MX1 OAS3 STAT1<br>PLSCR1 RSAD2<br>OAS1 ISG20 IFIT1<br>IFI16 SP100 PML<br>ZFP36 TRIM31<br>EIF2AK2 CCL4<br>ISG15 IFITM1 OASL<br>CMPK2 CXCL11<br>MX1 DDX60 CXCL10<br>OAS3 SOCS1<br>STAT1 IFI44L<br>PLSCR1 HERC5<br>OAS2 IFIT3 B2M<br>RSAD2 PSMB9 IFI44<br>CXCL9 DDX58 OAS1<br>ISG20 IRF9 IFIT1<br>TRIM22 IFI16 IFIT2<br>TYMP PML IFIH1<br>ZFP36 GBP1<br>UNC93B1 RAB32<br>TYROBP EGR2<br>CCNE1 PRTN3 IDO1<br>TLR3 XCL2 TREM2<br>EIF2AK2 CCL4 IL6<br>LGALS9 HLA-E MX2<br>CASP1 AMBRA1<br>CLEC4E TNFSF4<br>HLA-A JUNB CCL20<br>CCL3L3 SAMHD1<br>IFITM1 B2M HLA-G<br>FCGR1A KIR2DL3<br>LILRA2 HLA-C |
| regulation of<br>viral life cycle                      | GO       | 19 | 197  | 1.94E-<br>16 | 7.589E<br>-14   |                                                                                                                                                                                                                                                                                                                                                                                                                                                                                                                                                                                                                                                                                                                                                                                                                                                                                                                                   |
| negative<br>regulation of<br>multi-organism<br>process | GO       | 18 | 169  | 2.3E-16      | 8.8355<br>E-14  |                                                                                                                                                                                                                                                                                                                                                                                                                                                                                                                                                                                                                                                                                                                                                                                                                                                                                                                                   |
| response to<br>external<br>stimulus                    | GO       | 59 | 2491 | 3.58E-<br>16 | 1.3465<br>4E-13 |                                                                                                                                                                                                                                                                                                                                                                                                                                                                                                                                                                                                                                                                                                                                                                                                                                                                                                                                   |
| Immunoregulatory<br>interactions                       | REACTOME | 16 | 124  | 6.17E-<br>16 | 2.2735<br>4E-13 |                                                                                                                                                                                                                                                                                                                                                                                                                                                                                                                                                                                                                                                                                                                                                                                                                                                                                                                                   |

|                                                          |    |    |      |               |                 |                                                                                                                                                                                                                                                                                                                                                                                                                                                                                                                                                                                                                                                                                                                                                                                                                                                                                                                             |
|----------------------------------------------------------|----|----|------|---------------|-----------------|-----------------------------------------------------------------------------------------------------------------------------------------------------------------------------------------------------------------------------------------------------------------------------------------------------------------------------------------------------------------------------------------------------------------------------------------------------------------------------------------------------------------------------------------------------------------------------------------------------------------------------------------------------------------------------------------------------------------------------------------------------------------------------------------------------------------------------------------------------------------------------------------------------------------------------|
| between a<br>Lymphoid and<br>a non-<br>Lymphoid cell     |    |    |      |               |                 | TYROBP LAIR2<br>TREM2 HLA-F HLA-<br>E KIR2DL2 HLA-A<br>KLRD1 HCST<br>ISG15 CXCL11<br>DDX60 CXCL10<br>SOCS1 STAT1<br>PLSCR1 TAP2 B2M<br>RSAD2 HLA-G<br>PSMB9 FCGR1A<br>CXCL9 DDX58 TAP1<br>IFI16 IFIH1 BIRC3<br>HLA-C UNC93B1<br>IDO1 TLR3 XCL2<br>CD83 TREM2 CCL4<br>HLA-F IL6 LGALS9<br>HLA-E CLEC4E<br>TNFSF4 HLA-A<br>CCL20 TESPA1<br>DDX60 SOCS1<br>STAT1 PLSCR1<br>HERC5 B2M RSAD2<br>PSMB9 FCGR1A<br>DDX58 TAP1 NMI<br>IFIT1 IFI16 PML<br>IFIH1 ZFP36 BIRC3<br>UNC93B1 IDO1<br>TLR3 XCL2 EIF2AK2<br>CCL4 IL6 LGALS9<br>HLA-E CASP1<br>CLEC4E TNFSF4<br>HLA-A CCL3L3<br>SAMHD1<br>ISG15 IFITM1 OASL<br>CMPK2 CXCL11<br>MX1 IFI35 CXCL10<br>OAS3 SOCS1<br>STAT1 RTP4 IFI6<br>PLSCR1 HERC5<br>MDK OAS2 UBE2L6<br>IFIT3 B2M RSAD2<br>HLA-G PSMB9<br>FCGR1A LAMP3<br>IFI27 IFI30 CXCL9<br>DDX58 OAS1 ISG20<br>IRF9 NMI IFIT1<br>TRIM22 OR4C15<br>IFIT2 TYMP SP100<br>PML ZFP36 BIRC3<br>HLA-C KPNA2 GBP1<br>ATP6V1F TRIM31 |
| positive<br>regulation of<br>immune<br>system<br>process | GO | 36 | 1005 | 6.64E-<br>16  | 2.3972<br>4E-13 |                                                                                                                                                                                                                                                                                                                                                                                                                                                                                                                                                                                                                                                                                                                                                                                                                                                                                                                             |
| regulation of<br>defense<br>response                     | GO | 33 | 864  | 1.561E-<br>15 | 5.5289<br>E-13  |                                                                                                                                                                                                                                                                                                                                                                                                                                                                                                                                                                                                                                                                                                                                                                                                                                                                                                                             |
| response to<br>chemical                                  | GO | 81 | 4360 | 3.395E-<br>15 | 1.1799<br>5E-12 |                                                                                                                                                                                                                                                                                                                                                                                                                                                                                                                                                                                                                                                                                                                                                                                                                                                                                                                             |

|                                                 |      |    |      |            |             |                                                                                                                                                                                                                                                                                                                                                                                                                                                                                                               |
|-------------------------------------------------|------|----|------|------------|-------------|---------------------------------------------------------------------------------------------------------------------------------------------------------------------------------------------------------------------------------------------------------------------------------------------------------------------------------------------------------------------------------------------------------------------------------------------------------------------------------------------------------------|
|                                                 |      |    |      |            |             | EGR2 CCNE1 IDO1<br>TLR3 XAF1 MELK<br>XCL2 CD58 CD83<br>TREM2 EIF2AK2<br>CCL4 HLA-F IL6<br>LGALS9 HLA-E<br>CHRNA3 MX2<br>CASP1 OR2B6 UBD<br>TNFSF4 HLA-A<br>GNA15 JUNB CCL20<br>CCL3L3 RGS10<br>SAMHD1 OR4C45<br>ECT2 OR52E8 CSH1<br>GBP2                                                                                                                                                                                                                                                                      |
| negative regulation of viral genome replication | GO   | 12 | 51   | 3.957E-15  | 1.34961E-12 | ISG15 IFITM1 OASL<br>MX1 OAS3 PLSCR1<br>RSAD2 OAS1 ISG20<br>IFIT1 IFI16 EIF2AK2<br>MX1 CXCL10 OAS3<br>STAT1 OAS2 RSAD2<br>DDX58 OAS1 IRF9<br>PML IFIH1 KPNA2                                                                                                                                                                                                                                                                                                                                                  |
| Influenza A                                     | KEGG | 16 | 169  | 5.1051E-14 | 1.67903E-11 | TLR3 EIF2AK2 IL6<br>CASP1<br>ISG15 IFITM1 OASL<br>CXCL11 MX1 IFI35<br>CXCL10 OAS3<br>SOCS1 STAT1 IFI6<br>MDK OAS2 IFIT3<br>B2M RSAD2 HLA-G<br>PSMB9 FCGR1A<br>IFI27 IFI30 CXCL9<br>SP110 DDX58 OAS1<br>ISG20 IRF9 NMI<br>IFIT1 TRIM22<br>OR4C15 IFI16 IFIT2<br>SP100 PML BCL2A1<br>LILRA2 IFIH1 ZFP36<br>BIRC3 HLA-C GBP1<br>ATP6V1F TRIM31<br>UNC93B1 RAB32<br>TYROBP SRGN<br>CCNE1 TLR3 XAF1<br>MELK XCL2 RGS1<br>CD83 EIF2AK2 CCL4<br>HLA-F IL6 LGALS9<br>HLA-E CHRNA3 MX2<br>CASP1 OR2B6<br>CLEC4E TNFSF4 |
| signal transduction                             | GO   | 82 | 4737 | 7.7947E-14 | 2.51866E-11 | HLA-A GNA15<br>CCL20 CCL3L3                                                                                                                                                                                                                                                                                                                                                                                                                                                                                   |

|                                                     |              |    |      |                 |                 |                                                                                                                                                                                                                                                                                                                                                                                                                                                                                                                                                                                                                                                                                                                                                                                                                                                                                                                                              |
|-----------------------------------------------------|--------------|----|------|-----------------|-----------------|----------------------------------------------------------------------------------------------------------------------------------------------------------------------------------------------------------------------------------------------------------------------------------------------------------------------------------------------------------------------------------------------------------------------------------------------------------------------------------------------------------------------------------------------------------------------------------------------------------------------------------------------------------------------------------------------------------------------------------------------------------------------------------------------------------------------------------------------------------------------------------------------------------------------------------------------|
|                                                     |              |    |      |                 |                 | SHISA5 KLRD1<br>RGS10 SAMHD1<br>OR4C45 ZNF831<br>ECT2 OR52E8<br>RASSF3 CSH1<br>GBP2<br>IFITM1 HERC6<br>SOCS1 TAP2<br>HERC5 UBE2L6<br>TRIM69 B2M HLA-G<br>PSMB9 FCGR1A<br>IFI30 RNF19B TAP1<br>KIR2DL3 LILRA2<br>RNF213 NFKBIE<br>HLA-C TYROBP<br>LAIR2 ORAI2<br>TREM2 HLA-F HLA-E<br>KIR2DL2 HLA-A<br>KLRD1 HCST<br>TAP2 B2M HLA-G<br>IFI30 TAP1 KIR2DL3<br>HLA-C HLA-F HLA-E<br>KIR2DL2 HLA-A<br>KLRD1<br>DDX60 B2M RSAD2<br>HLA-G DDX58 IFI16<br>IFIH1 IDO1 TLR3<br>CD58 CD83 EIF2AK2<br>CCL4 IL6 LGALS9<br>HLA-E CASP1<br>CLEC4E TNFSF4<br>HLA-A CCL20<br>ISG15 IFITM1 OASL<br>MX1 OAS3 PLSCR1<br>RSAD2 OAS1 ISG20<br>IFIT1 IFI16 EIF2AK2<br>ISG15 IFITM1 OASL<br>CXCL11 MX1 IFI35<br>CXCL10 OAS3<br>SOCS1 STAT1 IFI6<br>MDK OAS2 IFIT3<br>B2M RSAD2 HLA-G<br>PSMB9 FCGR1A<br>IFI27 IFI30 CXCL9<br>SP110 DDX58 OAS1<br>ISG20 IRF9 NMI<br>IFIT1 TRIM22<br>OR4C15 IFI16 IFIT2<br>SP100 PML BCL2A1<br>LILRA2 IFIH1 ZFP36<br>BIRC3 HLA-C GBP1 |
| Adaptive<br>Immune<br>System                        | REACTO<br>ME | 29 | 799  | 2.0219<br>1E-13 | 6.2066<br>1E-11 |                                                                                                                                                                                                                                                                                                                                                                                                                                                                                                                                                                                                                                                                                                                                                                                                                                                                                                                                              |
| Antigen<br>processing<br>and<br>presentation        | KEGG         | 12 | 74   | 1.9883<br>5E-13 | 6.2066<br>1E-11 |                                                                                                                                                                                                                                                                                                                                                                                                                                                                                                                                                                                                                                                                                                                                                                                                                                                                                                                                              |
| positive<br>regulation of<br>cytokine<br>production | GO           | 21 | 389  | 2.5409<br>E-13  | 7.6718<br>5E-11 |                                                                                                                                                                                                                                                                                                                                                                                                                                                                                                                                                                                                                                                                                                                                                                                                                                                                                                                                              |
| regulation of<br>viral genome<br>replication        | GO           | 12 | 81   | 5.2052<br>1E-13 | 1.5462<br>8E-10 |                                                                                                                                                                                                                                                                                                                                                                                                                                                                                                                                                                                                                                                                                                                                                                                                                                                                                                                                              |
| cell<br>communication                               | GO           | 85 | 5274 | 1.1322<br>E-12  | 3.3099<br>7E-10 |                                                                                                                                                                                                                                                                                                                                                                                                                                                                                                                                                                                                                                                                                                                                                                                                                                                                                                                                              |



|               |    |    |      |        |        |                    |
|---------------|----|----|------|--------|--------|--------------------|
|               |    |    |      |        |        | CLEC4E TNFSF4      |
|               |    |    |      |        |        | HLA-A GNA15 JUNB   |
|               |    |    |      |        |        | CCL20 CCL3L3       |
|               |    |    |      |        |        | DSN1 SHISA5        |
|               |    |    |      |        |        | KLRD1 RGS10 SYT4   |
|               |    |    |      |        |        | SAMHD1 OR4C45      |
|               |    |    |      |        |        | ZNF831 ECT2        |
|               |    |    |      |        |        | OR52E8 RASSF3      |
|               |    |    |      |        |        | CSH1 GBP2          |
|               |    |    |      |        |        | ISG15 IFITM1 OASL  |
|               |    |    |      |        |        | CXCL11 MX1 IFI35   |
|               |    |    |      |        |        | CXCL10 OAS3        |
|               |    |    |      |        |        | SOCS1 STAT1 IFI6   |
|               |    |    |      |        |        | HERC5 MDK OAS2     |
|               |    |    |      |        |        | UBE2L6 IFIT3 B2M   |
|               |    |    |      |        |        | RSAD2 HLA-G        |
|               |    |    |      |        |        | PSMB9 FCGR1A       |
|               |    |    |      |        |        | IFI27 IFI30 CXCL9  |
|               |    |    |      |        |        | SP110 DDX58 OAS1   |
|               |    |    |      |        |        | ISG20 IRF9 NMI     |
|               |    |    |      |        |        | IFIT1 TRIM22       |
|               |    |    |      |        |        | OR4C15 IFI16 IFIT2 |
|               |    |    |      |        |        | SP100 PML BCL2A1   |
|               |    |    |      |        |        | LILRA2 IFIH1 ZFP36 |
|               |    |    |      |        |        | BIRC3 HLA-C        |
|               |    |    |      |        |        | KPNA2 GBP1         |
|               |    |    |      |        |        | ATP6V1F TRIM31     |
|               |    |    |      |        |        | UNC93B1 RAB32      |
|               |    |    |      |        |        | TYROBP SRGN        |
|               |    |    |      |        |        | EGR2 CCNE1 TLR3    |
|               |    |    |      |        |        | XAF1 MELK XCL2     |
|               |    |    |      |        |        | RGS1 CD83          |
|               |    |    |      |        |        | EIF2AK2 CCL4       |
|               |    |    |      |        |        | VAMP5 HLA-F IL6    |
|               |    |    |      |        |        | LGALS9 HLA-E       |
|               |    |    |      |        |        | CHRNA3 MX2         |
|               |    |    |      |        |        | CASP1 OR2B6        |
|               |    |    |      |        |        | CLEC4E TNFSF4      |
|               |    |    |      |        |        | HLA-A GNA15 JUNB   |
|               |    |    |      |        |        | CCL20 CCL3L3       |
|               |    |    |      |        |        | DSN1 SHISA5        |
|               |    |    |      |        |        | KLRD1 RGS10 SYT4   |
|               |    |    |      |        |        | SAMHD1 OR4C45      |
|               |    |    |      |        |        | ZNF831 ECT2        |
| single        |    |    |      |        |        | OR52E8 RASSF3      |
| organism      |    |    |      | 1.7821 | 4.9732 | CSH1 GBP2          |
| signaling     | GO | 90 | 5795 | 4E-12  | 4E-10  | TAP2 B2M RSAD2     |
| positive      |    |    |      |        |        | HLA-G FCGR1A       |
| regulation of |    |    |      |        |        | TAP1 HLA-C HLA-F   |
| lymphocyte    |    |    |      | 2.8597 | 7.7457 | IL6 HLA-E TNFSF4   |
| mediated      |    |    |      | 5E-12  | 1E-10  | HLA-A              |
| immunity      | GO | 12 | 95   |        |        |                    |

|                                                                                                                                                  |    |    |     |                 |                 |                                                                                                                                                                                                                                                                                                                     |
|--------------------------------------------------------------------------------------------------------------------------------------------------|----|----|-----|-----------------|-----------------|---------------------------------------------------------------------------------------------------------------------------------------------------------------------------------------------------------------------------------------------------------------------------------------------------------------------|
| positive regulation of adaptive immune response based on somatic recombination of immune receptors built from immunoglobulin superfamily domains | GO | 12 | 95  | 2.8597<br>5E-12 | 7.7457<br>1E-10 | TAP2 B2M RSAD2<br>HLA-G FCGR1A<br>TAP1 HLA-C HLA-F<br>IL6 HLA-E TNFSF4<br>HLA-A                                                                                                                                                                                                                                     |
| positive regulation of adaptive immune response                                                                                                  | GO | 12 | 99  | 4.4472<br>9E-12 | 1.1871<br>1E-09 | TAP2 B2M RSAD2<br>HLA-G FCGR1A<br>TAP1 HLA-C HLA-F<br>IL6 HLA-E TNFSF4<br>HLA-A<br>DDX60 PLSCR1<br>TAP2 B2M RSAD2<br>HLA-G PSMB9<br>FCGR1A DDX58<br>TAP1 IFI16 IFIH1<br>BIRC3 HLA-C<br>UNC93B1 IDO1<br>TLR3 HLA-F IL6<br>LGALS9 HLA-E<br>CLEC4E TNFSF4<br>HLA-A TESPA1                                              |
| positive regulation of immune response antigen processing and presentation of exogenous peptide antigen via MHC class I                          | GO | 25 | 690 | 7.4734<br>8E-12 | 1.9663<br>8E-09 | TAP2 B2M HLA-G<br>PSMB9 FCGR1A<br>IFI30 TAP1 HLA-C<br>HLA-F HLA-E HLA-A<br>DDX60 TAP2 HERC5<br>B2M RSAD2 HLA-G<br>FCGR1A DDX58<br>TAP1 IFIT1 PML<br>BIRC3 HLA-C TLR3<br>EIF2AK2 HLA-F IL6<br>LGALS9 HLA-E<br>TNFSF4 HLA-A<br>TAP2 B2M RSAD2<br>HLA-G FCGR1A<br>TAP1 HLA-C HLA-F<br>IL6 LGALS9 HLA-E<br>TNFSF4 HLA-A |
| regulation of immune effector process                                                                                                            | GO | 21 | 473 | 8.3314<br>5E-12 | 2.1312<br>3E-09 |                                                                                                                                                                                                                                                                                                                     |
| regulation of lymphocyte mediated immunity                                                                                                       | GO | 13 | 138 | 1.1098<br>6E-11 | 2.8002<br>E-09  |                                                                                                                                                                                                                                                                                                                     |

|                                                                                                      |                  |        |          |                                    |                                    |                                                                                                                                                                                                  |
|------------------------------------------------------------------------------------------------------|------------------|--------|----------|------------------------------------|------------------------------------|--------------------------------------------------------------------------------------------------------------------------------------------------------------------------------------------------|
| modification of morphology or physiology of other organism involved in symbiotic interaction         | GO               | 20     | 436      | 1.4231<br>9E-11                    | 3.4180<br>3E-09                    | ISG15 STAT1 TAP2<br>RSAD2 PSMB9<br>SP110 DDX58 TAP1<br>IFIT1 TRIM22<br>DYNLT1 SP100 PML<br>IFIH1 HLA-C KPNA2<br>TLR3 EIF2AK2 CCL4<br>HLA-A<br>IFITM1 OASL MX1<br>OAS3 PLSCR1<br>RSAD2 OAS1 IFIT1 |
| negative regulation of reproductive process                                                          | GO               | 12     | 110      | 1.3749<br>5E-11                    | 3.4180<br>3E-09                    | IFI16 SP100<br>EIF2AK2 CCL4<br>HLA-G KIR2DL3<br>HLA-C HLA-F IL6                                                                                                                                  |
| Graft-versus-host disease Antigen Presentation: Folding, assembly and peptide loading of class I MHC | KEGG<br>REACTOME | 9<br>8 | 40<br>25 | 1.4289<br>7E-11<br>1.7380<br>3E-11 | 3.4180<br>3E-09<br>4.1039<br>8E-09 | HLA-E KIR2DL2<br>HLA-A KLRD1<br>TAP2 B2M HLA-G<br>TAP1 HLA-C HLA-F<br>HLA-E HLA-A<br>TAP2 B2M RSAD2<br>HLA-G FCGR1A<br>TAP1 HLA-C HLA-F                                                          |
| positive regulation of leukocyte mediated immunity                                                   | GO               | 12     | 114      | 2.0159<br>8E-11                    | 4.7000<br>4E-09                    | IL6 HLA-E TNFSF4<br>HLA-A<br>ISG15 STAT1 TAP2<br>RSAD2 PSMB9<br>SP110 DDX58 TAP1<br>IFIT1 TRIM22<br>DYNLT1 SP100 PML<br>IFIH1 HLA-C KPNA2                                                        |
| modification of morphology or physiology of other organism                                           | GO               | 20     | 452      | 2.6122<br>2E-11                    | 6.0139<br>8E-09                    | TLR3 EIF2AK2 CCL4<br>HLA-A<br>TAP2 B2M RSAD2<br>HLA-G FCGR1A<br>TAP1 HLA-C TLR3<br>HLA-F IL6 LGALS9                                                                                              |
| regulation of leukocyte mediated immunity                                                            | GO               | 14     | 186      | 3.0547<br>7E-11                    | 6.9460<br>2E-09                    | HLA-E TNFSF4 HLA-A<br>ISG15 IFITM1 OASL<br>CMPK2 CXCL11<br>MX1 DDX60 IFI35<br>CXCL10 OAS3<br>SOCS1 STAT1<br>IFI44L RTP4 IFI6                                                                     |
| response to stimulus                                                                                 | GO               | 110    | 8044     | 3.3365<br>2E-11                    | 7.4941<br>4E-09                    | PLSCR1 TAP2<br>HERC5 MDK OAS2                                                                                                                                                                    |



|               |    |    |     |        |        |                    |
|---------------|----|----|-----|--------|--------|--------------------|
|               |    |    |     |        |        | UBE2L6 IFIT3 B2M   |
|               |    |    |     |        |        | RSAD2 HLA-G        |
|               |    |    |     |        |        | PSMB9 IFI44        |
|               |    |    |     |        |        | FCGR1A LAMP3       |
|               |    |    |     |        |        | IFI27 IFI30 CXCL9  |
|               |    |    |     |        |        | SP110 DDX58 HCP5   |
|               |    |    |     |        |        | OAS1 ISG20         |
|               |    |    |     |        |        | RNF19B IRF9 TAP1   |
|               |    |    |     |        |        | NMI IFIT1 TRIM22   |
|               |    |    |     |        |        | DYNLT1 KIR2DL3     |
|               |    |    |     |        |        | OR4C15 IFI16 IFIT2 |
|               |    |    |     |        |        | TYMP SP100 PML     |
|               |    |    |     |        |        | BCL2A1 LILRA2      |
|               |    |    |     |        |        | IFIH1 ZFP36 MSRA   |
|               |    |    |     |        |        | BIRC3 HLA-C        |
|               |    |    |     |        |        | HMHB1 KPNA2        |
|               |    |    |     |        |        | GBP1 ATP6V1F       |
|               |    |    |     |        |        | TRIM31 UNC93B1     |
|               |    |    |     |        |        | RAB32 TYROBP       |
|               |    |    |     |        |        | SRGN EGR2 CCNE1    |
|               |    |    |     |        |        | PRTN3 IDO1 TLR3    |
|               |    |    |     |        |        | XAF1 MELK XCL2     |
|               |    |    |     |        |        | RGS1 CD58 CD83     |
|               |    |    |     |        |        | TREM2 EIF2AK2      |
|               |    |    |     |        |        | CCL4 HLA-F IL6     |
|               |    |    |     |        |        | LGALS9 HLA-E       |
|               |    |    |     |        |        | CHRNA3 MX2         |
|               |    |    |     |        |        | CASP1 AMBRA1       |
|               |    |    |     |        |        | OR2B6 UBD          |
|               |    |    |     |        |        | CLEC4E TNFSF4      |
|               |    |    |     |        |        | HLA-A GNA15 JUNB   |
|               |    |    |     |        |        | CCL20 CCL3L3       |
|               |    |    |     |        |        | DSN1 SHISA5        |
|               |    |    |     |        |        | KLRD1 RGS10        |
|               |    |    |     |        |        | SAMHD1 OR4C45      |
|               |    |    |     |        |        | ZNF831 ECT2        |
|               |    |    |     |        |        | OR52E8 RASSF3      |
|               |    |    |     |        |        | CSH1 GBP2          |
|               |    |    |     |        |        | DDX60 PLSCR1       |
|               |    |    |     |        |        | RSAD2 PSMB9        |
|               |    |    |     |        |        | FCGR1A DDX58       |
|               |    |    |     |        |        | IFI16 IFIH1 BIRC3  |
|               |    |    |     |        |        | UNC93B1 IDO1       |
| positive      |    |    |     |        |        | TLR3 XCL2 CCL4     |
| regulation of |    |    |     |        |        | IL6 LGALS9 HLA-E   |
| defense       |    |    |     | 3.6371 | 8.0710 | CLEC4E TNFSF4      |
| response      | GO | 20 | 461 | 8E-11  | 2E-09  | CCL3L3             |
| negative      |    |    |     |        |        | ISG15 HERC5        |
| regulation of |    |    |     |        |        | UBE2L6 DDX58 NMI   |
| cytokine      |    |    |     | 4.7193 | 1.0347 | PML IFIH1 ZFP36    |
| production    | GO | 15 | 232 | 2E-11  | 7E-08  | GBP1 SRGN IDO1     |

|                                                                                                                       |    |    |      |                 |                 |                                                                                                                                                                                                                                                                                                                                                                                                                                                                                                                                                                                                                                                                                              |
|-----------------------------------------------------------------------------------------------------------------------|----|----|------|-----------------|-----------------|----------------------------------------------------------------------------------------------------------------------------------------------------------------------------------------------------------------------------------------------------------------------------------------------------------------------------------------------------------------------------------------------------------------------------------------------------------------------------------------------------------------------------------------------------------------------------------------------------------------------------------------------------------------------------------------------|
| positive regulation of immune effector process antigen processing and presentation of peptide antigen via MHC class I | GO | 14 | 197  | 6.2172<br>2E-11 | 1.3471<br>6E-08 | CD83 IL6 LGALS9<br>TNFSF4<br>DDX60 TAP2 B2M<br>RSAD2 HLA-G<br>FCGR1A TAP1 HLA-C<br>HLA-F IL6 LGALS9<br>HLA-E TNFSF4 HLA-A                                                                                                                                                                                                                                                                                                                                                                                                                                                                                                                                                                    |
| response to bacterium                                                                                                 | GO | 21 | 538  | 7.1200<br>1E-11 | 1.5248<br>4E-08 | TAP2 B2M HLA-G<br>PSMB9 FCGR1A<br>IFI30 TAP1 HLA-C<br>HLA-F HLA-E HLA-A<br>ISG15 CMPK2<br>CXCL11 CXCL10<br>SOCS1 B2M CXCL9<br>ZFP36 IDO1 TLR3<br>TREM2 EIF2AK2 IL6<br>LGALS9 HLA-E<br>CASP1 CLEC4E<br>TNFSF4 HLA-A<br>JUNB CCL20<br>ISG15 IFITM1 OASL<br>CMPK2 CXCL11<br>MX1 IFI35 CXCL10<br>OAS3 SOCS1<br>STAT1 IFI6 MDK<br>OAS2 UBE2L6 IFIT3<br>B2M RSAD2 HLA-G<br>PSMB9 FCGR1A<br>IFI27 IFI30 CXCL9<br>SP110 DDX58 OAS1<br>ISG20 IRF9 NMI<br>IFIT1 TRIM22<br>OR4C15 IFI16 IFIT2<br>SP100 PML BCL2A1<br>LILRA2 IFIH1 ZFP36<br>BIRC3 HLA-C GBP1<br>ATP6V1F TRIM31<br>UNC93B1 RAB32<br>TYROBP SRGN<br>EGR2 CCNE1 TLR3<br>XAF1 MELK XCL2<br>RGS1 CD58 CD83<br>TREM2 EIF2AK2<br>CCL4 HLA-F IL6 |
| cellular response to stimulus                                                                                         | GO | 89 | 6172 | 9.1108<br>1E-11 | 1.9068<br>5E-08 | LGALS9 HLA-E<br>CHRNA3 MX2<br>CASP1 AMBRA1                                                                                                                                                                                                                                                                                                                                                                                                                                                                                                                                                                                                                                                   |

|                                                                                                                                             |          |    |     |                 |                 |                                                                                                                                                                                   |
|---------------------------------------------------------------------------------------------------------------------------------------------|----------|----|-----|-----------------|-----------------|-----------------------------------------------------------------------------------------------------------------------------------------------------------------------------------|
|                                                                                                                                             |          |    |     |                 |                 | OR2B6 CLEC4E<br>TNFSF4 HLA-A<br>GNA15 JUNB CCL20<br>CCL3L3 SHISA5<br>KLRD1 RGS10<br>SAMHD1 OR4C45<br>ZNF831 ECT2<br>OR52E8 RASSF3<br>CSH1 GBP2<br>ISG15 MX1 STAT1<br>HERC5 UBE2L6 |
| ISG15 antiviral mechanism                                                                                                                   | REACTOME | 10 | 74  | 9.6383<br>8E-11 | 1.9724<br>4E-08 | DDX58 IFIT1 KPNA2<br>EIF2AK2 MX2                                                                                                                                                  |
| Antiviral mechanism by IFN-stimulated genes antigen processing and presentation of exogenous peptide antigen via MHC class I, TAP-dependent | REACTOME | 10 | 74  | 9.6383<br>8E-11 | 1.9724<br>4E-08 | ISG15 MX1 STAT1<br>HERC5 UBE2L6<br>DDX58 IFIT1 KPNA2<br>EIF2AK2 MX2                                                                                                               |
|                                                                                                                                             | GO       | 10 | 75  | 1.0863<br>1E-10 | 2.1986<br>4E-08 | TAP2 B2M HLA-G<br>PSMB9 FCGR1A<br>TAP1 HLA-C HLA-F<br>HLA-E HLA-A<br>TAP2 B2M HLA-G<br>TAP1 HLA-C<br>UNC93B1 RAB32                                                                |
| phagocytic vesicle                                                                                                                          | GO       | 11 | 104 | 1.2765<br>3E-10 | 2.5555<br>6E-08 | HLA-F HLA-E<br>AMBRA1 HLA-A<br>DDX60 SOCS1<br>STAT1 PLSCR1<br>RSAD2 PSMB9<br>DDX58 TAP1 NMI<br>IFI16 IFIH1 BIRC3<br>UNC93B1 TLR3                                                  |
| regulation of innate immune response regulation of adaptive immune response based on somatic recombination of immune receptors built from   | GO       | 19 | 445 | 1.3707<br>7E-10 | 2.7147<br>1E-08 | LGALS9 HLA-E<br>CLEC4E HLA-A<br>SAMHD1                                                                                                                                            |
|                                                                                                                                             | GO       | 12 | 139 | 1.6825<br>3E-10 | 3.2966<br>9E-08 | TAP2 B2M RSAD2<br>HLA-G FCGR1A<br>TAP1 HLA-C HLA-F<br>IL6 HLA-E TNFSF4<br>HLA-A                                                                                                   |



|                                          |              |    |     |                 |                 |                                                                                                                                                          |
|------------------------------------------|--------------|----|-----|-----------------|-----------------|----------------------------------------------------------------------------------------------------------------------------------------------------------|
|                                          |              |    |     |                 |                 | HERC5 B2M RSAD2                                                                                                                                          |
|                                          |              |    |     |                 |                 | HLA-G PSMB9                                                                                                                                              |
|                                          |              |    |     |                 |                 | FCGR1A CXCL9                                                                                                                                             |
|                                          |              |    |     |                 |                 | DDX58 TAP1 NMI                                                                                                                                           |
|                                          |              |    |     |                 |                 | IFIT1 TRIM22                                                                                                                                             |
|                                          |              |    |     |                 |                 | DYNLT1 KIR2DL3                                                                                                                                           |
|                                          |              |    |     |                 |                 | IFI16 SP100 PML                                                                                                                                          |
|                                          |              |    |     |                 |                 | BCL2A1 IFIH1                                                                                                                                             |
|                                          |              |    |     |                 |                 | ZFP36 RNF213                                                                                                                                             |
|                                          |              |    |     |                 |                 | BIRC3 HLA-C GBP1                                                                                                                                         |
|                                          |              |    |     |                 |                 | UNC93B1 TYROBP                                                                                                                                           |
|                                          |              |    |     |                 |                 | LAIR2 IDO1 TLR3                                                                                                                                          |
|                                          |              |    |     |                 |                 | XCL2 RGS1 TREM2                                                                                                                                          |
|                                          |              |    |     |                 |                 | EIF2AK2 PRAMEF1                                                                                                                                          |
|                                          |              |    |     |                 |                 | CCL4 HLA-F IL6                                                                                                                                           |
|                                          |              |    |     |                 |                 | LGALS9 HLA-E                                                                                                                                             |
|                                          |              |    |     |                 |                 | CASP1 AMBRA1                                                                                                                                             |
|                                          |              |    |     |                 |                 | KIR2DL2 UBD                                                                                                                                              |
|                                          |              |    |     |                 |                 | CLEC4E TNFSF4                                                                                                                                            |
|                                          |              |    |     |                 |                 | HLA-A CCL20                                                                                                                                              |
|                                          |              |    |     |                 |                 | CCL3L3 SHISA5                                                                                                                                            |
|                                          |              |    |     |                 |                 | KLRD1 RGS10                                                                                                                                              |
|                                          |              |    |     |                 |                 | HCST TESPA1                                                                                                                                              |
|                                          |              |    |     |                 |                 | SAMHD1 ECT2                                                                                                                                              |
|                                          |              |    |     |                 |                 | CMPK2 CXCL11                                                                                                                                             |
|                                          |              |    |     |                 |                 | CXCL10 SOCS1                                                                                                                                             |
|                                          |              |    |     |                 |                 | B2M CXCL9 ZFP36                                                                                                                                          |
|                                          |              |    |     |                 |                 | IDO1 TREM2                                                                                                                                               |
|                                          |              |    |     |                 |                 | EIF2AK2 IL6                                                                                                                                              |
|                                          |              |    |     |                 |                 | LGALS9 CASP1                                                                                                                                             |
| response to lipopolysaccharide           | GO           | 16 | 331 | 6.3215<br>8E-10 | 1.1414<br>8E-07 | TNFSF4 JUNB<br>CCL20                                                                                                                                     |
| Endosomal/Vacuolar pathway               | REACTO<br>ME | 6  | 12  | 6.9623<br>E-10  | 1.2449<br>7E-07 | B2M HLA-G HLA-C<br>HLA-F HLA-E HLA-A                                                                                                                     |
| double-stranded RNA binding              | GO           | 9  | 66  | 7.5787<br>7E-10 | 1.3421<br>7E-07 | OASL DDX60 OAS3<br>OAS2 DDX58 OAS1<br>IFIH1 TLR3 EIF2AK2<br>CMPK2 CXCL11<br>CXCL10 SOCS1<br>B2M CXCL9 ZFP36<br>IDO1 TREM2<br>EIF2AK2 IL6<br>LGALS9 CASP1 |
| response to molecule of bacterial origin | GO           | 16 | 345 | 1.1116<br>7E-09 | 1.9499<br>8E-07 | TNFSF4 JUNB<br>CCL20                                                                                                                                     |
| NOD-like receptor signaling pathway      | KEGG         | 12 | 168 | 1.2652<br>E-09  | 2.1777<br>9E-07 | OAS3 STAT1 OAS2<br>OAS1 IRF9 IFI16<br>BIRC3 GBP1 GBP4<br>IL6 CASP1 GBP2                                                                                  |
| Antigen processing-                      | REACTO<br>ME | 10 | 99  | 1.2958<br>E-09  | 2.2098<br>2E-07 | TAP2 B2M HLA-G<br>PSMB9 FCGR1A                                                                                                                           |

|                                                                           |      |    |      |                 |                 |                                                                                                                                                                                                                                                                                                                                                                                                                                                                                                                                                                                             |
|---------------------------------------------------------------------------|------|----|------|-----------------|-----------------|---------------------------------------------------------------------------------------------------------------------------------------------------------------------------------------------------------------------------------------------------------------------------------------------------------------------------------------------------------------------------------------------------------------------------------------------------------------------------------------------------------------------------------------------------------------------------------------------|
| Cross presentation phagocytic vesicle membrane                            | GO   | 9  | 71   | 1.3616<br>8E-09 | 2.3008<br>7E-07 | TAP1 HLA-C HLA-F<br>HLA-E HLA-A<br>TAP2 B2M HLA-G<br>TAP1 HLA-C RAB32<br>HLA-F HLA-E HLA-A<br>MX1 OAS3 STAT1<br>OAS2 DDX58 OAS1                                                                                                                                                                                                                                                                                                                                                                                                                                                             |
| Measles antigen processing and presentation of endogenous peptide antigen | KEGG | 11 | 133  | 1.4254<br>7E-09 | 2.3652<br>6E-07 | IRF9 IFIH1 CCNE1<br>EIF2AK2 IL6                                                                                                                                                                                                                                                                                                                                                                                                                                                                                                                                                             |
| antigen processing and presentation of exogenous peptide antigen          | GO   | 6  | 15   | 2.0040<br>9E-09 | 3.2956<br>5E-07 | TAP2 B2M TAP1<br>HLA-C HLA-E HLA-A                                                                                                                                                                                                                                                                                                                                                                                                                                                                                                                                                          |
| regulation of response to stress                                          | GO   | 34 | 1635 | 3.1274<br>E-09  | 5.0973<br>9E-07 | TAP2 B2M HLA-G<br>PSMB9 FCGR1A<br>IFI30 TAP1 HLA-C<br>UNC93B1 HLA-F<br>HLA-E HLA-A<br>DDX60 SOCS1<br>STAT1 PLSCR1<br>HERC5 B2M RSAD2<br>PSMB9 FCGR1A<br>DDX58 TAP1 NMI<br>IFIT1 IFI16 PML<br>IFIH1 ZFP36 BIRC3<br>UNC93B1 IDO1<br>TLR3 XCL2 EIF2AK2<br>CCL4 IL6 LGALS9<br>HLA-E CASP1<br>AMBRA1 CLEC4E<br>TNFSF4 HLA-A<br>CCL3L3 SAMHD1<br>CXCL11 DDX60<br>CXCL10 PLSCR1<br>TAP2 B2M RSAD2<br>HLA-G PSMB9<br>FCGR1A CXCL9<br>DDX58 TAP1<br>TRIM22 IFI16 PML<br>IFIH1 BIRC3 HLA-C<br>UNC93B1 IDO1<br>TLR3 XCL2 TREM2<br>EIF2AK2 CCL4 HLA-F<br>IL6 LGALS9 HLA-E<br>CASP1 AMBRA1<br>UBD CLEC4E |
| positive regulation of response to stimulus                               | GO   | 42 | 2320 | 3.5785<br>6E-09 | 5.7815<br>7E-07 |                                                                                                                                                                                                                                                                                                                                                                                                                                                                                                                                                                                             |
|                                                                           |      |    |      | 4.0205<br>5E-09 | 6.4391<br>7E-07 |                                                                                                                                                                                                                                                                                                                                                                                                                                                                                                                                                                                             |

|                                                                                |          |    |      |                 |                 |                                                                                                                                                        |
|--------------------------------------------------------------------------------|----------|----|------|-----------------|-----------------|--------------------------------------------------------------------------------------------------------------------------------------------------------|
| antigen processing and presentation                                            | GO       | 13 | 232  | 4.3037<br>5E-09 | 6.8333<br>2E-07 | TNFSF4 HLA-A<br>CCL20 CCL3L3<br>SHISA5 HCST<br>TESPA1 ECT2<br>TAP2 B2M HLA-G<br>PSMB9 FCGR1A<br>IFI30 TAP1 HLA-C<br>UNC93B1 RAB32<br>HLA-F HLA-E HLA-A |
| antigen processing and presentation of exogenous antigen                       | GO       | 12 | 190  | 4.6460<br>2E-09 | 7.3137<br>1E-07 | TAP2 B2M HLA-G<br>PSMB9 FCGR1A<br>IFI30 TAP1 HLA-C<br>UNC93B1 HLA-F<br>HLA-E HLA-A                                                                     |
| ER-Phagosome pathway                                                           | REACTOME | 9  | 83   | 4.7781<br>2E-09 | 7.4579<br>1E-07 | TAP2 B2M HLA-G<br>PSMB9 TAP1 HLA-C<br>HLA-F HLA-E HLA-A                                                                                                |
| antigen processing and presentation of endogenous antigen                      | GO       | 6  | 18   | 4.8951<br>2E-09 | 7.5763<br>3E-07 | TAP2 B2M TAP1<br>HLA-C HLA-E HLA-A                                                                                                                     |
| TAP binding                                                                    | GO       | 5  | 7    | 5.1390<br>7E-09 | 7.8876<br>2E-07 | TAP2 TAP1 HLA-C<br>HLA-F HLA-A                                                                                                                         |
| antigen processing and presentation of peptide antigen                         | GO       | 12 | 196  | 6.4437<br>5E-09 | 9.7279<br>5E-07 | TAP2 B2M HLA-G<br>PSMB9 FCGR1A<br>IFI30 TAP1 HLA-C<br>UNC93B1 HLA-F<br>HLA-E HLA-A<br>HLA-G TAP1<br>KIR2DL3 LILRA2                                     |
| antigen binding                                                                | GO       | 9  | 91   | 1.0016<br>1E-08 | 1.4998<br>E-06  | HLA-C HLA-F HLA-E<br>HLA-A KLRD1<br>CXCL11 CXCL10<br>PLSCR1 FCGR1A<br>CXCL9 NMI IFI16<br>SP100 IDO1 TLR3<br>XCL2 CCL4 IL6                              |
| inflammatory response regulation by virus of viral protein levels in host cell | GO       | 17 | 480  | 1.6111<br>2E-08 | 2.3930<br>4E-06 | LGALS9 TNFSF4<br>CCL20 CCL3L3                                                                                                                          |
| negative regulation of biological process                                      | GO       | 5  | 11   | 2.7786<br>8E-08 | 4.0942<br>2E-06 | STAT1 TAP2 TAP1<br>IFIT1 DYNLT1<br>ISG15 IFITM1 OASL<br>MX1 CXCL10 OAS3                                                                                |
|                                                                                | GO       | 70 | 5225 | 3.3730<br>6E-08 | 4.9305<br>6E-06 | SOCS1 STAT1 IFI6<br>PLSCR1 HERC5                                                                                                                       |

|                                                                                                       |           |    |     |                 |                 |                                                                                                                                                                                                                                                                                                                                                                                                                                                                                                                       |
|-------------------------------------------------------------------------------------------------------|-----------|----|-----|-----------------|-----------------|-----------------------------------------------------------------------------------------------------------------------------------------------------------------------------------------------------------------------------------------------------------------------------------------------------------------------------------------------------------------------------------------------------------------------------------------------------------------------------------------------------------------------|
|                                                                                                       |           |    |     |                 |                 | MDK UBE2L6 IFIT3<br>B2M RSAD2 HLA-G<br>PSMB9 LAMP3 IFI27<br>IFI30 DDX58 OAS1<br>ISG20 WARS TAP1<br>NMI IFIT1 TRIM22<br>DYNLT1 IFI16 ETV7<br>SP100 PML BCL2A1<br>IFIH1 ZFP36<br>RNF213 BIRC3<br>NFKBIE LCMT1<br>GBP1 TRIM31 PGP<br>SRGN EGR2 CCNE1<br>PRTN3 IDO1 TLR3<br>XAF1 RGS1 CD83<br>EIF2AK2 RARRES3<br>PRAMEF1 CCL4 IL6<br>LGALS9 HLA-E<br>PSMG2 AMBRA1<br>TNFSF4 HLA-A<br>JUNB CCL3L3<br>RGS10 SYT4<br>ZNF831 SVBP<br>CXCL11 CXCL10<br>CXCL9 XCL2 CCL4<br>CCL20 CCL3L3<br>B2M HLA-G HLA-C<br>HLA-F HLA-E HLA-A |
| chemokine activity                                                                                    | GO        | 7  | 48  | 3.7565<br>9E-08 | 5.4479<br>5E-06 |                                                                                                                                                                                                                                                                                                                                                                                                                                                                                                                       |
| MHC protein complex antigen processing and presentation of endogenous peptide antigen via MHC class I | GO        | 6  | 27  | 3.8467<br>9E-08 | 5.5351<br>7E-06 |                                                                                                                                                                                                                                                                                                                                                                                                                                                                                                                       |
| Allograft Rejection peptide antigen binding positive regulation of T cell cytokine production         | WikiPathw | 8  | 80  | 5.9915<br>1E-08 | 8.4885<br>9E-06 | TAP2 B2M TAP1<br>HLA-C HLA-A<br>CXCL11 STAT1<br>HLA-G CXCL9 HLA-C<br>HLA-F HLA-E HLA-A                                                                                                                                                                                                                                                                                                                                                                                                                                |
| regulation of cytokine secretion                                                                      | GO        | 5  | 15  | 6.6620<br>6E-08 | 9.3665<br>5E-06 | HLA-G TAP1 HLA-C<br>HLA-F HLA-E HLA-A                                                                                                                                                                                                                                                                                                                                                                                                                                                                                 |
|                                                                                                       | GO        | 10 | 162 | 9.6694<br>6E-08 | 1.3390<br>4E-05 | B2M RSAD2 IL6<br>TNFSF4 HLA-A<br>SOCS1 PML GBP1<br>SRGN CD58 IL6<br>LGALS9 CASP1<br>CLEC4E TNFSF4                                                                                                                                                                                                                                                                                                                                                                                                                     |





|                                                 |          |    |      |                 |                 |                                                                                                                                                                                                                                                                                                                                                                                                                 |
|-------------------------------------------------|----------|----|------|-----------------|-----------------|-----------------------------------------------------------------------------------------------------------------------------------------------------------------------------------------------------------------------------------------------------------------------------------------------------------------------------------------------------------------------------------------------------------------|
| positive regulation of T cell mediated immunity | GO       | 6  | 35   | 1.4991<br>1E-07 | 1.9041<br>7E-05 | B2M RSAD2 IL6<br>HLA-E TNFSF4 HLA-A<br>ISG15 SOCS1<br>HERC5 UBE2L6<br>B2M PSMB9<br>FCGR1A DDX58<br>DYNLT1 IFI16 IFIH1<br>BIRC3 HLA-C<br>ATP6V1F UNC93B1<br>TYROBP PRTN3<br>TLR3 CD58 TREM2<br>HLA-E CASP1                                                                                                                                                                                                       |
| Innate Immune System                            | REACTOME | 26 | 1247 | 1.6215<br>E-07  | 2.0019<br>2E-05 | CLEC4E HLA-A<br>DSN1 KLRD1<br>HLA-G KIR2DL3<br>HLA-C TYROBP                                                                                                                                                                                                                                                                                                                                                     |
| Natural killer cell mediated cytotoxicity       | KEGG     | 9  | 129  | 1.6412<br>8E-07 | 2.0019<br>2E-05 | HLA-E KIR2DL2<br>HLA-A KLRD1 HCST<br>OAS3 STAT1 OAS2                                                                                                                                                                                                                                                                                                                                                            |
| Hepatitis C                                     | KEGG     | 9  | 130  | 1.7454<br>1E-07 | 2.1011<br>1E-05 | DDX58 OAS1 IRF9<br>IFIT1 TLR3 EIF2AK2<br>TAP2 B2M HLA-G<br>FCGR1A TAP1 HLA-C<br>UNC93B1 RAB32                                                                                                                                                                                                                                                                                                                   |
| endocytic vesicle                               | GO       | 12 | 277  | 2.3158<br>2E-07 | 2.7696<br>6E-05 | HLA-F HLA-E<br>AMBRA1 HLA-A<br>ISG15 IFITM1 OASL<br>MX1 CXCL10 OAS3<br>SOCS1 STAT1 IFI6<br>PLSCR1 MDK IFIT3<br>B2M RSAD2 HLA-G<br>PSMB9 LAMP3 IFI27<br>IFI30 OAS1 ISG20<br>WARS NMI IFIT1<br>TRIM22 DYNLT1<br>IFI16 ETV7 SP100<br>PML BCL2A1 ZFP36<br>RNF213 BIRC3<br>NFKBIE LCMT1<br>GBP1 TRIM31 PGP<br>SRGN EGR2 CCNE1<br>PRTN3 IDO1 TLR3<br>XAF1 RGS1<br>EIF2AK2 RARRES3<br>PRAMEF1 CCL4 IL6<br>LGALS9 PSMG2 |
| negative regulation of cellular process         | GO       | 62 | 4693 | 2.4462<br>5E-07 | 2.9067<br>8E-05 | AMBRA1 TNFSF4<br>JUNB CCL3L3                                                                                                                                                                                                                                                                                                                                                                                    |

|               |    |     |       |        |        |                    |
|---------------|----|-----|-------|--------|--------|--------------------|
|               |    |     |       |        |        | RGS10 SYT4         |
|               |    |     |       |        |        | ZNF831 SVBP        |
|               |    |     |       |        |        | ISG15 IFITM1 OASL  |
|               |    |     |       |        |        | CXCL11 MX1 DDX60   |
|               |    |     |       |        |        | IFI35 CXCL10 OAS3  |
|               |    |     |       |        |        | SOCS1 STAT1 IFI6   |
|               |    |     |       |        |        | PLSCR1 TAP2        |
|               |    |     |       |        |        | HERC5 MDK OAS2     |
|               |    |     |       |        |        | UBE2L6 IFIT3 B2M   |
|               |    |     |       |        |        | RSAD2 HLA-G        |
|               |    |     |       |        |        | PSMB9 FCGR1A       |
|               |    |     |       |        |        | LAMP3 IFI27 IFI30  |
|               |    |     |       |        |        | CXCL9 SP110        |
|               |    |     |       |        |        | DDX58 OAS1 ISG20   |
|               |    |     |       |        |        | WARS RNF19B IRF9   |
|               |    |     |       |        |        | TDRD7 TAP1 NMI     |
|               |    |     |       |        |        | IFIT1 TRIM22       |
|               |    |     |       |        |        | DYNLT1 KIR2DL3     |
|               |    |     |       |        |        | OR4C15 IFI16 IFIT2 |
|               |    |     |       |        |        | TYMP ETV7 SP100    |
|               |    |     |       |        |        | PML BCL2A1 LILRA2  |
|               |    |     |       |        |        | TTF2 IFIH1 ZFP36   |
|               |    |     |       |        |        | RNF213 BIRC3       |
|               |    |     |       |        |        | NFKBIE HLA-C       |
|               |    |     |       |        |        | KPNA2 SAMD9L       |
|               |    |     |       |        |        | LCMT1 GBP1         |
|               |    |     |       |        |        | ATP6V1F TRIM31     |
|               |    |     |       |        |        | PGP UNC93B1        |
|               |    |     |       |        |        | RAB32 TYROBP       |
|               |    |     |       |        |        | SRGN EGR2 CCNE1    |
|               |    |     |       |        |        | LAIR2 PRTN3 IDO1   |
|               |    |     |       |        |        | TLR3 XAF1 MELK     |
|               |    |     |       |        |        | XCL2 RGS1 HELZ2    |
|               |    |     |       |        |        | CD58 CD83 TREM2    |
|               |    |     |       |        |        | EIF2AK2 RARRES3    |
|               |    |     |       |        |        | PRAMEF1 CCL4       |
|               |    |     |       |        |        | HLA-F ZNFX1 IL6    |
|               |    |     |       |        |        | LGALS9 HLA-E       |
|               |    |     |       |        |        | CHRNA3 MX2         |
|               |    |     |       |        |        | CASP1 PSMG2        |
|               |    |     |       |        |        | AMBRA1 OR2B6       |
|               |    |     |       |        |        | KIR2DL2 UBD        |
|               |    |     |       |        |        | CLEC4E TNFSF4      |
|               |    |     |       |        |        | HLA-A GNA15 JUNB   |
|               |    |     |       |        |        | CCL20 CCL3L3       |
|               |    |     |       |        |        | SHISA5 KLRD1       |
|               |    |     |       |        |        | RGS10 HCST         |
|               |    |     |       |        |        | TESPA1 SYT4        |
| regulation of |    |     |       | 2.9252 | 3.4324 | SAMHD1 OR4C45      |
| biological    |    |     |       | 2E-07  | 3E-05  | ZNF831 ECT2        |
| process       | GO | 122 | 11240 |        |        |                    |

|                                                    |      |     |       |                 |                 |                                                                                                                                                                                                                                                                                                                                                                                                                                                                                                                |
|----------------------------------------------------|------|-----|-------|-----------------|-----------------|----------------------------------------------------------------------------------------------------------------------------------------------------------------------------------------------------------------------------------------------------------------------------------------------------------------------------------------------------------------------------------------------------------------------------------------------------------------------------------------------------------------|
| regulation of cysteine-type endopeptidase activity | GO   | 11  | 231   | 2.9258<br>9E-07 | 3.4324<br>3E-05 | OR52E8 RASSF3<br>CSH1 GBP2 SVBP<br>IFI6 PSMB9 LAMP3<br>IFI27 IFI16 PML<br>BIRC3 TLR3 IL6<br>LGALS9 CASP1<br>HLA-G TAP1 NMI                                                                                                                                                                                                                                                                                                                                                                                     |
| negative regulation of immune system process       | GO   | 14  | 401   | 3.1005<br>1E-07 | 3.6142<br>5E-05 | IFIT1 IFI16 ZFP36<br>GBP1 IDO1 TLR3<br>EIF2AK2 LGALS9<br>HLA-E TNFSF4 HLA-A                                                                                                                                                                                                                                                                                                                                                                                                                                    |
| Toll-like receptor signaling pathway               | KEGG | 8   | 102   | 3.3957<br>6E-07 | 3.9089<br>4E-05 | CXCL11 CXCL10<br>STAT1 CXCL9 TLR3<br>CCL4 IL6 CCL3L3<br>STAT1 PSMB9                                                                                                                                                                                                                                                                                                                                                                                                                                            |
| cellular response to tumor necrosis factor         | GO   | 11  | 236   | 3.5804<br>8E-07 | 4.0959<br>8E-05 | ZFP36 BIRC3 XCL2<br>CD58 CCL4 IL6<br>TNFSF4 CCL20<br>CCL3L3<br>DDX60 PLSCR1<br>RSAD2 PSMB9                                                                                                                                                                                                                                                                                                                                                                                                                     |
| positive regulation of innate immune response      | GO   | 13  | 348   | 3.8135<br>6E-07 | 4.3356<br>9E-05 | DDX58 IFI16 IFIH1<br>BIRC3 UNC93B1<br>TLR3 LGALS9 HLA-E<br>CLEC4E<br>ISG15 IFITM1 OASL<br>CXCL11 MX1 DDX60<br>IFI35 CXCL10 OAS3<br>SOCS1 STAT1 IFI6<br>PLSCR1 TAP2<br>HERC5 MDK OAS2<br>IFIT3 B2M RSAD2<br>HLA-G PSMB9<br>FCGR1A LAMP3<br>IFI27 IFI30 CXCL9<br>SP110 DDX58 OAS1<br>ISG20 WARS<br>RNF19B IRF9 TAP1<br>NMI IFIT1 TRIM22<br>DYNLT1 OR4C15<br>IFI16 IFIT2 TYMP<br>ETV7 SP100 PML<br>BCL2A1 LILRA2<br>TTF2 IFIH1 ZFP36<br>RNF213 BIRC3<br>NFKBIE HLA-C<br>KPNA2 LCMT1<br>GBP1 ATP6V1F<br>TRIM31 PGP |
| regulation of cellular process                     | GO   | 116 | 10629 | 4.4417<br>6E-07 | 4.9959<br>E-05  |                                                                                                                                                                                                                                                                                                                                                                                                                                                                                                                |

|                                                         |    |    |      |                 |                 |                                                                                                                                                                                                                                                                                                                                                                                                              |
|---------------------------------------------------------|----|----|------|-----------------|-----------------|--------------------------------------------------------------------------------------------------------------------------------------------------------------------------------------------------------------------------------------------------------------------------------------------------------------------------------------------------------------------------------------------------------------|
|                                                         |    |    |      |                 |                 | UNC93B1 RAB32<br>TYROBP SRGN<br>EGR2 CCNE1<br>PRTN3 IDO1 TLR3<br>XAF1 MELK XCL2<br>RGS1 HELZ2 CD58<br>CD83 TREM2<br>EIF2AK2 RARRES3<br>PRAMEF1 CCL4<br>HLA-F ZNFX1 IL6<br>LGALS9 HLA-E<br>CHRNA3 MX2<br>CASP1 PSMG2<br>AMBRA1 OR2B6<br>UBD CLEC4E<br>TNFSF4 HLA-A<br>GNA15 JUNB CCL20<br>CCL3L3 SHISA5<br>KLRD1 RGS10<br>HCST TESPA1 SYT4<br>SAMHD1 OR4C45<br>ZNF831 ECT2<br>OR52E8 RASSF3<br>CSH1 GBP2 SVBP |
| negative regulation of innate immune response           | GO | 6  | 43   | 4.4756<br>4E-07 | 4.9959<br>E-05  | TAP1 NMI IFI16<br>LGALS9 HLA-E HLA-A<br>CXCL11 CXCL10<br>CXCL9 XCL2 CCL20<br>CCL3L3<br>ISG15 STAT1 B2M<br>HLA-G ZFP36<br>TYROBP TLR3 CD83<br>EIF2AK2 IL6                                                                                                                                                                                                                                                     |
| lymphocyte chemotaxis                                   | GO | 6  | 43   | 4.4756<br>4E-07 | 4.9959<br>E-05  | LGALS9 TNFSF4<br>TESPA1<br>ISG15 CXCL10<br>STAT1 HERC5<br>UBE2L6 B2M HLA-G<br>DDX58 NMI DYNLT1<br>SP100 PML IFIH1<br>ZFP36 GBP1 SRGN<br>IDO1 TLR3 CD83 IL6                                                                                                                                                                                                                                                   |
| regulation of hemopoiesis                               | GO | 13 | 355  | 4.7245<br>4E-07 | 5.2419<br>6E-05 | LGALS9 TNFSF4<br>TESPA1<br>ISG15 CXCL10<br>STAT1 HERC5<br>UBE2L6 B2M HLA-G<br>DDX58 NMI DYNLT1<br>SP100 PML IFIH1<br>ZFP36 GBP1 SRGN<br>IDO1 TLR3 CD83 IL6                                                                                                                                                                                                                                                   |
| negative regulation of multicellular organismal process | GO | 24 | 1160 | 5.0187<br>8E-07 | 5.4374<br>1E-05 | LGALS9 TNFSF4<br>SYT4 SVBP                                                                                                                                                                                                                                                                                                                                                                                   |
| negative regulation of type I interferon production     | GO | 6  | 44   | 5.0600<br>7E-07 | 5.4500<br>8E-05 | ISG15 HERC5<br>UBE2L6 DDX58 NMI<br>IFIH1                                                                                                                                                                                                                                                                                                                                                                     |

|                                      |    |     |       |                 |                 |                                                                                                                                                                                                                                                                                                                                                                                                                                                                                                                                                                                                                                                                                                                                                                                                                                                                                           |
|--------------------------------------|----|-----|-------|-----------------|-----------------|-------------------------------------------------------------------------------------------------------------------------------------------------------------------------------------------------------------------------------------------------------------------------------------------------------------------------------------------------------------------------------------------------------------------------------------------------------------------------------------------------------------------------------------------------------------------------------------------------------------------------------------------------------------------------------------------------------------------------------------------------------------------------------------------------------------------------------------------------------------------------------------------|
| chemokine-mediated signaling pathway | GO | 7   | 73    | 5.1592<br>6E-07 | 5.5246<br>E-05  | CXCL11 CXCL10<br>CXCL9 XCL2 CCL4<br>CCL20 CCL3L3<br>ISG15 IFITM1 OASL<br>CXCL11 MX1 DDX60<br>IFI35 CXCL10 OAS3<br>SOCS1 STAT1 RTP4<br>IFI6 PLSCR1 TAP2<br>HERC5 MDK OAS2<br>UBE2L6 TRIM69<br>IFIT3 B2M RSAD2<br>HLA-G PSMB9<br>FCGR1A IFI27 IFI30<br>CXCL9 DDX58 OAS1<br>WARS RNF19B IRF9<br>TDRD7 TAP1<br>CENPW NMI IFIT1<br>TRIM22 DYNLT1<br>KIR2DL3 IFI16 IFIT2<br>TYMP ETV7 SP100<br>PML BCL2A1 TTF2<br>IFIH1 ZFP36 RPL39L<br>RNF213 BIRC3<br>NFKBIE HLA-C<br>KPNA2 NCAPG<br>SAMD9L LCMT1<br>GBP1 SAMD9<br>ATP6V1F TRIM31<br>UNC93B1 RAB32<br>TYROBP SRGN<br>APOL6 EGR2<br>CCNE1 LAIR2<br>PRTN3 TLR3 ORAI2<br>MELK XCL2 RGS1<br>SYNGR2 HELZ2<br>CD58 TREM2<br>EIF2AK2 RARRES3<br>PRAMEF1 CCL4<br>VAMP5 HLA-F IL6<br>LGALS9 HLA-E<br>CHRNA3 MX2<br>CASP1 PSMG2<br>AMBRA1 UBD<br>TNFSF4 HLA-A<br>GNA15 JUNB<br>SPRR2A CCL20<br>CCL3L3 DSN1<br>SHISA5 KLRD1<br>RGS10 HCST<br>TESPA1 SYT4 |
| protein binding                      | GO | 117 | 10853 | 5.4961<br>7E-07 | 5.8177<br>3E-05 |                                                                                                                                                                                                                                                                                                                                                                                                                                                                                                                                                                                                                                                                                                                                                                                                                                                                                           |

|                                                         |      |     |      |                 |                 |                                                                                                                                                     |
|---------------------------------------------------------|------|-----|------|-----------------|-----------------|-----------------------------------------------------------------------------------------------------------------------------------------------------|
|                                                         |      |     |      |                 |                 | SAMHD1 ECT2<br>RASSF3 CSH1<br>GBP2<br>HLA-G IRF9 SP100<br>HLA-C EGR2 CCNE1<br>EIF2AK2 HLA-F<br>HLA-E HLA-A                                          |
| Viral carcinogenesis                                    | KEGG | 10  | 198  | 5.9056<br>1E-07 | 6.1106<br>5E-05 |                                                                                                                                                     |
| regulation of T cell cytokine production                | GO   | 5   | 23   | 5.8917<br>8E-07 | 6.1106<br>5E-05 | B2M RSAD2 IL6<br>TNFSF4 HLA-A                                                                                                                       |
| response to interferon-beta                             | GO   | 5   | 23   | 5.8917<br>8E-07 | 6.1106<br>5E-05 | IFITM1 STAT1<br>PLSCR1 TLR3 XAF1<br>TAP2 HLA-G<br>FCGR1A TAP1 HLA-C<br>ATP6V1F HLA-F<br>HLA-E HLA-A                                                 |
| Phagosome positive regulation of T cell differentiation | KEGG | 9   | 153  | 6.3513<br>5E-07 | 6.4988<br>4E-05 |                                                                                                                                                     |
|                                                         | GO   | 7   | 76   | 6.6381<br>6E-07 | 6.7547<br>9E-05 | SOCS1 HLA-G CD83<br>IL6 LGALS9 TNFSF4<br>TESPA1<br>SOCS1 RSAD2 IFI27<br>DDX58 SP100 PML<br>NFKBIE GBP1<br>SRGN TLR3 CD58<br>IL6 LGALS9 HLA-E        |
| regulation of protein transport                         | GO   | 19  | 787  | 7.5687<br>4E-07 | 7.6594<br>E-05  | CASP1 CLEC4E<br>TNFSF4 SYT4 ECT2<br>SOCS1 RSAD2 IFI27<br>DDX58 TRIM22<br>SP100 PML NFKBIE<br>GBP1 SRGN CCNE1<br>TLR3 CD58 TREM2<br>IL6 LGALS9 HLA-E |
| regulation of protein localization                      | GO   | 22  | 1027 | 7.9875<br>9E-07 | 7.9954<br>E-05  | CASP1 CLEC4E<br>TNFSF4 SYT4 ECT2                                                                                                                    |
| regulation of type I interferon production              | GO   | 8   | 116  | 8.4685<br>6E-07 | 8.4310<br>2E-05 | ISG15 HERC5<br>UBE2L6 DDX58 NMI<br>IFI16 IFIH1 TLR3<br>TAP1 NMI IFIT1<br>IFI16 ZFP36                                                                |
| negative regulation of defense response                 | GO   | 9   | 161  | 9.4879<br>6E-07 | 9.3951<br>2E-05 | EIF2AK2 LGALS9<br>HLA-E HLA-A<br>ISG15 OASL CMPK2<br>HERC6 MX1 DDX60<br>IFI35 OAS3 SOCS1<br>STAT1 IFI6 PLSCR1<br>TAP2 HERC5 PPA1<br>OAS2 UBE2L6     |
| cytoplasmic part                                        | GO   | 102 | 9320 | 9.5708<br>2E-07 | 9.4264<br>9E-05 | TRIM69 IFIT3 B2M<br>SLC15A3 RSAD2                                                                                                                   |





|                                                              |    |     |       |                 |                 |                                                                                                                                                                                                                                                                                                                                                                                                                                                                                                                                                                                                                                                                                                                                                                                                                                                                                             |
|--------------------------------------------------------------|----|-----|-------|-----------------|-----------------|---------------------------------------------------------------------------------------------------------------------------------------------------------------------------------------------------------------------------------------------------------------------------------------------------------------------------------------------------------------------------------------------------------------------------------------------------------------------------------------------------------------------------------------------------------------------------------------------------------------------------------------------------------------------------------------------------------------------------------------------------------------------------------------------------------------------------------------------------------------------------------------------|
| positive<br>regulation of<br>alpha-beta T<br>cell activation | GO | 6   | 53    | 1.3704<br>1E-06 | 0.0001<br>32148 | CD83 IL6 LGALS9<br>HLA-E TNFSF4 HLA-<br>A<br>ISG15 IFITM1 OASL<br>CMPK2 HERC6<br>CXCL11 MX1 IFI35<br>CXCL10 OAS3<br>SOCS1 STAT1 RTP4<br>IFI6 PLSCR1 TAP2<br>HERC5 PPA1 MDK<br>OAS2 UBE2L6<br>TRIM69 IFIT3 B2M<br>SLC15A3 RSAD2<br>HLA-G PSMB9<br>FCGR1A LAMP3<br>IFI27 IFI30 CXCL9<br>SP110 DDX58 OAS1<br>ISG20 WARS<br>RNF19B IRF9<br>TDRD7 TAP1<br>CENPW NMI IFIT1<br>TRIM22 DYNLT1<br>OR4C15 IFI16 IFIT2<br>TYMP ETV7 SP100<br>PML BCL2A1 LILRA2<br>TTF2 IFIH1 ZFP36<br>MSRA RNF213<br>BIRC3 NFKBIE HLA-<br>C KPNA2 NCAPG<br>SAMD9L UQCRHL<br>NT5C3A MRPS18C<br>LCMT1 GBP1<br>SAMD9 GBP4<br>ATP6V1F TRIM31<br>PGP UNC93B1<br>RAB32 TYROBP<br>SRGN EGR2 CCNE1<br>PRTN3 IDO1 TLR3<br>XAF1 ORAI2 MELK<br>XCL2 RGS1<br>SYNGR2 HELZ2<br>CD58 CD83 TREM2<br>EIF2AK2 RARRES3<br>CCL4 VAMP5 HLA-F<br>IL6 LGALS9 HLA-E<br>CHRNA3 MX2<br>CASP1 PSMG2<br>AMBRA1 OR2B6<br>UBD CLEC4E<br>TNFSF4 HLA-A |
| single-<br>organism<br>cellular<br>process                   | GO | 133 | 12938 | 1.3881<br>2E-06 | 0.0001<br>33158 |                                                                                                                                                                                                                                                                                                                                                                                                                                                                                                                                                                                                                                                                                                                                                                                                                                                                                             |

|                                                       |    |     |       |                 |                 |                                                                                                                                                                                                                                                                                                                                                                                                                                                                                                                                                                                                                                                                           |
|-------------------------------------------------------|----|-----|-------|-----------------|-----------------|---------------------------------------------------------------------------------------------------------------------------------------------------------------------------------------------------------------------------------------------------------------------------------------------------------------------------------------------------------------------------------------------------------------------------------------------------------------------------------------------------------------------------------------------------------------------------------------------------------------------------------------------------------------------------|
|                                                       |    |     |       |                 |                 | GNA15 JUNB<br>SPRR2A CCL20<br>CCL3L3 DSN1<br>SHISA5 KLRD1<br>RGS10 SYT4<br>SAMHD1 OR4C45<br>ZNF831 ECT2<br>OR52E8 RASSF3<br>CSH1 GBP2 SVBP<br>ISG15 IFITM1<br>CXCL11 DDX60<br>CXCL10 SOCS1<br>STAT1 PLSCR1<br>TAP2 MDK B2M<br>RSAD2 HLA-G<br>PSMB9 FCGR1A<br>LAMP3 IFI27 CXCL9<br>DDX58 WARS<br>RNF19B TAP1 NMI<br>IFIT1 TRIM22 IFI16<br>IFIT2 SP100 PML<br>BCL2A1 IFIH1<br>ZFP36 BIRC3 HLA-C<br>TRIM31 UNC93B1<br>EGR2 CCNE1<br>PRTN3 IDO1 TLR3<br>MELK XCL2 RGS1<br>HELZ2 CD58 CD83<br>TREM2 EIF2AK2<br>PRAMEF1 CCL4<br>HLA-F IL6 LGALS9<br>HLA-E CHRNA3<br>CASP1 AMBRA1<br>UBD CLEC4E<br>TNFSF4 HLA-A<br>JUNB CCL20<br>CCL3L3 SHISA5<br>RGS10 HCST<br>TESPA1 SYT4 ECT2 |
| positive<br>regulation of<br>biological<br>process    | GO | 71  | 5953  | 1.4343<br>1E-06 | 0.0001<br>36393 |                                                                                                                                                                                                                                                                                                                                                                                                                                                                                                                                                                                                                                                                           |
| positive<br>regulation of<br>inflammatory<br>response | GO | 8   | 125   | 1.4366<br>5E-06 | 0.0001<br>36393 | FCGR1A IDO1 TLR3<br>XCL2 CCL4 IL6<br>TNFSF4 CCL3L3<br>CXCL11 CXCL10                                                                                                                                                                                                                                                                                                                                                                                                                                                                                                                                                                                                       |
| leukocyte<br>chemotaxis                               | GO | 8   | 126   | 1.5197<br>6E-06 | 0.0001<br>43543 | CXCL9 XCL2 CCL4<br>IL6 CCL20 CCL3L3<br>ISG15 IFITM1 OASL<br>CXCL11 MX1 DDX60<br>IFI35 CXCL10 OAS3                                                                                                                                                                                                                                                                                                                                                                                                                                                                                                                                                                         |
| biological<br>regulation                              | GO | 123 | 11844 | 1.6210<br>2E-06 | 0.0001<br>50788 | SOCS1 STAT1 IFI6<br>PLSCR1 TAP2                                                                                                                                                                                                                                                                                                                                                                                                                                                                                                                                                                                                                                           |

HERC5 MDK OAS2  
 UBE2L6 IFIT3 B2M  
 RSAD2 HLA-G  
 PSMB9 FCGR1A  
 LAMP3 IFI27 IFI30  
 CXCL9 SP110  
 DDX58 OAS1 ISG20  
 WARS RNF19B IRF9  
 TDRD7 TAP1 NMI  
 IFIT1 TRIM22  
 DYNLT1 KIR2DL3  
 OR4C15 IFI16 IFIT2  
 TYMP ETV7 SP100  
 PML BCL2A1 LILRA2  
 TTF2 IFIH1 ZFP36  
 RNF213 BIRC3  
 NFKBIE HLA-C  
 KPNA2 SAMD9L  
 LCMT1 GBP1  
 ATP6V1F TRIM31  
 PGP UNC93B1  
 RAB32 TYROBP  
 SRGN EGR2 CCNE1  
 LAIR2 PRTN3 IDO1  
 TLR3 XAF1 MELK  
 XCL2 RGS1 HELZ2  
 CD58 CD83 TREM2  
 EIF2AK2 RARRES3  
 PRAMEF1 CCL4  
 VAMP5 HLA-F  
 ZNFX1 IL6 LGALS9  
 HLA-E CHRNA3 MX2  
 CASP1 PSMG2  
 AMBRA1 OR2B6  
 KIR2DL2 UBD  
 CLEC4E TNFSF4  
 HLA-A GNA15 JUNB  
 CCL20 CCL3L3  
 SHISA5 KLRD1  
 RGS10 HCST  
 TESPA1 SYT4  
 SAMHD1 OR4C45  
 ZNF831 ECT2  
 OR52E8 RASSF3  
 CSH1 GBP2 SVBP

integral  
 component of  
 luminal side of  
 endoplasmic  
 reticulum  
 membrane

GO

5

29

1.6194  
2E-060.0001  
50788

HLA-G HLA-C HLA-F  
 HLA-E HLA-A

|                                                          |      |    |      |                 |                 |                                                                                                                                                                                                      |
|----------------------------------------------------------|------|----|------|-----------------|-----------------|------------------------------------------------------------------------------------------------------------------------------------------------------------------------------------------------------|
| luminal side of endoplasmic reticulum membrane           | GO   | 5  | 29   | 1.6194<br>2E-06 | 0.0001<br>50788 | HLA-G HLA-C HLA-F<br>HLA-E HLA-A                                                                                                                                                                     |
| positive regulation of lymphocyte differentiation        | GO   | 7  | 88   | 1.6594<br>E-06  | 0.0001<br>53582 | SOCS1 HLA-G CD83<br>IL6 LGALS9 TNFSF4<br>TESPA1<br>SOCS1 STAT1<br>FCGR1A IRF9                                                                                                                        |
| Osteoclast differentiation                               | KEGG | 8  | 128  | 1.6983<br>E-06  | 0.0001<br>55618 | LILRA2 TYROBP<br>TREM2 JUNB                                                                                                                                                                          |
| positive regulation of leukocyte migration               | GO   | 8  | 129  | 1.7940<br>5E-06 | 0.0001<br>63578 | CXCL11 CXCL10<br>CXCL9 XCL2 CCL4<br>IL6 LGALS9 CCL20<br>CXCL11 CXCL10                                                                                                                                |
| lymphocyte migration                                     | GO   | 6  | 56   | 1.8413<br>8E-06 | 0.0001<br>67066 | CXCL9 XCL2 CCL20<br>CCL3L3                                                                                                                                                                           |
| negative regulation of immune response                   | GO   | 8  | 130  | 1.8943<br>5E-06 | 0.0001<br>7103  | HLA-G TAP1 NMI<br>IFI16 LGALS9 HLA-E<br>TNFSF4 HLA-A<br>SOCS1 RSAD2 IFI27<br>DDX58 SP100 PML<br>NFKBIE GBP1<br>SRGN TLR3 CD58<br>IL6 LGALS9 HLA-E                                                    |
| regulation of peptide transport                          | GO   | 19 | 842  | 1.9458<br>7E-06 | 0.0001<br>74825 | CASP1 CLEC4E<br>TNFSF4 SYT4 ECT2<br>CXCL11 DDX60<br>CXCL10 CXCL9<br>TRIM22 BIRC3 TLR3<br>XCL2 TREM2<br>EIF2AK2 CCL4 IL6<br>LGALS9 CASP1                                                              |
| positive regulation of intracellular signal transduction | GO   | 20 | 927  | 2.0928<br>7E-06 | 0.0001<br>87119 | UBD CCL20 CCL3L3<br>SHISA5 HCST ECT2<br>ISG15 IFITM1<br>DDX60 STAT1 B2M<br>RSAD2 HLA-G<br>DDX58 IFI16 PML<br>IFIH1 IDO1 TLR3<br>CD58 CD83 EIF2AK2<br>CCL4 IL6 LGALS9<br>HLA-E CASP1<br>CLEC4E TNFSF4 |
| positive regulation of multicellular organismal process  | GO   | 28 | 1626 | 2.1336<br>6E-06 | 0.0001<br>89844 | HLA-A CCL20<br>TESPA1 SYT4 ECT2                                                                                                                                                                      |

|                                                                                                     |    |    |      |                 |                 |                                                                                                                                                                                                                                 |
|-----------------------------------------------------------------------------------------------------|----|----|------|-----------------|-----------------|---------------------------------------------------------------------------------------------------------------------------------------------------------------------------------------------------------------------------------|
| regulation of apoptotic process                                                                     | GO | 26 | 1446 | 2.1823<br>8E-06 | 0.0001<br>93245 | STAT1 IFI6 MDK<br>IFIT3 LAMP3 IFI27<br>IFIT2 SP100 PML<br>BCL2A1 ZFP36<br>BIRC3 LCMT1 IDO1<br>TLR3 MELK<br>EIF2AK2 PRAMEF1<br>IL6 LGALS9 CASP1<br>PSMG2 AMBRA1<br>UBD ECT2 RASSF3<br>TAP2 FCGR1A<br>LAMP3 RNF19B<br>TAP1 LILRA2 |
| adaptive immune response ER to Golgi transport vesicle membrane                                     | GO | 11 | 287  | 2.2120<br>2E-06 | 0.0001<br>94933 | HMHB1 UNC93B1<br>IL6 HLA-E TNFSF4                                                                                                                                                                                               |
| pyrophosphatase activity                                                                            | GO | 6  | 58   | 2.2229<br>9E-06 | 0.0001<br>94967 | B2M HLA-G HLA-C<br>HLA-F HLA-E HLA-A<br>MX1 DDX60 TAP2<br>PPA1 DDX58 TAP1<br>DYNLT1 TTF2 IFIH1<br>RNF213 GBP1 GBP4<br>ATP6V1F RAB32                                                                                             |
| side of membrane hydrolase activity, acting on acid anhydrides, in phosphorus-containing anhydrides | GO | 19 | 851  | 2.2535<br>3E-06 | 0.0001<br>96709 | TRANK1 HELZ2 MX2<br>GNA15 GBP2<br>CXCL10 B2M HLA-G<br>FCGR1A CXCL9<br>HLA-C RGS1 CD83<br>HLA-F IL6 HLA-E<br>HLA-A GNA15                                                                                                         |
| side of membrane hydrolase activity, acting on acid anhydrides, in phosphorus-containing anhydrides | GO | 14 | 479  | 2.2950<br>9E-06 | 0.0001<br>99392 | KLRD1<br>MX1 DDX60 TAP2<br>PPA1 DDX58 TAP1<br>DYNLT1 TTF2 IFIH1<br>RNF213 GBP1 GBP4<br>ATP6V1F RAB32                                                                                                                            |
| hydrolase activity, acting on acid anhydrides                                                       | GO | 19 | 853  | 2.3276<br>E-06  | 0.0002<br>01267 | TRANK1 HELZ2 MX2<br>GNA15 GBP2<br>MX1 DDX60 TAP2<br>PPA1 DDX58 TAP1<br>DYNLT1 TTF2 IFIH1<br>RNF213 GBP1 GBP4<br>ATP6V1F RAB32                                                                                                   |
| cell surface                                                                                        | GO | 19 | 855  | 2.4038<br>7E-06 | 0.0002<br>06596 | TRANK1 HELZ2 MX2<br>GNA15 GBP2<br>CXCL10 RTP4 B2M<br>CXCL9 HLA-C<br>TYROBP TLR3 CD58<br>CD83 VAMP5 HLA-F                                                                                                                        |
| cell surface                                                                                        | GO | 18 | 776  | 2.4116<br>7E-06 | 0.0002<br>06596 | IL6 HLA-E TNFSF4                                                                                                                                                                                                                |

|                                                                                                                               |           |    |      |                 |                 |                                                                                                                                                                                                                                                                    |
|-------------------------------------------------------------------------------------------------------------------------------|-----------|----|------|-----------------|-----------------|--------------------------------------------------------------------------------------------------------------------------------------------------------------------------------------------------------------------------------------------------------------------|
| regulation of protein secretion                                                                                               | GO        | 13 | 415  | 2.4716<br>8E-06 | 0.0002<br>10757 | HLA-A KLRD1 HCST<br>ECT2<br>SOCS1 RSAD2 PML<br>GBP1 SRGN CD58<br>IL6 LGALS9 HLA-E<br>CASP1 CLEC4E<br>TNFSF4 SYT4<br>STAT1 IFI6 MDK<br>IFIT3 LAMP3 IFI27<br>IFIT2 SP100 PML<br>BCL2A1 ZFP36<br>BIRC3 LCMT1 IDO1<br>TLR3 MELK<br>EIF2AK2 PRAMEF1<br>IL6 LGALS9 CASP1 |
| regulation of programmed cell death recycling endosome membrane                                                               | GO        | 26 | 1462 | 2.63E-<br>06    | 0.0002<br>22199 | PSMG2 AMBRA1<br>UBD ECT2 RASSF3                                                                                                                                                                                                                                    |
| regulation of establishment of protein localization positive regulation of interleukin-12 production lumenal side of membrane | GO        | 6  | 60   | 2.6666<br>7E-06 | 0.0002<br>24268 | B2M HLA-G HLA-C<br>HLA-F HLA-E HLA-A<br>SOCS1 RSAD2 IFI27<br>DDX58 SP100 PML<br>NFKBIE GBP1<br>SRGN TLR3 CD58<br>IL6 LGALS9 HLA-E<br>CASP1 CLEC4E<br>TNFSF4 SYT4 ECT2                                                                                              |
| regulation of cell death                                                                                                      | GO        | 19 | 866  | 2.8651<br>3E-06 | 0.0002<br>37702 | HLA-G IDO1 TLR3<br>LGALS9 TNFSF4                                                                                                                                                                                                                                   |
| Regulation of toll-like receptor signaling pathway                                                                            | WikiPathw | 5  | 33   | 2.8641<br>7E-06 | 0.0002<br>37702 | HLA-G HLA-C HLA-F<br>HLA-E HLA-A<br>STAT1 IFI6 MDK<br>IFIT3 LAMP3 IFI27<br>IFIT2 SP100 PML<br>BCL2A1 ZFP36<br>BIRC3 LCMT1 IDO1<br>TLR3 MELK<br>EIF2AK2 PRAMEF1<br>IL6 LGALS9 CASP1<br>PSMG2 AMBRA1<br>UBD JUNB ECT2<br>RASSF3                                      |
|                                                                                                                               |           | 5  | 33   | 2.8641<br>7E-06 | 0.0002<br>37702 | HLA-G HLA-C HLA-F<br>HLA-E HLA-A<br>STAT1 IFI6 MDK<br>IFIT3 LAMP3 IFI27<br>IFIT2 SP100 PML<br>BCL2A1 ZFP36<br>BIRC3 LCMT1 IDO1<br>TLR3 MELK<br>EIF2AK2 PRAMEF1<br>IL6 LGALS9 CASP1<br>PSMG2 AMBRA1<br>UBD JUNB ECT2<br>RASSF3                                      |
|                                                                                                                               |           | 27 | 1570 | 3.1709<br>6E-06 | 0.0002<br>61895 | RASSF3                                                                                                                                                                                                                                                             |
|                                                                                                                               |           | 8  | 140  | 3.1887<br>E-06  | 0.0002<br>62185 | CXCL11 CXCL10<br>SOCS1 STAT1<br>CXCL9 TLR3 CCL4<br>IL6                                                                                                                                                                                                             |

|                                                                        |           |    |     |                 |                 |                                                                                                                                  |
|------------------------------------------------------------------------|-----------|----|-----|-----------------|-----------------|----------------------------------------------------------------------------------------------------------------------------------|
| Negative regulators of RIG-I/MDA5 signaling                            | REACTOME  | 5  | 34  | 3.2692<br>1E-06 | 0.0002<br>6761  | ISG15 HERC5<br>UBE2L6 DDX58<br>IFIH1<br>MX1 TAP2 TAP1<br>BCL2A1 SAMD9L                                                           |
| membrane fusion                                                        | GO        | 9  | 190 | 3.4562<br>8E-06 | 0.0002<br>81672 | SAMD9 VAMP5 MX2<br>SYT4                                                                                                          |
| Toll-like Receptor Signaling Pathway                                   | WikiPathw | 7  | 100 | 3.6783<br>5E-06 | 0.0002<br>98449 | CXCL11 CXCL10<br>STAT1 CXCL9 TLR3<br>CCL4 IL6                                                                                    |
| Proteasome Degradation                                                 | WikiPathw | 6  | 64  | 3.7706<br>6E-06 | 0.0003<br>04597 | HLA-G PSMB9 HLA-C<br>HLA-F HLA-E HLA-A<br>MX1 DDX60 TAP2<br>DDX58 TAP1<br>DYNLT1 TTF2 IFIH1<br>RNF213 GBP1 GBP4<br>ATP6V1F RAB32 |
| nucleoside-triphosphatase activity                                     | GO        | 18 | 807 | 4.0398<br>4E-06 | 0.0003<br>23503 | TRANK1 HELZ2 MX2<br>GNA15 GBP2<br>DDX60 HERC5 B2M<br>DDX58 IFIT1 PML                                                             |
| regulation of defense response to virus                                | GO        | 9  | 195 | 4.2254<br>6E-06 | 0.0003<br>31168 | BIRC3 EIF2AK2<br>HLA-A                                                                                                           |
| positive regulation of cytokine production involved in immune response | GO        | 5  | 36  | 4.2134<br>1E-06 | 0.0003<br>31168 | B2M RSAD2 IL6<br>TNFSF4 HLA-A                                                                                                    |
| regulation of cytokine production involved in immune response          | GO        | 6  | 66  | 4.4476<br>8E-06 | 0.0003<br>47107 | B2M RSAD2 TLR3<br>IL6 TNFSF4 HLA-A<br>CXCL11 CXCL10<br>IFI27 CXCL9 DDX58<br>SP100 PML ZFP36<br>NFKBIE GBP1<br>CCNE1 TLR3         |
| regulation of cellular localization                                    | GO        | 19 | 901 | 4.9127<br>E-06  | 0.0003<br>80863 | TREM2 IL6 LGALS9<br>CHRNA3 MX2 SYT4<br>ECT2<br>HLA-G DDX58<br>NFKBIE HLA-C                                                       |
| Epstein-Barr virus infection                                           | KEGG      | 9  | 199 | 4.9422<br>4E-06 | 0.0003<br>80863 | CD58 EIF2AK2 HLA-F<br>HLA-E HLA-A                                                                                                |

|                                                        |      |    |      |                 |                 |                                                                                                                                                            |
|--------------------------------------------------------|------|----|------|-----------------|-----------------|------------------------------------------------------------------------------------------------------------------------------------------------------------|
| Allograft rejection                                    | KEGG | 5  | 38   | 5.3590<br>2E-06 | 0.0004<br>07862 | HLA-G HLA-C HLA-F<br>HLA-E HLA-A<br>FCGR1A ZFP36<br>BIRC3 IDO1 TLR3                                                                                        |
| regulation of inflammatory response                    | GO   | 11 | 321  | 6.1334<br>8E-06 | 0.0004<br>64882 | XCL2 CCL4 IL6<br>CASP1 TNFSF4<br>CCL3L3<br>CMPK2 CXCL11<br>CXCL10 SOCS1<br>MDK B2M CXCL9<br>SP100 ZFP36<br>CCNE1 IDO1 TREM2<br>EIF2AK2 IL6<br>LGALS9 CASP1 |
| response to lipid                                      | GO   | 19 | 920  | 6.5066<br>2E-06 | 0.0004<br>91143 | TNFSF4 JUNB<br>CCL20<br>CXCL11 CXCL10                                                                                                                      |
| regulation of leukocyte chemotaxis                     | GO   | 7  | 111  | 7.0231<br>8E-06 | 0.0005<br>25825 | CXCL9 XCL2 CCL4<br>IL6 LGALS9<br>B2M SLC15A3 HLA-G<br>FCGR1A LAMP3<br>IFI30 RNF19B PML<br>HLA-C ATP6V1F<br>UNC93B1 RAB32<br>SRGN PRTN3 TLR3<br>HLA-F HLA-E |
| vacuole negative regulation of immune effector process | GO   | 20 | 1011 | 7.0988<br>3E-06 | 0.0005<br>29337 | AMBRA1 HLA-A<br>DSN1                                                                                                                                       |
| negative regulation of protein transport               | GO   | 9  | 210  | 7.4234<br>5E-06 | 0.0005<br>52765 | TAP1 IFIT1 EIF2AK2<br>LGALS9 HLA-E<br>TNFSF4 HLA-A<br>RSAD2 SP100 PML<br>NFKBIE GBP1                                                                       |
| monocyte chemotaxis                                    | GO   | 5  | 41   | 7.4730<br>9E-06 | 0.0005<br>53968 | SRGN IL6 TNFSF4<br>SYT4<br>XCL2 CCL4 IL6<br>CCL20 CCL3L3                                                                                                   |
| negative regulation of protein secretion               | GO   | 7  | 114  | 7.5193<br>3E-06 | 0.0005<br>07627 | RSAD2 PML GBP1<br>SRGN IL6 TNFSF4<br>SYT4<br>SOCS1 HLA-G CD83                                                                                              |
| positive regulation of T cell activation               | GO   | 9  | 213  | 8.3301<br>8E-06 | 0.0006<br>08831 | IL6 LGALS9 HLA-E<br>TNFSF4 HLA-A<br>TESPA1<br>CXCL11 CXCL10                                                                                                |
| cytokine receptor binding                              | GO   | 10 | 272  | 8.7631<br>1E-06 | 0.0006<br>3794  | STAT1 CXCL9 XCL2<br>CCL4 IL6 TNFSF4<br>CCL20 CCL3L3                                                                                                        |



|                                                                                                            |    |     |       |                 |                 |                                                                                                                                                                                                                                                                                                                                                                                                                          |
|------------------------------------------------------------------------------------------------------------|----|-----|-------|-----------------|-----------------|--------------------------------------------------------------------------------------------------------------------------------------------------------------------------------------------------------------------------------------------------------------------------------------------------------------------------------------------------------------------------------------------------------------------------|
| regulation of molecular function                                                                           | GO | 43  | 3257  | 8.8369<br>7E-06 | 0.0006<br>40784 | CXCL10 OAS3<br>SOCS1 STAT1 IFI6<br>PLSCR1 HERC5<br>B2M PSMB9 LAMP3<br>IFI27 DDX58 OAS1<br>WARS IFIT1 TRIM22<br>DYNLT1 IFI16 IFIT2<br>SP100 PML ZFP36<br>BIRC3 LCMT1<br>TRIM31 CCNE1<br>TLR3 XCL2 RGS1<br>EIF2AK2 CCL4 IL6<br>LGALS9 CHRNA3<br>CASP1 PSMG2<br>AMBRA1 TNFSF4<br>GNA15 CCL20<br>CCL3L3 RGS10<br>ECT2<br>HERC6 B2M RSAD2<br>PSMB9 IFI16 PML<br>PRTN3 MELK<br>TREM2 IL6 LGALS9<br>UBD CLEC4E<br>TNFSF4 JUNB   |
| immune system development regulation of cysteine-type endopeptidase activity involved in apoptotic process | GO | 15  | 618   | 8.9527<br>7E-06 | 0.0006<br>4411  | IFI6 LAMP3 IFI27<br>PML BIRC3 TLR3 IL6<br>LGALS9 CASP1<br>ISG15 IFITM1 OASL<br>CMPK2 HERC6<br>CXCL11 MX1 IFI35<br>CXCL10 OAS3<br>SOCS1 STAT1 RTP4<br>IFI6 PLSCR1 TAP2<br>HERC5 PPA1 MDK<br>OAS2 UBE2L6<br>TRIM69 IFIT3 B2M<br>SLC15A3 RSAD2<br>HLA-G PSMB9<br>FCGR1A LAMP3<br>IFI27 IFI30 CXCL9<br>SP110 DDX58 OAS1<br>ISG20 WARS<br>RNF19B IRF9<br>TDRD7 TAP1<br>CENPW NMI IFIT1<br>TRIM22 DYNLT1<br>OR4C15 IFI16 IFIT2 |
| single-organism process                                                                                    | GO | 135 | 13821 | 9.1463<br>8E-06 | 0.0006<br>52938 |                                                                                                                                                                                                                                                                                                                                                                                                                          |

|                                                   |      |    |     |                 |                 |                                                  |
|---------------------------------------------------|------|----|-----|-----------------|-----------------|--------------------------------------------------|
|                                                   |      |    |     |                 |                 | TYMP ETV7 SP100                                  |
|                                                   |      |    |     |                 |                 | PML BCL2A1 LILRA2                                |
|                                                   |      |    |     |                 |                 | TTF2 IFIH1 ZFP36                                 |
|                                                   |      |    |     |                 |                 | RPL39L MSRA                                      |
|                                                   |      |    |     |                 |                 | RNF213 BIRC3                                     |
|                                                   |      |    |     |                 |                 | NFKBIE HLA-C                                     |
|                                                   |      |    |     |                 |                 | KPNA2 NCAPG                                      |
|                                                   |      |    |     |                 |                 | SAMD9L UQCRHL                                    |
|                                                   |      |    |     |                 |                 | NT5C3A MRPS18C                                   |
|                                                   |      |    |     |                 |                 | LCMT1 GBP1                                       |
|                                                   |      |    |     |                 |                 | SAMD9 GBP4                                       |
|                                                   |      |    |     |                 |                 | ATP6V1F TRIM31                                   |
|                                                   |      |    |     |                 |                 | PGP UNC93B1                                      |
|                                                   |      |    |     |                 |                 | RAB32 TYROBP                                     |
|                                                   |      |    |     |                 |                 | SRGN APOL6 EGR2                                  |
|                                                   |      |    |     |                 |                 | CCNE1 PRTN3 IDO1                                 |
|                                                   |      |    |     |                 |                 | TLR3 XAF1 ORAI2                                  |
|                                                   |      |    |     |                 |                 | MELK XCL2 RGS1                                   |
|                                                   |      |    |     |                 |                 | SYNGR2 HELZ2                                     |
|                                                   |      |    |     |                 |                 | CD58 CD83 TREM2                                  |
|                                                   |      |    |     |                 |                 | EIF2AK2 RARRES3                                  |
|                                                   |      |    |     |                 |                 | CCL4 VAMP5 HLA-F                                 |
|                                                   |      |    |     |                 |                 | IL6 LGALS9 HLA-E                                 |
|                                                   |      |    |     |                 |                 | CHRNA3 MX2                                       |
|                                                   |      |    |     |                 |                 | CASP1 PSMG2                                      |
|                                                   |      |    |     |                 |                 | AMBRA1 OR2B6                                     |
|                                                   |      |    |     |                 |                 | UBD CLEC4E                                       |
|                                                   |      |    |     |                 |                 | TNFSF4 HLA-A                                     |
|                                                   |      |    |     |                 |                 | GNA15 JUNB                                       |
|                                                   |      |    |     |                 |                 | SPRR2A CCL20                                     |
|                                                   |      |    |     |                 |                 | CCL3L3 DSN1                                      |
|                                                   |      |    |     |                 |                 | SHISA5 KLRD1                                     |
|                                                   |      |    |     |                 |                 | RGS10 SYT4                                       |
|                                                   |      |    |     |                 |                 | SAMHD1 OR4C45                                    |
|                                                   |      |    |     |                 |                 | ZNF831 ECT2                                      |
|                                                   |      |    |     |                 |                 | OR52E8 RASSF3                                    |
|                                                   |      |    |     |                 |                 | CSH1 GBP2 SVBP                                   |
|                                                   |      |    |     |                 |                 | SOCS1 RSAD2 PML                                  |
|                                                   |      |    |     |                 |                 | GBP1 SRGN CD58                                   |
|                                                   |      |    |     |                 |                 | IL6 LGALS9 HLA-E                                 |
| regulation of peptide secretion                   | GO   | 13 | 471 | 9.1125<br>9E-06 | 0.0006<br>52938 | CASP1 CLEC4E<br>TNFSF4 SYT4                      |
| cellular response to molecule of bacterial origin | GO   | 8  | 163 | 9.2026<br>3E-06 | 0.0006<br>53835 | CMPK2 CXCL10<br>B2M ZFP36 TREM2                  |
| mononuclear cell migration                        | GO   | 5  | 43  | 9.3009<br>5E-06 | 0.0006<br>53835 | IL6 TNFSF4 CCL20<br>XCL2 CCL4 IL6                |
| Type I diabetes mellitus                          | KEGG | 5  | 43  | 9.3009<br>5E-06 | 0.0006<br>53835 | CCL20 CCL3L3<br>HLA-G HLA-C HLA-F<br>HLA-E HLA-A |

|                                     |    |     |       |                 |                 |                                                                                                                                                                                                                                                                                                                                                                                                                                                                                                                                                                                                                                                                                                                                                                                                                                                                      |
|-------------------------------------|----|-----|-------|-----------------|-----------------|----------------------------------------------------------------------------------------------------------------------------------------------------------------------------------------------------------------------------------------------------------------------------------------------------------------------------------------------------------------------------------------------------------------------------------------------------------------------------------------------------------------------------------------------------------------------------------------------------------------------------------------------------------------------------------------------------------------------------------------------------------------------------------------------------------------------------------------------------------------------|
| ER to Golgi<br>transport<br>vesicle | GO | 6   | 77    | 1.0160<br>7E-05 | 0.0007<br>11559 | B2M HLA-G HLA-C<br>HLA-F HLA-E HLA-A<br>ISG15 OASL CMPK2<br>HERC6 MX1 DDX60<br>IFI35 OAS3 SOCS1<br>STAT1 IFI44L RTP4<br>IFI6 PLSCR1 TAP2<br>HERC5 PPA1 MDK<br>OAS2 UBE2L6<br>TRIM69 IFIT3 B2M<br>SLC15A3 RSAD2<br>HLA-G PSMB9 IFI44<br>FCGR1A LAMP3<br>IFI27 IFI30 DDX58<br>OAS1 ISG20 WARS<br>RNF19B IRF9<br>TDRD7 TAP1 NMI<br>IFIT1 TRIM22<br>DYNLT1 IFI16 IFIT2<br>TYMP SP100 PML<br>BCL2A1 TTF2 IFIH1<br>ZFP36 RPL39L<br>MSRA RNF213<br>BIRC3 NFKBIE HLA-<br>C KPNA2 NCAPG<br>SAMD9L UQCRHL<br>NT5C3A MRPS18C<br>LCMT1 GBP1<br>SAMD9 GBP4<br>ATP6V1F TRIM31<br>PGP UNC93B1<br>RAB32 TYROBP<br>SRGN APOL6 EGR2<br>CCNE1 PRTN3 IDO1<br>TLR3 XAF1 MELK<br>RGS1 SYNGR2<br>CD58 EIF2AK2<br>RARRES3 VAMP5<br>HLA-F IL6 LGALS9<br>HLA-E MX2 CASP1<br>PSMG2 AMBRA1<br>UBD HLA-A GNA15<br>SPRR2A DSN1<br>SHISA5 RGS10<br>TESPA1 SYT4<br>BOLA3 ECT2<br>RASSF3 CSH1<br>GBP2 |
| cytoplasm                           | GO | 112 | 11152 | 1.0664<br>2E-05 | 0.0007<br>3563  |                                                                                                                                                                                                                                                                                                                                                                                                                                                                                                                                                                                                                                                                                                                                                                                                                                                                      |

|                                                                   |    |    |      |                 |                 |                                                                                                                                                                                                                                                                                                                                                                                                                                                                                                                                    |
|-------------------------------------------------------------------|----|----|------|-----------------|-----------------|------------------------------------------------------------------------------------------------------------------------------------------------------------------------------------------------------------------------------------------------------------------------------------------------------------------------------------------------------------------------------------------------------------------------------------------------------------------------------------------------------------------------------------|
| regulation of production of molecular mediator of immune response | GO | 7  | 120  | 1.1359<br>E-05  | 0.0007<br>71992 | B2M RSAD2 TLR3<br>IL6 HLA-E TNFSF4<br>HLA-A<br>ISG15 IFITM1<br>CXCL11 DDX60<br>CXCL10 SOCS1<br>STAT1 PLSCR1<br>MDK B2M RSAD2<br>HLA-G PSMB9 IFI27<br>CXCL9 DDX58<br>WARS RNF19B NMI<br>IFIT1 TRIM22 IFI16<br>IFIT2 SP100 PML<br>BCL2A1 ZFP36<br>BIRC3 TRIM31<br>EGR2 CCNE1<br>PRTN3 IDO1 TLR3<br>MELK XCL2 RGS1<br>HELZ2 CD58 CD83<br>TREM2 EIF2AK2<br>PRAMEF1 CCL4 IL6<br>LGALS9 HLA-E<br>CHRNA3 CASP1<br>AMBRA1 UBD<br>CLEC4E TNFSF4<br>HLA-A JUNB CCL20<br>CCL3L3 SHISA5<br>RGS10 HCST<br>TESPA1 SYT4 ECT2<br>IFI27 DDX58 SP100 |
| positive regulation of cellular process                           | GO | 63 | 5503 | 1.1914<br>8E-05 | 0.0008<br>06787 | NFKBIE TLR3 IL6<br>LGALS9 MX2 ECT2                                                                                                                                                                                                                                                                                                                                                                                                                                                                                                 |
| regulation of nucleocytoplasmic transport                         | GO | 9  | 224  | 1.2229<br>1E-05 | 0.0008<br>25039 | RSAD2 PML GBP1<br>SRGN IL6 TNFSF4<br>SYT4                                                                                                                                                                                                                                                                                                                                                                                                                                                                                          |
| negative regulation of peptide secretion                          | GO | 7  | 122  | 1.2574<br>2E-05 | 0.0008<br>42152 | SOCS1 HLA-G CD83                                                                                                                                                                                                                                                                                                                                                                                                                                                                                                                   |
| regulation of T cell differentiation                              | GO | 7  | 122  | 1.2574<br>2E-05 | 0.0008<br>42152 | IL6 LGALS9 TNFSF4<br>TESPA1                                                                                                                                                                                                                                                                                                                                                                                                                                                                                                        |
| negative regulation of establishment of protein localization      | GO | 9  | 225  | 1.2650<br>1E-05 | 0.0008<br>44163 | RSAD2 SP100 PML<br>NFKBIE GBP1<br>SRGN IL6 TNFSF4<br>SYT4                                                                                                                                                                                                                                                                                                                                                                                                                                                                          |
| cytoplasmic vesicle membrane                                      | GO | 16 | 719  | 1.3158<br>7E-05 | 0.0008<br>71788 | TAP2 B2M HLA-G<br>FCGR1A LAMP3<br>TAP1 HLA-C RAB32<br>TYROBP SYNGR2                                                                                                                                                                                                                                                                                                                                                                                                                                                                |

|                                                                            |          |    |      |                 |                 |                                                                                                                                                 |
|----------------------------------------------------------------------------|----------|----|------|-----------------|-----------------|-------------------------------------------------------------------------------------------------------------------------------------------------|
| regulation of cytoplasmic transport                                        | GO       | 13 | 493  | 1.4456<br>9E-05 | 0.0009<br>50955 | CD58 VAMP5 HLA-F<br>HLA-E HLA-A SYT4<br>CXCL11 CXCL10<br>IFI27 CXCL9 DDX58<br>SP100 PML NFKBIE<br>TLR3 IL6 LGALS9<br>MX2 ECT2<br>CXCL11 CXCL10  |
| cell chemotaxis                                                            | GO       | 8  | 174  | 1.4442<br>5E-05 | 0.0009<br>50955 | CXCL9 XCL2 CCL4<br>IL6 CCL20 CCL3L3<br>CXCL11 CXCL10                                                                                            |
| regulation of leukocyte migration                                          | GO       | 8  | 175  | 1.5023<br>1E-05 | 0.0009<br>84678 | CXCL9 XCL2 CCL4<br>IL6 LGALS9 CCL20                                                                                                             |
| positive regulation of production of molecular mediator of immune response | GO       | 6  | 83   | 1.5174<br>E-05  | 0.0009<br>86324 | B2M RSAD2 IL6<br>HLA-E TNFSF4 HLA-A                                                                                                             |
| Chemokine receptors bind chemokines                                        | REACTOME | 5  | 48   | 1.5208<br>8E-05 | 0.0009<br>86324 | CXCL11 CXCL10<br>CXCL9 XCL2 CCL20                                                                                                               |
| Interleukin-10 signaling                                                   | REACTOME | 5  | 48   | 1.5208<br>8E-05 | 0.0009<br>86324 | CXCL10 CCL4 IL6<br>CCL20 CCL3L3<br>PSMB9 XCL2 CCL4                                                                                              |
| response to interleukin-1                                                  | GO       | 7  | 126  | 1.5328<br>2E-05 | 0.0009<br>90575 | IL6 LGALS9 CCL20<br>CCL3L3<br>SOCS1 HLA-G CD83<br>IL6 LGALS9 HLA-E                                                                              |
| positive regulation of leukocyte cell-cell adhesion                        | GO       | 9  | 231  | 1.5444<br>E-05  | 0.0009<br>94572 | TNFSF4 HLA-A<br>TESPA1<br>B2M HLA-G HLA-C                                                                                                       |
| transport vesicle membrane                                                 | GO       | 8  | 176  | 1.5623<br>E-05  | 0.0010<br>02597 | SYNGR2 HLA-F<br>HLA-E HLA-A SYT4<br>MX1 STAT1 IFI6<br>PLSCR1 TRIM69<br>IFI27 IFI16 IFIT2<br>PML BCL2A1 BIRC3<br>SRGN TLR3 XAF1                  |
| apoptotic process                                                          | GO       | 18 | 902  | 1.6865<br>4E-05 | 0.0010<br>71129 | MELK IL6 CASP1<br>SHISA5<br>OAS3 IFI6 PLSCR1<br>PSMB9 LAMP3 IFI27<br>OAS1 IFIT1 DYNLT1<br>IFI16 PML BIRC3<br>TLR3 XCL2 RGS1<br>EIF2AK2 CCL4 IL6 |
| regulation of hydrolase activity                                           | GO       | 25 | 1543 | 1.7289<br>1E-05 | 0.0010<br>94266 | LGALS9 CASP1<br>GNA15 CCL20                                                                                                                     |

|                                                                                                      |    |    |      |                 |                 |                                                                                                                                                                                                             |
|------------------------------------------------------------------------------------------------------|----|----|------|-----------------|-----------------|-------------------------------------------------------------------------------------------------------------------------------------------------------------------------------------------------------------|
|                                                                                                      |    |    |      |                 |                 | CCL3L3 RGS10<br>ECT2<br>TAP2 B2M HLA-G<br>FCGR1A LAMP3<br>TAP1 HLA-C RAB32<br>TYROBP SYNGR2                                                                                                                 |
| vesicle<br>membrane                                                                                  | GO | 16 | 738  | 1.7827<br>3E-05 | 0.0011<br>21153 | CD58 VAMP5 HLA-F<br>HLA-E HLA-A SYT4<br>HERC6 B2M RSAD2<br>PSMB9 IFI16 PML<br>PRTN3 MELK                                                                                                                    |
| hematopoietic<br>or lymphoid<br>organ<br>development                                                 | GO | 14 | 579  | 1.7835<br>7E-05 | 0.0011<br>21153 | TREM2 IL6 LGALS9<br>UBD CLEC4E JUNB                                                                                                                                                                         |
| negative<br>regulation of<br>cytokine<br>secretion                                                   | GO | 5  | 50   | 1.8256<br>4E-05 | 0.0011<br>39817 | PML GBP1 SRGN<br>IL6 TNFSF4<br>CMPK2 CXCL11<br>CXCL10 SOCS1<br>STAT1 B2M PSMB9<br>CXCL9 SP100<br>ZFP36 ATP6V1F<br>EGR2 CCNE1 IDO1<br>TREM2 EIF2AK2 IL6<br>LGALS9 CHRNA3<br>CASP1 TNFSF4<br>GNA15 JUNB CCL20 |
| response to<br>oxygen-<br>containing<br>compound<br>regulation of<br>alpha-beta T<br>cell activation | GO | 28 | 1810 | 1.9567<br>9E-05 | 0.0012<br>13473 | RGS10 ECT2 CSH1<br>GBP2<br>CD83 IL6 LGALS9<br>HLA-E TNFSF4 HLA-<br>A                                                                                                                                        |
| positive<br>regulation of I-<br>kappaB<br>kinase/NF-<br>kappaB<br>signaling                          | GO | 8  | 182  | 1.9661<br>4E-05 | 0.0012<br>15182 | TRIM22 BIRC3 TLR3<br>LGALS9 CASP1<br>UBD SHISA5 ECT2                                                                                                                                                        |
| regulation of I-<br>kappaB<br>kinase/NF-<br>kappaB<br>signaling                                      | GO | 9  | 239  | 1.9971<br>8E-05 | 0.0012<br>30237 | STAT1 TRIM22<br>BIRC3 TLR3<br>LGALS9 CASP1<br>UBD SHISA5 ECT2<br>CMPK2 CXCL10                                                                                                                               |
| cellular<br>response to<br>biotic stimulus                                                           | GO | 8  | 184  | 2.1188<br>E-05  | 0.0012<br>96478 | B2M ZFP36 TREM2<br>IL6 TNFSF4 CCL20<br>CXCL11 DDX60<br>CXCL10 RSAD2<br>PSMB9 CXCL9                                                                                                                          |
| positive<br>regulation of<br>signal<br>transduction                                                  | GO | 24 | 1469 | 2.1570<br>9E-05 | 0.0013<br>13945 | TRIM22 PML BIRC3<br>TLR3 XCL2 TREM2                                                                                                                                                                         |

|                                               |      |     |       |                 |                 |                                                                                                                                                                                                                                                                                                                                                                                                                                                                                                                                                                                                                                                                |
|-----------------------------------------------|------|-----|-------|-----------------|-----------------|----------------------------------------------------------------------------------------------------------------------------------------------------------------------------------------------------------------------------------------------------------------------------------------------------------------------------------------------------------------------------------------------------------------------------------------------------------------------------------------------------------------------------------------------------------------------------------------------------------------------------------------------------------------|
|                                               |      |     |       |                 |                 | EIF2AK2 CCL4 IL6<br>LGALS9 CASP1<br>UBD CCL20 CCL3L3<br>SHISA5 HCST<br>TESPA1 ECT2                                                                                                                                                                                                                                                                                                                                                                                                                                                                                                                                                                             |
| regulation of<br>interleukin-12<br>production | GO   | 5   | 52    | 2.1758<br>8E-05 | 0.0013<br>13945 | HLA-G IDO1 TLR3<br>LGALS9 TNFSF4                                                                                                                                                                                                                                                                                                                                                                                                                                                                                                                                                                                                                               |
| Autoimmune<br>thyroid disease<br>positive     | KEGG | 5   | 52    | 2.1758<br>8E-05 | 0.0013<br>13945 | HLA-G HLA-C HLA-F<br>HLA-E HLA-A                                                                                                                                                                                                                                                                                                                                                                                                                                                                                                                                                                                                                               |
| regulation of<br>leukocyte<br>chemotaxis      | GO   | 6   | 89    | 2.2014<br>2E-05 | 0.0013<br>25028 | CXCL11 CXCL10<br>CXCL9 CCL4 IL6<br>LGALS9<br>ISG15 IFITM1 OASL<br>CMPK2 CXCL11<br>MX1 DDX60 IFI35<br>CXCL10 OAS3<br>SOCS1 STAT1<br>IFI44L RTP4 IFI6<br>PLSCR1 TAP2<br>HERC5 PPA1 MDK<br>OAS2 UBE2L6<br>TRIM69 IFIT3 B2M<br>RSAD2 HLA-G<br>PSMB9 FCGR1A<br>IFI27 IFI30 CXCL9<br>SP110 DDX58<br>PARP12 OAS1<br>ISG20 WARS<br>RNF19B IRF9<br>TDRD7 TAP1<br>CENPW NMI IFIT1<br>TRIM22 DYNLT1<br>KIR2DL3 IFI16 IFIT2<br>TYMP ETV7 SP100<br>PML BCL2A1 LILRA2<br>TTF2 IFIH1 ZFP36<br>RPL39L RNF213<br>BIRC3 NFKBIE HLA-<br>C KPNA2 NCAPG<br>SAMD9L NT5C3A<br>LCMT1 GBP1<br>SAMD9 GBP4<br>ZC2HC1B ATP6V1F<br>TRIM31 PGP<br>UNC93B1 RAB32<br>TYROBP SRGN<br>APOL6 EGR2 |
| binding                                       | GO   | 135 | 14140 | 2.2877<br>4E-05 | 0.0013<br>50497 | CCNE1 LAIR2<br>PRTN3 IDO1 TLR3                                                                                                                                                                                                                                                                                                                                                                                                                                                                                                                                                                                                                                 |

|                                                        |    |    |      |                 |                 |                                                                                                                                                                                                                                                                                                                                                                                                     |
|--------------------------------------------------------|----|----|------|-----------------|-----------------|-----------------------------------------------------------------------------------------------------------------------------------------------------------------------------------------------------------------------------------------------------------------------------------------------------------------------------------------------------------------------------------------------------|
|                                                        |    |    |      |                 |                 | TRANK1 XAF1<br>ORAI2 MELK XCL2<br>RGS1 SYNGR2<br>HELZ2 CD58<br>TRIM48 TREM2<br>EIF2AK2 RARRES3<br>PRAMEF1 CCL4<br>VAMP5 HLA-F<br>ZNFX1 IL6 LGALS9<br>HLA-E CHRNA3 MX2<br>CASP1 PSMG2<br>AMBRA1 UBD<br>CLEC4E TNFSF4<br>HLA-A GNA15 JUNB<br>SPRR2A CCL20<br>CCL3L3 DSN1<br>SHISA5 KLRD1<br>RGS10 HCST<br>TESPA1 SYT4<br>SAMHD1 ZNF831<br>ECT2 RASSF3 CSH1<br>GBP2<br>TAP2 LAMP3 TAP1<br>IFIT1 DYNLT1 |
| interaction with<br>host                               | GO | 8  | 186  | 2.2812<br>5E-05 | 0.0013<br>50497 | KPNA2 TLR3<br>EIF2AK2                                                                                                                                                                                                                                                                                                                                                                               |
| positive<br>regulation of<br>hemopoiesis               | GO | 8  | 186  | 2.2812<br>5E-05 | 0.0013<br>50497 | ISG15 STAT1 HLA-G<br>CD83 IL6 LGALS9<br>TNFSF4 TESPA1                                                                                                                                                                                                                                                                                                                                               |
| negative<br>regulation of<br>secretion by<br>cell      | GO | 8  | 187  | 2.3663<br>1E-05 | 0.0013<br>89841 | RSAD2 PML GBP1<br>SRGN IL6 LGALS9<br>TNFSF4 SYT4                                                                                                                                                                                                                                                                                                                                                    |
| regulation of<br>leukocyte<br>mediated<br>cytotoxicity | GO | 5  | 53   | 2.3694<br>8E-05 | 0.0013<br>89841 | B2M TAP1 LGALS9<br>HLA-E HLA-A<br>TAP2 B2M HLA-G<br>FCGR1A LAMP3<br>TAP1 DYNLT1 PML<br>HLA-C RAB32<br>TYROBP SRGN<br>PRTN3 TLR3<br>SYNGR2 CD58<br>VAMP5 HLA-F HLA-<br>E HLA-A DSN1 SYT4<br>CSH1                                                                                                                                                                                                     |
| cytoplasmic<br>vesicle part                            | GO | 23 | 1393 | 2.6363<br>6E-05 | 0.0015<br>33997 | B2M RSAD2 IFI16<br>PRTN3 TREM2 IL6                                                                                                                                                                                                                                                                                                                                                                  |
| leukocyte<br>differentiation                           | GO | 10 | 311  | 2.6402<br>3E-05 | 0.0015<br>33997 | LGALS9 UBD<br>CLEC4E JUNB                                                                                                                                                                                                                                                                                                                                                                           |



|                                                                  |      |    |      |                 |                 |                                                                                                                                                                                                                                                                                                                                            |
|------------------------------------------------------------------|------|----|------|-----------------|-----------------|--------------------------------------------------------------------------------------------------------------------------------------------------------------------------------------------------------------------------------------------------------------------------------------------------------------------------------------------|
| programmed cell death                                            | GO   | 19 | 1025 | 2.6923<br>E-05  | 0.0015<br>59335 | MX1 STAT1 IFI6<br>PLSCR1 TRIM69<br>IFI27 IFI16 IFIT2<br>PML BCL2A1 BIRC3<br>SRGN TLR3 XAF1<br>MELK IL6 CASP1<br>SPRR2A SHISA5<br>HERC6 B2M RSAD2<br>IFI16 PML PRTN3<br>MELK TREM2 IL6                                                                                                                                                      |
| hemopoiesis                                                      | GO   | 13 | 525  | 2.7069<br>9E-05 | 0.0015<br>62925 | LGALS9 UBD<br>CLEC4E JUNB<br>SOCS1 HLA-G IDO1<br>CD83 IL6 LGALS9                                                                                                                                                                                                                                                                           |
| regulation of T cell activation                                  | GO   | 10 | 315  | 2.9292<br>3E-05 | 0.0016<br>75483 | HLA-E TNFSF4 HLA-A<br>TESPA1<br>STAT1 DDX58 IFIH1                                                                                                                                                                                                                                                                                          |
| Hepatitis B integral component of endoplasmic reticulum membrane | KEGG | 7  | 142  | 3.1796<br>7E-05 | 0.0018<br>07504 | EGR2 CCNE1 TLR3<br>IL6                                                                                                                                                                                                                                                                                                                     |
| regulation of response to biotic stimulus                        | GO   | 9  | 256  | 3.3427<br>4E-05 | 0.0018<br>88547 | TAP2 HLA-G TAP1<br>HLA-C HLA-F HLA-E<br>HLA-A<br>DDX60 HERC5 B2M<br>DDX58 IFIT1 PML<br>BIRC3 EIF2AK2<br>HLA-A<br>CXCL10 OAS3<br>SOCS1 IFI6 PLSCR1<br>HERC5 PSMB9<br>LAMP3 IFI27 OAS1<br>WARS IFIT1<br>DYNLT1 IFI16 PML<br>ZFP36 BIRC3<br>LCMT1 CCNE1 TLR3<br>XCL2 RGS1<br>EIF2AK2 CCL4 IL6<br>LGALS9 CHRNA3<br>CASP1 PSMG2<br>AMBRA1 GNA15 |
| regulation of catalytic activity                                 | GO   | 35 | 2628 | 3.4381<br>6E-05 | 0.0019<br>35709 | CCL20 CCL3L3<br>RGS10 ECT2<br>IFI6 PSMB9 LAMP3<br>IFI27 IFI16 PML                                                                                                                                                                                                                                                                          |
| regulation of endopeptidase activity                             | GO   | 11 | 390  | 3.4472<br>4E-05 | 0.0019<br>35709 | BIRC3 TLR3 IL6<br>LGALS9 CASP1<br>MX1 STAT1 IFIT3<br>B2M HLA-G DDX58                                                                                                                                                                                                                                                                       |
| identical protein binding                                        | GO   | 23 | 1426 | 3.6993<br>4E-05 | 0.0020<br>70955 | WARS TAP1 NMI<br>DYNLT1 IFI16 TYMP                                                                                                                                                                                                                                                                                                         |

|                                                                                                |      |    |      |                 |                 |                                                                                                                                                                                                                                                |
|------------------------------------------------------------------------------------------------|------|----|------|-----------------|-----------------|------------------------------------------------------------------------------------------------------------------------------------------------------------------------------------------------------------------------------------------------|
| Viral myocarditis positive regulation of cell-cell adhesion cellular response to interleukin-1 | KEGG | 5  | 59   | 3.8282<br>6E-05 | 0.0021<br>36631 | SP100 PML BCL2A1<br>IFIH1 GBP1<br>TYROBP TLR3 CCL4<br>SYT4 ECT2 RASSF3<br>HLA-G HLA-C HLA-F<br>HLA-E HLA-A<br>SOCS1 HLA-G CD83<br>IL6 LGALS9 HLA-E                                                                                             |
|                                                                                                | GO   | 9  | 261  | 3.8605<br>3E-05 | 0.0021<br>48133 | TNFSF4 HLA-A<br>TESPA1                                                                                                                                                                                                                         |
|                                                                                                | GO   | 6  | 99   | 3.8751<br>1E-05 | 0.0021<br>4975  | PSMB9 XCL2 CCL4<br>IL6 CCL20 CCL3L3<br>TAP2 B2M SLC15A3<br>RSAD2 HLA-G<br>FCGR1A LAMP3<br>IFI27 TAP1 PML<br>BCL2A1 HLA-C<br>GBP1 GBP4<br>ATP6V1F UNC93B1<br>RAB32 TYROBP<br>SRGN TLR3<br>SYNGR2 CD58 HLA-<br>F HLA-E AMBRA1<br>HLA-A SYT4 GBP2 |
| bounding membrane of organelle intrinsic component of endoplasmic reticulum membrane           | GO   | 28 | 1926 | 4.1001<br>3E-05 | 0.0022<br>4377  | TAP2 HLA-G TAP1<br>HLA-C HLA-F HLA-E<br>HLA-A<br>TAP2 TAP1 SAMD9L<br>SAMD9 VAMP5<br>SYT4<br>CXCL11 CXCL10<br>RTP4 CXCL9 XCL2                                                                                                                   |
| vesicle fusion G-protein coupled receptor binding                                              | GO   | 6  | 100  | 4.0863<br>9E-05 | 0.0022<br>4377  | CCL4 GNA15 CCL20<br>CCL3L3<br>TAP2 TAP1 BCL2A1<br>SAMD9L SAMD9<br>VAMP5 SYT4<br>CXCL11 CXCL10<br>CXCL9 XCL2 CCL4                                                                                                                               |
| organelle fusion Cytokine-cytokine receptor interaction                                        | GO   | 7  | 149  | 4.2562<br>7E-05 | 0.0023<br>12446 | IL6 TNFSF4 CCL20<br>CCL3L3<br>MX1 STAT1 IFI6<br>PLSCR1 TRIM69<br>IFI27 IFI16 IFIT2<br>PML BCL2A1 BIRC3<br>SRGN TLR3 XAF1                                                                                                                       |
|                                                                                                | KEGG | 9  | 265  | 4.3220<br>4E-05 | 0.0023<br>34408 | MELK IL6 CASP1<br>SPRR2A SHISA5                                                                                                                                                                                                                |
| cell death                                                                                     | GO   | 19 | 1066 | 4.4391<br>1E-05 | 0.0023<br>58454 |                                                                                                                                                                                                                                                |

|                                                   |           |    |      |                 |                 |                                                                                                                                                                                                                                                                          |
|---------------------------------------------------|-----------|----|------|-----------------|-----------------|--------------------------------------------------------------------------------------------------------------------------------------------------------------------------------------------------------------------------------------------------------------------------|
| regulation of lymphocyte differentiation          | GO        | 7  | 150  | 4.4318<br>9E-05 | 0.0023<br>58454 | SOCS1 HLA-G CD83<br>IL6 LGALS9 TNFSF4<br>TESPA1                                                                                                                                                                                                                          |
| regulation of interleukin-1 production            | GO        | 5  | 61   | 4.4433<br>9E-05 | 0.0023<br>58454 | IFI16 PML LGALS9<br>CASP1 CCL20                                                                                                                                                                                                                                          |
| Cytosolic DNA-sensing pathway                     | KEGG      | 5  | 61   | 4.4433<br>9E-05 | 0.0023<br>58454 | CXCL10 DDX58<br>CCL4 IL6 CASP1                                                                                                                                                                                                                                           |
| IL12-mediated signaling events                    | Pathway I | 5  | 61   | 4.4433<br>9E-05 | 0.0023<br>58454 | SOCS1 STAT1 B2M<br>CCL4 HLA-A<br>HERC6 SOCS1<br>HERC5 UBE2L6<br>TRIM69 PSMB9<br>RNF19B TRIM22<br>SP100 PML IFIH1<br>RNF213 BIRC3<br>TRIM31 EGR2 UBD<br>SOCS1 STAT1<br>PSMB9 DDX58 IFIT1<br>ATP6V1F EGR2<br>CCNE1 TLR3<br>TREM2 EIF2AK2 IL6<br>CHRNA3 CASP1<br>UBD TNFSF4 |
| protein modification by small protein conjugation | GO        | 16 | 803  | 4.6765<br>6E-05 | 0.0024<br>60938 | GNA15 JUNB<br>RGS10 CSH1                                                                                                                                                                                                                                                 |
| response to nitrogen compound                     | GO        | 20 | 1165 | 4.7809<br>8E-05 | 0.0025<br>08723 | TAP2 TAP1 IFIT1<br>DYNLT1 KPNA2<br>SOCS1 HLA-G IDO1<br>CD83 IL6 LGALS9                                                                                                                                                                                                   |
| intracellular transport of virus                  | GO        | 5  | 63   | 5.1322<br>2E-05 | 0.0026<br>85373 | HLA-E TNFSF4 HLA-A<br>TESPA1                                                                                                                                                                                                                                             |
| regulation of leukocyte cell-cell adhesion        | GO        | 10 | 338  | 5.1710<br>2E-05 | 0.0026<br>90391 | TAP2 TAP1 IFIT1<br>DYNLT1 KPNA2                                                                                                                                                                                                                                          |
| multi-organism cellular localization              | GO        | 5  | 64   | 5.5061<br>E-05  | 0.0028<br>40653 | TAP2 TAP1 IFIT1<br>DYNLT1 KPNA2                                                                                                                                                                                                                                          |
| multi-organism intracellular transport            | GO        | 5  | 64   | 5.5061<br>E-05  | 0.0028<br>40653 | RSAD2 PML GBP1<br>SRGN IL6 LGALS9<br>TNFSF4 SYT4                                                                                                                                                                                                                         |
| negative regulation of secretion                  | GO        | 8  | 212  | 5.5354<br>E-05  | 0.0028<br>47792 | TAP2 TAP1 BCL2A1<br>SAMD9L SAMD9<br>VAMP5 SYT4<br>SOCS1 HLA-G CD83<br>IL6 LGALS9 TNFSF4<br>TESPA1                                                                                                                                                                        |
| single-organism membrane fusion                   | GO        | 7  | 156  | 5.6145<br>7E-05 | 0.0028<br>72479 |                                                                                                                                                                                                                                                                          |
| positive regulation of                            | GO        | 7  | 156  | 5.6145<br>7E-05 | 0.0028<br>72479 |                                                                                                                                                                                                                                                                          |

|                                                                   |    |    |      |                 |                 |                                                                                                                                                                                                                                                                     |
|-------------------------------------------------------------------|----|----|------|-----------------|-----------------|---------------------------------------------------------------------------------------------------------------------------------------------------------------------------------------------------------------------------------------------------------------------|
| leukocyte differentiation cellular response to lipopolysaccharide | GO | 7  | 157  | 5.8346<br>5E-05 | 0.0029<br>68577 | CMPK2 CXCL10<br>B2M ZFP36 IL6<br>TNFSF4 CCL20<br>SOCS1 HLA-G                                                                                                                                                                                                        |
| regulation of leukocyte differentiation                           | GO | 9  | 277  | 5.9949<br>6E-05 | 0.0030<br>41741 | TYROBP TLR3 CD83<br>IL6 LGALS9 TNFSF4<br>TESPA1                                                                                                                                                                                                                     |
| regulation of T cell proliferation                                | GO | 7  | 158  | 6.0617<br>1E-05 | 0.0030<br>67158 | HLA-G IDO1 IL6<br>LGALS9 HLA-E<br>TNFSF4 HLA-A<br>IFI6 PSMB9 LAMP3                                                                                                                                                                                                  |
| regulation of peptidase activity                                  | GO | 11 | 417  | 6.1420<br>5E-05 | 0.0030<br>99294 | IFI27 IFI16 PML<br>BIRC3 TLR3 IL6<br>LGALS9 CASP1<br>IFITM1 CXCL11<br>CXCL10 SOCS1<br>B2M RSAD2 IFI27<br>CXCL9 DDX58<br>TRIM22 SP100 PML<br>ZFP36 NFKBIE<br>GBP1 SRGN CCNE1<br>PRTN3 TLR3 XCL2<br>CD58 TREM2 CCL4<br>IL6 LGALS9 HLA-E<br>CHRNA3 MX2<br>CASP1 CLEC4E |
| regulation of localization                                        | GO | 35 | 2681 | 6.1679<br>3E-05 | 0.0031<br>03851 | TNFSF4 CCL20<br>SYT4 ECT2 SVBP                                                                                                                                                                                                                                      |
| transport of virus                                                | GO | 5  | 66   | 6.3166<br>1E-05 | 0.0031<br>70011 | TAP2 TAP1 IFIT1<br>DYNLT1 KPNA2<br>B2M SLC15A3 HLA-G<br>FCGR1A LAMP3<br>IFI30 PML HLA-C<br>ATP6V1F RAB32                                                                                                                                                            |
| vacuolar part                                                     | GO | 16 | 828  | 6.5903<br>6E-05 | 0.0032<br>98403 | PRTN3 TLR3 HLA-F<br>HLA-E HLA-A DSN1<br>ISG15 IFITM1<br>CXCL10 STAT1 B2M<br>HLA-G CXCL9<br>DYNLT1 PML ZFP36<br>GBP1 TYROBP<br>CCNE1 TLR3 CD83<br>EIF2AK2 PRAMEF1<br>IL6 LGALS9<br>CHRNA3 TNFSF4                                                                     |
| regulation of cell differentiation                                | GO | 25 | 1645 | 6.6535<br>8E-05 | 0.0033<br>2102  | JUNB TESPA1 SYT4<br>ECT2                                                                                                                                                                                                                                            |

|                               |    |     |       |                 |                 |                                                                                                                                                                                                                                                                                                                                                                                                                                                                                                                                                                                                                                                                                                                                                         |
|-------------------------------|----|-----|-------|-----------------|-----------------|---------------------------------------------------------------------------------------------------------------------------------------------------------------------------------------------------------------------------------------------------------------------------------------------------------------------------------------------------------------------------------------------------------------------------------------------------------------------------------------------------------------------------------------------------------------------------------------------------------------------------------------------------------------------------------------------------------------------------------------------------------|
|                               |    |     |       |                 |                 | IFITM1 STAT1 HLA-G FCGR1A SP110 KIR2DL3 OR4C15 LILRA2 HLA-C TYROBP LAIR2 TLR3 RGS1 TREM2 CCL4 HLA-F LGALS9 HLA-E CHRNA3 OR2B6 KIR2DL2 CLEC4E HLA-A GNA15 SHISA5 KLRD1 RGS10 OR4C45 ECT2 OR52E8 ISG15 IFITM1 OASL CMPK2 HERC6 CXCL11 MX1 DDX60 IFI35 CXCL10 OAS3 SOCS1 STAT1 IFI44L RTP4 IFI6 PLSCR1 TAP2 HERC5 PPA1 MDK OAS2 UBE2L6 TRIM69 IFIT3 B2M SLC15A3 RSAD2 HLA-G PSMB9 IFI44 FCGR1A LAMP3 IFI27 IFI30 CXCL9 SP110 DDX58 OAS1 ISG20 WARS RNF19B IRF9 TDRD7 TAP1 CENPW NMI IFIT1 TRIM22 DYNLT1 OR4C15 IFI16 IFIT2 TYMP ETV7 SP100 PML BCL2A1 LILRA2 TTF2 IFIH1 ZFP36 RPL39L MSRA RNF213 BIRC3 NFKBIE HLA-C KPNA2 NCAPG SAMD9L UQCRHL NT5C3A MRPS18C LCMT1 GBP1 SAMD9 GBP4 ATP6V1F TRIM31 PGP UNC93B1 RAB32 TYROBP SRGN EGR2 CCNE1 PRTN3 IDO1 TLR3 |
| molecular transducer activity | GO | 30  | 2192  | 6.8292<br>9E-05 | 0.0033<br>90349 |                                                                                                                                                                                                                                                                                                                                                                                                                                                                                                                                                                                                                                                                                                                                                         |
| cellular process              | GO | 139 | 15083 | 6.9269<br>2E-05 | 0.0034<br>29572 |                                                                                                                                                                                                                                                                                                                                                                                                                                                                                                                                                                                                                                                                                                                                                         |

|                                                    |    |    |      |                 |                 |                                                                                                                                                                                                                                                                                                                                                                                                                                                                   |
|----------------------------------------------------|----|----|------|-----------------|-----------------|-------------------------------------------------------------------------------------------------------------------------------------------------------------------------------------------------------------------------------------------------------------------------------------------------------------------------------------------------------------------------------------------------------------------------------------------------------------------|
|                                                    |    |    |      |                 |                 | XAF1 ORAI2 MELK<br>XCL2 RGS1<br>SYNGR2 HELZ2<br>CD58 CD83 TREM2<br>EIF2AK2 RARRES3<br>CCL4 VAMP5 HLA-F<br>IL6 LGALS9 HLA-E<br>CHRNA3 MX2<br>CASP1 PSMG2<br>AMBRA1 OR2B6<br>UBD CLEC4E<br>TNFSF4 HLA-A<br>GNA15 JUNB<br>SPRR2A CCL20<br>CCL3L3 DSN1<br>SHISA5 KLRD1<br>RGS10 HCST<br>TESPA1 SYT4<br>SAMHD1 OR4C45<br>ZNF831 ECT2<br>OR52E8 RASSF3<br>CSH1 GBP2 SVBP                                                                                                |
| regulation of<br>cell killing                      | GO | 5  | 68   | 7.2160<br>4E-05 | 0.0035<br>44132 | B2M TAP1 LGALS9<br>HLA-E HLA-A<br>CMPK2 MX1 TAP2<br>OAS2 OAS1 TAP1<br>TYMP TTF2 RNF213<br>UQCRHL NT5C3A<br>GBP1 GBP4<br>ATP6V1F RAB32<br>MX2 GNA15<br>SAMHD1 GBP2<br>PSMB9 DDX58 IFI16<br>IFIH1 BIRC3<br>UNC93B1 TLR3<br>LGALS9 CLEC4E<br>B2M HLA-G<br>FCGR1A LAMP3<br>PML HLA-C SAMD9L<br>SAMD9 UNC93B1<br>RAB32 TLR3 VAMP5<br>HLA-F HLA-E HLA-A<br>CSH1<br>IFITM1 STAT1 IFIT3<br>HLA-G IFI30 WARS<br>PML IDO1 EIF2AK2<br>RARRES3 IL6<br>LGALS9 AMBRA1<br>CCL3L3 |
| nucleotide<br>metabolic<br>process                 | GO | 19 | 1110 | 7.3675<br>7E-05 | 0.0036<br>08934 | TAP2 TAP1<br>TYMP TTF2 RNF213<br>UQCRHL NT5C3A<br>GBP1 GBP4<br>ATP6V1F RAB32<br>MX2 GNA15<br>SAMHD1 GBP2<br>PSMB9 DDX58 IFI16<br>IFIH1 BIRC3<br>UNC93B1 TLR3<br>LGALS9 CLEC4E<br>B2M HLA-G<br>FCGR1A LAMP3<br>PML HLA-C SAMD9L<br>SAMD9 UNC93B1<br>RAB32 TLR3 VAMP5<br>HLA-F HLA-E HLA-A<br>CSH1<br>IFITM1 STAT1 IFIT3<br>HLA-G IFI30 WARS<br>PML IDO1 EIF2AK2<br>RARRES3 IL6<br>LGALS9 AMBRA1<br>CCL3L3                                                          |
| activation of<br>innate immune<br>response         | GO | 9  | 285  | 7.3886<br>3E-05 | 0.0036<br>09652 | TAP2 TAP1<br>TYMP TTF2 RNF213<br>UQCRHL NT5C3A<br>GBP1 GBP4<br>ATP6V1F RAB32<br>MX2 GNA15<br>SAMHD1 GBP2<br>PSMB9 DDX58 IFI16<br>IFIH1 BIRC3<br>UNC93B1 TLR3<br>LGALS9 CLEC4E<br>B2M HLA-G<br>FCGR1A LAMP3<br>PML HLA-C SAMD9L<br>SAMD9 UNC93B1<br>RAB32 TLR3 VAMP5<br>HLA-F HLA-E HLA-A<br>CSH1<br>IFITM1 STAT1 IFIT3<br>HLA-G IFI30 WARS<br>PML IDO1 EIF2AK2<br>RARRES3 IL6<br>LGALS9 AMBRA1<br>CCL3L3                                                          |
| endosome                                           | GO | 16 | 837  | 7.4306<br>8E-05 | 0.0036<br>20588 | TAP2 TAP1<br>TYMP TTF2 RNF213<br>UQCRHL NT5C3A<br>GBP1 GBP4<br>ATP6V1F RAB32<br>MX2 GNA15<br>SAMHD1 GBP2<br>PSMB9 DDX58 IFI16<br>IFIH1 BIRC3<br>UNC93B1 TLR3<br>LGALS9 CLEC4E<br>B2M HLA-G<br>FCGR1A LAMP3<br>PML HLA-C SAMD9L<br>SAMD9 UNC93B1<br>RAB32 TLR3 VAMP5<br>HLA-F HLA-E HLA-A<br>CSH1<br>IFITM1 STAT1 IFIT3<br>HLA-G IFI30 WARS<br>PML IDO1 EIF2AK2<br>RARRES3 IL6<br>LGALS9 AMBRA1<br>CCL3L3                                                          |
| negative<br>regulation of<br>cell<br>proliferation | GO | 14 | 670  | 8.0500<br>5E-05 | 0.0039<br>12027 | TAP2 TAP1<br>TYMP TTF2 RNF213<br>UQCRHL NT5C3A<br>GBP1 GBP4<br>ATP6V1F RAB32<br>MX2 GNA15<br>SAMHD1 GBP2<br>PSMB9 DDX58 IFI16<br>IFIH1 BIRC3<br>UNC93B1 TLR3<br>LGALS9 CLEC4E<br>B2M HLA-G<br>FCGR1A LAMP3<br>PML HLA-C SAMD9L<br>SAMD9 UNC93B1<br>RAB32 TLR3 VAMP5<br>HLA-F HLA-E HLA-A<br>CSH1<br>IFITM1 STAT1 IFIT3<br>HLA-G IFI30 WARS<br>PML IDO1 EIF2AK2<br>RARRES3 IL6<br>LGALS9 AMBRA1<br>CCL3L3                                                          |
| multi-organism<br>transport                        | GO | 5  | 70   | 8.2108<br>7E-05 | 0.0039<br>69232 | TAP2 TAP1 IFIT1<br>DYNLT1 KPNA2                                                                                                                                                                                                                                                                                                                                                                                                                                   |

|                                                                                   |          |    |      |                 |                 |                                                                                                                                                                                                                                                                                                                 |
|-----------------------------------------------------------------------------------|----------|----|------|-----------------|-----------------|-----------------------------------------------------------------------------------------------------------------------------------------------------------------------------------------------------------------------------------------------------------------------------------------------------------------|
| multi-organism localization                                                       | GO       | 5  | 70   | 8.2108<br>7E-05 | 0.0039<br>69232 | TAP2 TAP1 IFIT1<br>DYNLT1 KPNA2<br>MX1 TAP2 TAP1<br>TYMP TTF2 RNF213<br>NT5C3A GBP1<br>GBP4 ATP6V1F                                                                                                                                                                                                             |
| nucleoside catabolic process                                                      | GO       | 14 | 672  | 8.2956<br>E-05  | 0.0039<br>99694 | RAB32 MX2 GNA15<br>GBP2<br>B2M HLA-G                                                                                                                                                                                                                                                                            |
| coated vesicle membrane defense response to bacterium apoptotic signaling pathway | GO       | 7  | 167  | 8.4485<br>6E-05 | 0.0040<br>41705 | FCGR1A HLA-C<br>HLA-F HLA-E HLA-A<br>ISG15 B2M TLR3 IL6                                                                                                                                                                                                                                                         |
|                                                                                   | GO       | 8  | 226  | 8.4891<br>6E-05 | 0.0040<br>50606 | HLA-E CLEC4E HLA-A<br>CCL20<br>IFI6 IFI27 IFI16 PML                                                                                                                                                                                                                                                             |
|                                                                                   | GO       | 9  | 292  | 8.8218<br>6E-05 | 0.0041<br>98477 | BCL2A1 SRGN TLR3<br>MELK SHISA5<br>CXCL11 DDX60<br>CXCL10 SOCS1<br>STAT1 IFI6 PLSCR1<br>RSAD2 PSMB9<br>CXCL9 TRIM22<br>DYNLT1 TYMP<br>SP100 PML BCL2A1<br>RNF213 BIRC3<br>GBP1 EGR2 TLR3<br>XCL2 RGS1 TREM2<br>EIF2AK2 PRAMEF1<br>CCL4 IL6 LGALS9<br>CHRNA3 CASP1<br>AMBRA1 UBD<br>CCL20 CCL3L3<br>SHISA5 RGS10 |
| regulation of cell communication positive regulation of interleukin-6 production  | GO       | 41 | 3393 | 8.9346<br>5E-05 | 0.0042<br>41196 | HCST TESPA1 SYT4<br>ECT2                                                                                                                                                                                                                                                                                        |
|                                                                                   | GO       | 5  | 72   | 9.3078<br>3E-05 | 0.0044<br>06981 | DDX58 TLR3 IL6<br>LGALS9 TNFSF4<br>CXCL10 SOCS1<br>STAT1 PSMB9<br>PRTN3 CCL4 IL6<br>LGALS9 CASP1                                                                                                                                                                                                                |
| Signaling by Interleukins                                                         | REACTOME | 12 | 516  | 9.4024<br>1E-05 | 0.0044<br>40347 | JUNB CCL20<br>CCL3L3<br>MX1 TAP2 OAS2<br>ISG20 TAP1 TYMP<br>TTF2 ZFP36 RNF213<br>NT5C3A GBP1                                                                                                                                                                                                                    |
| cellular nitrogen compound catabolic process                                      | GO       | 19 | 1134 | 9.5946<br>E-05  | 0.0045<br>19525 | GBP4 ATP6V1F<br>RAB32 IDO1 MX2                                                                                                                                                                                                                                                                                  |

|                                                       |    |    |      |                 |                 |                                                                                                                                                                                                                                                               |
|-------------------------------------------------------|----|----|------|-----------------|-----------------|---------------------------------------------------------------------------------------------------------------------------------------------------------------------------------------------------------------------------------------------------------------|
| glycosyl<br>compound<br>catabolic<br>process          | GO | 14 | 682  | 9.6232<br>E-05  | 0.0045<br>21431 | GNA15 SAMHD1<br>GBP2<br>MX1 TAP2 TAP1<br>TYMP TTF2 RNF213<br>NT5C3A GBP1<br>GBP4 ATP6V1F<br>RAB32 MX2 GNA15<br>GBP2<br>OASL DDX60 OAS3<br>HERC5 OAS2 IFIT3<br>DDX58 PARP12<br>OAS1 ISG20 TDRD7<br>IFIT1 IFI16 IFIT2<br>IFIH1 ZFP36 RPL39L<br>KPNA2 TLR3 HELZ2 |
| RNA binding<br>organelle<br>membrane<br>fusion        | GO | 24 | 1583 | 9.7279<br>6E-05 | 0.0045<br>47452 | EIF2AK2 ZNFX1<br>HLA-A SAMHD1<br>TAP2 TAP1 SAMD9L                                                                                                                                                                                                             |
|                                                       | GO | 6  | 118  | 9.7679<br>2E-05 | 0.0045<br>5457  | SAMD9 VAMP5<br>SYT4<br>IFITM1 CXCL11<br>CXCL10 STAT1<br>IFIT3 HLA-G IFI30<br>CXCL9 WARS PML<br>ZFP36 PRTN3 IDO1<br>EIF2AK2 RARRES3<br>PRAMEF1 IL6<br>LGALS9 HLA-E<br>AMBRA1 TNFSF4                                                                            |
| regulation of<br>cell<br>proliferation                | GO | 24 | 1588 | 9.9312<br>5E-05 | 0.0046<br>07399 | HLA-A JUNB<br>CCL3L3<br>MX1 TAP2 OAS2<br>ISG20 TAP1 TYMP<br>TTF2 ZFP36 RNF213<br>NT5C3A GBP1<br>GBP4 ATP6V1F<br>RAB32 IDO1 MX2                                                                                                                                |
| heterocycle<br>catabolic<br>process                   | GO | 19 | 1137 | 9.9108<br>9E-05 | 0.0046<br>07399 | GNA15 SAMHD1<br>GBP2<br>MX1 TAP2 OAS2<br>ISG20 TAP1 TYMP<br>TTF2 ZFP36 RNF213<br>NT5C3A GBP1<br>GBP4 ATP6V1F<br>RAB32 IDO1 MX2                                                                                                                                |
| aromatic<br>compound<br>catabolic<br>process          | GO | 19 | 1140 | 0.0001<br>02363 | 0.0047<br>16269 | GNA15 SAMHD1<br>GBP2<br>SOCS1 HLA-G CD83<br>IL6 LGALS9 HLA-E                                                                                                                                                                                                  |
| positive<br>regulation of<br>lymphocyte<br>activation | GO | 9  | 298  | 0.0001<br>0229  | 0.0047<br>16269 | TNFSF4 HLA-A<br>TESPA1                                                                                                                                                                                                                                        |



|                                                                                    |    |    |      |                 |                 |                                                                                                                                                                                                                                                           |
|------------------------------------------------------------------------------------|----|----|------|-----------------|-----------------|-----------------------------------------------------------------------------------------------------------------------------------------------------------------------------------------------------------------------------------------------------------|
| positive regulation of apoptotic process                                           | GO | 13 | 604  | 0.0001<br>05395 | 0.0048<br>28749 | IFI27 IFIT2 PML<br>BCL2A1 IDO1 TLR3<br>MELK EIF2AK2 IL6<br>LGALS9 CASP1<br>UBD ECT2<br>SOCS1 RSAD2 PML<br>GBP1 SRGN CD58<br>IL6 LGALS9 HLA-E<br>CHRNA3 CASP1                                                                                              |
| regulation of secretion by cell                                                    | GO | 14 | 693  | 0.0001<br>12923 | 0.0051<br>22706 | CLEC4E TNFSF4<br>SYT4<br>IFI27 IFIT2 PML<br>BCL2A1 IDO1 TLR3<br>MELK EIF2AK2 IL6<br>LGALS9 CASP1<br>UBD ECT2                                                                                                                                              |
| positive regulation of programmed cell death                                       | GO | 13 | 610  | 0.0001<br>15745 | 0.0052<br>37828 | UBD ECT2                                                                                                                                                                                                                                                  |
| positive regulation of sequence-specific DNA binding transcription factor activity | GO | 8  | 237  | 0.0001<br>16341 | 0.0052<br>51899 | DDX58 TRIM22<br>SP100 TRIM31 TLR3<br>EIF2AK2 IL6<br>LGALS9                                                                                                                                                                                                |
| pattern recognition receptor signaling pathway                                     | GO | 6  | 123  | 0.0001<br>21326 | 0.0054<br>36937 | DDX58 IFIH1 BIRC3<br>UNC93B1 TLR3<br>LGALS9<br>CMPK2 MX1 TAP2<br>OAS2 OAS1 TAP1<br>TYMP TTF2 RNF213<br>UQCRHL NT5C3A<br>GBP1 GBP4<br>ATP6V1F RAB32                                                                                                        |
| nucleoside phosphate metabolic process                                             | GO | 19 | 1157 | 0.0001<br>22637 | 0.0054<br>8235  | MX2 GNA15<br>SAMHD1 GBP2<br>B2M HLA-G<br>FCGR1A PML HLA-C<br>RAB32 TLR3 HLA-F<br>HLA-E HLA-A CSH1<br>OASL CMPK2<br>CXCL11 MX1 DDX60<br>CXCL10 OAS3<br>IFI44L TAP2 MDK<br>OAS2 B2M DDX58<br>OAS1 WARS TAP1<br>TTF2 IFIH1 GBP1<br>GBP4 RAB32<br>TRANK1 MELK |
| endosomal part                                                                     | GO | 11 | 454  | 0.0001<br>26209 | 0.0056<br>14777 | HELZ2 TREM2<br>EIF2AK2 MX2                                                                                                                                                                                                                                |
| carbohydrate derivative binding                                                    | GO | 30 | 2239 | 0.0001<br>32094 | 0.0058<br>20351 |                                                                                                                                                                                                                                                           |

|                                                                                 |      |    |      |                 |                 |                                                                                                                                                                                                                                                                            |
|---------------------------------------------------------------------------------|------|----|------|-----------------|-----------------|----------------------------------------------------------------------------------------------------------------------------------------------------------------------------------------------------------------------------------------------------------------------------|
| Chemokine signaling pathway                                                     | KEGG | 7  | 180  | 0.0001<br>31954 | 0.0058<br>20351 | GNA15 SAMHD1<br>GBP2<br>CXCL11 CXCL10<br>STAT1 CXCL9 CCL4<br>CCL20 CCL3L3<br>CMPK2 CXCL10<br>SOCS1 STAT1 B2M<br>PSMB9 ZFP36<br>ATP6V1F EGR2<br>TREM2 IL6 CHRNA3<br>TNFSF4 GNA15<br>CCL20 RGS10 ECT2<br>CSH1 GBP2<br>CXCL11 CXCL10<br>IFI27 CXCL9 DDX58<br>SP100 PML NFKBIE |
| cellular response to oxygen-containing compound                                 | GO   | 19 | 1169 | 0.0001<br>38991 | 0.0060<br>99507 | TLR3 IL6 LGALS9<br>MX2 ECT2<br>TAP2 HLA-G TAP1<br>HLA-C VAMP5 HLA-F<br>HLA-E HLA-A<br>SYT4<br>CXCL11 CXCL10<br>CXCL9 XCL2 CD58                                                                                                                                             |
| regulation of intracellular transport intrinsic component of organelle membrane | GO   | 13 | 622  | 0.0001<br>39092 | 0.0060<br>99507 | CCL4 IL6 CCL20<br>CCL3L3<br>MX1 TAP2 OAS2<br>ISG20 TAP1 TYMP<br>TTF2 ZFP36 RNF213<br>NT5C3A GBP1<br>GBP4 ATP6V1F                                                                                                                                                           |
| leukocyte migration                                                             | GO   | 9  | 312  | 0.0001<br>42553 | 0.0062<br>21659 | RAB32 MX2 GNA15<br>SAMHD1 GBP2<br>CXCL11 DDX60<br>CXCL10 SOCS1<br>STAT1 IFI6 PLSCR1<br>RSAD2 PSMB9<br>CXCL9 TRIM22<br>DYNLT1 SP100 PML<br>RNF213 BIRC3<br>GBP1 TLR3 XCL2<br>RGS1 TREM2<br>EIF2AK2 PRAMEF1<br>CCL4 IL6 LGALS9<br>CASP1 UBD CCL20<br>CCL3L3 SHISA5           |
| nucleobase-containing compound catabolic process                                | GO   | 18 | 1083 | 0.0001<br>54852 | 0.0067<br>26559 | RGS10 HCST<br>TESPA1 ECT2<br>MX1 TAP2 OAS2<br>ISG20 TAP1 TYMP<br>TTF2 ZFP36 RNF213                                                                                                                                                                                         |
| regulation of signal transduction                                               | GO   | 35 | 2825 | 0.0001<br>55601 | 0.0067<br>28573 |                                                                                                                                                                                                                                                                            |
| organic cyclic compound                                                         | GO   | 19 | 1180 | 0.0001<br>55629 | 0.0067<br>28573 |                                                                                                                                                                                                                                                                            |

|                                                              |          |    |      |                 |                 |                                                                                                                                                                                                                                                                                            |
|--------------------------------------------------------------|----------|----|------|-----------------|-----------------|--------------------------------------------------------------------------------------------------------------------------------------------------------------------------------------------------------------------------------------------------------------------------------------------|
| catabolic process                                            |          |    |      |                 |                 | NT5C3A GBP1<br>GBP4 ATP6V1F<br>RAB32 IDO1 MX2<br>GNA15 SAMHD1<br>GBP2                                                                                                                                                                                                                      |
| RIG-I/MDA5 mediated induction of IFN-alpha/beta pathways     | REACTOME | 5  | 81   | 0.0001<br>56998 | 0.0067<br>71854 | ISG15 HERC5<br>UBE2L6 DDX58<br>IFIH1<br>CXCL11 DDX60<br>CXCL10 SOCS1<br>STAT1 IFI6 PLSCR1<br>RSAD2 PSMB9<br>CXCL9 TRIM22<br>DYNLT1 TYMP<br>SP100 PML RNF213<br>BIRC3 GBP1 EGR2<br>TLR3 XCL2 RGS1<br>TREM2 EIF2AK2<br>PRAMEF1 CCL4 IL6<br>LGALS9 CHRNA3<br>CASP1 UBD CCL20<br>CCL3L3 SHISA5 |
| regulation of signaling                                      | GO       | 39 | 3254 | 0.0001<br>64512 | 0.0070<br>79382 | RGS10 HCST<br>TESPA1 SYT4 ECT2<br>HERC6 SOCS1<br>HERC5 UBE2L6<br>TRIM69 PSMB9<br>DDX58 RNF19B<br>TRIM22 SP100 PML                                                                                                                                                                          |
| protein modification by small protein conjugation or removal | GO       | 17 | 996  | 0.0001<br>6916  | 0.0072<br>62465 | IFIH1 RNF213 BIRC3<br>TRIM31 EGR2 UBD<br>CXCL11 CXCL10<br>SOCS1 B2M RSAD2<br>IFI27 CXCL9 DDX58<br>SP100 PML NFKBIE<br>GBP1 SRGN PRTN3<br>TLR3 CD58 CCL4<br>IL6 LGALS9 HLA-E<br>CHRNA3 MX2                                                                                                  |
| regulation of transport                                      | GO       | 27 | 1984 | 0.0001<br>69951 | 0.0072<br>79427 | CASP1 CLEC4E<br>TNFSF4 SYT4 ECT2<br>SOCS1 STAT1 IFI6<br>HLA-G PSMB9 TAP1<br>NMI IFIT1 IFI16<br>BCL2A1 ZFP36<br>RNF213 GBP1 TLR3<br>RGS1 EIF2AK2                                                                                                                                            |
| negative regulation of response to stimulus                  | GO       | 23 | 1561 | 0.0001<br>71054 | 0.0073<br>09664 | PRAMEF1 IL6<br>LGALS9 HLA-E                                                                                                                                                                                                                                                                |

|                                                  |      |    |      |                 |                 |                                                                                                                   |
|--------------------------------------------------|------|----|------|-----------------|-----------------|-------------------------------------------------------------------------------------------------------------------|
|                                                  |      |    |      |                 |                 | TNFSF4 HLA-A<br>RGS10                                                                                             |
| positive regulation of ERK1 and ERK2 cascade     | GO   | 7  | 189  | 0.0001<br>75982 | 0.0074<br>68307 | XCL2 TREM2 CCL4<br>IL6 LGALS9 CCL20<br>CCL3L3<br>MX1 TAP2 TAP1<br>TYMP TTF2 RNF213<br>NT5C3A GBP1<br>GBP4 ATP6V1F |
| carbohydrate derivative catabolic process        | GO   | 15 | 815  | 0.0001<br>7768  | 0.0075<br>23019 | RAB32 MX2 GNA15<br>SAMHD1 GBP2<br>MX1 TAP2 TAP1<br>TTF2 RNF213 GBP1<br>GBP4 ATP6V1F                               |
| purine nucleoside triphosphate catabolic process | GO   | 13 | 640  | 0.0001<br>81643 | 0.0076<br>38148 | RAB32 MX2 GNA15<br>SAMHD1 GBP2<br>HLA-G ZFP36 HLA-C                                                               |
| HTLV-I infection                                 | KEGG | 8  | 255  | 0.0001<br>88143 | 0.0078<br>75479 | EGR2 HLA-F IL6<br>HLA-E HLA-A<br>CXCL11 CXCL10                                                                    |
| positive regulation of chemotaxis                | GO   | 6  | 134  | 0.0001<br>89319 | 0.0079<br>06754 | CXCL9 CCL4 IL6<br>LGALS9<br>MX1 TAP2 TAP1<br>TTF2 RNF213 GBP1<br>GBP4 ATP6V1F                                     |
| nucleoside triphosphate catabolic process        | GO   | 13 | 645  | 0.0001<br>95274 | 0.0081<br>18625 | RAB32 MX2 GNA15<br>SAMHD1 GBP2<br>IFI27 IFIT2 PML<br>BCL2A1 IDO1 TLR3<br>MELK EIF2AK2 IL6                         |
| positive regulation of cell death                | GO   | 13 | 649  | 0.0002<br>06798 | 0.0085<br>59128 | LGALS9 CASP1<br>UBD ECT2<br>SOCS1 HLA-G CD83<br>IL6 LGALS9 HLA-E                                                  |
| positive regulation of leukocyte activation      | GO   | 9  | 329  | 0.0002<br>08387 | 0.0085<br>86306 | TNFSF4 HLA-A<br>TESPA1<br>GBP1 XCL2 TREM2                                                                         |
| positive regulation of ERK1 and ERK2 cascade     | GO   | 8  | 259  | 0.0002<br>08224 | 0.0085<br>86306 | CCL4 IL6 LGALS9<br>CCL20 CCL3L3<br>HERC6 HERC5<br>TRIM69 WARS<br>RNF19B TRIM22                                    |
| ligase activity                                  | GO   | 10 | 406  | 0.0002<br>18038 | 0.0089<br>43909 | RNF213 BIRC3<br>TRIM31 EGR2<br>CXCL11 DDX60<br>CXCL10 RSAD2<br>PSMB9 CXCL9<br>TRIM22 PML BIRC3                    |
| positive regulation of signaling                 | GO   | 24 | 1725 | 0.0002<br>31133 | 0.0094<br>39051 | TLR3 XCL2 TREM2<br>EIF2AK2 CCL4 IL6                                                                               |

|                                                    |    |    |       |                 |                 |                               |
|----------------------------------------------------|----|----|-------|-----------------|-----------------|-------------------------------|
|                                                    |    |    |       |                 |                 | LGALS9 CASP1                  |
|                                                    |    |    |       |                 |                 | UBD CCL20 CCL3L3              |
|                                                    |    |    |       |                 |                 | SHISA5 HCST                   |
|                                                    |    |    |       |                 |                 | TESPA1 ECT2                   |
|                                                    |    |    |       |                 |                 | ISG15 OASL CMPK2              |
|                                                    |    |    |       |                 |                 | HERC6 MX1 IFI35               |
|                                                    |    |    |       |                 |                 | OAS3 SOCS1                    |
|                                                    |    |    |       |                 |                 | STAT1 IFI44L IFI6             |
|                                                    |    |    |       |                 |                 | PLSCR1 TAP2                   |
|                                                    |    |    |       |                 |                 | HERC5 OAS2                    |
|                                                    |    |    |       |                 |                 | UBE2L6 TRIM69                 |
|                                                    |    |    |       |                 |                 | IFIT3 B2M SLC15A3             |
|                                                    |    |    |       |                 |                 | RSAD2 HLA-G                   |
|                                                    |    |    |       |                 |                 | PSMB9 FCGR1A                  |
|                                                    |    |    |       |                 |                 | LAMP3 IFI27 IFI30             |
|                                                    |    |    |       |                 |                 | SP110 PARP12                  |
|                                                    |    |    |       |                 |                 | OAS1 ISG20 WARS               |
|                                                    |    |    |       |                 |                 | RNF19B IRF9                   |
|                                                    |    |    |       |                 |                 | TDRD7 TAP1                    |
|                                                    |    |    |       |                 |                 | CENPW NMI TRIM22              |
|                                                    |    |    |       |                 |                 | DYNLT1 IFI16 IFIT2            |
|                                                    |    |    |       |                 |                 | ETV7 SP100 PML                |
|                                                    |    |    |       |                 |                 | BCL2A1 TTF2 IFIH1             |
|                                                    |    |    |       |                 |                 | ZFP36 MSRA                    |
|                                                    |    |    |       |                 |                 | RNF213 BIRC3                  |
|                                                    |    |    |       |                 |                 | NFKBIE HLA-C                  |
|                                                    |    |    |       |                 |                 | KPNA2 NCAPG                   |
|                                                    |    |    |       |                 |                 | UQCRHL NT5C3A                 |
|                                                    |    |    |       |                 |                 | MRPS18C GBP1                  |
|                                                    |    |    |       |                 |                 | SAMD9 GBP4                    |
|                                                    |    |    |       |                 |                 | ATP6V1F TRIM31                |
|                                                    |    |    |       |                 |                 | UNC93B1 RAB32                 |
|                                                    |    |    |       |                 |                 | SRGN EGR2 CCNE1               |
|                                                    |    |    |       |                 |                 | PRTN3 TLR3 XAF1               |
|                                                    |    |    |       |                 |                 | MELK HELZ2                    |
|                                                    |    |    |       |                 |                 | TREM2 EIF2AK2                 |
|                                                    |    |    |       |                 |                 | VAMP5 HLA-F                   |
|                                                    |    |    |       |                 |                 | ZNFX1 LGALS9                  |
|                                                    |    |    |       |                 |                 | HLA-E MX2 CASP1               |
|                                                    |    |    |       |                 |                 | PSMG2 AMBRA1                  |
|                                                    |    |    |       |                 |                 | UBD HLA-A JUNB                |
|                                                    |    |    |       |                 |                 | DSN1 SHISA5                   |
|                                                    |    |    |       |                 |                 | RGS10 TESPA1                  |
|                                                    |    |    |       |                 |                 | SYT4 SAMHD1                   |
| intracellular<br>membrane-<br>bounded<br>organelle | GO | 99 | 10581 | 0.0002<br>58371 | 0.0104<br>12853 | BOLA3 ZNF831                  |
|                                                    |    |    |       |                 |                 | ECT2 CSH1 GBP2                |
|                                                    |    |    |       |                 |                 | SOCS1 HLA-G IDO1              |
| regulation of<br>cell-cell<br>adhesion             | GO | 10 | 415   | 0.0002<br>57906 | 0.0104<br>12853 | CD83 IL6 LGALS9               |
|                                                    |    |    |       |                 |                 | HLA-E TNFSF4 HLA-<br>A TESPA1 |

|                                                                     |      |     |       |        |        |                                                                                                                                                                                                                                                                                                                                                                                                                                                                                                                                                                                                                                                                                                             |
|---------------------------------------------------------------------|------|-----|-------|--------|--------|-------------------------------------------------------------------------------------------------------------------------------------------------------------------------------------------------------------------------------------------------------------------------------------------------------------------------------------------------------------------------------------------------------------------------------------------------------------------------------------------------------------------------------------------------------------------------------------------------------------------------------------------------------------------------------------------------------------|
| nucleobase-<br>containing<br>small molecule<br>metabolic<br>process | GO   | 19  | 1232  | 0.0002 | 0.0104 | CMPK2 MX1 TAP2<br>OAS2 OAS1 TAP1<br>TYMP TTF2 RNF213<br>UQCRHL NT5C3A<br>GBP1 GBP4<br>ATP6V1F RAB32<br>MX2 GNA15<br>SAMHD1 GBP2                                                                                                                                                                                                                                                                                                                                                                                                                                                                                                                                                                             |
|                                                                     | KEGG | 6   | 143   | 0.0002 | 0.0105 | HLA-G HLA-C CD58<br>HLA-F HLA-E HLA-A<br>ISG15 IFITM1 OASL<br>CMPK2 HERC6<br>CXCL11 MX1 DDX60<br>IFI35 CXCL10 OAS3<br>SOCS1 STAT1<br>IFI44L RTP4 IFI6<br>PLSCR1 TAP2<br>HERC5 PPA1 MDK<br>OAS2 UBE2L6<br>TRIM69 IFIT3 B2M<br>SLC15A3 RSAD2<br>HLA-G PSMB9<br>FCGR1A IFI27 IFI30<br>CXCL9 SP110<br>DDX58 PARP12<br>OAS1 ISG20 WARS<br>RNF19B IRF9<br>TDRD7 TAP1<br>CENPW NMI IFIT1<br>TRIM22 DYNLT1<br>KIR2DL3 OR4C15<br>IFI16 IFIT2 TYMP<br>ETV7 SP100 PML<br>BCL2A1 LILRA2<br>TTF2 IFIH1 ZFP36<br>RPL39L MSRA<br>RNF213 BIRC3<br>NFKBIE HLA-C<br>KPNA2 NCAPG<br>SAMD9L UQCRHL<br>NT5C3A MRPS18C<br>LCMT1 GBP1<br>SAMD9 GBP4<br>ZC2HC1B ATP6V1F<br>TRIM31 PGP<br>UNC93B1 RAB32<br>TYROBP SRGN<br>APOL6 EGR2 |
| Cell adhesion<br>molecules<br>(CAMs)                                | GO   | 19  | 1232  | 0.0002 | 0.0104 |                                                                                                                                                                                                                                                                                                                                                                                                                                                                                                                                                                                                                                                                                                             |
| molecular_<br>function                                              | GO   | 146 | 16545 | 0.0002 | 0.0106 | CCNE1 LAIR2<br>PRTN3 IDO1 TLR3                                                                                                                                                                                                                                                                                                                                                                                                                                                                                                                                                                                                                                                                              |

|                 |    |    |      |        |        |                  |
|-----------------|----|----|------|--------|--------|------------------|
|                 |    |    |      |        |        | TRANK1 XAF1      |
|                 |    |    |      |        |        | ORAI2 MELK XCL2  |
|                 |    |    |      |        |        | RGS1 SYNGR2      |
|                 |    |    |      |        |        | HELZ2 CD58       |
|                 |    |    |      |        |        | TRIM48 TREM2     |
|                 |    |    |      |        |        | EIF2AK2 RARRES3  |
|                 |    |    |      |        |        | PRAMEF1 CCL4     |
|                 |    |    |      |        |        | VAMP5 HLA-F      |
|                 |    |    |      |        |        | ZNFX1 IL6 LGALS9 |
|                 |    |    |      |        |        | HLA-E CHRNA3 MX2 |
|                 |    |    |      |        |        | CASP1 PSMG2      |
|                 |    |    |      |        |        | AMBRA1 OR2B6     |
|                 |    |    |      |        |        | KIR2DL2 UBD      |
|                 |    |    |      |        |        | CLEC4E TNFSF4    |
|                 |    |    |      |        |        | HLA-A GNA15 JUNB |
|                 |    |    |      |        |        | SPRR2A CCL20     |
|                 |    |    |      |        |        | CCL3L3 DSN1      |
|                 |    |    |      |        |        | SHISA5 KLRD1     |
|                 |    |    |      |        |        | RGS10 HCST       |
|                 |    |    |      |        |        | TESPA1 SYT4      |
|                 |    |    |      |        |        | SAMHD1 OR4C45    |
|                 |    |    |      |        |        | BOLA3 ZNF831     |
|                 |    |    |      |        |        | ECT2 OR52E8      |
|                 |    |    |      |        |        | RASSF3 CSH1      |
|                 |    |    |      |        |        | GBP2             |
|                 |    |    |      |        |        | CMPK2 MX1 TAP2   |
|                 |    |    |      |        |        | TAP1 TTF2 RNF213 |
|                 |    |    |      |        |        | UQCRHL GBP1      |
| nucleoside      |    |    |      |        |        | GBP4 ATP6V1F     |
| triphosphate    |    |    |      |        |        | RAB32 MX2 GNA15  |
| metabolic       |    |    |      | 0.0002 | 0.0109 | SAMHD1 GBP2      |
| process         | GO | 15 | 851  | 75852  | 73293  | MX1 TAP2 OAS2    |
|                 |    |    |      |        |        | OAS1 TAP1 TTF2   |
|                 |    |    |      |        |        | RNF213 UQCRHL    |
|                 |    |    |      |        |        | NT5C3A GBP1      |
| purine-         |    |    |      |        |        | GBP4 ATP6V1F     |
| containing      |    |    |      |        |        | RAB32 MX2 GNA15  |
| compound        |    |    |      | 0.0002 | 0.0111 | SAMHD1 GBP2      |
| metabolic       |    |    |      | 81597  | 77682  | SOCS1 HLA-G CD83 |
| process         | GO | 17 | 1043 |        |        | IL6 LGALS9 HLA-E |
|                 |    |    |      |        |        | TNFSF4 HLA-A     |
|                 |    |    |      |        |        | TESPA1           |
| positive        |    |    |      |        |        | CXCL11 CXCL10    |
| regulation of   |    |    |      | 0.0002 | 0.0112 | CXCL9 XCL2 CCL4  |
| cell activation | GO | 9  | 344  | 8574   | 93486  | IL6 LGALS9       |
|                 |    |    |      |        |        |                  |
| regulation of   |    |    |      |        |        |                  |
| chemotaxis      |    |    |      | 0.0002 | 0.0114 |                  |
| negative        |    |    |      | 91167  | 66224  |                  |
| regulation of   |    |    |      |        |        |                  |
| cysteine-type   |    |    |      |        |        |                  |
| endopeptidase   |    |    |      |        |        |                  |
| activity        | GO | 5  | 94   | 0.0003 | 0.0118 | IFI6 LAMP3 IFI16 |
|                 |    |    |      | 02598  | 83247  | BIRC3 IL6        |

|                                        |    |    |      |                 |                 |                                                                                                                                                                                               |
|----------------------------------------|----|----|------|-----------------|-----------------|-----------------------------------------------------------------------------------------------------------------------------------------------------------------------------------------------|
| regulation of homeostatic process      | GO | 11 | 505  | 0.0003<br>03951 | 0.0119<br>10989 | ISG15 CXCL11<br>CXCL10 STAT1 IFI6<br>B2M CXCL9 PML<br>ZFP36 IL6 LGALS9<br>HLA-G IDO1 IL6                                                                                                      |
| regulation of lymphocyte proliferation | GO | 7  | 208  | 0.0003<br>07962 | 0.0119<br>91621 | LGALS9 HLA-E<br>TNFSF4 HLA-A<br>RSAD2 SP100 PML<br>NFKBIE GBP1<br>SRGN PRTN3 IL6                                                                                                              |
| negative regulation of transport       | GO | 11 | 507  | 0.0003<br>13868 | 0.0121<br>95815 | LGALS9 TNFSF4<br>SYT4<br>B2M PRTN3 CD83                                                                                                                                                       |
| humoral immune response                | GO | 7  | 209  | 0.0003<br>16645 | 0.0122<br>77831 | TREM2 IL6 HLA-E<br>HLA-A<br>SOCS1 TAP2 B2M<br>HLA-G FCGR1A<br>LAMP3 TAP1<br>DYNLT1 PML HLA-C<br>SAMD9L SAMD9<br>UNC93B1 RAB32<br>TYROBP SRGN<br>PRTN3 TLR3<br>SYNGR2 CD58<br>VAMP5 HLA-F HLA- |
| cytoplasmic vesicle                    | GO | 28 | 2170 | 0.0003<br>21716 | 0.0124<br>48263 | E AMBRA1 HLA-A<br>DSN1 SYT4 CSH1<br>SOCS1 RSAD2 PML<br>GBP1 SRGN CD58<br>IL6 LGALS9 HLA-E<br>CHRNA3 CASP1                                                                                     |
| regulation of secretion                | GO | 14 | 772  | 0.0003<br>2424  | 0.0124<br>93409 | CLEC4E TNFSF4<br>SYT4<br>SOCS1 PLSCR1<br>HLA-G IDO1 CD83<br>IL6 LGALS9 HLA-E                                                                                                                  |
| regulation of leukocyte activation     | GO | 11 | 509  | 0.0003<br>24055 | 0.0124<br>93409 | TNFSF4 HLA-A<br>TESPA1<br>SOCS1 TAP2 B2M<br>HLA-G FCGR1A<br>LAMP3 TAP1<br>DYNLT1 PML HLA-C<br>SAMD9L SAMD9<br>UNC93B1 RAB32<br>TYROBP SRGN<br>PRTN3 TLR3<br>SYNGR2 CD58<br>VAMP5 HLA-F HLA-   |
| intracellular vesicle                  | GO | 28 | 2173 | 0.0003<br>25561 | 0.0125<br>18114 | E AMBRA1 HLA-A<br>DSN1 SYT4 CSH1                                                                                                                                                              |



|                                                       |    |    |      |        |        |                                                                                                                                                                                                                                     |
|-------------------------------------------------------|----|----|------|--------|--------|-------------------------------------------------------------------------------------------------------------------------------------------------------------------------------------------------------------------------------------|
| innate immune response-activating signal transduction | GO | 8  | 279  | 0.0003 | 0.0127 | PSMB9 DDX58 IFIH1<br>BIRC3 UNC93B1<br>TLR3 LGALS9<br>CLEC4E                                                                                                                                                                         |
| recycling endosome                                    | GO | 6  | 150  | 0.0003 | 0.0128 | B2M HLA-G HLA-C<br>HLA-F HLA-E HLA-A<br>ISG15 CXCL10<br>STAT1 B2M HLA-G<br>PSMB9 WARS<br>DYNLT1 TYMP<br>SP100 PML ZFP36<br>TYROBP SRGN<br>IDO1 TLR3 CD83                                                                            |
| regulation of multicellular organismal development    | GO | 25 | 1857 | 0.0003 | 0.0128 | EIF2AK2 IL6<br>LGALS9 CHRNA3<br>TNFSF4 TESPA1<br>SYT4 ECT2<br>ISG15 IFITM1<br>CXCL10 STAT1 B2M<br>HLA-G PSMB9<br>CXCL9 WARS<br>DYNLT1 TYMP<br>SP100 PML ZFP36<br>GBP1 TYROBP<br>SRGN CCNE1 IDO1<br>TLR3 CD83 EIF2AK2<br>PRAMEF1 IL6 |
| regulation of developmental process                   | GO | 31 | 2538 | 0.0003 | 0.0134 | LGALS9 CHRNA3<br>TNFSF4 JUNB<br>TESPA1 SYT4 ECT2<br>MX1 TAP2 TAP1<br>TTF2 RNF213 GBP1<br>GBP4 ATP6V1F                                                                                                                               |
| purine-containing compound catabolic process          | GO | 13 | 690  | 0.0003 | 0.0135 | RAB32 MX2 GNA15<br>SAMHD1 GBP2                                                                                                                                                                                                      |
| positive regulation of T cell proliferation           | GO | 5  | 98   | 0.0003 | 0.0135 | IL6 LGALS9 HLA-E<br>TNFSF4 HLA-A<br>SOCS1 HLA-G IDO1<br>CD83 IL6 LGALS9                                                                                                                                                             |
| regulation of lymphocyte activation                   | GO | 10 | 435  | 0.0003 | 0.0137 | HLA-E TNFSF4 HLA-A<br>TESPA1<br>CXCL11 DDX60<br>CXCL10 RSAD2<br>PSMB9 CXCL9<br>TRIM22 PML BIRC3<br>TLR3 XCL2 TREM2                                                                                                                  |
| positive regulation of cell communication             | GO | 25 | 1876 | 0.0003 | 0.0138 | EIF2AK2 CCL4 IL6<br>LGALS9 CASP1                                                                                                                                                                                                    |

|                                                                   |    |    |      |                 |                 |                                                                                                                                         |
|-------------------------------------------------------------------|----|----|------|-----------------|-----------------|-----------------------------------------------------------------------------------------------------------------------------------------|
|                                                                   |    |    |      |                 |                 | AMBRA1 UBD<br>CCL20 CCL3L3<br>SHISA5 HCST<br>TESPA1 ECT2<br>CXCL11 CXCL10<br>CXCL9 TYMP EGR2<br>XCL2 CCL4 IL6<br>LGALS9 CCL20<br>CCL3L3 |
| chemotaxis<br>regulation of<br>interferon-<br>gamma<br>production | GO | 11 | 518  | 0.0003<br>73395 | 0.0138<br>86097 |                                                                                                                                         |
|                                                                   | GO | 5  | 99   | 0.0003<br>79704 | 0.0140<br>42946 | ISG15 TLR3 LGALS9<br>TNFSF4 HLA-A<br>B2M HLA-G HLA-C<br>GBP1 GBP4<br>UNC93B1 SRGN                                                       |
| Golgi<br>membrane                                                 | GO | 13 | 695  | 0.0003<br>86969 | 0.0142<br>82938 | TLR3 HLA-F HLA-E<br>HLA-A SYT4 GBP2<br>IFI27 DDX58 SP100<br>PML NFKBIE GBP1<br>CCNE1 TLR3                                               |
| regulation of<br>cellular protein<br>localization                 | GO | 12 | 607  | 0.0003<br>91541 | 0.0144<br>22798 | TREM2 IL6 LGALS9<br>ECT2                                                                                                                |
| regulation of<br>cytoplasmic<br>transport                         | GO | 8  | 286  | 0.0003<br>94571 | 0.0145<br>05389 | CXCL11 CXCL10<br>CXCL9 DDX58 TLR3<br>IL6 LGALS9 ECT2                                                                                    |
| myeloid<br>leukocyte<br>differentiation                           | GO | 5  | 100  | 0.0003<br>96752 | 0.0145<br>27576 | IFI16 PRTN3<br>LGALS9 UBD JUNB                                                                                                          |
| regulation of<br>cytokine<br>biosynthetic<br>process              | GO | 5  | 100  | 0.0003<br>96752 | 0.0145<br>27576 | NMI ZFP36 TLR3 IL6<br>CCL20<br>DDX60 DDX58 TTF2                                                                                         |
| helicase<br>activity                                              | GO | 6  | 155  | 0.0003<br>99731 | 0.0145<br>91687 | IFIH1 TRANK1<br>HELZ2<br>CXCL10 SOCS1<br>STAT1 MDK PSMB9<br>DDX58 IFIT1 ZFP36<br>CCNE1 TLR3 CD83<br>EIF2AK2 IL6                         |
| response to<br>organic cyclic<br>compound                         | GO | 16 | 980  | 0.0004<br>02913 | 0.0146<br>65716 | CHRNA3 CASP1<br>JUNB                                                                                                                    |
| regulation of<br>mononuclear<br>cell<br>proliferation             | GO | 7  | 218  | 0.0004<br>03951 | 0.0146<br>74508 | HLA-G IDO1 IL6<br>LGALS9 HLA-E<br>TNFSF4 HLA-A<br>OASL CMPK2 MX1                                                                        |
| purine<br>nucleotide<br>binding                                   | GO | 25 | 1898 | 0.0004<br>17856 | 0.0151<br>15055 | DDX60 OAS3 IFI44L<br>TAP2 OAS2 DDX58                                                                                                    |

|                                                                                                    |    |    |      |                 |                 |                                                                                                                                                                                                                                                                                                                                                                                                                                                                                                                     |
|----------------------------------------------------------------------------------------------------|----|----|------|-----------------|-----------------|---------------------------------------------------------------------------------------------------------------------------------------------------------------------------------------------------------------------------------------------------------------------------------------------------------------------------------------------------------------------------------------------------------------------------------------------------------------------------------------------------------------------|
| regulation of intracellular signal transduction                                                    | GO | 24 | 1756 | 0.0004<br>1854  | 0.0151<br>15055 | OAS1 WARS TAP1<br>TTF2 IFIH1 GBP1<br>GBP4 RAB32<br>TRANK1 MELK<br>HELZ2 EIF2AK2<br>MX2 GNA15<br>SAMHD1 GBP2<br>CXCL11 DDX60<br>CXCL10 SOCS1<br>STAT1 CXCL9<br>TRIM22 PML BIRC3<br>GBP1 TLR3 XCL2<br>TREM2 EIF2AK2<br>CCL4 IL6 LGALS9<br>CASP1 UBD CCL20<br>CCL3L3 SHISA5<br>HCST ECT2<br>CMPK2 MX1<br>PLSCR1 TAP2 PPA1<br>OAS2 PSMB9 OAS1<br>TAP1 TYMP PML<br>TTF2 ZFP36 RNF213<br>UQCRHL NT5C3A<br>GBP1 GBP4<br>ATP6V1F PGP<br>RAB32 CCNE1 TLR3<br>MELK EIF2AK2<br>RARRES3 LGALS9<br>MX2 GNA15 HCST<br>SAMHD1 GBP2 |
| phosphate-containing compound metabolic process positive regulation of protein import into nucleus | GO | 32 | 2657 | 0.0004<br>40475 | 0.0158<br>76056 | DDX58 TLR3 IL6<br>LGALS9 ECT2<br>OASL CMPK2 MX1<br>DDX60 OAS3 IFI44L<br>TAP2 OAS2 DDX58<br>OAS1 WARS TAP1<br>TTF2 IFIH1 GBP1<br>GBP4 RAB32<br>TRANK1 MELK<br>HELZ2 EIF2AK2<br>MX2 GNA15 GBP2<br>MX1 TAP2 B2M<br>SLC15A3 RSAD2<br>HLA-G FCGR1A<br>LAMP3 IFI27 TAP1<br>PML BCL2A1 HLA-C<br>UQCRHL MRPS18C<br>GBP1 GBP4<br>ATP6V1F UNC93B1                                                                                                                                                                             |
| purine ribonucleoside triphosphate binding                                                         | GO | 24 | 1783 | 0.0004<br>61788 | 0.0165<br>47111 |                                                                                                                                                                                                                                                                                                                                                                                                                                                                                                                     |
| organelle membrane                                                                                 | GO | 34 | 2895 | 0.0004<br>72939 | 0.0169<br>13785 |                                                                                                                                                                                                                                                                                                                                                                                                                                                                                                                     |

|                                                  |    |    |      |                 |                 |                                                                                                                                                                                                                                           |
|--------------------------------------------------|----|----|------|-----------------|-----------------|-------------------------------------------------------------------------------------------------------------------------------------------------------------------------------------------------------------------------------------------|
|                                                  |    |    |      |                 |                 | RAB32 TYROBP<br>SRGN TLR3<br>SYNGR2 CD58<br>VAMP5 HLA-F HLA-<br>E MX2 AMBRA1<br>HLA-A SHISA5 SYT4<br>GBP2<br>CMPK2 MX1<br>PLSCR1 TAP2 OAS2<br>OAS1 TAP1 TYMP<br>TTF2 RNF213<br>UQCRHL NT5C3A<br>GBP1 GBP4<br>ATP6V1F PGP<br>RAB32 RARRES3 |
| organophosphate metabolic process                | GO | 22 | 1606 | 0.0004<br>8371  | 0.0172<br>65444 | MX2 GNA15<br>SAMHD1 GBP2<br>ISG15 IFITM1 STAT1<br>HLA-G CXCL9<br>ZFP36 CCNE1 CD83<br>IL6 LGALS9 TNFSF4                                                                                                                                    |
| positive regulation of cell differentiation      | GO | 15 | 902  | 0.0004<br>92392 | 0.0173<br>73333 | JUNB TESPA1 SYT4<br>ECT2<br>HLA-G IDO1 IL6                                                                                                                                                                                                |
| regulation of leukocyte proliferation            | GO | 7  | 227  | 0.0005<br>09457 | 0.0177<br>39808 | LGALS9 HLA-E<br>TNFSF4 HLA-A                                                                                                                                                                                                              |
| myeloid leukocyte migration                      | GO | 5  | 106  | 0.0005<br>11447 | 0.0177<br>39808 | XCL2 CCL4 IL6<br>CCL20 CCL3L3                                                                                                                                                                                                             |
| positive regulation of protein import            | GO | 5  | 106  | 0.0005<br>11447 | 0.0177<br>39808 | DDX58 TLR3 IL6<br>LGALS9 ECT2<br>CXCL11 CXCL10<br>B2M CXCL9 DDX58<br>TLR3 CD58 CCL4<br>IL6 LGALS9 HLA-E                                                                                                                                   |
| positive regulation of transport                 | GO | 16 | 1006 | 0.0005<br>27294 | 0.0182<br>55079 | CASP1 CLEC4E<br>TNFSF4 SYT4 ECT2                                                                                                                                                                                                          |
| positive regulation of protein secretion         | GO | 7  | 229  | 0.0005<br>35632 | 0.0185<br>0895  | CD58 IL6 LGALS9<br>HLA-E CASP1<br>CLEC4E TNFSF4<br>ISG15 CXCL10<br>SOCS1 IFI6 HERC5<br>PSMB9 LAMP3 IFI27<br>WARS RNF19B NMI<br>IFI16 PML ZFP36<br>BIRC3 LCMT1 GBP1<br>CCNE1 TLR3 XCL2                                                     |
| regulation of cellular protein metabolic process | GO | 32 | 2716 | 0.0005<br>41517 | 0.0186<br>77275 | TREM2 EIF2AK2<br>CCL4 IL6 LGALS9                                                                                                                                                                                                          |

|                                                             |          |     |       |                 |                 |                                                                                                                                                                                                               |
|-------------------------------------------------------------|----------|-----|-------|-----------------|-----------------|---------------------------------------------------------------------------------------------------------------------------------------------------------------------------------------------------------------|
| TNF signaling pathway                                       | KEGG     | 5   | 108   | 0.0005<br>54708 | 0.0190<br>25349 | CHRNA3 CASP1<br>PSMG2 CCL20<br>CCL3L3 ECT2 SVBP<br>CXCL10 BIRC3 IL6<br>JUNB CCL20<br>OASL CMPK2 MX1<br>DDX60 OAS3 IFI44L<br>TAP2 OAS2 DDX58<br>OAS1 WARS TAP1<br>TTF2 IFIH1 GBP1<br>GBP4 RAB32<br>TRANK1 MELK |
| purine ribonucleotide binding                               | GO       | 24  | 1827  | 0.0005<br>65389 | 0.0193<br>55653 | HELZ2 EIF2AK2<br>MX2 GNA15 GBP2                                                                                                                                                                               |
| Antigen processing: Ubiquitination & Proteasome degradation | REACTOME | 8   | 303   | 0.0005<br>69113 | 0.0194<br>38979 | HERC6 SOCS1<br>HERC5 UBE2L6<br>TRIM69 PSMB9<br>RNF19B RNF213                                                                                                                                                  |
| regulation of sequence-specific DNA binding                 |          |     |       |                 |                 | DDX58 TRIM22<br>SP100 TRIM31 TLR3                                                                                                                                                                             |
| transcription factor activity                               | GO       | 9   | 380   | 0.0005<br>71274 | 0.0194<br>48651 | EIF2AK2 IL6<br>LGALS9 TNFSF4                                                                                                                                                                                  |
| regulation of interleukin-6 production                      | GO       | 5   | 109   | 0.0005<br>77339 | 0.0196<br>18864 | DDX58 TLR3 IL6<br>LGALS9 TNFSF4<br>OASL CMPK2 MX1<br>DDX60 OAS3 IFI44L<br>TAP2 OAS2 DDX58<br>OAS1 WARS TAP1<br>TTF2 IFIH1 GBP1<br>GBP4 RAB32<br>TRANK1 MELK                                                   |
| purine ribonucleoside binding                               | GO       | 24  | 1833  | 0.0005<br>83003 | 0.0197<br>74865 | HELZ2 EIF2AK2<br>MX2 GNA15 GBP2<br>SOCS1 PLSCR1<br>HLA-G IDO1 CD83<br>IL6 LGALS9 HLA-E                                                                                                                        |
| regulation of cell activation                               | GO       | 11  | 548   | 0.0005<br>85515 | 0.0198<br>23559 | TNFSF4 HLA-A<br>TESPA1<br>ISG15 OASL CMPK2<br>HERC6 MX1 DDX60<br>IFI35 OAS3 SOCS1<br>STAT1 IFI44L RTP4<br>IFI6 PLSCR1 TAP2<br>HERC5 PPA1 MDK<br>OAS2 UBE2L6                                                   |
| intracellular part                                          | GO       | 123 | 13993 | 0.0005<br>90206 | 0.0198<br>29329 | TRIM69 IFIT3 B2M<br>SLC15A3 RSAD2                                                                                                                                                                             |

purine  
nucleoside  
binding

GO

24

1836

0.0005  
92145

0.0198  
29329

HLA-G PSMB9 IFI44  
FCGR1A LAMP3  
IFI27 IFI30 SP110  
DDX58 PARP12  
OAS1 ISG20 WARS  
RNF19B IRF9  
TDRD7 TAP1  
CENPW NMI IFIT1  
TRIM22 DYNLT1  
IFI16 IFIT2 TYMP  
ETV7 SP100 PML  
BCL2A1 TTF2 IFIH1  
ZFP36 RPL39L  
MSRA RNF213  
BIRC3 NFKBIE HLA-  
C KPNA2 NCAPG  
SAMD9L UQCRHL  
NT5C3A MRPS18C  
LCMT1 GBP1  
SAMD9 GBP4  
ATP6V1F TRIM31  
PGP UNC93B1  
RAB32 TYROBP  
SRGN APOL6 EGR2  
CCNE1 PRTN3 IDO1  
TLR3 XAF1 MELK  
RGS1 SYNGR2  
HELZ2 CD58 TREM2  
EIF2AK2 RARRES3  
VAMP5 HLA-F  
ZNFX1 IL6 LGALS9  
HLA-E CHRNA3 MX2  
CASP1 PSMG2  
AMBRA1 UBD HLA-  
A GNA15 JUNB  
SPRR2A DSN1  
SHISA5 RGS10  
TESPA1 SYT4  
SAMHD1 BOLA3  
ZNF831 ECT2  
RASSF3 CSH1  
GBP2  
OASL CMPK2 MX1  
DDX60 OAS3 IFI44L  
TAP2 OAS2 DDX58  
OAS1 WARS TAP1  
TTF2 IFIH1 GBP1  
GBP4 RAB32  
TRANK1 MELK  
HELZ2 EIF2AK2  
MX2 GNA15 GBP2

|                                                                  |    |     |       |                 |                 |                                                                                                                                                            |
|------------------------------------------------------------------|----|-----|-------|-----------------|-----------------|------------------------------------------------------------------------------------------------------------------------------------------------------------|
|                                                                  |    |     |       |                 |                 | OASL CMPK2 MX1<br>DDX60 OAS3 IFI44L<br>TAP2 OAS2 DDX58<br>OAS1 WARS TAP1<br>TTF2 IFIH1 GBP1<br>GBP4 RAB32<br>TRANK1 MELK                                   |
| ribonucleoside<br>binding                                        | GO | 24  | 1836  | 0.0005<br>92145 | 0.0198<br>29329 | HELZ2 EIF2AK2<br>MX2 GNA15 GBP2<br>MX1 TAP2 TAP1<br>TTF2 RNF213 GBP1<br>GBP4 ATP6V1F                                                                       |
| ribonucleoside<br>triphosphate<br>catabolic<br>process           | GO | 12  | 637   | 0.0005<br>89305 | 0.0198<br>29329 | RAB32 MX2 GNA15<br>GBP2                                                                                                                                    |
| purine<br>ribonucleoside<br>triphosphate<br>catabolic<br>process | GO | 12  | 637   | 0.0005<br>89305 | 0.0198<br>29329 | MX1 TAP2 TAP1<br>TTF2 RNF213 GBP1<br>GBP4 ATP6V1F<br>RAB32 MX2 GNA15<br>GBP2                                                                               |
| plasma<br>membrane<br>protein<br>complex                         | GO | 7   | 233   | 0.0005<br>91179 | 0.0198<br>29329 | B2M HLA-G HLA-C<br>HLA-F HLA-E HLA-A<br>GNA15                                                                                                              |
|                                                                  |    |     |       |                 |                 | OASL CMPK2 MX1<br>DDX60 OAS3 IFI44L<br>TAP2 OAS2 DDX58<br>OAS1 WARS TAP1<br>TTF2 IFIH1 GBP1<br>GBP4 RAB32<br>TRANK1 MELK                                   |
| nucleoside<br>binding                                            | GO | 24  | 1843  | 0.0006<br>14364 | 0.0204<br>61774 | HELZ2 EIF2AK2<br>MX2 GNA15 GBP2<br>IFI6 PSMB9 LAMP3<br>IFI27 RNF19B IFI16<br>PML BIRC3 LCMT1                                                               |
| regulation of<br>proteolysis                                     | GO | 14  | 826   | 0.0006<br>13454 | 0.0204<br>61774 | TLR3 IL6 LGALS9<br>CASP1 PSMG2<br>OASL CMPK2 MX1<br>DDX60 OAS3 IFI44L<br>TAP2 OAS2 DDX58<br>OAS1 WARS TAP1<br>TTF2 IFIH1 GBP1<br>GBP4 RAB32<br>TRANK1 MELK |
| ribonucleotide<br>binding                                        | GO | 24  | 1844  | 0.0006<br>17641 | 0.0205<br>33786 | HELZ2 EIF2AK2<br>MX2 GNA15 GBP2<br>ISG15 OASL CMPK2<br>HERC6 MX1 DDX60<br>IFI35 OAS3 SOCS1                                                                 |
| intracellular                                                    | GO | 125 | 14282 | 0.0006<br>42712 | 0.0212<br>90411 | STAT1 IFI44L RTP4<br>IFI6 PLSR1 TAP2                                                                                                                       |

|              |    |    |     |        |        |  |  |
|--------------|----|----|-----|--------|--------|--|--|
| purine       |    |    |     |        |        |  |  |
| nucleoside   |    |    |     | 0.0006 | 0.0212 |  |  |
| triphosphate | GO | 14 | 830 | 41589  | 90411  |  |  |

HERC5 PPA1 MDK  
 OAS2 UBE2L6  
 TRIM69 IFIT3 B2M  
 SLC15A3 RSAD2  
 HLA-G PSMB9 IFI44  
 FCGR1A LAMP3  
 IFI27 IFI30 SP110  
 DDX58 PARP12  
 OAS1 ISG20 WARS  
 RNF19B IRF9  
 TDRD7 TAP1  
 CENPW NMI IFIT1  
 TRIM22 DYNLT1  
 IFI16 IFIT2 TYMP  
 ETV7 SP100 PML  
 BCL2A1 TTF2 IFIH1  
 ZFP36 RPL39L  
 MSRA RNF213  
 BIRC3 NFKBIE HLA-  
 C KPNA2 NCAPG  
 SAMD9L UQCRHL  
 NT5C3A MRPS18C  
 LCMT1 GBP1  
 SAMD9 GBP4  
 ATP6V1F TRIM31  
 PGP UNC93B1  
 RAB32 TYROBP  
 SRGN APOL6 EGR2  
 CCNE1 PRTN3 IDO1  
 TLR3 XAF1 MELK  
 RGS1 SYNGR2  
 HELZ2 CD58  
 TRIM48 TREM2  
 EIF2AK2 RARRES3  
 VAMP5 HLA-F  
 ZNFX1 IL6 LGALS9  
 HLA-E CHRNA3 MX2  
 CASP1 PSMG2  
 AMBRA1 UBD HLA-  
 A GNA15 JUNB  
 SPRR2A CCL20  
 DSN1 SHISA5  
 RGS10 TESPA1  
 SYT4 SAMHD1  
 BOLA3 ZNF831  
 ECT2 RASSF3 CSH1  
 GBP2  
 MX1 TAP2 TAP1  
 TTF2 RNF213  
 UQCRHL GBP1  
 GBP4 ATP6V1F



metabolic  
process

RAB32 MX2 GNA15  
 SAMHD1 GBP2  
 ISG15 OASL CMPK2  
 HERC6 MX1 DDX60  
 IFI35 OAS3 SOCS1  
 STAT1 IFI44L IFI6  
 PLSCR1 TAP2  
 HERC5 OAS2  
 UBE2L6 TRIM69  
 IFIT3 B2M SLC15A3  
 RSAD2 HLA-G  
 PSMB9 FCGR1A  
 LAMP3 IFI27 IFI30  
 SP110 DDX58  
 PARP12 OAS1  
 ISG20 WARS  
 RNF19B IRF9  
 TDRD7 TAP1  
 CENPW NMI TRIM22  
 DYNLT1 IFI16 IFIT2  
 ETV7 SP100 PML  
 BCL2A1 TTF2 IFIH1  
 ZFP36 RPL39L  
 MSRA RNF213  
 BIRC3 NFKBIE HLA-  
 C KPNA2 NCAPG  
 SAMD9L UQCRHL  
 NT5C3A MRPS18C  
 GBP1 SAMD9 GBP4  
 ATP6V1F TRIM31  
 UNC93B1 RAB32  
 TYROBP SRGN  
 EGR2 CCNE1  
 PRTN3 IDO1 TLR3  
 XAF1 MELK  
 SYNGR2 HELZ2  
 CD58 TREM2  
 EIF2AK2 VAMP5  
 HLA-F ZNFX1  
 LGALS9 HLA-E  
 CHRNA3 MX2  
 CASP1 PSMG2  
 AMBRA1 UBD HLA-  
 A JUNB DSN1  
 SHISA5 RGS10  
 TESPA1 SYT4  
 SAMHD1 BOLA3  
 ZNF831 ECT2  
 RASSF3 CSH1  
 GBP2

intracellular  
organelle

GO

109

12230

0.0006  
50546

0.0214  
72676

|                 |    |    |      |        |        |                   |
|-----------------|----|----|------|--------|--------|-------------------|
|                 |    |    |      |        |        | IFITM1 OASL MX1   |
|                 |    |    |      |        |        | CXCL10 OAS3 RTP4  |
|                 |    |    |      |        |        | IFI6 PLSCR1 TAP2  |
|                 |    |    |      |        |        | OAS2 TRIM69 B2M   |
|                 |    |    |      |        |        | SLC15A3 RSAD2     |
|                 |    |    |      |        |        | HLA-G FCGR1A      |
|                 |    |    |      |        |        | LAMP3 IFI27 IFI30 |
|                 |    |    |      |        |        | CXCL9 DDX58       |
|                 |    |    |      |        |        | RNF19B TAP1       |
|                 |    |    |      |        |        | IFI27L1 KIR2DL3   |
|                 |    |    |      |        |        | OR4C15 IFI16 PML  |
|                 |    |    |      |        |        | BCL2A1 LILRA2     |
|                 |    |    |      |        |        | MSRA RNF213       |
|                 |    |    |      |        |        | BIRC3 HLA-C       |
|                 |    |    |      |        |        | KPNA2 NCAPG       |
|                 |    |    |      |        |        | UQCRHL MRPS18C    |
|                 |    |    |      |        |        | GBP1 GBP4         |
|                 |    |    |      |        |        | ATP6V1F UNC93B1   |
|                 |    |    |      |        |        | RAB32 TYROBP      |
|                 |    |    |      |        |        | SRGN PRTN3 TLR3   |
|                 |    |    |      |        |        | ORAI2 MELK RGS1   |
|                 |    |    |      |        |        | SYNGR2 HELZ2      |
|                 |    |    |      |        |        | CD58 CD83 TREM2   |
|                 |    |    |      |        |        | SMIM13 EIF2AK2    |
|                 |    |    |      |        |        | RARRES3 VAMP5     |
|                 |    |    |      |        |        | HLA-F IL6 HLA-E   |
|                 |    |    |      |        |        | CHRNA3 MX2        |
|                 |    |    |      |        |        | AMBRA1 OR2B6      |
|                 |    |    |      |        |        | KIR2DL2 CLEC4E    |
|                 |    |    |      |        |        | TNFSF4 HLA-A      |
|                 |    |    |      |        |        | GNA15 SPRR2A      |
|                 |    |    |      |        |        | SHISA5 KLRD1      |
|                 |    |    |      |        |        | RGS10 HCST        |
|                 |    |    |      |        |        | TESPA1 SYT4       |
|                 |    |    |      |        |        | SAMHD1 OR4C45     |
|                 |    |    |      | 0.0006 | 0.0223 | OR52E8 RASSF3     |
| membrane        | GO | 83 | 8951 | 85283  | 69431  | GBP2              |
|                 |    |    |      |        |        | MX1 TAP2 TAP1     |
|                 |    |    |      |        |        | TTF2 RNF213 GBP1  |
| nucleotide      |    |    |      |        |        | GBP4 ATP6V1F      |
| catabolic       |    |    |      | 0.0006 | 0.0223 | RAB32 MX2 GNA15   |
| process         | GO | 13 | 741  | 8535   | 69431  | SAMHD1 GBP2       |
|                 |    |    |      |        |        | MX1 IFI44L GBP1   |
|                 |    |    |      |        |        | GBP4 RAB32 MX2    |
| guanyl          |    |    |      | 0.0006 | 0.0223 | GNA15 SAMHD1      |
| nucleotide      | GO | 9  | 390  | 8252   | 69431  | GBP2              |
| binding         |    |    |      |        |        |                   |
| regulation of   |    |    |      |        |        |                   |
| protein         |    |    |      |        |        | ISG15 PSMB9 NMI   |
| modification by |    |    |      | 0.0006 | 0.0223 | PML BIRC3 LCMT1   |
| small protein   | GO | 8  | 312  | 84016  | 69431  | PSMG2 SVBP        |

|                                                                     |      |     |       |                 |                 |                                                                                                                                                                                      |
|---------------------------------------------------------------------|------|-----|-------|-----------------|-----------------|--------------------------------------------------------------------------------------------------------------------------------------------------------------------------------------|
| conjugation or removal                                              |      |     |       |                 |                 | B2M HLA-G HLA-C<br>GBP1 GBP4<br>UNC93B1 RAB32<br>SRGN TLR3 VAMP5                                                                                                                     |
| Golgi apparatus part                                                | GO   | 15  | 934   | 0.0006<br>91557 | 0.0225<br>037   | HLA-F HLA-E HLA-A<br>SYT4 GBP2<br>HLA-G PSMB9<br>FCGR1A DDX58<br>IFIH1 BIRC3                                                                                                         |
| immune response-regulating signaling pathway                        | GO   | 10  | 475   | 0.0007<br>09563 | 0.0230<br>48893 | UNC93B1 TLR3<br>LGALS9 CLEC4E<br>MX1 TAP2 TAP1<br>TTF2 RNF213 GBP1<br>GBP4 ATP6V1F                                                                                                   |
| nucleoside phosphate catabolic process                              | GO   | 13  | 746   | 0.0007<br>27081 | 0.0235<br>21831 | RAB32 MX2 GNA15<br>SAMHD1 GBP2                                                                                                                                                       |
| regulation of tumor necrosis factor superfamily cytokine production | GO   | 5   | 115   | 0.0007<br>27953 | 0.0235<br>21831 | ZFP36 TLR3 CCL4<br>LGALS9 HLA-E<br>IFITM1 CXCL11<br>CXCL10 CXCL9<br>DDX58 SP100 PML<br>TRIM31 XCL2 CCL4                                                                              |
| regulation of locomotion                                            | GO   | 14  | 843   | 0.0007<br>40665 | 0.0238<br>90678 | IL6 LGALS9 CCL20<br>SVBP<br>OAS2 TRIM69<br>SP110 DDX58 OAS1<br>RNF19B TRIM22<br>PML TTF2 IFIH1<br>RNF213 BIRC3<br>TRIM31 XAF1                                                        |
| zinc ion binding                                                    | GO   | 17  | 1143  | 0.0007<br>48501 | 0.0241<br>01225 | TRIM48 ZNFX1<br>SAMHD1                                                                                                                                                               |
| Transcriptional misregulation in cancer                             | KEGG | 6   | 176   | 0.0007<br>59148 | 0.0243<br>58863 | FCGR1A ETV7 PML<br>BCL2A1 BIRC3 IL6<br>ISG15 IFITM1 OASL<br>CMPK2 HERC6<br>CXCL11 MX1 DDX60<br>IFI35 CXCL10 OAS3<br>SOCS1 STAT1<br>IFI44L RTP4 IFI6<br>PLSCR1 TAP2<br>HERC5 PPA1 MDK |
| cellular_component                                                  | GO   | 149 | 17527 | 0.0007<br>68571 | 0.0245<br>32999 | OAS2 UBE2L6<br>TRIM69 IFIT3 B2M                                                                                                                                                      |

SLC15A3 RSAD2  
HLA-G PSMB9 IFI44  
FCGR1A LAMP3  
IFI27 IFI30 CXCL9  
SP110 DDX58  
PARP12 OAS1  
ISG20 WARS  
RNF19B IRF9  
TDRD7 TAP1  
IFI27L1 CENPW NMI  
IFIT1 TRIM22  
DYNLT1 KIR2DL3  
OR4C15 IFI16 IFIT2  
TYMP ETV7 SP100  
PML BCL2A1 LILRA2  
TTF2 IFIH1 ZFP36  
RPL39L MSRA  
RNF213 BIRC3  
NFKBIE HLA-C  
KPNA2 NCAPG  
SAMD9L UQCRHL  
NT5C3A MRPS18C  
LCMT1 GBP1  
SAMD9 GBP4  
ATP6V1F TRIM31  
PGP UNC93B1  
RAB32 TYROBP  
SRGN APOL6 EGR2  
CCNE1 LAIR2  
PRTN3 IDO1 TLR3  
XAF1 ORAI2 MELK  
XCL2 RGS1  
SYNGR2 HELZ2  
CD58 CD83 TRIM48  
TREM2 SMIM13  
EIF2AK2 RARRES3  
CCL4 VAMP5 HLA-F  
ZNF1 IL6 LGALS9  
HLA-E CHRNA3 MX2  
CASP1 PSMG2  
AMBRA1 OR2B6  
KIR2DL2 UBD  
CLEC4E TNFSF4  
HLA-A GNA15 JUNB  
SPRR2A CCL20  
CCL3L3 DSN1  
SHISA5 KLRD1  
RGS10 HCST  
TESPA1 SYT4  
SAMHD1 OR4C45  
BOLA3 ZNF831

|                                                          |    |    |      |                 |                 |                                                                                                                                                                                                       |
|----------------------------------------------------------|----|----|------|-----------------|-----------------|-------------------------------------------------------------------------------------------------------------------------------------------------------------------------------------------------------|
|                                                          |    |    |      |                 |                 | ECT2 OR52E8<br>RASSF3 CSH1<br>GBP2 SVBP                                                                                                                                                               |
| positive regulation of homeostatic process               | GO | 7  | 245  | 0.0007<br>85636 | 0.0249<br>91091 | ISG15 CXCL11<br>CXCL10 STAT1<br>CXCL9 PML LGALS9<br>MX1 TAP2 TAP1<br>TTF2 RNF213 GBP1<br>GBP4 ATP6V1F                                                                                                 |
| ribonucleoside catabolic process                         | GO | 12 | 661  | 0.0008<br>02246 | 0.0254<br>31616 | RAB32 MX2 GNA15<br>GBP2<br>MX1 STAT1 HERC5<br>OAS2 LAMP3<br>NFKBIE GBP4<br>EIF2AK2 VAMP5                                                                                                              |
| perinuclear region of cytoplasm                          | GO | 12 | 661  | 0.0008<br>02246 | 0.0254<br>31616 | AMBRA1 SYT4<br>GBP2<br>CXCL10 PLSCR1<br>B2M RSAD2<br>DYNLT1 TYROBP<br>PRTN3 TLR3 CD58<br>IL6 HLA-E UBD                                                                                                |
| cell activation positive regulation of protein transport | GO | 16 | 1049 | 0.0008<br>04697 | 0.0254<br>65481 | CLEC4E TNFSF4<br>GNA15 DSN1<br>DDX58 TLR3 CD58<br>IL6 LGALS9 HLA-E                                                                                                                                    |
| negative regulation of cell differentiation              | GO | 10 | 484  | 0.0008<br>14128 | 0.0256<br>75693 | CASP1 CLEC4E<br>TNFSF4 ECT2<br>CXCL10 STAT1 B2M<br>HLA-G DYNLT1<br>ZFP36 GBP1 TLR3                                                                                                                    |
|                                                          |    | 12 | 663  | 0.0008<br>22557 | 0.0258<br>97181 | PRAMEF1 IL6<br>TNFSF4 SYT4<br>CMPK2 MX1<br>PLSCR1 TAP2 PPA1<br>OAS2 PSMB9 OAS1<br>TAP1 TYMP PML<br>TTF2 ZFP36 RNF213<br>UQCRHL NT5C3A<br>GBP1 GBP4<br>ATP6V1F PGP<br>RAB32 CCNE1 TLR3<br>MELK EIF2AK2 |
| phosphorus metabolic process                             | GO | 32 | 2739 | 0.0008<br>3905  | 0.0263<br>71364 | RARRES3 LGALS9<br>MX2 GNA15 HCST<br>SAMHD1 GBP2<br>ISG15 CXCL11<br>CXCL10 OAS3                                                                                                                        |
| extracellular region                                     | GO | 47 | 4559 | 0.0008<br>67403 | 0.0270<br>31861 | PLSCR1 TAP2 PPA1<br>MDK B2M PSMB9                                                                                                                                                                     |

|                                                     |    |    |      |                 |                 |                                                                                                                                                                                                                                                                                                                                                                                                                                                 |
|-----------------------------------------------------|----|----|------|-----------------|-----------------|-------------------------------------------------------------------------------------------------------------------------------------------------------------------------------------------------------------------------------------------------------------------------------------------------------------------------------------------------------------------------------------------------------------------------------------------------|
|                                                     |    |    |      |                 |                 | IFI30 CXCL9 OAS1<br>WARS TAP1 IFIT1<br>DYNLT1 LILRA2<br>MSRA HLA-C GBP1<br>ATP6V1F SRGN<br>APOL6 LAIR2<br>PRTN3 XCL2<br>SYNGR2 CD58<br>TREM2 CCL4<br>VAMP5 IL6 LGALS9<br>HLA-E CASP1<br>TNFSF4 HLA-A<br>CCL20 CCL3L3<br>DSN1 SHISA5 SYT4<br>BOLA3 CSH1 GBP2<br>SVBP<br>ISG15 HERC6 MX1<br>TAP2 HERC5 OAS2<br>UBE2L6 PSMB9<br>ISG20 RNF19B<br>TAP1 TYMP PML<br>TTF2 ZFP36 RNF213<br>NT5C3A GBP1<br>GBP4 ATP6V1F<br>RAB32 IDO1<br>RARRES3 MX2 UBD |
| organic<br>substance<br>catabolic<br>process        | GO | 28 | 2333 | 0.0008<br>79328 | 0.0273<br>11056 | GNA15 SAMHD1<br>GBP2<br>ISG15 CXCL10<br>SOCS1 HERC5<br>PSMB9 WARS NMI<br>PML BIRC3 LCMT1<br>GBP1 CCNE1 TLR3<br>XCL2 TREM2<br>EIF2AK2 CCL4 IL6<br>LGALS9 CHRNA3<br>PSMG2 CCL20<br>CCL3L3 ECT2 SVBP<br>SOCS1 HLA-G CD83<br>IL6 LGALS9 HLA-E<br>TNFSF4 HLA-A<br>TESPA1<br>MX1 TAP2 TAP1<br>TYMP TTF2 RNF213<br>NT5C3A GBP1<br>GBP4 ATP6V1F<br>RAB32 IDO1 MX2                                                                                       |
| regulation of<br>protein<br>modification<br>process | GO | 25 | 1973 | 0.0008<br>79246 | 0.0273<br>11056 | GNA15 SAMHD1<br>GBP2<br>CXCL11 CXCL10<br>PSMB9 CXCL9                                                                                                                                                                                                                                                                                                                                                                                            |
| positive<br>regulation of<br>cell adhesion          | GO | 9  | 405  | 0.0008<br>81876 | 0.0273<br>44085 |                                                                                                                                                                                                                                                                                                                                                                                                                                                 |
| organonitrogen<br>compound<br>catabolic<br>process  | GO | 16 | 1061 | 0.0009<br>01215 | 0.0274<br>73553 |                                                                                                                                                                                                                                                                                                                                                                                                                                                 |
| taxis                                               | GO | 14 | 860  | 0.0008<br>89378 | 0.0274<br>73553 |                                                                                                                                                                                                                                                                                                                                                                                                                                                 |

|                                                                                      |    |    |     |                 |                 |                                                                                                                        |
|--------------------------------------------------------------------------------------|----|----|-----|-----------------|-----------------|------------------------------------------------------------------------------------------------------------------------|
|                                                                                      |    |    |     |                 |                 | TYMP TYROBP<br>EGR2 XCL2 TREM2<br>CCL4 IL6 LGALS9<br>CCL20 CCL3L3<br>MX1 TAP2 TAP1<br>TTF2 RNF213 GBP1<br>GBP4 ATP6V1F |
| ribonucleotide<br>catabolic<br>process                                               | GO | 12 | 670 | 0.0008<br>9704  | 0.0274<br>73553 | RAB32 MX2 GNA15<br>GBP2<br>TAP2 TAP1 SAMD9L                                                                            |
| vesicle<br>organization                                                              | GO | 8  | 326 | 0.0008<br>99122 | 0.0274<br>73553 | SAMD9 RAB32<br>SRGN VAMP5 SYT4                                                                                         |
| positive<br>regulation of<br>peptide<br>secretion                                    | GO | 7  | 251 | 0.0009<br>0011  | 0.0274<br>73553 | CD58 IL6 LGALS9<br>HLA-E CASP1<br>CLEC4E TNFSF4                                                                        |
| regulation of<br>protein import<br>into nucleus                                      | GO | 6  | 182 | 0.0008<br>97399 | 0.0274<br>73553 | DDX58 NFKBIE<br>TLR3 IL6 LGALS9<br>ECT2<br>MX1 TAP2 TAP1<br>TYMP TTF2 RNF213<br>UQCRHL NT5C3A                          |
| nucleoside<br>metabolic<br>process                                                   | GO | 15 | 967 | 0.0009<br>64433 | 0.0288<br>35908 | GBP1 GBP4<br>ATP6V1F RAB32<br>MX2 GNA15 GBP2<br>SOCS1 HLA-G PML<br>GBP1 IDO1 CD83<br>IL6 LGALS9 HLA-E                  |
| regulation of<br>cell adhesion                                                       | GO | 12 | 677 | 0.0009<br>77034 | 0.0291<br>65339 | TNFSF4 HLA-A<br>TESPA1<br>B2M HLA-G<br>FCGR1A PML HLA-C                                                                |
| endosome<br>membrane<br>positive<br>regulation of<br>nucleocytoplas<br>mic transport | GO | 9  | 414 | 0.0010<br>22522 | 0.0302<br>2922  | TLR3 HLA-F HLA-E<br>HLA-A                                                                                              |
| regulation of<br>nucleocytoplas<br>mic transport                                     | GO | 5  | 125 | 0.0010<br>41579 | 0.0307<br>03294 | DDX58 TLR3 IL6<br>LGALS9 ECT2<br>HERC6 SOCS1<br>HERC5 UBE2L6<br>TRIM69 PSMB9<br>RNF19B TRIM22                          |
| protein<br>ubiquitination                                                            | GO | 12 | 684 | 0.0010<br>62848 | 0.0312<br>70812 | RNF213 BIRC3<br>TRIM31 UBD<br>DDX58 NFKBIE                                                                             |
| regulation of<br>protein import<br>activation of<br>immune<br>response               | GO | 6  | 189 | 0.0010<br>82267 | 0.0317<br>91374 | TLR3 IL6 LGALS9<br>ECT2<br>PSMB9 FCGR1A                                                                                |
|                                                                                      | GO | 10 | 504 | 0.0010<br>92068 | 0.0320<br>28186 | DDX58 IFI16 IFIH1<br>BIRC3 UNC93B1                                                                                     |

|                                                                                |    |    |      |                 |                 |                                                                                                                                                                                                                                                                                                                                                                                                                                                                                                                                                                                                |
|--------------------------------------------------------------------------------|----|----|------|-----------------|-----------------|------------------------------------------------------------------------------------------------------------------------------------------------------------------------------------------------------------------------------------------------------------------------------------------------------------------------------------------------------------------------------------------------------------------------------------------------------------------------------------------------------------------------------------------------------------------------------------------------|
|                                                                                |    |    |      |                 |                 | TLR3 LGALS9<br>CLEC4E<br>SOCS1 STAT1<br>PSMB9 IFIT1<br>ATP6V1F TLR3<br>TREM2 IL6 CHRNA3<br>TNFSF4 GNA15<br>RGS10 CSH1<br>HLA-G TAP1 HLA-C<br>KPNA2 HLA-F HLA-E<br>HLA-A<br>CMPK2 MX1 IFI6<br>OAS2 IFIT3 RSAD2<br>IFI27 OAS1 TDRD7<br>TAP1 BCL2A1 MSRA<br>UQCRHL NT5C3A<br>MRPS18C TRIM31<br>RAB32 XAF1 MX2<br>CASP1 AMBRA1<br>BOLA3<br>PLSCR1 TAP2 B2M<br>SLC15A3 RSAD2<br>HLA-G FCGR1A<br>LAMP3 IFI27 DDX58<br>TAP1 PML BCL2A1<br>BIRC3 HLA-C<br>ATP6V1F RAB32<br>TYROBP TLR3<br>SYNGR2 CD58 HLA-<br>F HLA-E CHRNA3<br>AMBRA1 HLA-A<br>SYT4<br>B2M HLA-G<br>FCGR1A HLA-C<br>HLA-F HLA-E HLA-A |
| cellular<br>response to<br>nitrogen<br>compound                                | GO | 13 | 785  | 0.0011<br>31582 | 0.0329<br>7702  |                                                                                                                                                                                                                                                                                                                                                                                                                                                                                                                                                                                                |
| peptide<br>binding                                                             | GO | 7  | 263  | 0.0011<br>6816  | 0.0338<br>28872 |                                                                                                                                                                                                                                                                                                                                                                                                                                                                                                                                                                                                |
| mitochondrion                                                                  | GO | 22 | 1712 | 0.0011<br>94963 | 0.0345<br>50737 |                                                                                                                                                                                                                                                                                                                                                                                                                                                                                                                                                                                                |
| whole<br>membrane                                                              | GO | 27 | 2266 | 0.0012<br>00466 | 0.0346<br>55447 |                                                                                                                                                                                                                                                                                                                                                                                                                                                                                                                                                                                                |
| coated vesicle<br>guanosine-<br>containing<br>compound<br>catabolic<br>process | GO | 7  | 265  | 0.0012<br>18321 | 0.0350<br>60988 |                                                                                                                                                                                                                                                                                                                                                                                                                                                                                                                                                                                                |
| glycosyl<br>compound<br>metabolic<br>process                                   | GO | 15 | 992  | 0.0012<br>26961 | 0.0352<br>54557 |                                                                                                                                                                                                                                                                                                                                                                                                                                                                                                                                                                                                |
| organophosph<br>ate catabolic<br>process                                       | GO | 13 | 793  | 0.0012<br>34214 | 0.0354<br>07704 |                                                                                                                                                                                                                                                                                                                                                                                                                                                                                                                                                                                                |



|                                                                         |    |    |      |                 |                 |                                                                                                                                                                                                             |
|-------------------------------------------------------------------------|----|----|------|-----------------|-----------------|-------------------------------------------------------------------------------------------------------------------------------------------------------------------------------------------------------------|
|                                                                         |    |    |      |                 |                 | ISG15 HERC6 MX1<br>TAP2 HERC5 OAS2<br>UBE2L6 PSMB9<br>ISG20 RNF19B<br>TAP1 IFI16 TYMP<br>PML TTF2 ZFP36<br>RNF213 NT5C3A<br>GBP1 GBP4<br>ATP6V1F RAB32<br>IDO1 MX2 AMBRA1                                   |
| cellular<br>catabolic<br>process                                        | GO | 29 | 2505 | 0.0012<br>90165 | 0.0369<br>40719 | UBD GNA15<br>SAMHD1 GBP2<br>ISG15 STAT1 B2M                                                                                                                                                                 |
| regulation of<br>myeloid cell<br>differentiation                        | GO | 6  | 196  | 0.0012<br>94945 | 0.0369<br>40719 | ZFP36 TYROBP<br>TLR3                                                                                                                                                                                        |
| myeloid cell<br>differentiation                                         | GO | 6  | 197  | 0.0013<br>27751 | 0.0376<br>80291 | IFI16 PML PRTN3<br>LGALS9 UBD JUNB<br>CXCL10 STAT1<br>PLSCR1 MDK<br>PSMB9 LAMP3 IFI27<br>DDX58 WARS<br>RNF19B NMI<br>TRIM22 IFI16 SP100<br>PML ZFP36 BIRC3<br>TRIM31 EGR2<br>CCNE1 TLR3 XCL2<br>HELZ2 TREM2 |
| positive<br>regulation of<br>macromolecul<br>e metabolic<br>process     | GO | 35 | 3220 | 0.0013<br>48446 | 0.0382<br>08733 | EIF2AK2 CCL4 IL6<br>LGALS9 CHRNA3<br>CASP1 TNFSF4<br>JUNB CCL20<br>CCL3L3 ECT2                                                                                                                              |
| positive<br>regulation of<br>lymphocyte<br>proliferation                | GO | 5  | 133  | 0.0013<br>56817 | 0.0383<br>28012 | IL6 LGALS9 HLA-E<br>TNFSF4 HLA-A                                                                                                                                                                            |
| positive<br>regulation of<br>cysteine-type<br>endopeptidase<br>activity | GO | 5  | 133  | 0.0013<br>56817 | 0.0383<br>28012 | IFI27 IFI16 PML<br>LGALS9 CASP1<br>STAT1 PLSCR1 B2M<br>PSMB9 IFI27 DDX58<br>TRIM22 IFI16 SP100<br>PML TRIM31 TLR3<br>XCL2 RGS1                                                                              |
| positive<br>regulation of<br>molecular<br>function                      | GO | 26 | 2133 | 0.0013<br>89462 | 0.0391<br>30132 | EIF2AK2 CCL4 IL6<br>LGALS9 CHRNA3<br>CASP1 AMBRA1<br>GNA15 CCL20                                                                                                                                            |

|                                                                |    |    |      |                 |                 | CCL3L3 RGS10<br>ECT2                                                                                                                                         |
|----------------------------------------------------------------|----|----|------|-----------------|-----------------|--------------------------------------------------------------------------------------------------------------------------------------------------------------|
| positive regulation of mononuclear cell proliferation          | GO | 5  | 135  | 0.0014<br>45514 | 0.0401<br>94512 | IL6 LGALS9 HLA-E<br>TNFSF4 HLA-A                                                                                                                             |
| purine nucleoside catabolic process                            | GO | 7  | 274  | 0.0014<br>6521  | 0.0403<br>98553 | MX1 GBP1 GBP4<br>RAB32 MX2 GNA15<br>GBP2                                                                                                                     |
| purine ribonucleoside catabolic process                        | GO | 7  | 274  | 0.0014<br>6521  | 0.0403<br>98553 | MX1 GBP1 GBP4<br>RAB32 MX2 GNA15<br>GBP2<br>CXCL10 SOCS1<br>HERC5 WARS PML<br>GBP1 CCNE1 TLR3<br>XCL2 TREM2<br>EIF2AK2 CCL4 IL6<br>LGALS9 CHRNA3             |
| regulation of phosphorylation                                  | GO | 19 | 1427 | 0.0014<br>80216 | 0.0407<br>51301 | AMBRA1 CCL20<br>CCL3L3 ECT2                                                                                                                                  |
| positive regulation of NF-kappaB transcription factor activity | GO | 5  | 136  | 0.0014<br>91424 | 0.0409<br>98587 | TRIM22 TLR3<br>EIF2AK2 IL6<br>LGALS9<br>SOCS1 STAT1<br>PSMB9 DDX58 NMI<br>IFI16 SP100 PML<br>BCL2A1 IFIH1<br>ZFP36 BIRC3 RAB32<br>TYROBP TLR3<br>MELK LGALS9 |
| intracellular signal transduction                              | GO | 21 | 1623 | 0.0015<br>1093  | 0.0414<br>72885 | CCL20 SHISA5<br>ECT2 CSH1<br>MX1 GBP1 GBP4                                                                                                                   |
| GTPase activity                                                | GO | 7  | 276  | 0.0015<br>25006 | 0.0417<br>34851 | RAB32 MX2 GNA15<br>GBP2                                                                                                                                      |
| positive regulation of protein localization to nucleus         | GO | 5  | 137  | 0.0015<br>38396 | 0.0420<br>3885  | DDX58 TLR3 IL6<br>LGALS9 ECT2<br>MX1 TAP2 TAP1<br>TTF2 RNF213<br>UQCRHL NT5C3A<br>GBP1 GBP4                                                                  |
| purine ribonucleoside metabolic process                        | GO | 14 | 917  | 0.0015<br>82614 | 0.0431<br>83083 | ATP6V1F RAB32<br>MX2 GNA15 GBP2                                                                                                                              |

|                                                      |    |    |      |                 |                 |                                                                                                                                                                                                                   |
|------------------------------------------------------|----|----|------|-----------------|-----------------|-------------------------------------------------------------------------------------------------------------------------------------------------------------------------------------------------------------------|
| purine nucleoside metabolic process                  | GO | 14 | 920  | 0.0016<br>28915 | 0.0443<br>76297 | MX1 TAP2 TAP1<br>TTF2 RNF213<br>UQCRHL NT5C3A<br>GBP1 GBP4<br>ATP6V1F RAB32<br>MX2 GNA15 GBP2<br>IFITM1 CXCL11<br>CXCL10 CXCL9<br>DDX58 SP100 XCL2                                                                |
| regulation of cell migration                         | GO | 12 | 723  | 0.0016<br>62801 | 0.0451<br>03772 | CCL4 IL6 LGALS9<br>CCL20 SVBP<br>MX1 TAP2 TAP1<br>TTF2 RNF213<br>UQCRHL GBP1<br>GBP4 ATP6V1F                                                                                                                      |
| purine ribonucleoside triphosphate metabolic process | GO | 13 | 824  | 0.0017<br>07575 | 0.0462<br>50167 | RAB32 MX2 GNA15<br>GBP2<br>ISG15 CXCL10<br>SOCS1 IFI6 HERC5<br>PSMB9 LAMP3 IFI27<br>WARS RNF19B NMI<br>IFI16 PML ZFP36<br>BIRC3 LCMT1 GBP1<br>CCNE1 TLR3 XCL2<br>TREM2 EIF2AK2<br>CCL4 IL6 LGALS9<br>CHRNA3 CASP1 |
| regulation of protein metabolic process              | GO | 32 | 2899 | 0.0017<br>53234 | 0.0473<br>47595 | PSMG2 CCL20<br>CCL3L3 ECT2 SVBP<br>CXCL10 SOCS1<br>HERC5 WARS PML<br>GBP1 CCNE1 TLR3<br>XCL2 TREM2<br>EIF2AK2 CCL4 IL6<br>LGALS9 CHRNA3                                                                           |
| regulation of protein phosphorylation                | GO | 18 | 1334 | 0.0017<br>52488 | 0.0473<br>47595 | CCL20 CCL3L3<br>ECT2                                                                                                                                                                                              |
| positive regulation of intracellular transport       | GO | 8  | 364  | 0.0017<br>63452 | 0.0474<br>40687 | CXCL11 CXCL10<br>CXCL9 DDX58 TLR3<br>IL6 LGALS9 ECT2                                                                                                                                                              |
| immune response-activating signal transduction       | GO | 9  | 450  | 0.0017<br>76751 | 0.0475<br>64234 | PSMB9 FCGR1A<br>DDX58 IFIH1 BIRC3<br>UNC93B1 TLR3<br>LGALS9 CLEC4E<br>MX1 PLSCR1 TAP2<br>OAS2 TRIM69 B2M<br>RSAD2 HLA-G                                                                                           |
| endomembrane system                                  | GO | 43 | 4267 | 0.0018<br>06778 | 0.0482<br>97889 | FCGR1A LAMP3<br>IFI27 OAS1 TAP1                                                                                                                                                                                   |

|                                                                                                                                                                                                      |    |    |      |                 |                 |                                                                                                                                                                                                                                                                                                                 |
|------------------------------------------------------------------------------------------------------------------------------------------------------------------------------------------------------|----|----|------|-----------------|-----------------|-----------------------------------------------------------------------------------------------------------------------------------------------------------------------------------------------------------------------------------------------------------------------------------------------------------------|
|                                                                                                                                                                                                      |    |    |      |                 |                 | DYNLT1 IFIT2 PML<br>NFKBIE HLA-C<br>KPNA2 SAMD9L<br>NT5C3A GBP1<br>SAMD9 GBP4<br>UNC93B1 RAB32<br>TYROBP SRGN<br>PRTN3 TLR3<br>SYNGR2 CD58<br>VAMP5 HLA-F HLA-<br>E MX2 HLA-A DSN1<br>SHISA5 TESPA1<br>SYT4 CSH1 GBP2<br>MX1 TAP2 TAP1<br>TTF2 RNF213<br>UQCRHL GBP1<br>GBP4 ATP6V1F<br>RAB32 MX2 GNA15<br>GBP2 |
| ribonucleoside<br>triphosphate<br>metabolic<br>process<br>positive<br>regulation of<br>establishment<br>of protein<br>localization<br>regulation of<br>cytokine-<br>mediated<br>signaling<br>pathway | GO | 13 | 830  | 0.0018<br>14528 | 0.0484<br>34752 | DDX58 TLR3 CD58<br>IL6 LGALS9 HLA-E<br>CASP1 CLEC4E<br>TNFSF4 ECT2<br>SOCS1 STAT1<br>BIRC3 TREM2 IL6<br>CXCL11 CXCL10<br>STAT1 MDK PSMB9<br>LAMP3 CXCL9<br>DYNLT1 TYMP PML<br>TYROBP EGR2<br>XCL2 CD58 TREM2<br>CCL4 IL6 LGALS9<br>CCL20 CCL3L3<br>MX1 IFI44L GBP1<br>GBP4 RAB32 MX2<br>GNA15 GBP2              |
| locomotion                                                                                                                                                                                           | GO | 20 | 1516 | 0.0018<br>65367 | 0.0495<br>76231 |                                                                                                                                                                                                                                                                                                                 |
| GTP binding                                                                                                                                                                                          | GO | 8  | 368  | 0.0018<br>83164 | 0.0498<br>33504 |                                                                                                                                                                                                                                                                                                                 |

Supplementary Table 4: List of significantly upregulated pathways

| Pathway               | Database | Genes in list | Genes in pathway | P value | Adj pval | Genes                                                                                                                                                                                                                                                                                                                                                                                                                                                                                                                                                                      |
|-----------------------|----------|---------------|------------------|---------|----------|----------------------------------------------------------------------------------------------------------------------------------------------------------------------------------------------------------------------------------------------------------------------------------------------------------------------------------------------------------------------------------------------------------------------------------------------------------------------------------------------------------------------------------------------------------------------------|
| immune system process | GO       | 80            | 2418             | <1E-18  | <1E-18   | ISG15 IFITM1 OASL<br>HERC6 CXCL11 MX1<br>DDX60 IFI35 CXCL10<br>OAS3 STAT1 IFI44L<br>IFI6 PLSCR1 TAP2<br>HERC5 OAS2 IFIT3<br>B2M RSAD2 HLA-G<br>PSMB9 FCGR1A<br>LAMP3 IFI27 IFI30<br>CXCL9 DDX58 OAS1<br>ISG20 RNF19B IRF9<br>TAP1 NMI IFIT1<br>TRIM22 DYNLT1<br>KIR2DL3 IFI16 IFIT2<br>SP100 PML LILRA2<br>IFIH1 BIRC3 HLA-C<br>HMHB1 GBP1<br>TRIM31 UNC93B1<br>RAB32 TYROBP<br>PRTN3 IDO1 TLR3<br>XAF1 MELK XCL2<br>RGS1 CD58 CD83<br>TREM2 EIF2AK2<br>CCL4 HLA-F IL6<br>LGALS9 HLA-E MX2<br>UBD CLEC4E<br>TNFSF4 HLA-A JUNB<br>CCL20 CCL3L3 DSN1<br>KLRD1 SAMHD1<br>GBP2 |
| Immune System         | REACTOME | 80            | 2050             | <1E-18  | <1E-18   | ISG15 IFITM1 OASL<br>HERC6 MX1 IFI35<br>CXCL10 OAS3<br>SOCS1 STAT1 IFI6<br>TAP2 HERC5 OAS2<br>UBE2L6 TRIM69<br>IFIT3 B2M RSAD2<br>HLA-G PSMB9<br>FCGR1A IFI27 IFI30<br>DDX58 OAS1 ISG20<br>RNF19B IRF9 TAP1<br>IFIT1 TRIM22<br>DYNLT1 KIR2DL3<br>IFI16 IFIT2 SP100<br>PML LILRA2 IFIH1<br>RNF213 BIRC3                                                                                                                                                                                                                                                                     |

|                  |    |    |      |        |        |                                                                                                                                                                                                                                                                                                                                                                                                                                                                                                                                                                                                                                                                                                                                                                                            |
|------------------|----|----|------|--------|--------|--------------------------------------------------------------------------------------------------------------------------------------------------------------------------------------------------------------------------------------------------------------------------------------------------------------------------------------------------------------------------------------------------------------------------------------------------------------------------------------------------------------------------------------------------------------------------------------------------------------------------------------------------------------------------------------------------------------------------------------------------------------------------------------------|
|                  |    |    |      |        |        | NFKBIE HLA-C<br>KPNA2 GBP1 GBP4<br>ATP6V1F TRIM31<br>UNC93B1 TYROBP<br>LAIR2 PRTN3 TLR3<br>XAF1 ORAI2 CD58<br>TRIM48 TREM2<br>EIF2AK2 CCL4 HLA-F<br>IL6 LGALS9 HLA-E<br>MX2 CASP1 KIR2DL2<br>CLEC4E TNFSF4<br>HLA-A JUNB CCL20<br>CCL3L3 DSN1<br>KLRD1 HCST<br>SAMHD1 CSH1<br>GBP2<br>ISG15 IFITM1 OASL<br>CXCL11 MX1 DDX60<br>IFI35 CXCL10 OAS3<br>STAT1 IFI6 TAP2<br>HERC5 OAS2 IFIT3<br>B2M RSAD2 HLA-G<br>FCGR1A LAMP3<br>IFI27 IFI30 CXCL9<br>DDX58 OAS1 ISG20<br>RNF19B IRF9 TAP1<br>NMI IFIT1 TRIM22<br>DYNLT1 KIR2DL3<br>IFI16 IFIT2 SP100<br>PML LILRA2 IFIH1<br>HLA-C HMHB1 GBP1<br>TRIM31 UNC93B1<br>TYROBP PRTN3<br>TLR3 XAF1 XCL2<br>RGS1 CD58 CD83<br>TREM2 EIF2AK2<br>CCL4 HLA-F IL6<br>LGALS9 HLA-E MX2<br>UBD CLEC4E<br>TNFSF4 HLA-A<br>CCL20 CCL3L3 DSN1<br>KLRD1 SAMHD1 |
| immune response  | GO | 71 | 1492 | <1E-18 | <1E-18 | GBP2<br>ISG15 IFITM1 OASL<br>CXCL11 MX1 DDX60<br>IFI35 CXCL10 OAS3<br>STAT1 IFI44L IFI6<br>PLSCR1 HERC5<br>MDK OAS2 IFIT3<br>B2M RSAD2 HLA-G<br>FCGR1A IFI27 IFI30                                                                                                                                                                                                                                                                                                                                                                                                                                                                                                                                                                                                                         |
| defense response | GO | 67 | 1247 | <1E-18 | <1E-18 |                                                                                                                                                                                                                                                                                                                                                                                                                                                                                                                                                                                                                                                                                                                                                                                            |

|                                              |              |    |     |        |        |                                                                                                                                                                                                                                                                                                                                                                                                                                                                                                                                                                                                                                                                                                                                                                                                                                                                                                                                                                                              |
|----------------------------------------------|--------------|----|-----|--------|--------|----------------------------------------------------------------------------------------------------------------------------------------------------------------------------------------------------------------------------------------------------------------------------------------------------------------------------------------------------------------------------------------------------------------------------------------------------------------------------------------------------------------------------------------------------------------------------------------------------------------------------------------------------------------------------------------------------------------------------------------------------------------------------------------------------------------------------------------------------------------------------------------------------------------------------------------------------------------------------------------------|
|                                              |              |    |     |        |        | CXCL9 DDX58 HCP5<br>OAS1 ISG20 IRF9<br>TAP1 NMI IFIT1<br>TRIM22 IFI16 IFIT2<br>SP100 PML LILRA2<br>IFIH1 HLA-C GBP1<br>TRIM31 UNC93B1<br>TYROBP IDO1 TLR3<br>XAF1 XCL2 CD58<br>CD83 TREM2<br>EIF2AK2 CCL4 HLA-F<br>IL6 LGALS9 HLA-E<br>MX2 UBD CLEC4E<br>TNFSF4 HLA-A<br>CCL20 CCL3L3<br>KLRD1 SAMHD1<br>GBP2<br>ISG15 IFITM1 OASL<br>CXCL11 MX1 IFI35<br>CXCL10 OAS3<br>SOCS1 STAT1 IFI6<br>PLSCR1 OAS2 IFIT3<br>B2M RSAD2 HLA-G<br>PSMB9 FCGR1A<br>LAMP3 IFI27 IFI30<br>CXCL9 OAS1 ISG20<br>IRF9 NMI IFIT1<br>TRIM22 IFIT2 SP100<br>PML ZFP36 BIRC3<br>HLA-C GBP1 TRIM31<br>CCNE1 TLR3 XAF1<br>XCL2 CD58 EIF2AK2<br>CCL4 HLA-F IL6<br>LGALS9 HLA-E MX2<br>UBD TNFSF4 HLA-A<br>JUNB CCL20 CCL3L3<br>SAMHD1 GBP2<br>ISG15 IFITM1 OASL<br>MX1 IFI35 CXCL10<br>OAS3 SOCS1 STAT1<br>IFI6 HERC5 OAS2<br>UBE2L6 IFIT3 B2M<br>RSAD2 HLA-G<br>PSMB9 FCGR1A<br>IFI27 IFI30 DDX58<br>OAS1 ISG20 IRF9<br>IFIT1 TRIM22 IFIT2<br>SP100 PML BIRC3<br>HLA-C KPNA2 GBP1<br>GBP4 TRIM31<br>PRTN3 XAF1 TRIM48 |
| response to<br>cytokine                      | GO           | 57 | 762 | <1E-18 | <1E-18 |                                                                                                                                                                                                                                                                                                                                                                                                                                                                                                                                                                                                                                                                                                                                                                                                                                                                                                                                                                                              |
| Cytokine<br>Signaling in<br>Immune<br>system | REACTO<br>ME | 55 | 741 | <1E-18 | <1E-18 |                                                                                                                                                                                                                                                                                                                                                                                                                                                                                                                                                                                                                                                                                                                                                                                                                                                                                                                                                                                              |

|                                               |    |    |     |        |        |                                                                                                                                                                                                                                                                                                                                                                                                                                                                                             |
|-----------------------------------------------|----|----|-----|--------|--------|---------------------------------------------------------------------------------------------------------------------------------------------------------------------------------------------------------------------------------------------------------------------------------------------------------------------------------------------------------------------------------------------------------------------------------------------------------------------------------------------|
|                                               |    |    |     |        |        | EIF2AK2 CCL4 HLA-F<br>IL6 LGALS9 HLA-E<br>MX2 CASP1 TNFSF4<br>HLA-A JUNB CCL20<br>CCL3L3 SAMHD1<br>CSH1 GBP2<br>ISG15 IFITM1 OASL<br>MX1 DDX60 IFI35<br>OAS3 STAT1 IFI6<br>HERC5 OAS2 IFIT3<br>B2M RSAD2 HLA-G<br>FCGR1A IFI27 IFI30<br>DDX58 OAS1 ISG20<br>IRF9 NMI IFIT1<br>TRIM22 IFI16 IFIT2<br>SP100 PML IFIH1<br>HLA-C GBP1 TRIM31<br>UNC93B1 TYROBP<br>TLR3 XAF1 XCL2<br>CD58 TREM2<br>EIF2AK2 CCL4 HLA-F<br>LGALS9 HLA-E MX2<br>UBD CLEC4E HLA-A<br>CCL20 CCL3L3<br>KLRD1 SAMHD1    |
| innate<br>immune<br>response                  | GO | 54 | 611 | <1E-18 | <1E-18 | GBP2<br>ISG15 IFITM1 OASL<br>CMPK2 CXCL11 MX1<br>DDX60 CXCL10<br>OAS3 SOCS1 STAT1<br>IFI44L PLSCR1<br>HERC5 OAS2 IFIT3<br>B2M RSAD2 PSMB9<br>IFI44 CXCL9 DDX58<br>OAS1 ISG20 IRF9<br>IFIT1 TRIM22 IFI16<br>IFIT2 PML IFIH1<br>ZFP36 GBP1<br>UNC93B1 PRTN3<br>IDO1 TLR3 TREM2<br>EIF2AK2 CCL4 IL6<br>LGALS9 HLA-E MX2<br>CASP1 CLEC4E<br>TNFSF4 HLA-A JUNB<br>CCL20 SAMHD1<br>ISG15 IFITM1 OASL<br>CMPK2 CXCL11 MX1<br>DDX60 CXCL10<br>OAS3 SOCS1 STAT1<br>IFI44L PLSCR1<br>HERC5 OAS2 IFIT3 |
| response to<br>biotic<br>stimulus             | GO | 51 | 921 | <1E-18 | <1E-18 |                                                                                                                                                                                                                                                                                                                                                                                                                                                                                             |
| response to<br>external<br>biotic<br>stimulus | GO | 51 | 889 | <1E-18 | <1E-18 |                                                                                                                                                                                                                                                                                                                                                                                                                                                                                             |



|                                                 |    |    |     |        |        |                                                                                                                                                                                                                                                                                                                                                                                                                                                                                                                                                                                                                                                                                                                                                                                                                                                                                                                                                                                  |
|-------------------------------------------------|----|----|-----|--------|--------|----------------------------------------------------------------------------------------------------------------------------------------------------------------------------------------------------------------------------------------------------------------------------------------------------------------------------------------------------------------------------------------------------------------------------------------------------------------------------------------------------------------------------------------------------------------------------------------------------------------------------------------------------------------------------------------------------------------------------------------------------------------------------------------------------------------------------------------------------------------------------------------------------------------------------------------------------------------------------------|
|                                                 |    |    |     |        |        | B2M RSAD2 PSMB9<br>IFI44 CXCL9 DDX58<br>OAS1 ISG20 IRF9<br>IFIT1 TRIM22 IFI16<br>IFIT2 PML IFIH1<br>ZFP36 GBP1<br>UNC93B1 PRTN3<br>IDO1 TLR3 TREM2<br>EIF2AK2 CCL4 IL6<br>LGALS9 HLA-E MX2<br>CASP1 CLEC4E<br>TNFSF4 HLA-A JUNB<br>CCL20 SAMHD1<br>ISG15 IFITM1 OASL<br>CMPK2 CXCL11 MX1<br>DDX60 CXCL10<br>OAS3 SOCS1 STAT1<br>IFI44L PLSCR1<br>HERC5 OAS2 IFIT3<br>B2M RSAD2 PSMB9<br>IFI44 CXCL9 DDX58<br>OAS1 ISG20 IRF9<br>IFIT1 TRIM22 IFI16<br>IFIT2 PML IFIH1<br>ZFP36 GBP1<br>UNC93B1 PRTN3<br>IDO1 TLR3 TREM2<br>EIF2AK2 CCL4 IL6<br>LGALS9 HLA-E MX2<br>CASP1 CLEC4E<br>TNFSF4 HLA-A JUNB<br>CCL20 SAMHD1<br>ISG15 IFITM1 OASL<br>CXCL11 MX1 IFI35<br>CXCL10 OAS3<br>SOCS1 STAT1 IFI6<br>OAS2 IFIT3 B2M<br>RSAD2 HLA-G<br>PSMB9 FCGR1A<br>IFI27 IFI30 CXCL9<br>OAS1 ISG20 IRF9<br>NMI IFIT1 TRIM22<br>IFIT2 SP100 PML<br>ZFP36 BIRC3 HLA-C<br>GBP1 TRIM31 TLR3<br>XAF1 XCL2 CD58<br>CCL4 HLA-F IL6<br>LGALS9 HLA-E MX2<br>TNFSF4 HLA-A<br>CCL20 CCL3L3<br>SAMHD1 GBP2 |
| response to<br>other<br>organism                | GO | 51 | 886 | <1E-18 | <1E-18 |                                                                                                                                                                                                                                                                                                                                                                                                                                                                                                                                                                                                                                                                                                                                                                                                                                                                                                                                                                                  |
| cellular<br>response to<br>cytokine<br>stimulus | GO | 51 | 657 | <1E-18 | <1E-18 |                                                                                                                                                                                                                                                                                                                                                                                                                                                                                                                                                                                                                                                                                                                                                                                                                                                                                                                                                                                  |

|                                                      |    |    |     |        |        |                                                                                                                                                                                                                                                                                                                                       |
|------------------------------------------------------|----|----|-----|--------|--------|---------------------------------------------------------------------------------------------------------------------------------------------------------------------------------------------------------------------------------------------------------------------------------------------------------------------------------------|
| multi-organism cellular process                      | GO | 47 | 967 | <1E-18 | <1E-18 | ISG15 IFITM1 OASL<br>MX1 DDX60 CXCL10<br>OAS3 STAT1 IFI44L<br>PLSCR1 TAP2<br>HERC5 OAS2 IFIT3<br>B2M RSAD2 PSMB9<br>IFI44 LAMP3 CXCL9<br>SP110 DDX58 OAS1<br>ISG20 IRF9 TAP1<br>IFIT1 TRIM22<br>DYNLT1 IFI16 IFIT2<br>SP100 PML IFIH1<br>HLA-C KPNA2 GBP1<br>UNC93B1 TLR3<br>EIF2AK2 CCL4 IL6<br>LGALS9 MX2<br>TNFSF4 HLA-A<br>SAMHD1 |
| interspecies interaction between organisms           | GO | 47 | 963 | <1E-18 | <1E-18 | ISG15 IFITM1 OASL<br>MX1 DDX60 CXCL10<br>OAS3 STAT1 IFI44L<br>PLSCR1 TAP2<br>HERC5 OAS2 IFIT3<br>B2M RSAD2 PSMB9<br>IFI44 LAMP3 CXCL9<br>SP110 DDX58 OAS1<br>ISG20 IRF9 TAP1<br>IFIT1 TRIM22<br>DYNLT1 IFI16 IFIT2<br>SP100 PML IFIH1<br>HLA-C KPNA2 GBP1<br>UNC93B1 TLR3<br>EIF2AK2 CCL4 IL6<br>LGALS9 MX2<br>TNFSF4 HLA-A<br>SAMHD1 |
| symbiosis, encompassing mutualism through parasitism | GO | 47 | 960 | <1E-18 | <1E-18 | ISG15 IFITM1 OASL<br>MX1 DDX60 CXCL10<br>OAS3 STAT1 IFI44L<br>PLSCR1 TAP2<br>HERC5 OAS2 IFIT3<br>B2M RSAD2 PSMB9<br>IFI44 LAMP3 CXCL9<br>SP110 DDX58 OAS1<br>ISG20 IRF9 TAP1<br>IFIT1 TRIM22<br>DYNLT1 IFI16 IFIT2<br>SP100 PML IFIH1<br>HLA-C KPNA2 GBP1<br>UNC93B1 TLR3<br>EIF2AK2 CCL4 IL6                                         |

|                                     |    |    |     |        |        |                                                                                                                                                                                                                                                                                                                                                                                                                                                                                                                                                                                                                                                                                                                                                                                                                                                                                                                                                                |
|-------------------------------------|----|----|-----|--------|--------|----------------------------------------------------------------------------------------------------------------------------------------------------------------------------------------------------------------------------------------------------------------------------------------------------------------------------------------------------------------------------------------------------------------------------------------------------------------------------------------------------------------------------------------------------------------------------------------------------------------------------------------------------------------------------------------------------------------------------------------------------------------------------------------------------------------------------------------------------------------------------------------------------------------------------------------------------------------|
| cytokine-mediated signaling pathway | GO | 47 | 473 | <1E-18 | <1E-18 | LGALS9 MX2<br>TNFSF4 HLA-A<br>SAMHD1<br>ISG15 IFITM1 OASL<br>CXCL11 MX1 IFI35<br>CXCL10 OAS3<br>SOCS1 STAT1 IFI6<br>OAS2 IFIT3 B2M<br>RSAD2 HLA-G<br>PSMB9 FCGR1A<br>IFI27 IFI30 CXCL9<br>OAS1 ISG20 IRF9<br>NMI IFIT1 TRIM22<br>IFIT2 SP100 PML<br>BIRC3 HLA-C GBP1<br>TRIM31 XAF1 XCL2<br>CCL4 HLA-F IL6 HLA-E<br>MX2 TNFSF4 HLA-A<br>CCL20 CCL3L3<br>SAMHD1 GBP2<br>ISG15 IFITM1 OASL<br>MX1 DDX60 CXCL10<br>OAS3 STAT1 IFI44L<br>PLSCR1 TAP2<br>HERC5 OAS2 IFIT3<br>RSAD2 PSMB9 IFI44<br>LAMP3 CXCL9<br>SP110 DDX58 OAS1<br>ISG20 IRF9 TAP1<br>IFIT1 TRIM22<br>DYNLT1 IFI16 IFIT2<br>SP100 PML IFIH1<br>HLA-C KPNA2 GBP1<br>UNC93B1 TLR3<br>EIF2AK2 CCL4 IL6<br>LGALS9 MX2<br>TNFSF4 HLA-A<br>SAMHD1<br>ISG15 IFITM1 OASL<br>MX1 DDX60 CXCL10<br>OAS3 STAT1 IFI44L<br>PLSCR1 HERC5<br>OAS2 IFIT3 B2M<br>RSAD2 FCGR1A<br>CXCL9 DDX58 OAS1<br>ISG20 RNF19B IRF9<br>IFIT1 TRIM22<br>DYNLT1 IFI16 IFIT2<br>PML IFIH1 GBP1<br>UNC93B1 TYROBP<br>PRTN3 TLR3 CD58 |
| viral process                       | GO | 46 | 811 | <1E-18 | <1E-18 |                                                                                                                                                                                                                                                                                                                                                                                                                                                                                                                                                                                                                                                                                                                                                                                                                                                                                                                                                                |
| immune effector process             | GO | 43 | 927 | <1E-18 | <1E-18 |                                                                                                                                                                                                                                                                                                                                                                                                                                                                                                                                                                                                                                                                                                                                                                                                                                                                                                                                                                |

|                                    |          |    |     |        |        |                                                                                                                                                                                                                                                                                                                                                             |
|------------------------------------|----------|----|-----|--------|--------|-------------------------------------------------------------------------------------------------------------------------------------------------------------------------------------------------------------------------------------------------------------------------------------------------------------------------------------------------------------|
|                                    |          |    |     |        |        | EIF2AK2 IL6 MX2<br>CLEC4E TNFSF4<br>DSN1 KLRD1<br>SAMHD1<br>ISG15 IFITM1 OASL<br>MX1 IFI35 OAS3<br>SOCS1 STAT1 IFI6<br>HERC5 OAS2<br>UBE2L6 IFIT3 B2M<br>RSAD2 HLA-G<br>FCGR1A IFI27 IFI30<br>DDX58 OAS1 ISG20<br>IRF9 IFIT1 TRIM22<br>IFIT2 SP100 PML<br>HLA-C KPNA2 GBP1<br>GBP4 TRIM31 XAF1<br>TRIM48 EIF2AK2<br>HLA-F HLA-E MX2<br>HLA-A SAMHD1<br>GBP2 |
| Interferon Signaling               | REACTOME | 42 | 197 | <1E-18 | <1E-18 | ISG15 IFITM1 OASL<br>MX1 DDX60 CXCL10<br>OAS3 STAT1 IFI44L<br>PLSCR1 HERC5<br>OAS2 IFIT3 B2M<br>RSAD2 CXCL9<br>DDX58 OAS1 ISG20<br>IRF9 IFIT1 TRIM22<br>IFI16 IFIT2 PML IFIH1<br>GBP1 UNC93B1<br>TLR3 EIF2AK2 IL6<br>HLA-E MX2 CLEC4E<br>TNFSF4 HLA-A<br>CCL20 SAMHD1                                                                                       |
| defense response to other organism | GO       | 38 | 497 | <1E-18 | <1E-18 | ISG15 IFITM1 OASL<br>MX1 DDX60 CXCL10<br>OAS3 STAT1 IFI44L<br>PLSCR1 HERC5<br>OAS2 IFIT3 RSAD2<br>PSMB9 IFI44 CXCL9<br>DDX58 OAS1 ISG20<br>IRF9 IFIT1 TRIM22<br>IFI16 IFIT2 PML IFIH1<br>GBP1 UNC93B1<br>TLR3 EIF2AK2 CCL4<br>IL6 LGALS9 MX2                                                                                                                |
| response to virus                  | GO       | 37 | 250 | <1E-18 | <1E-18 | TNFSF4 SAMHD1<br>ISG15 IFITM1 OASL<br>MX1 DDX60 CXCL10<br>OAS3 STAT1 IFI44L<br>PLSCR1 HERC5                                                                                                                                                                                                                                                                 |
| defense response to virus          | GO       | 32 | 164 | <1E-18 | <1E-18 |                                                                                                                                                                                                                                                                                                                                                             |

|                                       |          |    |     |        |        |                                                                                                                                                                                                                                                                                                                                                                                                                                                                                                                                                                                                                                                                                                                                                                                                                                                                                                                                                                                    |
|---------------------------------------|----------|----|-----|--------|--------|------------------------------------------------------------------------------------------------------------------------------------------------------------------------------------------------------------------------------------------------------------------------------------------------------------------------------------------------------------------------------------------------------------------------------------------------------------------------------------------------------------------------------------------------------------------------------------------------------------------------------------------------------------------------------------------------------------------------------------------------------------------------------------------------------------------------------------------------------------------------------------------------------------------------------------------------------------------------------------|
| response to interferon-gamma          | GO       | 30 | 145 | <1E-18 | <1E-18 | OAS2 IFIT3 RSAD2<br>CXCL9 DDX58 OAS1<br>ISG20 IRF9 IFIT1<br>TRIM22 IFI16 IFIT2<br>PML IFIH1 GBP1<br>UNC93B1 TLR3<br>EIF2AK2 IL6 MX2<br>SAMHD1<br>IFITM1 OASL OAS3<br>STAT1 OAS2 B2M<br>HLA-G FCGR1A IFI30<br>OAS1 IRF9 NMI<br>TRIM22 SP100 PML<br>HLA-C GBP1 TRIM31<br>TLR3 XCL2 CD58<br>CCL4 HLA-F LGALS9<br>HLA-E UBD HLA-A<br>CCL20 CCL3L3 GBP2<br>OASL OAS3 STAT1<br>OAS2 B2M HLA-G<br>FCGR1A IFI30 OAS1<br>IRF9 NMI TRIM22<br>SP100 PML HLA-C<br>GBP1 TRIM31 TLR3<br>XCL2 CD58 CCL4<br>HLA-F LGALS9 HLA-E<br>HLA-A CCL20<br>CCL3L3 GBP2<br>ISG15 IFITM1 OASL<br>MX1 IFI35 OAS3<br>STAT1 IFI6 OAS2<br>IFIT3 RSAD2 HLA-G<br>IFI27 OAS1 ISG20<br>IRF9 IFIT1 IFIT2<br>SP100 HLA-C XAF1<br>HLA-F HLA-E MX2<br>HLA-A SAMHD1<br>GBP2<br>ISG15 IFITM1 OASL<br>MX1 IFI35 OAS3<br>SOCS1 STAT1 IFI6<br>OAS2 IFIT3 RSAD2<br>HLA-G IFI27 OAS1<br>ISG20 IRF9 IFIT1<br>IFIT2 HLA-C XAF1<br>HLA-F HLA-E MX2<br>HLA-A SAMHD1<br>GBP2<br>ISG15 IFITM1 OASL<br>MX1 IFI35 OAS3<br>STAT1 IFI6 OAS2 |
| cellular response to interferon-gamma | GO       | 28 | 123 | <1E-18 | <1E-18 |                                                                                                                                                                                                                                                                                                                                                                                                                                                                                                                                                                                                                                                                                                                                                                                                                                                                                                                                                                                    |
| response to type I interferon         | GO       | 27 | 69  | <1E-18 | <1E-18 |                                                                                                                                                                                                                                                                                                                                                                                                                                                                                                                                                                                                                                                                                                                                                                                                                                                                                                                                                                                    |
| Interferon alpha/beta signaling       | REACTOME | 27 | 68  | <1E-18 | <1E-18 |                                                                                                                                                                                                                                                                                                                                                                                                                                                                                                                                                                                                                                                                                                                                                                                                                                                                                                                                                                                    |
| type I interferon                     | GO       | 27 | 65  | <1E-18 | <1E-18 |                                                                                                                                                                                                                                                                                                                                                                                                                                                                                                                                                                                                                                                                                                                                                                                                                                                                                                                                                                                    |

|                                             |          |    |      |        |        |                                                                                                                                                                                                                                                                                                                                                                                                                                                                                                                                                                                                                                                                                                                                                                                                                                                                                                                                                                                     |
|---------------------------------------------|----------|----|------|--------|--------|-------------------------------------------------------------------------------------------------------------------------------------------------------------------------------------------------------------------------------------------------------------------------------------------------------------------------------------------------------------------------------------------------------------------------------------------------------------------------------------------------------------------------------------------------------------------------------------------------------------------------------------------------------------------------------------------------------------------------------------------------------------------------------------------------------------------------------------------------------------------------------------------------------------------------------------------------------------------------------------|
| signaling pathway                           |          |    |      |        |        | IFIT3 RSAD2 HLA-G<br>IFI27 OAS1 ISG20<br>IRF9 IFIT1 IFIT2<br>SP100 HLA-C XAF1<br>HLA-F HLA-E MX2<br>HLA-A SAMHD1<br>GBP2<br>ISG15 IFITM1 OASL<br>MX1 IFI35 OAS3<br>STAT1 IFI6 OAS2<br>IFIT3 RSAD2 HLA-G<br>IFI27 OAS1 ISG20<br>IRF9 IFIT1 IFIT2<br>SP100 HLA-C XAF1<br>HLA-F HLA-E MX2<br>HLA-A SAMHD1<br>GBP2<br>OASL OAS3 SOCS1<br>STAT1 OAS2 B2M<br>HLA-G FCGR1A IFI30<br>OAS1 IRF9 TRIM22<br>SP100 PML HLA-C<br>GBP1 GBP4 TRIM31<br>TRIM48 HLA-F HLA-E<br>HLA-A GBP2<br>OASL OAS3 STAT1<br>OAS2 B2M HLA-G<br>FCGR1A IFI30 OAS1<br>IRF9 NMI TRIM22<br>SP100 PML HLA-C<br>GBP1 TRIM31 HLA-F<br>HLA-E HLA-A GBP2<br>ISG15 IFITM1 OASL<br>MX1 DDX60 OAS3<br>STAT1 PLSCR1<br>TAP2 HERC5 B2M<br>RSAD2 LAMP3<br>DDX58 OAS1 ISG20<br>TAP1 IFIT1 DYNLT1<br>IFI16 SP100 PML<br>ZFP36 BIRC3<br>TRIM31 EIF2AK2<br>CCL4 LGALS9 HLA-A<br>ISG15 IFITM1 OASL<br>CMPK2 CXCL11 MX1<br>IFI35 CXCL10 OAS3<br>SOCS1 STAT1 IFI6<br>OAS2 IFIT3 B2M<br>RSAD2 HLA-G<br>PSMB9 FCGR1A<br>IFI27 IFI30 CXCL9 |
| cellular response to type I interferon      | GO       | 27 | 65   | <1E-18 | <1E-18 |                                                                                                                                                                                                                                                                                                                                                                                                                                                                                                                                                                                                                                                                                                                                                                                                                                                                                                                                                                                     |
| Interferon gamma signaling                  | REACTOME | 23 | 92   | <1E-18 | <1E-18 |                                                                                                                                                                                                                                                                                                                                                                                                                                                                                                                                                                                                                                                                                                                                                                                                                                                                                                                                                                                     |
| interferon-gamma-mediated signaling pathway | GO       | 21 | 70   | <1E-18 | <1E-18 |                                                                                                                                                                                                                                                                                                                                                                                                                                                                                                                                                                                                                                                                                                                                                                                                                                                                                                                                                                                     |
| regulation of viral process                 | GO       | 29 | 387  | <1E-18 | 2E-18  |                                                                                                                                                                                                                                                                                                                                                                                                                                                                                                                                                                                                                                                                                                                                                                                                                                                                                                                                                                                     |
| cellular response to organic substance      | GO       | 60 | 2004 | <1E-18 | 6E-18  |                                                                                                                                                                                                                                                                                                                                                                                                                                                                                                                                                                                                                                                                                                                                                                                                                                                                                                                                                                                     |

|                                                                    |    |    |      |        |         |                                                                                                                                                                                                                                                                                                                                                                                                                                                                                                                                                                                                                                                                                                                                                                                                                                                                                                                                                                            |
|--------------------------------------------------------------------|----|----|------|--------|---------|----------------------------------------------------------------------------------------------------------------------------------------------------------------------------------------------------------------------------------------------------------------------------------------------------------------------------------------------------------------------------------------------------------------------------------------------------------------------------------------------------------------------------------------------------------------------------------------------------------------------------------------------------------------------------------------------------------------------------------------------------------------------------------------------------------------------------------------------------------------------------------------------------------------------------------------------------------------------------|
| regulation of symbiosis, encompassing mutualism through parasitism | GO | 29 | 415  | <1E-18 | 1.3E-17 | OAS1 ISG20 IRF9<br>NMI IFIT1 TRIM22<br>IFIT2 SP100 PML<br>ZFP36 BIRC3 HLA-C<br>GBP1 ATP6V1F<br>TRIM31 EGR2<br>CCNE1 TLR3 XAF1<br>XCL2 CD58 TREM2<br>EIF2AK2 CCL4 HLA-F<br>IL6 LGALS9 HLA-E<br>MX2 CASP1 TNFSF4<br>HLA-A JUNB CCL20<br>CCL3L3 SAMHD1<br>CSH1 GBP2<br>ISG15 IFITM1 OASL<br>MX1 DDX60 OAS3<br>STAT1 PLSCR1<br>TAP2 HERC5 B2M<br>RSAD2 LAMP3<br>DDX58 OAS1 ISG20<br>TAP1 IFIT1 DYNLT1<br>IFI16 SP100 PML<br>ZFP36 BIRC3<br>TRIM31 EIF2AK2<br>CCL4 LGALS9 HLA-A<br>ISG15 IFITM1 OASL<br>CMPK2 CXCL11 MX1<br>IFI35 CXCL10 OAS3<br>SOCS1 STAT1 IFI6<br>PLSCR1 MDK OAS2<br>IFIT3 B2M RSAD2<br>HLA-G PSMB9<br>FCGR1A LAMP3<br>IFI27 IFI30 CXCL9<br>DDX58 OAS1 ISG20<br>IRF9 NMI IFIT1<br>TRIM22 IFIT2 SP100<br>PML ZFP36 BIRC3<br>HLA-C GBP1<br>ATP6V1F TRIM31<br>EGR2 CCNE1 IDO1<br>TLR3 XAF1 XCL2<br>CD58 CD83 TREM2<br>EIF2AK2 CCL4 HLA-F<br>IL6 LGALS9 HLA-E<br>CHRNA3 MX2 CASP1<br>UBD TNFSF4 HLA-A<br>GNA15 JUNB CCL20<br>CCL3L3 RGS10<br>SAMHD1 CSH1<br>GBP2 |
| response to organic substance                                      | GO | 70 | 2728 | <1E-18 | 2.3E-17 |                                                                                                                                                                                                                                                                                                                                                                                                                                                                                                                                                                                                                                                                                                                                                                                                                                                                                                                                                                            |

|                                     |    |    |      |        |         |                                                                                                                                                                                                                                                                                                                                                                                                                                                                                                                                                        |
|-------------------------------------|----|----|------|--------|---------|--------------------------------------------------------------------------------------------------------------------------------------------------------------------------------------------------------------------------------------------------------------------------------------------------------------------------------------------------------------------------------------------------------------------------------------------------------------------------------------------------------------------------------------------------------|
|                                     |    |    |      |        |         | ISG15 IFITM1 OASL<br>CXCL11 MX1 DDX60<br>IFI35 CXCL10 OAS3<br>STAT1 IFI44L IFI6<br>PLSCR1 HERC5<br>MDK OAS2 UBE2L6<br>IFIT3 B2M RSAD2<br>HLA-G PSMB9<br>FCGR1A IFI27 IFI30<br>CXCL9 DDX58 HCP5<br>OAS1 ISG20 IRF9<br>TAP1 NMI IFIT1<br>TRIM22 IFI16 IFIT2<br>SP100 PML BCL2A1<br>LILRA2 IFIH1 ZFP36<br>MSRA HLA-C GBP1<br>TRIM31 UNC93B1<br>TYROBP PRTN3<br>IDO1 TLR3 XAF1<br>MELK XCL2 CD58<br>CD83 TREM2<br>EIF2AK2 CCL4 HLA-F<br>IL6 LGALS9 HLA-E<br>MX2 CASP1 AMBRA1<br>UBD CLEC4E<br>TNFSF4 HLA-A<br>GNA15 CCL20<br>CCL3L3 SHISA5<br>KLRD1 SAMHD1 |
| response to stress                  | GO | 79 | 3384 | <1E-18 | 3.7E-17 | ECT2 GBP2<br>ISG15 IFITM1<br>CXCL11 DDX60<br>CXCL10 SOCS1<br>STAT1 PLSCR1<br>TAP2 HERC5 B2M<br>RSAD2 HLA-G<br>PSMB9 FCGR1A<br>CXCL9 DDX58 TAP1<br>NMI IFIT1 KIR2DL3<br>IFI16 PML IFIH1<br>ZFP36 BIRC3 HLA-C<br>GBP1 UNC93B1<br>TYROBP LAIR2 IDO1<br>TLR3 XCL2 CD83<br>TREM2 EIF2AK2<br>CCL4 HLA-F IL6<br>LGALS9 HLA-E<br>KIR2DL2 CLEC4E<br>TNFSF4 HLA-A<br>CCL20 KLRD1 HCST<br>TESPA1 SAMHD1                                                                                                                                                           |
| regulation of immune system process | GO | 51 | 1546 | <1E-18 | 4.1E-17 |                                                                                                                                                                                                                                                                                                                                                                                                                                                                                                                                                        |



|                                         |           |    |      |        |           |                                                                                                                                                                                                                                                                                                                                                                                                                                                                                                                                                                  |
|-----------------------------------------|-----------|----|------|--------|-----------|------------------------------------------------------------------------------------------------------------------------------------------------------------------------------------------------------------------------------------------------------------------------------------------------------------------------------------------------------------------------------------------------------------------------------------------------------------------------------------------------------------------------------------------------------------------|
| negative regulation of viral life cycle | GO        | 17 | 89   | <1E-18 | 1.12E-16  | ISG15 IFITM1 OASL<br>MX1 OAS3 PLSCR1<br>RSAD2 OAS1 ISG20<br>IFIT1 IFI16 SP100<br>PML ZFP36 TRIM31<br>EIF2AK2 CCL4                                                                                                                                                                                                                                                                                                                                                                                                                                                |
| negative regulation of viral process    | GO        | 18 | 111  | <1E-18 | 1.37E-16  | ISG15 IFITM1 OASL<br>MX1 OAS3 STAT1<br>PLSCR1 RSAD2<br>OAS1 ISG20 IFIT1<br>IFI16 SP100 PML<br>ZFP36 TRIM31<br>EIF2AK2 CCL4<br>ISG15 IFITM1 OASL<br>CMPK2 CXCL11 MX1<br>IFI35 CXCL10 OAS3<br>SOCS1 STAT1 IFI6<br>OAS2 IFIT3 B2M<br>RSAD2 HLA-G<br>PSMB9 FCGR1A<br>IFI27 IFI30 CXCL9<br>OAS1 ISG20 IRF9<br>NMI IFIT1 TRIM22<br>IFIT2 SP100 PML<br>ZFP36 BIRC3 HLA-C<br>GBP1 ATP6V1F<br>TRIM31 EGR2<br>CCNE1 TLR3 XAF1<br>MELK XCL2 CD58<br>TREM2 EIF2AK2<br>CCL4 HLA-F IL6<br>LGALS9 HLA-E<br>CHRNA3 MX2 CASP1<br>TNFSF4 HLA-A<br>GNA15 JUNB CCL20<br>CCL3L3 RGS10 |
| cellular response to chemical stimulus  | GO        | 65 | 2550 | 1E-18  | 3.56E-16  | SAMHD1 ECT2 CSH1<br>GBP2                                                                                                                                                                                                                                                                                                                                                                                                                                                                                                                                         |
| Type II interferon signaling (IFNG)     | WikiPathw | 13 | 36   | 3E-18  | 1.238E-15 | ISG15 CXCL10<br>SOCS1 STAT1 IFI6<br>PSMB9 CXCL9 OAS1<br>IRF9 TAP1 IFIT2<br>GBP1 EIF2AK2<br>OAS3 STAT1 TAP2<br>OAS2 HLA-G DDX58<br>OAS1 IRF9 TAP1<br>IFIT1 SP100 PML<br>IFIH1 HLA-C TLR3                                                                                                                                                                                                                                                                                                                                                                          |
| Herpes simplex infection                | KEGG      | 20 | 182  | 3E-18  | 1.472E-15 | EIF2AK2 HLA-F IL6<br>HLA-E HLA-A                                                                                                                                                                                                                                                                                                                                                                                                                                                                                                                                 |

|                                      |    |    |      |         |           |                                                                                                                                                                                                                                                                                                                                                                                                                                                                                                          |
|--------------------------------------|----|----|------|---------|-----------|----------------------------------------------------------------------------------------------------------------------------------------------------------------------------------------------------------------------------------------------------------------------------------------------------------------------------------------------------------------------------------------------------------------------------------------------------------------------------------------------------------|
| regulation of immune response        | GO | 38 | 943  | 3E-18   | 1.474E-15 | IFITM1 DDX60<br>SOCS1 STAT1<br>PLSCR1 TAP2 B2M<br>RSAD2 HLA-G<br>PSMB9 FCGR1A<br>DDX58 TAP1 NMI<br>KIR2DL3 IFI16 IFIH1<br>BIRC3 HLA-C GBP1<br>UNC93B1 TYROBP<br>LAIR2 IDO1 TLR3<br>TREM2 HLA-F IL6<br>LGALS9 HLA-E<br>KIR2DL2 CLEC4E<br>TNFSF4 HLA-A<br>KLRD1 HCST<br>TESPA1 SAMHD1<br>ISG15 DDX60 SOCS1<br>HERC5 UBE2L6 B2M<br>RSAD2 HLA-G<br>DDX58 NMI IFI16<br>PML IFIH1 ZFP36<br>BIRC3 GBP1 SRGN<br>IDO1 TLR3 CD58<br>CD83 EIF2AK2 CCL4<br>IL6 LGALS9 HLA-E<br>CASP1 CLEC4E<br>TNFSF4 HLA-A<br>CCL20 |
| regulation of cytokine production    | GO | 31 | 603  | 5E-18   | 1.974E-15 | ISG15 IFITM1 OASL<br>MX1 DDX60 OAS3<br>STAT1 PLSCR1<br>TAP2 HERC5 B2M<br>RSAD2 LAMP3<br>DDX58 OAS1 ISG20<br>TAP1 IFIT1 DYNLT1<br>IFI16 SP100 PML<br>ZFP36 BIRC3<br>TRIM31 EIF2AK2<br>CCL4 LGALS9 HLA-A<br>ISG15 IFITM1 OASL<br>CMPK2 CXCL11 MX1<br>DDX60 IFI35 CXCL10<br>OAS3 SOCS1 STAT1<br>IFI44L PLSCR1 TAP2<br>HERC5 OAS2 IFIT3<br>B2M RSAD2 PSMB9<br>IFI44 FCGR1A<br>LAMP3 CXCL9<br>SP110 DDX58 OAS1<br>ISG20 IRF9 TDRD7<br>TAP1 IFIT1 TRIM22                                                       |
| regulation of multi-organism process | GO | 29 | 522  | 7E-18   | 2.888E-15 |                                                                                                                                                                                                                                                                                                                                                                                                                                                                                                          |
| multi-organism process               | GO | 66 | 2778 | 1.1E-17 | 4.418E-15 |                                                                                                                                                                                                                                                                                                                                                                                                                                                                                                          |

|                                                            |    |    |      |          |            |                                                                                                                                                                                                                                                                                                                                                                                                                                                                                                                                                                                                                                                                                                                                                                                                                                                                                                                     |
|------------------------------------------------------------|----|----|------|----------|------------|---------------------------------------------------------------------------------------------------------------------------------------------------------------------------------------------------------------------------------------------------------------------------------------------------------------------------------------------------------------------------------------------------------------------------------------------------------------------------------------------------------------------------------------------------------------------------------------------------------------------------------------------------------------------------------------------------------------------------------------------------------------------------------------------------------------------------------------------------------------------------------------------------------------------|
|                                                            |    |    |      |          |            | DYNLT1 IFI16 IFIT2<br>SP100 PML IFIH1<br>ZFP36 RPL39L<br>BIRC3 HLA-C KPNA2<br>GBP1 ATP6V1F<br>UNC93B1 PRTN3<br>IDO1 TLR3 TREM2<br>EIF2AK2 CCL4 IL6<br>LGALS9 HLA-E MX2<br>CASP1 CLEC4E<br>TNFSF4 HLA-A JUNB<br>CCL20 SAMHD1<br>GBP2<br>ISG15 IFITM1 OASL<br>CXCL11 MX1 IFI35<br>CXCL10 OAS3<br>SOCS1 STAT1 IFI6<br>MDK OAS2 IFIT3<br>B2M RSAD2 HLA-G<br>PSMB9 FCGR1A<br>IFI27 IFI30 CXCL9<br>OAS1 ISG20 IRF9<br>NMI IFIT1 TRIM22<br>IFIT2 SP100 PML<br>BCL2A1 BIRC3 HLA-<br>C GBP1 ATP6V1F<br>TRIM31 TYROBP<br>CCNE1 TLR3 XAF1<br>XCL2 CCL4 HLA-F<br>IL6 HLA-E CHRNA3<br>MX2 CLEC4E<br>TNFSF4 HLA-A<br>CCL20 CCL3L3<br>KLRD1 SAMHD1<br>CSH1 GBP2<br>ISG15 IFITM1 OASL<br>MX1 OAS3 PLSCR1<br>RSAD2 LAMP3 OAS1<br>ISG20 IFIT1 IFI16<br>SP100 PML ZFP36<br>TRIM31 EIF2AK2<br>CCL4 LGALS9<br>ISG15 IFITM1 OASL<br>MX1 OAS3 STAT1<br>PLSCR1 RSAD2<br>OAS1 ISG20 IFIT1<br>IFI16 SP100 PML<br>ZFP36 TRIM31<br>EIF2AK2 CCL4 |
| cell surface<br>receptor<br>signaling<br>pathway           | GO | 57 | 2171 | 1.5E-17  | 6.181E-15  |                                                                                                                                                                                                                                                                                                                                                                                                                                                                                                                                                                                                                                                                                                                                                                                                                                                                                                                     |
| regulation of<br>viral life<br>cycle                       | GO | 19 | 197  | 1.94E-16 | 7.589E-14  |                                                                                                                                                                                                                                                                                                                                                                                                                                                                                                                                                                                                                                                                                                                                                                                                                                                                                                                     |
| negative<br>regulation of<br>multi-<br>organism<br>process | GO | 18 | 169  | 2.3E-16  | 8.8355E-14 |                                                                                                                                                                                                                                                                                                                                                                                                                                                                                                                                                                                                                                                                                                                                                                                                                                                                                                                     |

|                                                                                                 |              |    |      |               |                 |                                                                                                                                                                                                                                                                                                                                                                                                                                                                                                         |
|-------------------------------------------------------------------------------------------------|--------------|----|------|---------------|-----------------|---------------------------------------------------------------------------------------------------------------------------------------------------------------------------------------------------------------------------------------------------------------------------------------------------------------------------------------------------------------------------------------------------------------------------------------------------------------------------------------------------------|
|                                                                                                 |              |    |      |               |                 | ISG15 IFITM1 OASL<br>CMPK2 CXCL11 MX1<br>DDX60 CXCL10<br>OAS3 SOCS1 STAT1<br>IFI44L PLSCR1<br>HERC5 OAS2 IFIT3<br>B2M RSAD2 PSMB9<br>IFI44 CXCL9 DDX58<br>OAS1 ISG20 IRF9<br>IFIT1 TRIM22 IFI16<br>IFIT2 TYMP PML<br>IFIH1 ZFP36 GBP1<br>UNC93B1 RAB32<br>TYROBP EGR2<br>CCNE1 PRTN3 IDO1<br>TLR3 XCL2 TREM2<br>EIF2AK2 CCL4 IL6<br>LGALS9 HLA-E MX2<br>CASP1 AMBRA1<br>CLEC4E TNFSF4<br>HLA-A JUNB CCL20<br>CCL3L3 SAMHD1                                                                              |
| response to<br>external<br>stimulus                                                             | GO           | 59 | 2491 | 3.58E-<br>16  | 1.34654<br>E-13 |                                                                                                                                                                                                                                                                                                                                                                                                                                                                                                         |
| Immunoreg<br>ulatory<br>interactions<br>between a<br>Lymphoid<br>and a non-<br>Lymphoid<br>cell | REACTO<br>ME | 16 | 124  | 6.17E-<br>16  | 2.27354<br>E-13 | IFITM1 B2M HLA-G<br>FCGR1A KIR2DL3<br>LILRA2 HLA-C<br>TYROBP LAIR2<br>TREM2 HLA-F HLA-E<br>KIR2DL2 HLA-A<br>KLRD1 HCST<br>ISG15 CXCL11<br>DDX60 CXCL10<br>SOCS1 STAT1<br>PLSCR1 TAP2 B2M<br>RSAD2 HLA-G<br>PSMB9 FCGR1A<br>CXCL9 DDX58 TAP1<br>IFI16 IFIH1 BIRC3<br>HLA-C UNC93B1<br>IDO1 TLR3 XCL2<br>CD83 TREM2 CCL4<br>HLA-F IL6 LGALS9<br>HLA-E CLEC4E<br>TNFSF4 HLA-A<br>CCL20 TESPA1<br>DDX60 SOCS1<br>STAT1 PLSCR1<br>HERC5 B2M RSAD2<br>PSMB9 FCGR1A<br>DDX58 TAP1 NMI<br>IFIT1 IFI16 PML IFIH1 |
| positive<br>regulation of<br>immune<br>system<br>process                                        | GO           | 36 | 1005 | 6.64E-<br>16  | 2.39724<br>E-13 |                                                                                                                                                                                                                                                                                                                                                                                                                                                                                                         |
| regulation of<br>defense<br>response                                                            | GO           | 33 | 864  | 1.561E-<br>15 | 5.5289E<br>-13  |                                                                                                                                                                                                                                                                                                                                                                                                                                                                                                         |

|                                                                                        |      |    |      |                |                 |                                                                                                                                                                                                                                                                                                                                                                                                                                                                                                                                                                                                                                                                                                          |
|----------------------------------------------------------------------------------------|------|----|------|----------------|-----------------|----------------------------------------------------------------------------------------------------------------------------------------------------------------------------------------------------------------------------------------------------------------------------------------------------------------------------------------------------------------------------------------------------------------------------------------------------------------------------------------------------------------------------------------------------------------------------------------------------------------------------------------------------------------------------------------------------------|
|                                                                                        |      |    |      |                |                 | ZFP36 BIRC3<br>UNC93B1 IDO1 TLR3<br>XCL2 EIF2AK2 CCL4<br>IL6 LGALS9 HLA-E<br>CASP1 CLEC4E<br>TNFSF4 HLA-A<br>CCL3L3 SAMHD1<br>ISG15 IFITM1 OASL<br>CMPK2 CXCL11 MX1<br>IFI35 CXCL10 OAS3<br>SOCS1 STAT1 RTP4<br>IFI6 PLSCR1 HERC5<br>MDK OAS2 UBE2L6<br>IFIT3 B2M RSAD2<br>HLA-G PSMB9<br>FCGR1A LAMP3<br>IFI27 IFI30 CXCL9<br>DDX58 OAS1 ISG20<br>IRF9 NMI IFIT1<br>TRIM22 OR4C15<br>IFIT2 TYMP SP100<br>PML ZFP36 BIRC3<br>HLA-C KPNA2 GBP1<br>ATP6V1F TRIM31<br>EGR2 CCNE1 IDO1<br>TLR3 XAF1 MELK<br>XCL2 CD58 CD83<br>TREM2 EIF2AK2<br>CCL4 HLA-F IL6<br>LGALS9 HLA-E<br>CHRNA3 MX2 CASP1<br>OR2B6 UBD TNFSF4<br>HLA-A GNA15 JUNB<br>CCL20 CCL3L3<br>RGS10 SAMHD1<br>OR4C45 ECT2<br>OR52E8 CSH1 GBP2 |
| response to<br>chemical<br>negative<br>regulation of<br>viral<br>genome<br>replication | GO   | 81 | 4360 | 3.395E-<br>15  | 1.17995<br>E-12 | ISG15 IFITM1 OASL<br>MX1 OAS3 PLSCR1<br>RSAD2 OAS1 ISG20<br>IFIT1 IFI16 EIF2AK2<br>MX1 CXCL10 OAS3<br>STAT1 OAS2 RSAD2<br>DDX58 OAS1 IRF9<br>PML IFIH1 KPNA2<br>TLR3 EIF2AK2 IL6<br>CASP1<br>ISG15 IFITM1 OASL<br>CXCL11 MX1 IFI35<br>CXCL10 OAS3                                                                                                                                                                                                                                                                                                                                                                                                                                                        |
| Influenza A                                                                            | KEGG | 16 | 169  | 5.1051<br>E-14 | 1.67903<br>E-11 |                                                                                                                                                                                                                                                                                                                                                                                                                                                                                                                                                                                                                                                                                                          |
| signal<br>transduction                                                                 | GO   | 82 | 4737 | 7.7947<br>E-14 | 2.51866<br>E-11 |                                                                                                                                                                                                                                                                                                                                                                                                                                                                                                                                                                                                                                                                                                          |

|                                                                                                     |                |              |               |                                       |                                        |                                                                                                                                                                                                                                                                                                                                                                                                                                                                                                                                                                                                                                                                                                                                                                                                                                                                                                                                                 |
|-----------------------------------------------------------------------------------------------------|----------------|--------------|---------------|---------------------------------------|----------------------------------------|-------------------------------------------------------------------------------------------------------------------------------------------------------------------------------------------------------------------------------------------------------------------------------------------------------------------------------------------------------------------------------------------------------------------------------------------------------------------------------------------------------------------------------------------------------------------------------------------------------------------------------------------------------------------------------------------------------------------------------------------------------------------------------------------------------------------------------------------------------------------------------------------------------------------------------------------------|
|                                                                                                     |                |              |               |                                       |                                        | SOCS1 STAT1 IFI6<br>MDK OAS2 IFIT3<br>B2M RSAD2 HLA-G<br>PSMB9 FCGR1A<br>IFI27 IFI30 CXCL9<br>SP110 DDX58 OAS1<br>ISG20 IRF9 NMI IFIT1<br>TRIM22 OR4C15<br>IFI16 IFIT2 SP100<br>PML BCL2A1 LILRA2<br>IFIH1 ZFP36 BIRC3<br>HLA-C GBP1<br>ATP6V1F TRIM31<br>UNC93B1 RAB32<br>TYROBP SRGN<br>CCNE1 TLR3 XAF1<br>MELK XCL2 RGS1<br>CD83 EIF2AK2 CCL4<br>HLA-F IL6 LGALS9<br>HLA-E CHRNA3 MX2<br>CASP1 OR2B6<br>CLEC4E TNFSF4<br>HLA-A GNA15 CCL20<br>CCL3L3 SHISA5<br>KLRD1 RGS10<br>SAMHD1 OR4C45<br>ZNF831 ECT2<br>OR52E8 RASSF3<br>CSH1 GBP2<br>IFITM1 HERC6<br>SOCS1 TAP2 HERC5<br>UBE2L6 TRIM69 B2M<br>HLA-G PSMB9<br>FCGR1A IFI30<br>RNF19B TAP1<br>KIR2DL3 LILRA2<br>RNF213 NFKBIE<br>HLA-C TYROBP<br>LAIR2 ORAI2 TREM2<br>HLA-F HLA-E<br>KIR2DL2 HLA-A<br>KLRD1 HCST<br>TAP2 B2M HLA-G<br>IFI30 TAP1 KIR2DL3<br>HLA-C HLA-F HLA-E<br>KIR2DL2 HLA-A<br>KLRD1<br>DDX60 B2M RSAD2<br>HLA-G DDX58 IFI16<br>IFIH1 IDO1 TLR3<br>CD58 CD83 EIF2AK2 |
| Adaptive<br>Immune<br>System                                                                        | REACTO<br>ME   | 29           | 799           | 2.0219<br>1E-13                       | 6.20661<br>E-11                        |                                                                                                                                                                                                                                                                                                                                                                                                                                                                                                                                                                                                                                                                                                                                                                                                                                                                                                                                                 |
| Antigen<br>processing<br>and<br>presentation<br>positive<br>regulation of<br>cytokine<br>production | KEGG<br><br>GO | 12<br><br>21 | 74<br><br>389 | 1.9883<br>5E-13<br><br>2.5409<br>E-13 | 6.20661<br>E-11<br><br>7.67185<br>E-11 |                                                                                                                                                                                                                                                                                                                                                                                                                                                                                                                                                                                                                                                                                                                                                                                                                                                                                                                                                 |

|                                        |    |    |      |                 |                 |                                                                                                                                                                                                                                                                                                                                                                                                                                                                                                                                                                                                                                                                                                                                                 |
|----------------------------------------|----|----|------|-----------------|-----------------|-------------------------------------------------------------------------------------------------------------------------------------------------------------------------------------------------------------------------------------------------------------------------------------------------------------------------------------------------------------------------------------------------------------------------------------------------------------------------------------------------------------------------------------------------------------------------------------------------------------------------------------------------------------------------------------------------------------------------------------------------|
| regulation of viral genome replication | GO | 12 | 81   | 5.2052<br>1E-13 | 1.54628<br>E-10 | CCL4 IL6 LGALS9<br>HLA-E CASP1<br>CLEC4E TNFSF4<br>HLA-A CCL20<br>ISG15 IFITM1 OASL<br>MX1 OAS3 PLSCR1<br>RSAD2 OAS1 ISG20<br>IFIT1 IFI16 EIF2AK2<br>ISG15 IFITM1 OASL<br>CXCL11 MX1 IFI35<br>CXCL10 OAS3<br>SOCS1 STAT1 IFI6<br>MDK OAS2 IFIT3<br>B2M RSAD2 HLA-G<br>PSMB9 FCGR1A<br>IFI27 IFI30 CXCL9<br>SP110 DDX58 OAS1<br>ISG20 IRF9 NMI IFIT1<br>TRIM22 OR4C15<br>IFI16 IFIT2 SP100<br>PML BCL2A1 LILRA2<br>IFIH1 ZFP36 BIRC3<br>HLA-C GBP1<br>ATP6V1F TRIM31<br>UNC93B1 RAB32<br>TYROBP SRGN<br>CCNE1 TLR3 XAF1<br>MELK XCL2 RGS1<br>CD83 EIF2AK2 CCL4<br>VAMP5 HLA-F IL6<br>LGALS9 HLA-E<br>CHRNA3 MX2 CASP1<br>AMBRA1 OR2B6<br>CLEC4E TNFSF4<br>HLA-A GNA15 CCL20<br>CCL3L3 SHISA5<br>KLRD1 RGS10 SYT4<br>SAMHD1 OR4C45<br>ZNF831 ECT2 |
| cell communication                     | GO | 85 | 5274 | 1.1322<br>E-12  | 3.30997<br>E-10 | OR52E8 RASSF3<br>CSH1 GBP2<br>TAP2 B2M RSAD2<br>HLA-G TAP1 HLA-C                                                                                                                                                                                                                                                                                                                                                                                                                                                                                                                                                                                                                                                                                |
| regulation of T cell mediated immunity | GO | 11 | 67   | 1.7183<br>9E-12 | 4.94519<br>E-10 | HLA-F IL6 HLA-E<br>TNFSF4 HLA-A<br>ISG15 IFITM1 OASL<br>CXCL11 MX1 IFI35<br>CXCL10 OAS3<br>SOCS1 STAT1 IFI6                                                                                                                                                                                                                                                                                                                                                                                                                                                                                                                                                                                                                                     |
| signaling                              | GO | 90 | 5795 | 1.7821<br>4E-12 | 4.97324<br>E-10 | HERC5 MDK OAS2<br>UBE2L6 IFIT3 B2M                                                                                                                                                                                                                                                                                                                                                                                                                                                                                                                                                                                                                                                                                                              |

single  
organism  
signaling

GO

90

5795

1.7821  
4E-12

4.97324  
E-10

RSAD2 HLA-G  
PSMB9 FCGR1A  
IFI27 IFI30 CXCL9  
SP110 DDX58 OAS1  
ISG20 IRF9 NMI IFIT1  
TRIM22 OR4C15  
IFI16 IFIT2 SP100  
PML BCL2A1 LILRA2  
IFIH1 ZFP36 BIRC3  
HLA-C KPNA2 GBP1  
ATP6V1F TRIM31  
UNC93B1 RAB32  
TYROBP SRGN  
EGR2 CCNE1 TLR3  
XAF1 MELK XCL2  
RGS1 CD83 EIF2AK2  
CCL4 VAMP5 HLA-F  
IL6 LGALS9 HLA-E  
CHRNA3 MX2 CASP1  
OR2B6 CLEC4E  
TNFSF4 HLA-A  
GNA15 JUNB CCL20  
CCL3L3 DSN1  
SHISA5 KLRD1  
RGS10 SYT4  
SAMHD1 OR4C45  
ZNF831 ECT2  
OR52E8 RASSF3  
CSH1 GBP2  
ISG15 IFITM1 OASL  
CXCL11 MX1 IFI35  
CXCL10 OAS3  
SOCS1 STAT1 IFI6  
HERC5 MDK OAS2  
UBE2L6 IFIT3 B2M  
RSAD2 HLA-G  
PSMB9 FCGR1A  
IFI27 IFI30 CXCL9  
SP110 DDX58 OAS1  
ISG20 IRF9 NMI IFIT1  
TRIM22 OR4C15  
IFI16 IFIT2 SP100  
PML BCL2A1 LILRA2  
IFIH1 ZFP36 BIRC3  
HLA-C KPNA2 GBP1  
ATP6V1F TRIM31  
UNC93B1 RAB32  
TYROBP SRGN  
EGR2 CCNE1 TLR3  
XAF1 MELK XCL2  
RGS1 CD83 EIF2AK2



|                                                                                                                                                  |    |    |     |                 |                 |                                                                                                                                                                                                                                                                                                            |
|--------------------------------------------------------------------------------------------------------------------------------------------------|----|----|-----|-----------------|-----------------|------------------------------------------------------------------------------------------------------------------------------------------------------------------------------------------------------------------------------------------------------------------------------------------------------------|
|                                                                                                                                                  |    |    |     |                 |                 | CCL4 VAMP5 HLA-F<br>IL6 LGALS9 HLA-E<br>CHRNA3 MX2 CASP1<br>OR2B6 CLEC4E<br>TNFSF4 HLA-A<br>GNA15 JUNB CCL20<br>CCL3L3 DSN1<br>SHISA5 KLRD1<br>RGS10 SYT4<br>SAMHD1 OR4C45<br>ZNF831 ECT2<br>OR52E8 RASSF3<br>CSH1 GBP2<br>TAP2 B2M RSAD2<br>HLA-G FCGR1A<br>TAP1 HLA-C HLA-F<br>IL6 HLA-E TNFSF4<br>HLA-A |
| positive regulation of lymphocyte mediated immunity                                                                                              | GO | 12 | 95  | 2.8597<br>5E-12 | 7.74571<br>E-10 |                                                                                                                                                                                                                                                                                                            |
| positive regulation of adaptive immune response based on somatic recombination of immune receptors built from immunoglobulin superfamily domains | GO | 12 | 95  | 2.8597<br>5E-12 | 7.74571<br>E-10 | TAP2 B2M RSAD2<br>HLA-G FCGR1A<br>TAP1 HLA-C HLA-F<br>IL6 HLA-E TNFSF4<br>HLA-A                                                                                                                                                                                                                            |
| positive regulation of adaptive immune response                                                                                                  | GO | 12 | 99  | 4.4472<br>9E-12 | 1.18711<br>E-09 | TAP2 B2M RSAD2<br>HLA-G PSMB9<br>FCGR1A DDX58<br>TAP1 IFI16 IFIH1<br>BIRC3 HLA-C<br>UNC93B1 IDO1 TLR3<br>HLA-F IL6 LGALS9<br>HLA-E CLEC4E<br>TNFSF4 HLA-A<br>TESPA1                                                                                                                                        |
| positive regulation of immune response                                                                                                           | GO | 25 | 690 | 7.4734<br>8E-12 | 1.96638<br>E-09 |                                                                                                                                                                                                                                                                                                            |

|                                                                                              |          |    |     |                 |                 |                                                                                                                                                                                           |
|----------------------------------------------------------------------------------------------|----------|----|-----|-----------------|-----------------|-------------------------------------------------------------------------------------------------------------------------------------------------------------------------------------------|
| antigen processing and presentation of exogenous peptide antigen via MHC class I             | GO       | 11 | 78  | 7.5831<br>2E-12 | 1.96712<br>E-09 | TAP2 B2M HLA-G<br>PSMB9 FCGR1A<br>IFI30 TAP1 HLA-C<br>HLA-F HLA-E HLA-A<br>DDX60 TAP2 HERC5<br>B2M RSAD2 HLA-G<br>FCGR1A DDX58<br>TAP1 IFIT1 PML<br>BIRC3 HLA-C TLR3<br>EIF2AK2 HLA-F IL6 |
| regulation of immune effector process                                                        | GO       | 21 | 473 | 8.3314<br>5E-12 | 2.13123<br>E-09 | LGALS9 HLA-E<br>TNFSF4 HLA-A<br>TAP2 B2M RSAD2<br>HLA-G FCGR1A<br>TAP1 HLA-C HLA-F                                                                                                        |
| regulation of lymphocyte mediated immunity                                                   | GO       | 13 | 138 | 1.1098<br>6E-11 | 2.8002E<br>-09  | IL6 LGALS9 HLA-E<br>TNFSF4 HLA-A                                                                                                                                                          |
| modification of morphology or physiology of other organism involved in symbiotic interaction | GO       | 20 | 436 | 1.4231<br>9E-11 | 3.41803<br>E-09 | ISG15 STAT1 TAP2<br>RSAD2 PSMB9<br>SP110 DDX58 TAP1<br>IFIT1 TRIM22<br>DYNLT1 SP100 PML<br>IFIH1 HLA-C KPNA2<br>TLR3 EIF2AK2 CCL4<br>HLA-A                                                |
| negative regulation of reproductive process                                                  | GO       | 12 | 110 | 1.3749<br>5E-11 | 3.41803<br>E-09 | IFITM1 OASL MX1<br>OAS3 PLSCR1<br>RSAD2 OAS1 IFIT1<br>IFI16 SP100 EIF2AK2<br>CCL4<br>HLA-G KIR2DL3 HLA-<br>C HLA-F IL6 HLA-E                                                              |
| Graft-versus-host disease                                                                    | KEGG     | 9  | 40  | 1.4289<br>7E-11 | 3.41803<br>E-09 | KIR2DL2 HLA-A<br>KLRD1                                                                                                                                                                    |
| Antigen Presentation: Folding, assembly and peptide loading of class I MHC                   | REACTOME | 8  | 25  | 1.7380<br>3E-11 | 4.10398<br>E-09 | TAP2 B2M HLA-G<br>TAP1 HLA-C HLA-F<br>HLA-E HLA-A                                                                                                                                         |
| positive regulation of leukocyte                                                             | GO       | 12 | 114 | 2.0159<br>8E-11 | 4.70004<br>E-09 | TAP2 B2M RSAD2<br>HLA-G FCGR1A<br>TAP1 HLA-C HLA-F                                                                                                                                        |

|                                                            |    |     |      |                 |                 |                                                                                                                                                                                                                                                                                                                                                                                                                                                                                                                                                                                                                                                                               |
|------------------------------------------------------------|----|-----|------|-----------------|-----------------|-------------------------------------------------------------------------------------------------------------------------------------------------------------------------------------------------------------------------------------------------------------------------------------------------------------------------------------------------------------------------------------------------------------------------------------------------------------------------------------------------------------------------------------------------------------------------------------------------------------------------------------------------------------------------------|
| mediated immunity                                          |    |     |      |                 |                 | IL6 HLA-E TNFSF4<br>HLA-A<br>ISG15 STAT1 TAP2<br>RSAD2 PSMB9<br>SP110 DDX58 TAP1<br>IFIT1 TRIM22<br>DYNLT1 SP100 PML<br>IFIH1 HLA-C KPNA2<br>TLR3 EIF2AK2 CCL4<br>HLA-A<br>TAP2 B2M RSAD2<br>HLA-G FCGR1A<br>TAP1 HLA-C TLR3<br>HLA-F IL6 LGALS9<br>HLA-E TNFSF4 HLA-A                                                                                                                                                                                                                                                                                                                                                                                                        |
| modification of morphology or physiology of other organism | GO | 20  | 452  | 2.6122<br>2E-11 | 6.01398<br>E-09 |                                                                                                                                                                                                                                                                                                                                                                                                                                                                                                                                                                                                                                                                               |
| regulation of leukocyte mediated immunity                  | GO | 14  | 186  | 3.0547<br>7E-11 | 6.94602<br>E-09 | ISG15 IFITM1 OASL<br>CMPK2 CXCL11 MX1<br>DDX60 IFI35 CXCL10<br>OAS3 SOCS1 STAT1<br>IFI44L RTP4 IFI6<br>PLSCR1 TAP2<br>HERC5 MDK OAS2<br>UBE2L6 IFIT3 B2M<br>RSAD2 HLA-G<br>PSMB9 IFI44<br>FCGR1A LAMP3<br>IFI27 IFI30 CXCL9<br>SP110 DDX58 HCP5<br>OAS1 ISG20 RNF19B<br>IRF9 TAP1 NMI IFIT1<br>TRIM22 DYNLT1<br>KIR2DL3 OR4C15<br>IFI16 IFIT2 TYMP<br>SP100 PML BCL2A1<br>LILRA2 IFIH1 ZFP36<br>MSRA BIRC3 HLA-C<br>HMHB1 KPNA2 GBP1<br>ATP6V1F TRIM31<br>UNC93B1 RAB32<br>TYROBP SRGN<br>EGR2 CCNE1 PRTN3<br>IDO1 TLR3 XAF1<br>MELK XCL2 RGS1<br>CD58 CD83 TREM2<br>EIF2AK2 CCL4 HLA-F<br>IL6 LGALS9 HLA-E<br>CHRNA3 MX2 CASP1<br>AMBRA1 OR2B6<br>UBD CLEC4E<br>TNFSF4 HLA-A |
| response to stimulus                                       | GO | 110 | 8044 | 3.3365<br>2E-11 | 7.49414<br>E-09 |                                                                                                                                                                                                                                                                                                                                                                                                                                                                                                                                                                                                                                                                               |

|                                                                                                                                                        |    |    |      |                 |                 |                                                                                                                                                                                                                                                                                                                                                                                                                                                                                    |
|--------------------------------------------------------------------------------------------------------------------------------------------------------|----|----|------|-----------------|-----------------|------------------------------------------------------------------------------------------------------------------------------------------------------------------------------------------------------------------------------------------------------------------------------------------------------------------------------------------------------------------------------------------------------------------------------------------------------------------------------------|
|                                                                                                                                                        |    |    |      |                 |                 | GNA15 JUNB CCL20<br>CCL3L3 DSN1<br>SHISA5 KLRD1<br>RGS10 SAMHD1<br>OR4C45 ZNF831<br>ECT2 OR52E8<br>RASSF3 CSH1 GBP2<br>DDX60 PLSCR1<br>RSAD2 PSMB9<br>FCGR1A DDX58<br>IFI16 IFIH1 BIRC3<br>UNC93B1 IDO1 TLR3<br>XCL2 CCL4 IL6<br>LGALS9 HLA-E<br>CLEC4E TNFSF4<br>CCL3L3<br>ISG15 HERC5<br>UBE2L6 DDX58 NMI<br>PML IFIH1 ZFP36<br>GBP1 SRGN IDO1<br>CD83 IL6 LGALS9<br>TNFSF4<br>DDX60 TAP2 B2M<br>RSAD2 HLA-G<br>FCGR1A TAP1 HLA-<br>C HLA-F IL6 LGALS9<br>HLA-E TNFSF4 HLA-<br>A |
| positive<br>regulation of<br>defense<br>response                                                                                                       | GO | 20 | 461  | 3.6371<br>8E-11 | 8.07102<br>E-09 |                                                                                                                                                                                                                                                                                                                                                                                                                                                                                    |
| negative<br>regulation of<br>cytokine<br>production                                                                                                    | GO | 15 | 232  | 4.7193<br>2E-11 | 1.03477<br>E-08 |                                                                                                                                                                                                                                                                                                                                                                                                                                                                                    |
| positive<br>regulation of<br>immune<br>effector<br>process<br>antigen<br>processing<br>and<br>presentation<br>of peptide<br>antigen via<br>MHC class I | GO | 14 | 197  | 6.2172<br>2E-11 | 1.34716<br>E-08 |                                                                                                                                                                                                                                                                                                                                                                                                                                                                                    |
| response to<br>bacterium                                                                                                                               | GO | 21 | 538  | 7.9097<br>6E-11 | 1.67451<br>E-08 | TAP2 B2M HLA-G<br>PSMB9 FCGR1A<br>IFI30 TAP1 HLA-C<br>HLA-F HLA-E HLA-A<br>ISG15 CMPK2<br>CXCL11 CXCL10<br>SOCS1 B2M CXCL9<br>ZFP36 IDO1 TLR3<br>TREM2 EIF2AK2 IL6<br>LGALS9 HLA-E<br>CASP1 CLEC4E<br>TNFSF4 HLA-A JUNB<br>CCL20<br>ISG15 IFITM1 OASL<br>CMPK2 CXCL11 MX1<br>IFI35 CXCL10 OAS3<br>SOCS1 STAT1 IFI6<br>MDK OAS2 UBE2L6<br>IFIT3 B2M RSAD2<br>HLA-G PSMB9                                                                                                            |
| cellular<br>response to<br>stimulus                                                                                                                    | GO | 89 | 6172 | 9.1108<br>1E-11 | 1.90685<br>E-08 |                                                                                                                                                                                                                                                                                                                                                                                                                                                                                    |

|                                                                                                                                |              |    |     |                 |                 |                                                                                                                                                                                                                                                                                                                                                                                                                                                                                                                                                                                    |
|--------------------------------------------------------------------------------------------------------------------------------|--------------|----|-----|-----------------|-----------------|------------------------------------------------------------------------------------------------------------------------------------------------------------------------------------------------------------------------------------------------------------------------------------------------------------------------------------------------------------------------------------------------------------------------------------------------------------------------------------------------------------------------------------------------------------------------------------|
|                                                                                                                                |              |    |     |                 |                 | FCGR1A IFI27 IFI30<br>CXCL9 SP110 DDX58<br>OAS1 ISG20 IRF9<br>NMI IFIT1 TRIM22<br>OR4C15 IFI16 IFIT2<br>SP100 PML BCL2A1<br>LILRA2 IFIH1 ZFP36<br>BIRC3 HLA-C GBP1<br>ATP6V1F TRIM31<br>UNC93B1 RAB32<br>TYROBP SRGN<br>EGR2 CCNE1 TLR3<br>XAF1 MELK XCL2<br>RGS1 CD58 CD83<br>TREM2 EIF2AK2<br>CCL4 HLA-F IL6<br>LGALS9 HLA-E<br>CHRNA3 MX2 CASP1<br>AMBRA1 OR2B6<br>CLEC4E TNFSF4<br>HLA-A GNA15 JUNB<br>CCL20 CCL3L3<br>SHISA5 KLRD1<br>RGS10 SAMHD1<br>OR4C45 ZNF831<br>ECT2 OR52E8<br>RASSF3 CSH1 GBP2<br>ISG15 MX1 STAT1<br>HERC5 UBE2L6<br>DDX58 IFIT1 KPNA2<br>EIF2AK2 MX2 |
| ISG15<br>antiviral<br>mechanism                                                                                                | REACTO<br>ME | 10 | 74  | 9.6383<br>8E-11 | 1.97244<br>E-08 |                                                                                                                                                                                                                                                                                                                                                                                                                                                                                                                                                                                    |
| Antiviral<br>mechanism<br>by IFN-<br>stimulated<br>genes                                                                       | REACTO<br>ME | 10 | 74  | 9.6383<br>8E-11 | 1.97244<br>E-08 | ISG15 MX1 STAT1<br>HERC5 UBE2L6<br>DDX58 IFIT1 KPNA2<br>EIF2AK2 MX2                                                                                                                                                                                                                                                                                                                                                                                                                                                                                                                |
| antigen<br>processing<br>and<br>presentation<br>of<br>exogenous<br>peptide<br>antigen via<br>MHC class<br>I, TAP-<br>dependent | GO           | 10 | 75  | 1.0863<br>1E-10 | 2.19864<br>E-08 | TAP2 B2M HLA-G<br>PSMB9 FCGR1A<br>TAP1 HLA-C HLA-F<br>HLA-E HLA-A<br>TAP2 B2M HLA-G                                                                                                                                                                                                                                                                                                                                                                                                                                                                                                |
| phagocytic<br>vesicle                                                                                                          | GO           | 11 | 104 | 1.2765<br>3E-10 | 2.55556<br>E-08 | TAP1 HLA-C<br>UNC93B1 RAB32                                                                                                                                                                                                                                                                                                                                                                                                                                                                                                                                                        |

|                                                                                                                                                                                       |          |    |     |                 |                 |                                                                                                                                                                            |
|---------------------------------------------------------------------------------------------------------------------------------------------------------------------------------------|----------|----|-----|-----------------|-----------------|----------------------------------------------------------------------------------------------------------------------------------------------------------------------------|
| regulation of innate immune response                                                                                                                                                  | GO       | 19 | 445 | 1.3707<br>7E-10 | 2.71471<br>E-08 | HLA-F HLA-E<br>AMBRA1 HLA-A<br>DDX60 SOCS1<br>STAT1 PLSCR1<br>RSAD2 PSMB9<br>DDX58 TAP1 NMI<br>IFI16 IFIH1 BIRC3<br>UNC93B1 TLR3<br>LGALS9 HLA-E<br>CLEC4E HLA-A<br>SAMHD1 |
| regulation of adaptive immune response based on somatic recombination of immune receptors built from immunoglobulin superfamily domains                                               | GO       | 12 | 139 | 1.6825<br>3E-10 | 3.29669<br>E-08 | TAP2 B2M RSAD2<br>HLA-G FCGR1A<br>TAP1 HLA-C HLA-F<br>IL6 HLA-E TNFSF4<br>HLA-A                                                                                            |
| response to interferon-alpha antigen processing and presentation of exogenous peptide antigen via MHC class I, TAP-independent Class I MHC mediated antigen processing & presentation | GO       | 7  | 20  | 1.9043<br>6E-10 | 3.65709<br>E-08 | IFITM1 IFIT3 LAMP3<br>OAS1 IFIT2 EIF2AK2<br>MX2                                                                                                                            |
| regulation of adaptive immune response                                                                                                                                                | GO       | 6  | 9   | 1.9061<br>8E-10 | 3.65709<br>E-08 | B2M HLA-G HLA-C<br>HLA-F HLA-E HLA-A<br>HERC6 SOCS1 TAP2<br>HERC5 UBE2L6<br>TRIM69 B2M HLA-G<br>PSMB9 FCGR1A<br>RNF19B TAP1                                                |
|                                                                                                                                                                                       | REACTOME | 17 | 365 | 3.3276<br>8E-10 | 6.31847<br>E-08 | RNF213 HLA-C HLA-F<br>HLA-E HLA-A                                                                                                                                          |
| regulation of adaptive immune response                                                                                                                                                | GO       | 12 | 150 | 3.7919<br>5E-10 | 7.12654<br>E-08 | TAP2 B2M RSAD2<br>HLA-G FCGR1A<br>TAP1 HLA-C HLA-F                                                                                                                         |

|                                    |    |    |      |                 |                 |                                                                                                                                                                                                                                                                                                                                                                                                                                                                                                     |
|------------------------------------|----|----|------|-----------------|-----------------|-----------------------------------------------------------------------------------------------------------------------------------------------------------------------------------------------------------------------------------------------------------------------------------------------------------------------------------------------------------------------------------------------------------------------------------------------------------------------------------------------------|
| MHC class I protein complex        | GO | 6  | 11   | 4.6653<br>9E-10 | 8.6795E<br>-08  | IL6 HLA-E TNFSF4<br>HLA-A<br>B2M HLA-G HLA-C<br>HLA-F HLA-E HLA-A<br>OASL CXCL11<br>CXCL10 SOCS1<br>STAT1 RTP4<br>PLSCR1 TAP2 MDK<br>HLA-G CXCL9 TAP1<br>TYMP SP100 HLA-C<br>UNC93B1 TYROBP<br>CCNE1 XCL2 CD58<br>PRAMEF1 CCL4<br>HLA-F IL6 HLA-E<br>TNFSF4 HLA-A<br>GNA15 CCL20                                                                                                                                                                                                                    |
| receptor binding                   | GO | 34 | 1504 | 4.9840<br>4E-10 | 9.1796E<br>-08  | CCL3L3 KLRD1<br>HCST TESPA1 CSH1<br>IFITM1 CXCL11<br>DDX60 CXCL10<br>SOCS1 STAT1 IFI6<br>PLSCR1 TAP2<br>HERC5 B2M RSAD2<br>HLA-G PSMB9<br>FCGR1A CXCL9<br>DDX58 TAP1 NMI<br>IFIT1 TRIM22<br>DYNLT1 KIR2DL3<br>IFI16 SP100 PML<br>BCL2A1 IFIH1 ZFP36<br>RNF213 BIRC3 HLA-<br>C GBP1 UNC93B1<br>TYROBP LAIR2 IDO1<br>TLR3 XCL2 RGS1<br>TREM2 EIF2AK2<br>PRAMEF1 CCL4<br>HLA-F IL6 LGALS9<br>HLA-E CASP1<br>AMBRA1 KIR2DL2<br>UBD CLEC4E<br>TNFSF4 HLA-A<br>CCL20 CCL3L3<br>SHISA5 KLRD1<br>RGS10 HCST |
| regulation of response to stimulus | GO | 64 | 4092 | 6.2881<br>E-10  | 1.14148<br>E-07 | TESPA1 SAMHD1<br>ECT2<br>CMPK2 CXCL11                                                                                                                                                                                                                                                                                                                                                                                                                                                               |
| response to lipopolysaccharide     | GO | 16 | 331  | 6.3215<br>8E-10 | 1.14148<br>E-07 | CXCL10 SOCS1 B2M<br>CXCL9 ZFP36 IDO1<br>TREM2 EIF2AK2 IL6                                                                                                                                                                                                                                                                                                                                                                                                                                           |

|                                                                                                                                                                                                                                      |                                              |                                 |                                      |                                                                                     |                                                                                      |                                                                                                                                                                                                                                                                                                                                                                                                                                                                                                              |
|--------------------------------------------------------------------------------------------------------------------------------------------------------------------------------------------------------------------------------------|----------------------------------------------|---------------------------------|--------------------------------------|-------------------------------------------------------------------------------------|--------------------------------------------------------------------------------------|--------------------------------------------------------------------------------------------------------------------------------------------------------------------------------------------------------------------------------------------------------------------------------------------------------------------------------------------------------------------------------------------------------------------------------------------------------------------------------------------------------------|
|                                                                                                                                                                                                                                      |                                              |                                 |                                      |                                                                                     |                                                                                      | LGALS9 CASP1<br>TNFSF4 JUNB<br>CCL20                                                                                                                                                                                                                                                                                                                                                                                                                                                                         |
| Endosomal/<br>Vacuolar<br>pathway<br>double-<br>stranded<br>RNA<br>binding                                                                                                                                                           | REACTO<br>ME<br><br>GO                       | 6<br><br>9                      | 12<br><br>66                         | 6.9623<br>E-10<br><br>7.5787<br>7E-10                                               | 1.24497<br>E-07<br><br>1.34217<br>E-07                                               | B2M HLA-G HLA-C<br>HLA-F HLA-E HLA-A<br><br>OASL DDX60 OAS3<br>OAS2 DDX58 OAS1<br>IFIH1 TLR3 EIF2AK2<br>CMPK2 CXCL11<br>CXCL10 SOCS1 B2M<br>CXCL9 ZFP36 IDO1<br>TREM2 EIF2AK2 IL6<br>LGALS9 CASP1<br>TNFSF4 JUNB<br>CCL20<br>OAS3 STAT1 OAS2<br>OAS1 IRF9 IFI16<br>BIRC3 GBP1 GBP4<br>IL6 CASP1 GBP2<br>TAP2 B2M HLA-G<br>PSMB9 FCGR1A<br>TAP1 HLA-C HLA-F<br>HLA-E HLA-A<br>TAP2 B2M HLA-G<br>TAP1 HLA-C RAB32<br>HLA-F HLA-E HLA-A<br>MX1 OAS3 STAT1<br>OAS2 DDX58 OAS1<br>IRF9 IFIH1 CCNE1<br>EIF2AK2 IL6 |
| response to<br>molecule of<br>bacterial<br>origin<br>NOD-like<br>receptor<br>signaling<br>pathway<br>Antigen<br>processing-<br>Cross<br>presentation<br>phagocytic<br>vesicle<br>membrane                                            | GO<br><br>KEGG<br><br>REACTO<br>ME<br><br>GO | 16<br><br>12<br><br>10<br><br>9 | 345<br><br>168<br><br>99<br><br>71   | 1.1116<br>7E-09<br><br>1.2652<br>E-09<br><br>1.2958<br>E-09<br><br>1.3616<br>8E-09  | 1.94998<br>E-07<br><br>2.17779<br>E-07<br><br>2.20982<br>E-07<br><br>2.30087<br>E-07 |                                                                                                                                                                                                                                                                                                                                                                                                                                                                                                              |
| Measles<br>antigen<br>processing<br>and<br>presentation<br>of<br>endogenous<br>peptide<br>antigen<br>antigen<br>processing<br>and<br>presentation<br>of<br>exogenous<br>peptide<br>antigen<br>regulation of<br>response to<br>stress | KEGG<br><br>GO<br><br>GO                     | 11<br><br>6<br><br>12<br><br>34 | 133<br><br>15<br><br>183<br><br>1635 | 1.4254<br>7E-09<br><br>2.0040<br>9E-09<br><br>3.1274<br>E-09<br><br>3.5785<br>6E-09 | 2.36526<br>E-07<br><br>3.29565<br>E-07<br><br>5.09739<br>E-07<br><br>5.78157<br>E-07 | TAP2 B2M TAP1<br>HLA-C HLA-E HLA-A<br><br>TAP2 B2M HLA-G<br>PSMB9 FCGR1A<br>IFI30 TAP1 HLA-C<br>UNC93B1 HLA-F<br>HLA-E HLA-A<br>DDX60 SOCS1<br>STAT1 PLSCR1<br>HERC5 B2M RSAD2                                                                                                                                                                                                                                                                                                                               |



|                                                           |          |    |      |                 |                 |                                                                                                                                                                                                                                                                                                                                                                                                                                                                                                                                                                                                               |
|-----------------------------------------------------------|----------|----|------|-----------------|-----------------|---------------------------------------------------------------------------------------------------------------------------------------------------------------------------------------------------------------------------------------------------------------------------------------------------------------------------------------------------------------------------------------------------------------------------------------------------------------------------------------------------------------------------------------------------------------------------------------------------------------|
|                                                           |          |    |      |                 |                 | PSMB9 FCGR1A<br>DDX58 TAP1 NMI<br>IFIT1 IFI16 PML IFIH1<br>ZFP36 BIRC3<br>UNC93B1 IDO1 TLR3<br>XCL2 EIF2AK2 CCL4<br>IL6 LGALS9 HLA-E<br>CASP1 AMBRA1<br>CLEC4E TNFSF4<br>HLA-A CCL3L3<br>SAMHD1<br>CXCL11 DDX60<br>CXCL10 PLSCR1<br>TAP2 B2M RSAD2<br>HLA-G PSMB9<br>FCGR1A CXCL9<br>DDX58 TAP1 TRIM22<br>IFI16 PML IFIH1<br>BIRC3 HLA-C<br>UNC93B1 IDO1 TLR3<br>XCL2 TREM2<br>EIF2AK2 CCL4 HLA-F<br>IL6 LGALS9 HLA-E<br>CASP1 AMBRA1<br>UBD CLEC4E<br>TNFSF4 HLA-A<br>CCL20 CCL3L3<br>SHISA5 HCST<br>TESPA1 ECT2<br>TAP2 B2M HLA-G<br>PSMB9 FCGR1A<br>IFI30 TAP1 HLA-C<br>UNC93B1 RAB32<br>HLA-F HLA-E HLA-A |
| positive regulation of response to stimulus               | GO       | 42 | 2320 | 4.0205<br>5E-09 | 6.43917<br>E-07 |                                                                                                                                                                                                                                                                                                                                                                                                                                                                                                                                                                                                               |
| antigen processing and presentation                       | GO       | 13 | 232  | 4.3037<br>5E-09 | 6.83332<br>E-07 |                                                                                                                                                                                                                                                                                                                                                                                                                                                                                                                                                                                                               |
| antigen processing and presentation of exogenous antigen  | GO       | 12 | 190  | 4.6460<br>2E-09 | 7.31371<br>E-07 | TAP2 B2M HLA-G<br>PSMB9 FCGR1A<br>IFI30 TAP1 HLA-C<br>UNC93B1 HLA-F<br>HLA-E HLA-A                                                                                                                                                                                                                                                                                                                                                                                                                                                                                                                            |
| ER-Phagosome pathway                                      | REACTOME | 9  | 83   | 4.7781<br>2E-09 | 7.45791<br>E-07 | TAP2 B2M HLA-G<br>PSMB9 TAP1 HLA-C<br>HLA-F HLA-E HLA-A                                                                                                                                                                                                                                                                                                                                                                                                                                                                                                                                                       |
| antigen processing and presentation of endogenous antigen | GO       | 6  | 18   | 4.8951<br>2E-09 | 7.57633<br>E-07 | TAP2 B2M TAP1<br>HLA-C HLA-E HLA-A                                                                                                                                                                                                                                                                                                                                                                                                                                                                                                                                                                            |

|                                                                                |    |    |      |                 |                 |                                                                                                                                                                                                                                                                                                                                                                                                                                                                                                                                       |
|--------------------------------------------------------------------------------|----|----|------|-----------------|-----------------|---------------------------------------------------------------------------------------------------------------------------------------------------------------------------------------------------------------------------------------------------------------------------------------------------------------------------------------------------------------------------------------------------------------------------------------------------------------------------------------------------------------------------------------|
| TAP binding antigen processing and presentation of peptide antigen             | GO | 5  | 7    | 5.1390<br>7E-09 | 7.88762<br>E-07 | TAP2 TAP1 HLA-C<br>HLA-F HLA-A                                                                                                                                                                                                                                                                                                                                                                                                                                                                                                        |
| antigen binding                                                                | GO | 12 | 196  | 6.4437<br>5E-09 | 9.72795<br>E-07 | TAP2 B2M HLA-G<br>PSMB9 FCGR1A<br>IFI30 TAP1 HLA-C<br>UNC93B1 HLA-F<br>HLA-E HLA-A<br>HLA-G TAP1<br>KIR2DL3 LILRA2<br>HLA-C HLA-F HLA-E<br>HLA-A KLRD1<br>CXCL11 CXCL10<br>PLSCR1 FCGR1A<br>CXCL9 NMI IFI16<br>SP100 IDO1 TLR3<br>XCL2 CCL4 IL6                                                                                                                                                                                                                                                                                       |
| inflammatory response regulation by virus of viral protein levels in host cell | GO | 17 | 480  | 1.6111<br>2E-08 | 2.39304<br>E-06 | LGALS9 TNFSF4<br>CCL20 CCL3L3                                                                                                                                                                                                                                                                                                                                                                                                                                                                                                         |
| negative regulation of biological process                                      | GO | 70 | 5225 | 3.3730<br>6E-08 | 4.09422<br>E-06 | STAT1 TAP2 TAP1<br>IFIT1 DYNLT1<br>ISG15 IFITM1 OASL<br>MX1 CXCL10 OAS3<br>SOCS1 STAT1 IFI6<br>PLSCR1 HERC5<br>MDK UBE2L6 IFIT3<br>B2M RSAD2 HLA-G<br>PSMB9 LAMP3 IFI27<br>IFI30 DDX58 OAS1<br>ISG20 WARS TAP1<br>NMI IFIT1 TRIM22<br>DYNLT1 IFI16 ETV7<br>SP100 PML BCL2A1<br>IFIH1 ZFP36 RNF213<br>BIRC3 NFKBIE<br>LCMT1 GBP1<br>TRIM31 PGP SRGN<br>EGR2 CCNE1 PRTN3<br>IDO1 TLR3 XAF1<br>RGS1 CD83 EIF2AK2<br>RARRES3 PRAMEF1<br>CCL4 IL6 LGALS9<br>HLA-E PSMG2<br>AMBRA1 TNFSF4<br>HLA-A JUNB CCL3L3<br>RGS10 SYT4 ZNF831<br>SVBP |

|                                                                                   |           |    |      |                 |                 |                                                                                                                                                                                                                                                                                                                                                                                                  |
|-----------------------------------------------------------------------------------|-----------|----|------|-----------------|-----------------|--------------------------------------------------------------------------------------------------------------------------------------------------------------------------------------------------------------------------------------------------------------------------------------------------------------------------------------------------------------------------------------------------|
| chemokine activity                                                                | GO        | 7  | 48   | 3.7565<br>9E-08 | 5.44795<br>E-06 | CXCL11 CXCL10<br>CXCL9 XCL2 CCL4<br>CCL20 CCL3L3                                                                                                                                                                                                                                                                                                                                                 |
| MHC protein complex                                                               | GO        | 6  | 27   | 3.8467<br>9E-08 | 5.53517<br>E-06 | B2M HLA-G HLA-C<br>HLA-F HLA-E HLA-A                                                                                                                                                                                                                                                                                                                                                             |
| antigen processing and presentation of endogenous peptide antigen via MHC class I | GO        | 5  | 13   | 5.3968<br>E-08  | 7.70529<br>E-06 | TAP2 B2M TAP1<br>HLA-C HLA-A<br>CXCL11 STAT1 HLA-G<br>CXCL9 HLA-C<br>HLA-F HLA-E HLA-A                                                                                                                                                                                                                                                                                                           |
| Allograft Rejection peptide antigen binding                                       | WikiPathw | 8  | 80   | 5.9915<br>1E-08 | 8.48859<br>E-06 | HLA-F HLA-E HLA-A                                                                                                                                                                                                                                                                                                                                                                                |
| positive regulation of T cell cytokine production                                 | GO        | 6  | 30   | 6.6620<br>6E-08 | 9.36655<br>E-06 | HLA-G TAP1 HLA-C<br>HLA-F HLA-E HLA-A                                                                                                                                                                                                                                                                                                                                                            |
| regulation of cytokine secretion                                                  | GO        | 10 | 162  | 1.0268<br>3E-07 | 1.41135<br>E-05 | B2M RSAD2 IL6<br>TNFSF4 HLA-A<br>SOCS1 PML GBP1<br>SRGN CD58 IL6<br>LGALS9 CASP1<br>CLEC4E TNFSF4<br>ISG15 IFITM1 DDX60<br>CXCL10 SOCS1<br>STAT1 HERC5<br>UBE2L6 B2M RSAD2<br>HLA-G PSMB9<br>DDX58 WARS NMI<br>DYNLT1 IFI16 TYMP<br>SP100 PML IFIH1<br>ZFP36 BIRC3 GBP1<br>TYROBP SRGN<br>EGR2 IDO1 TLR3<br>CD58 CD83 EIF2AK2<br>CCL4 IL6 LGALS9<br>HLA-E CHRNA3<br>CASP1 CLEC4E<br>TNFSF4 HLA-A |
| regulation of multicellular organismal process                                    | GO        | 46 | 3013 | 1.1156<br>E-07  | 1.52201<br>E-05 | CCL20 TESPA1 SYT4<br>ECT2 SVBP<br>B2M HLA-G FCGR1A<br>LAMP3 PML HLA-C<br>SAMD9L SAMD9                                                                                                                                                                                                                                                                                                            |
| early endosome                                                                    | GO        | 13 | 311  | 1.1246<br>8E-07 | 1.52312<br>E-05 |                                                                                                                                                                                                                                                                                                                                                                                                  |

|                                                       |          |    |      |                 |                 |                                                                                                                                                                                                                                                                                                            |
|-------------------------------------------------------|----------|----|------|-----------------|-----------------|------------------------------------------------------------------------------------------------------------------------------------------------------------------------------------------------------------------------------------------------------------------------------------------------------------|
| response to tumor necrosis factor                     | GO       | 12 | 260  | 1.2131<br>4E-07 | 1.63093<br>E-05 | RAB32 TLR3 HLA-F<br>HLA-E HLA-A<br>STAT1 PSMB9<br>ZFP36 BIRC3 XCL2<br>CD58 CCL4 IL6 UBD<br>TNFSF4 CCL20<br>CCL3L3<br>CXCL11 DDX60<br>CXCL10 HERC5 B2M<br>FCGR1A CXCL9<br>DDX58 IFIT1 PML<br>ZFP36 BIRC3 IDO1<br>TLR3 XCL2 EIF2AK2<br>CCL4 IL6 LGALS9<br>CASP1 AMBRA1                                       |
| regulation of response to external stimulus           | GO       | 24 | 1072 | 1.3149<br>5E-07 | 1.75498<br>E-05 | TNFSF4 HLA-A<br>CCL3L3<br>TAP2 B2M HLA-G<br>FCGR1A TAP1 HLA-C<br>RAB32 HLA-F HLA-E<br>HLA-A<br>CXCL11 CXCL10<br>CXCL9 XCL2 CCL4<br>CCL20 CCL3L3<br>IFITM1 OASL MX1<br>OAS3 PLSCR1<br>RSAD2 OAS1 IFIT1<br>IFI16 SP100 EIF2AK2<br>CCL4                                                                       |
| endocytic vesicle membrane chemokine receptor binding | GO       | 10 | 167  | 1.3406<br>8E-07 | 1.77645<br>E-05 | CXCL11 CXCL10<br>CXCL9 XCL2 CCL4<br>CCL20 CCL3L3<br>IFITM1 OASL MX1<br>OAS3 PLSCR1<br>RSAD2 OAS1 IFIT1<br>IFI16 SP100 EIF2AK2<br>CCL4                                                                                                                                                                      |
| regulation of reproductive process                    | GO       | 12 | 265  | 1.4742<br>8E-07 | 1.88565<br>E-05 |                                                                                                                                                                                                                                                                                                            |
| positive regulation of T cell mediated immunity       | GO       | 6  | 35   | 1.4991<br>1E-07 | 1.90417<br>E-05 | B2M RSAD2 IL6 HLA-E<br>TNFSF4 HLA-A<br>ISG15 SOCS1<br>HERC5 UBE2L6 B2M<br>PSMB9 FCGR1A<br>DDX58 DYNLT1 IFI16<br>IFIH1 BIRC3 HLA-C<br>ATP6V1F UNC93B1<br>TYROBP PRTN3<br>TLR3 CD58 TREM2<br>HLA-E CASP1<br>CLEC4E HLA-A<br>DSN1 KLRD1<br>HLA-G KIR2DL3 HLA-C<br>TYROBP HLA-E<br>KIR2DL2 HLA-A<br>KLRD1 HCST |
| Innate Immune System                                  | REACTOME | 26 | 1247 | 1.6215<br>E-07  | 2.00192<br>E-05 |                                                                                                                                                                                                                                                                                                            |
| Natural killer cell mediated cytotoxicity             | KEGG     | 9  | 129  | 1.6412<br>8E-07 | 2.00192<br>E-05 |                                                                                                                                                                                                                                                                                                            |

|                                                  |      |     |       |                 |                 |                                                                                                                                                                                                                                                                                                                                                                                                                                       |
|--------------------------------------------------|------|-----|-------|-----------------|-----------------|---------------------------------------------------------------------------------------------------------------------------------------------------------------------------------------------------------------------------------------------------------------------------------------------------------------------------------------------------------------------------------------------------------------------------------------|
| Hepatitis C                                      | KEGG | 9   | 130   | 1.7454<br>1E-07 | 2.10111<br>E-05 | OAS3 STAT1 OAS2<br>DDX58 OAS1 IRF9<br>IFIT1 TLR3 EIF2AK2<br>TAP2 B2M HLA-G<br>FCGR1A TAP1 HLA-<br>C UNC93B1 RAB32                                                                                                                                                                                                                                                                                                                     |
| endocytic<br>vesicle                             | GO   | 12  | 277   | 2.3158<br>2E-07 | 2.76966<br>E-05 | HLA-F HLA-E<br>AMBRA1 HLA-A<br>ISG15 IFITM1 OASL<br>MX1 CXCL10 OAS3<br>SOCS1 STAT1 IFI6<br>PLSCR1 MDK IFIT3<br>B2M RSAD2 HLA-G<br>PSMB9 LAMP3 IFI27<br>IFI30 OAS1 ISG20<br>WARS NMI IFIT1<br>TRIM22 DYNLT1<br>IFI16 ETV7 SP100<br>PML BCL2A1 ZFP36<br>RNF213 BIRC3<br>NFKBIE LCMT1<br>GBP1 TRIM31 PGP<br>SRGN EGR2 CCNE1<br>PRTN3 IDO1 TLR3<br>XAF1 RGS1 EIF2AK2<br>RARRES3 PRAMEF1<br>CCL4 IL6 LGALS9<br>PSMG2 AMBRA1<br>TNFSF4 JUNB |
| negative<br>regulation of<br>cellular<br>process | GO   | 62  | 4693  | 2.4462<br>5E-07 | 2.90678<br>E-05 | CCL3L3 RGS10 SYT4<br>ZNF831 SVBP<br>ISG15 IFITM1 OASL<br>CXCL11 MX1 DDX60<br>IFI35 CXCL10 OAS3<br>SOCS1 STAT1 IFI6<br>PLSCR1 TAP2<br>HERC5 MDK OAS2<br>UBE2L6 IFIT3 B2M<br>RSAD2 HLA-G<br>PSMB9 FCGR1A<br>LAMP3 IFI27 IFI30<br>CXCL9 SP110 DDX58<br>OAS1 ISG20 WARS<br>RNF19B IRF9 TDRD7<br>TAP1 NMI IFIT1<br>TRIM22 DYNLT1<br>KIR2DL3 OR4C15<br>IFI16 IFIT2 TYMP<br>ETV7 SP100 PML                                                   |
| regulation of<br>biological<br>process           | GO   | 122 | 11240 | 2.9252<br>2E-07 | 3.43243<br>E-05 | BCL2A1 LILRA2 TTF2<br>IFIH1 ZFP36 RNF213                                                                                                                                                                                                                                                                                                                                                                                              |

|                                                                 |      |    |     |                 |                 |                                                                                                                                                                                                                                                                                                                                                                                                                                                                                                      |
|-----------------------------------------------------------------|------|----|-----|-----------------|-----------------|------------------------------------------------------------------------------------------------------------------------------------------------------------------------------------------------------------------------------------------------------------------------------------------------------------------------------------------------------------------------------------------------------------------------------------------------------------------------------------------------------|
|                                                                 |      |    |     |                 |                 | BIRC3 NFKBIE HLA-C<br>KPNA2 SAMD9L<br>LCMT1 GBP1<br>ATP6V1F TRIM31<br>PGP UNC93B1<br>RAB32 TYROBP<br>SRGN EGR2 CCNE1<br>LAIR2 PRTN3 IDO1<br>TLR3 XAF1 MELK<br>XCL2 RGS1 HELZ2<br>CD58 CD83 TREM2<br>EIF2AK2 RARRES3<br>PRAMEF1 CCL4<br>HLA-F ZNFX1 IL6<br>LGALS9 HLA-E<br>CHRNA3 MX2 CASP1<br>PSMG2 AMBRA1<br>OR2B6 KIR2DL2 UBD<br>CLEC4E TNFSF4<br>HLA-A GNA15 JUNB<br>CCL20 CCL3L3<br>SHISA5 KLRD1<br>RGS10 HCST<br>TESPA1 SYT4<br>SAMHD1 OR4C45<br>ZNF831 ECT2<br>OR52E8 RASSF3<br>CSH1 GBP2 SVBP |
| regulation of<br>cysteine-<br>type<br>endopeptidase<br>activity | GO   | 11 | 231 | 2.9258<br>9E-07 | 3.43243<br>E-05 | IFI6 PSMB9 LAMP3<br>IFI27 IFI16 PML<br>BIRC3 TLR3 IL6<br>LGALS9 CASP1<br>HLA-G TAP1 NMI<br>IFIT1 IFI16 ZFP36<br>GBP1 IDO1 TLR3<br>EIF2AK2 LGALS9<br>HLA-E TNFSF4 HLA-A                                                                                                                                                                                                                                                                                                                               |
| negative<br>regulation of<br>immune<br>system<br>process        | GO   | 14 | 401 | 3.1005<br>1E-07 | 3.61425<br>E-05 |                                                                                                                                                                                                                                                                                                                                                                                                                                                                                                      |
| Toll-like<br>receptor<br>signaling<br>pathway                   | KEGG | 8  | 102 | 3.3957<br>6E-07 | 3.90894<br>E-05 | CXCL11 CXCL10<br>STAT1 CXCL9 TLR3<br>CCL4 IL6 CCL3L3<br>STAT1 PSMB9<br>ZFP36 BIRC3 XCL2<br>CD58 CCL4 IL6                                                                                                                                                                                                                                                                                                                                                                                             |
| cellular<br>response to<br>tumor<br>necrosis<br>factor          | GO   | 11 | 236 | 3.5804<br>8E-07 | 4.09598<br>E-05 | TNFSF4 CCL20<br>CCL3L3<br>DDX60 PLSCR1                                                                                                                                                                                                                                                                                                                                                                                                                                                               |
| positive<br>regulation of<br>innate                             | GO   | 13 | 348 | 3.8135<br>6E-07 | 4.33569<br>E-05 | RSAD2 PSMB9<br>DDX58 IFI16 IFIH1                                                                                                                                                                                                                                                                                                                                                                                                                                                                     |

immune  
response

BIRC3 UNC93B1  
TLR3 LGALS9 HLA-E  
CLEC4E  
ISG15 IFITM1 OASL  
CXCL11 MX1 DDX60  
IFI35 CXCL10 OAS3  
SOCS1 STAT1 IFI6  
PLSCR1 TAP2  
HERC5 MDK OAS2  
IFIT3 B2M RSAD2  
HLA-G PSMB9  
FCGR1A LAMP3  
IFI27 IFI30 CXCL9  
SP110 DDX58 OAS1  
ISG20 WARS  
RNF19B IRF9 TAP1  
NMI IFIT1 TRIM22  
DYNLT1 OR4C15  
IFI16 IFIT2 TYMP  
ETV7 SP100 PML  
BCL2A1 LILRA2 TTF2  
IFIH1 ZFP36 RNF213  
BIRC3 NFKBIE HLA-  
C KPNA2 LCMT1  
GBP1 ATP6V1F  
TRIM31 PGP  
UNC93B1 RAB32  
TYROBP SRGN  
EGR2 CCNE1 PRTN3  
IDO1 TLR3 XAF1  
MELK XCL2 RGS1  
HELZ2 CD58 CD83  
TREM2 EIF2AK2  
RARRES3 PRAMEF1  
CCL4 HLA-F ZNFX1  
IL6 LGALS9 HLA-E  
CHRNA3 MX2 CASP1  
PSMG2 AMBRA1  
OR2B6 UBD CLEC4E  
TNFSF4 HLA-A  
GNA15 JUNB CCL20  
CCL3L3 SHISA5  
KLRD1 RGS10 HCST  
TESPA1 SYT4  
SAMHD1 OR4C45  
ZNF831 ECT2  
OR52E8 RASSF3  
CSH1 GBP2 SVBP  
TAP1 NMI IFI16  
LGALS9 HLA-E HLA-  
A

regulation of  
cellular  
process GO  
negative  
regulation of  
innate GO

|     |       |                 |                |
|-----|-------|-----------------|----------------|
| 116 | 10629 | 4.4417<br>6E-07 | 4.9959E<br>-05 |
| 6   | 43    | 4.4756<br>4E-07 | 4.9959E<br>-05 |

|                                                         |    |     |       |                 |                 |  |  |  |  |                                                                                                                                                                                                                                                                                                                                                                                                                                                                                               |
|---------------------------------------------------------|----|-----|-------|-----------------|-----------------|--|--|--|--|-----------------------------------------------------------------------------------------------------------------------------------------------------------------------------------------------------------------------------------------------------------------------------------------------------------------------------------------------------------------------------------------------------------------------------------------------------------------------------------------------|
| immune response                                         |    |     |       |                 |                 |  |  |  |  |                                                                                                                                                                                                                                                                                                                                                                                                                                                                                               |
| lymphocyte chemotaxis                                   | GO | 6   | 43    | 4.4756<br>4E-07 | 4.9959E<br>-05  |  |  |  |  | CXCL11 CXCL10<br>CXCL9 XCL2 CCL20<br>CCL3L3<br>ISG15 STAT1 B2M<br>HLA-G ZFP36                                                                                                                                                                                                                                                                                                                                                                                                                 |
| regulation of hemopoiesis                               | GO | 13  | 355   | 4.7245<br>4E-07 | 5.24196<br>E-05 |  |  |  |  | TYROBP TLR3 CD83<br>EIF2AK2 IL6 LGALS9<br>TNFSF4 TESPA1<br>ISG15 CXCL10<br>STAT1 HERC5<br>UBE2L6 B2M HLA-G<br>DDX58 NMI DYNLT1<br>SP100 PML IFIH1<br>ZFP36 GBP1 SRGN<br>IDO1 TLR3 CD83 IL6<br>LGALS9 TNFSF4<br>SYT4 SVBP                                                                                                                                                                                                                                                                      |
| negative regulation of multicellular organismal process | GO | 24  | 1160  | 5.0187<br>8E-07 | 5.43741<br>E-05 |  |  |  |  |                                                                                                                                                                                                                                                                                                                                                                                                                                                                                               |
| negative regulation of type I interferon production     | GO | 6   | 44    | 5.0600<br>7E-07 | 5.45008<br>E-05 |  |  |  |  | ISG15 HERC5<br>UBE2L6 DDX58 NMI<br>IFIH1                                                                                                                                                                                                                                                                                                                                                                                                                                                      |
| chemokine-mediated signaling pathway                    | GO | 7   | 73    | 5.1592<br>6E-07 | 5.5246E<br>-05  |  |  |  |  | CXCL11 CXCL10<br>CXCL9 XCL2 CCL4<br>CCL20 CCL3L3<br>ISG15 IFITM1 OASL<br>CXCL11 MX1 DDX60<br>IFI35 CXCL10 OAS3<br>SOCS1 STAT1 RTP4<br>IFI6 PLSCR1 TAP2<br>HERC5 MDK OAS2<br>UBE2L6 TRIM69<br>IFIT3 B2M RSAD2<br>HLA-G PSMB9<br>FCGR1A IFI27 IFI30<br>CXCL9 DDX58 OAS1<br>WARS RNF19B IRF9<br>TDRD7 TAP1<br>CENPW NMI IFIT1<br>TRIM22 DYNLT1<br>KIR2DL3 IFI16 IFIT2<br>TYMP ETV7 SP100<br>PML BCL2A1 TTF2<br>IFIH1 ZFP36 RPL39L<br>RNF213 BIRC3<br>NFKBIE HLA-C<br>KPNA2 NCAPG<br>SAMD9L LCMT1 |
| protein binding                                         | GO | 117 | 10853 | 5.4961<br>7E-07 | 5.81773<br>E-05 |  |  |  |  |                                                                                                                                                                                                                                                                                                                                                                                                                                                                                               |



|                                                         |      |    |     |                 |                 |                                                                                                                                                                                                                                                                                                                                                                                                                                                                                            |
|---------------------------------------------------------|------|----|-----|-----------------|-----------------|--------------------------------------------------------------------------------------------------------------------------------------------------------------------------------------------------------------------------------------------------------------------------------------------------------------------------------------------------------------------------------------------------------------------------------------------------------------------------------------------|
|                                                         |      |    |     |                 |                 | GBP1 SAMD9<br>ATP6V1F TRIM31<br>UNC93B1 RAB32<br>TYROBP SRGN<br>APOL6 EGR2 CCNE1<br>LAIR2 PRTN3 TLR3<br>ORAI2 MELK XCL2<br>RGS1 SYNGR2<br>HELZ2 CD58 TREM2<br>EIF2AK2 RARRES3<br>PRAMEF1 CCL4<br>VAMP5 HLA-F IL6<br>LGALS9 HLA-E<br>CHRNA3 MX2 CASP1<br>PSMG2 AMBRA1<br>UBD TNFSF4 HLA-A<br>GNA15 JUNB<br>SPRR2A CCL20<br>CCL3L3 DSN1<br>SHISA5 KLRD1<br>RGS10 HCST<br>TESPA1 SYT4<br>SAMHD1 ECT2<br>RASSF3 CSH1 GBP2<br>HLA-G IRF9 SP100<br>HLA-C EGR2 CCNE1<br>EIF2AK2 HLA-F HLA-E HLA-A |
| Viral carcinogenesis                                    | KEGG | 10 | 198 | 5.9056<br>1E-07 | 6.11065<br>E-05 |                                                                                                                                                                                                                                                                                                                                                                                                                                                                                            |
| regulation of T cell cytokine production                | GO   | 5  | 23  | 5.8917<br>8E-07 | 6.11065<br>E-05 | B2M RSAD2 IL6<br>TNFSF4 HLA-A                                                                                                                                                                                                                                                                                                                                                                                                                                                              |
| response to interferon-beta                             | GO   | 5  | 23  | 5.8917<br>8E-07 | 6.11065<br>E-05 | IFITM1 STAT1<br>PLSCR1 TLR3 XAF1<br>TAP2 HLA-G<br>FCGR1A TAP1 HLA-C<br>ATP6V1F HLA-F<br>HLA-E HLA-A                                                                                                                                                                                                                                                                                                                                                                                        |
| Phagosome positive regulation of T cell differentiation | KEGG | 9  | 153 | 6.3513<br>5E-07 | 6.49884<br>E-05 |                                                                                                                                                                                                                                                                                                                                                                                                                                                                                            |
|                                                         | GO   | 7  | 76  | 6.6381<br>6E-07 | 6.75479<br>E-05 | SOCS1 HLA-G CD83<br>IL6 LGALS9 TNFSF4<br>TESPA1<br>SOCS1 RSAD2 IFI27<br>DDX58 SP100 PML<br>NFKBIE GBP1 SRGN<br>TLR3 CD58 IL6<br>LGALS9 HLA-E<br>CASP1 CLEC4E<br>TNFSF4 SYT4 ECT2                                                                                                                                                                                                                                                                                                           |
| regulation of protein transport                         | GO   | 19 | 787 | 7.5687<br>4E-07 | 7.6594E<br>-05  |                                                                                                                                                                                                                                                                                                                                                                                                                                                                                            |

|                                                     |    |     |      |                 |                 |                                                                                                                                                                                                                                                                                                                                                                                                                                                                                                                                                                                                                                           |
|-----------------------------------------------------|----|-----|------|-----------------|-----------------|-------------------------------------------------------------------------------------------------------------------------------------------------------------------------------------------------------------------------------------------------------------------------------------------------------------------------------------------------------------------------------------------------------------------------------------------------------------------------------------------------------------------------------------------------------------------------------------------------------------------------------------------|
|                                                     |    |     |      |                 |                 | SOCS1 RSAD2 IFI27<br>DDX58 TRIM22<br>SP100 PML NFKBIE<br>GBP1 SRGN CCNE1<br>TLR3 CD58 TREM2<br>IL6 LGALS9 HLA-E<br>CASP1 CLEC4E<br>TNFSF4 SYT4 ECT2                                                                                                                                                                                                                                                                                                                                                                                                                                                                                       |
| regulation of<br>protein<br>localization            | GO | 22  | 1027 | 7.9875<br>9E-07 | 7.9954E<br>-05  |                                                                                                                                                                                                                                                                                                                                                                                                                                                                                                                                                                                                                                           |
| regulation of<br>type I<br>interferon<br>production | GO | 8   | 116  | 8.4685<br>6E-07 | 8.43102<br>E-05 | ISG15 HERC5<br>UBE2L6 DDX58 NMI<br>IFI16 IFIH1 TLR3<br>TAP1 NMI IFIT1 IFI16<br>ZFP36 EIF2AK2                                                                                                                                                                                                                                                                                                                                                                                                                                                                                                                                              |
| negative<br>regulation of<br>defense<br>response    | GO | 9   | 161  | 9.4879<br>6E-07 | 9.39512<br>E-05 | LGALS9 HLA-E HLA-<br>A<br>ISG15 OASL CMPK2<br>HERC6 MX1 DDX60<br>IFI35 OAS3 SOCS1<br>STAT1 IFI6 PLSCR1<br>TAP2 HERC5 PPA1<br>OAS2 UBE2L6<br>TRIM69 IFIT3 B2M<br>SLC15A3 RSAD2<br>HLA-G PSMB9<br>FCGR1A LAMP3<br>IFI27 IFI30 DDX58<br>OAS1 WARS<br>RNF19B IRF9 TDRD7<br>TAP1 NMI IFIT1<br>TRIM22 DYNLT1<br>IFI16 IFIT2 TYMP<br>PML BCL2A1 TTF2<br>IFIH1 ZFP36 RPL39L<br>MSRA RNF213<br>BIRC3 NFKBIE HLA-<br>C KPNA2 NCAPG<br>SAMD9L UQCRHL<br>NT5C3A MRPS18C<br>LCMT1 GBP1 SAMD9<br>GBP4 ATP6V1F<br>TRIM31 PGP<br>UNC93B1 RAB32<br>TYROBP SRGN<br>CCNE1 PRTN3 IDO1<br>TLR3 XAF1 MELK<br>RGS1 SYNGR2 CD58<br>EIF2AK2 RARRES3<br>VAMP5 HLA-F |
| cytoplasmic<br>part                                 | GO | 102 | 9320 | 9.5708<br>2E-07 | 9.42649<br>E-05 | LGALS9 HLA-E MX2<br>CASP1 PSMG2                                                                                                                                                                                                                                                                                                                                                                                                                                                                                                                                                                                                           |

|                                                      |    |     |       |                 |                 |                                                                                                                                                                                                                                                                                                                                                                                                                                                                                                                                          |
|------------------------------------------------------|----|-----|-------|-----------------|-----------------|------------------------------------------------------------------------------------------------------------------------------------------------------------------------------------------------------------------------------------------------------------------------------------------------------------------------------------------------------------------------------------------------------------------------------------------------------------------------------------------------------------------------------------------|
| early endosome membrane                              | GO | 8   | 119   | 1.0147<br>1E-06 | 9.94091<br>E-05 | AMBRA1 HLA-A<br>GNA15 SPRR2A<br>DSN1 SHISA5<br>RGS10 TESPA1<br>SYT4 BOLA3 ECT2<br>RASSF3 CSH1 GBP2<br>B2M HLA-G FCGR1A<br>PML HLA-C HLA-F<br>HLA-E HLA-A<br>CXCL11 CXCL10<br>CXCL9 SP100 XCL2                                                                                                                                                                                                                                                                                                                                            |
| cytokine activity                                    | GO | 10  | 215   | 1.2002<br>8E-06 | 0.00011<br>6967 | CCL4 IL6 TNFSF4<br>CCL20 CCL3L3<br>CXCL11 DDX60<br>CXCL10 FCGR1A<br>CXCL9 IDO1 TLR3<br>XCL2 CCL4 IL6                                                                                                                                                                                                                                                                                                                                                                                                                                     |
| positive regulation of response to external stimulus | GO | 14  | 453   | 1.2334<br>3E-06 | 0.00011<br>9565 | LGALS9 AMBRA1<br>TNFSF4 CCL3L3                                                                                                                                                                                                                                                                                                                                                                                                                                                                                                           |
| positive regulation of alpha-beta T cell activation  | GO | 6   | 53    | 1.3704<br>1E-06 | 0.00013<br>2148 | CD83 IL6 LGALS9<br>HLA-E TNFSF4 HLA-A<br>ISG15 IFITM1 OASL<br>CMPK2 HERC6<br>CXCL11 MX1 IFI35<br>CXCL10 OAS3<br>SOCS1 STAT1 RTP4<br>IFI6 PLSCR1 TAP2<br>HERC5 PPA1 MDK<br>OAS2 UBE2L6<br>TRIM69 IFIT3 B2M<br>SLC15A3 RSAD2<br>HLA-G PSMB9<br>FCGR1A LAMP3<br>IFI27 IFI30 CXCL9<br>SP110 DDX58 OAS1<br>ISG20 WARS<br>RNF19B IRF9 TDRD7<br>TAP1 CENPW NMI<br>IFIT1 TRIM22<br>DYNLT1 OR4C15<br>IFI16 IFIT2 TYMP<br>ETV7 SP100 PML<br>BCL2A1 LILRA2 TTF2<br>IFIH1 ZFP36 MSRA<br>RNF213 BIRC3<br>NFKBIE HLA-C<br>KPNA2 NCAPG<br>SAMD9L UQCRHL |
| single-organism cellular process                     | GO | 133 | 12938 | 1.3881<br>2E-06 | 0.00013<br>3158 |                                                                                                                                                                                                                                                                                                                                                                                                                                                                                                                                          |

|                                                    |    |    |      |                 |                 |                    |
|----------------------------------------------------|----|----|------|-----------------|-----------------|--------------------|
|                                                    |    |    |      |                 |                 | NT5C3A MRPS18C     |
|                                                    |    |    |      |                 |                 | LCMT1 GBP1 SAMD9   |
|                                                    |    |    |      |                 |                 | GBP4 ATP6V1F       |
|                                                    |    |    |      |                 |                 | TRIM31 PGP         |
|                                                    |    |    |      |                 |                 | UNC93B1 RAB32      |
|                                                    |    |    |      |                 |                 | TYROBP SRGN        |
|                                                    |    |    |      |                 |                 | EGR2 CCNE1 PRTN3   |
|                                                    |    |    |      |                 |                 | IDO1 TLR3 XAF1     |
|                                                    |    |    |      |                 |                 | ORAI2 MELK XCL2    |
|                                                    |    |    |      |                 |                 | RGS1 SYNGR2        |
|                                                    |    |    |      |                 |                 | HELZ2 CD58 CD83    |
|                                                    |    |    |      |                 |                 | TREM2 EIF2AK2      |
|                                                    |    |    |      |                 |                 | RARRES3 CCL4       |
|                                                    |    |    |      |                 |                 | VAMP5 HLA-F IL6    |
|                                                    |    |    |      |                 |                 | LGALS9 HLA-E       |
|                                                    |    |    |      |                 |                 | CHRNA3 MX2 CASP1   |
|                                                    |    |    |      |                 |                 | PSMG2 AMBRA1       |
|                                                    |    |    |      |                 |                 | OR2B6 UBD CLEC4E   |
|                                                    |    |    |      |                 |                 | TNFSF4 HLA-A       |
|                                                    |    |    |      |                 |                 | GNA15 JUNB         |
|                                                    |    |    |      |                 |                 | SPRR2A CCL20       |
|                                                    |    |    |      |                 |                 | CCL3L3 DSN1        |
|                                                    |    |    |      |                 |                 | SHISA5 KLRD1       |
|                                                    |    |    |      |                 |                 | RGS10 SYT4         |
|                                                    |    |    |      |                 |                 | SAMHD1 OR4C45      |
|                                                    |    |    |      |                 |                 | ZNF831 ECT2        |
|                                                    |    |    |      |                 |                 | OR52E8 RASSF3      |
|                                                    |    |    |      |                 |                 | CSH1 GBP2 SVBP     |
|                                                    |    |    |      |                 |                 | ISG15 IFITM1       |
|                                                    |    |    |      |                 |                 | CXCL11 DDX60       |
|                                                    |    |    |      |                 |                 | CXCL10 SOCS1       |
|                                                    |    |    |      |                 |                 | STAT1 PLSCR1       |
|                                                    |    |    |      |                 |                 | TAP2 MDK B2M       |
|                                                    |    |    |      |                 |                 | RSAD2 HLA-G        |
|                                                    |    |    |      |                 |                 | PSMB9 FCGR1A       |
|                                                    |    |    |      |                 |                 | LAMP3 IFI27 CXCL9  |
|                                                    |    |    |      |                 |                 | DDX58 WARS         |
|                                                    |    |    |      |                 |                 | RNF19B TAP1 NMI    |
|                                                    |    |    |      |                 |                 | IFIT1 TRIM22 IFI16 |
|                                                    |    |    |      |                 |                 | IFIT2 SP100 PML    |
|                                                    |    |    |      |                 |                 | BCL2A1 IFIH1 ZFP36 |
|                                                    |    |    |      |                 |                 | BIRC3 HLA-C        |
|                                                    |    |    |      |                 |                 | TRIM31 UNC93B1     |
|                                                    |    |    |      |                 |                 | EGR2 CCNE1 PRTN3   |
|                                                    |    |    |      |                 |                 | IDO1 TLR3 MELK     |
|                                                    |    |    |      |                 |                 | XCL2 RGS1 HELZ2    |
|                                                    |    |    |      |                 |                 | CD58 CD83 TREM2    |
|                                                    |    |    |      |                 |                 | EIF2AK2 PRAMEF1    |
|                                                    |    |    |      |                 |                 | CCL4 HLA-F IL6     |
|                                                    |    |    |      |                 |                 | LGALS9 HLA-E       |
|                                                    |    |    |      |                 |                 | CHRNA3 CASP1       |
| positive<br>regulation of<br>biological<br>process | GO | 71 | 5953 | 1.4343<br>1E-06 | 0.00013<br>6393 |                    |

|                                                       |    |     |       |                 |                 |                                                                                                                                                                                                                                                                                                                                                                                                                                                                                                                                                                                                                                                                                                                                                                              |
|-------------------------------------------------------|----|-----|-------|-----------------|-----------------|------------------------------------------------------------------------------------------------------------------------------------------------------------------------------------------------------------------------------------------------------------------------------------------------------------------------------------------------------------------------------------------------------------------------------------------------------------------------------------------------------------------------------------------------------------------------------------------------------------------------------------------------------------------------------------------------------------------------------------------------------------------------------|
|                                                       |    |     |       |                 |                 | AMBRA1 UBD<br>CLEC4E TNFSF4<br>HLA-A JUNB CCL20<br>CCL3L3 SHISA5<br>RGS10 HCST<br>TESPA1 SYT4 ECT2                                                                                                                                                                                                                                                                                                                                                                                                                                                                                                                                                                                                                                                                           |
| positive<br>regulation of<br>inflammatory<br>response | GO | 8   | 125   | 1.4366<br>5E-06 | 0.00013<br>6393 | FCGR1A IDO1 TLR3<br>XCL2 CCL4 IL6<br>TNFSF4 CCL3L3<br>CXCL11 CXCL10                                                                                                                                                                                                                                                                                                                                                                                                                                                                                                                                                                                                                                                                                                          |
| leukocyte<br>chemotaxis                               | GO | 8   | 126   | 1.5197<br>6E-06 | 0.00014<br>3543 | CXCL9 XCL2 CCL4<br>IL6 CCL20 CCL3L3<br>ISG15 IFITM1 OASL<br>CXCL11 MX1 DDX60<br>IFI35 CXCL10 OAS3<br>SOCS1 STAT1 IFI6<br>PLSCR1 TAP2<br>HERC5 MDK OAS2<br>UBE2L6 IFIT3 B2M<br>RSAD2 HLA-G<br>PSMB9 FCGR1A<br>LAMP3 IFI27 IFI30<br>CXCL9 SP110 DDX58<br>OAS1 ISG20 WARS<br>RNF19B IRF9 TDRD7<br>TAP1 NMI IFIT1<br>TRIM22 DYNLT1<br>KIR2DL3 OR4C15<br>IFI16 IFIT2 TYMP<br>ETV7 SP100 PML<br>BCL2A1 LILRA2 TTF2<br>IFIH1 ZFP36 RNF213<br>BIRC3 NFKBIE HLA-<br>C KPNA2 SAMD9L<br>LCMT1 GBP1<br>ATP6V1F TRIM31<br>PGP UNC93B1<br>RAB32 TYROBP<br>SRGN EGR2 CCNE1<br>LAIR2 PRTN3 IDO1<br>TLR3 XAF1 MELK<br>XCL2 RGS1 HELZ2<br>CD58 CD83 TREM2<br>EIF2AK2 RARRES3<br>PRAMEF1 CCL4<br>VAMP5 HLA-F ZNFX1<br>IL6 LGALS9 HLA-E<br>CHRNA3 MX2 CASP1<br>PSMG2 AMBRA1<br>OR2B6 KIR2DL2 UBD |
| biological<br>regulation                              | GO | 123 | 11844 | 1.6210<br>2E-06 | 0.00015<br>0788 |                                                                                                                                                                                                                                                                                                                                                                                                                                                                                                                                                                                                                                                                                                                                                                              |

|                                                                      |      |    |     |                 |                 |                                                                                                                                                                   |
|----------------------------------------------------------------------|------|----|-----|-----------------|-----------------|-------------------------------------------------------------------------------------------------------------------------------------------------------------------|
|                                                                      |      |    |     |                 |                 | CLEC4E TNFSF4<br>HLA-A GNA15 JUNB<br>CCL20 CCL3L3<br>SHISA5 KLRD1<br>RGS10 HCST<br>TESPA1 SYT4<br>SAMHD1 OR4C45<br>ZNF831 ECT2<br>OR52E8 RASSF3<br>CSH1 GBP2 SVBP |
| integral component of luminal side of endoplasmic reticulum membrane | GO   | 5  | 29  | 1.6194<br>2E-06 | 0.00015<br>0788 | HLA-G HLA-C HLA-F<br>HLA-E HLA-A                                                                                                                                  |
| luminal side of endoplasmic reticulum membrane                       | GO   | 5  | 29  | 1.6194<br>2E-06 | 0.00015<br>0788 | HLA-G HLA-C HLA-F<br>HLA-E HLA-A                                                                                                                                  |
| positive regulation of lymphocyte differentiation                    | GO   | 7  | 88  | 1.6594<br>E-06  | 0.00015<br>3582 | SOCS1 HLA-G CD83<br>IL6 LGALS9 TNFSF4<br>TESPA1<br>SOCS1 STAT1<br>FCGR1A IRF9                                                                                     |
| Osteoclast differentiation                                           | KEGG | 8  | 128 | 1.6983<br>E-06  | 0.00015<br>5618 | LILRA2 TYROBP<br>TREM2 JUNB                                                                                                                                       |
| positive regulation of leukocyte migration                           | GO   | 8  | 129 | 1.7940<br>5E-06 | 0.00016<br>3578 | CXCL11 CXCL10<br>CXCL9 XCL2 CCL4<br>IL6 LGALS9 CCL20<br>CXCL11 CXCL10                                                                                             |
| lymphocyte migration                                                 | GO   | 6  | 56  | 1.8413<br>8E-06 | 0.00016<br>7066 | CXCL9 XCL2 CCL20<br>CCL3L3                                                                                                                                        |
| negative regulation of immune response                               | GO   | 8  | 130 | 1.8943<br>5E-06 | 0.00017<br>103  | HLA-G TAP1 NMI<br>IFI16 LGALS9 HLA-E<br>TNFSF4 HLA-A<br>SOCS1 RSAD2 IFI27<br>DDX58 SP100 PML<br>NFKBIE GBP1 SRGN<br>TLR3 CD58 IL6<br>LGALS9 HLA-E                 |
| regulation of peptide transport                                      | GO   | 19 | 842 | 1.9458<br>7E-06 | 0.00017<br>4825 | CASP1 CLEC4E<br>TNFSF4 SYT4 ECT2                                                                                                                                  |
| positive regulation of                                               | GO   | 20 | 927 | 2.0928<br>7E-06 | 0.00018<br>7119 | CXCL11 DDX60<br>CXCL10 CXCL9                                                                                                                                      |

|                                                                                   |    |    |      |                 |                 |                                                                                                                                                                                                                                                                                                                                                                                                                                                                                                                                                                                        |
|-----------------------------------------------------------------------------------|----|----|------|-----------------|-----------------|----------------------------------------------------------------------------------------------------------------------------------------------------------------------------------------------------------------------------------------------------------------------------------------------------------------------------------------------------------------------------------------------------------------------------------------------------------------------------------------------------------------------------------------------------------------------------------------|
| intracellular<br>signal<br>transduction                                           |    |    |      |                 |                 | TRIM22 BIRC3 TLR3<br>XCL2 TREM2<br>EIF2AK2 CCL4 IL6<br>LGALS9 CASP1 UBD<br>CCL20 CCL3L3<br>SHISA5 HCST ECT2<br>ISG15 IFITM1 DDX60<br>STAT1 B2M RSAD2<br>HLA-G DDX58 IFI16<br>PML IFIH1 IDO1<br>TLR3 CD58 CD83<br>EIF2AK2 CCL4 IL6<br>LGALS9 HLA-E<br>CASP1 CLEC4E<br>TNFSF4 HLA-A<br>CCL20 TESPA1 SYT4<br>ECT2<br>STAT1 IFI6 MDK<br>IFIT3 LAMP3 IFI27<br>IFIT2 SP100 PML<br>BCL2A1 ZFP36<br>BIRC3 LCMT1 IDO1<br>TLR3 MELK EIF2AK2<br>PRAMEF1 IL6<br>LGALS9 CASP1<br>PSMG2 AMBRA1<br>UBD ECT2 RASSF3<br>TAP2 FCGR1A<br>LAMP3 RNF19B<br>TAP1 LILRA2 HMHB1<br>UNC93B1 IL6 HLA-E<br>TNFSF4 |
| positive<br>regulation of<br>multicellular<br>organismal<br>process               | GO | 28 | 1626 | 2.1336<br>6E-06 | 0.00018<br>9844 |                                                                                                                                                                                                                                                                                                                                                                                                                                                                                                                                                                                        |
| regulation of<br>apoptotic<br>process                                             | GO | 26 | 1446 | 2.1823<br>8E-06 | 0.00019<br>3245 |                                                                                                                                                                                                                                                                                                                                                                                                                                                                                                                                                                                        |
| adaptive<br>immune<br>response<br>ER to Golgi<br>transport<br>vesicle<br>membrane | GO | 11 | 287  | 2.2120<br>2E-06 | 0.00019<br>4933 |                                                                                                                                                                                                                                                                                                                                                                                                                                                                                                                                                                                        |
| pyrophosph<br>atase<br>activity                                                   | GO | 19 | 851  | 2.2229<br>9E-06 | 0.00019<br>4967 | B2M HLA-G HLA-C<br>HLA-F HLA-E HLA-A<br>MX1 DDX60 TAP2<br>PPA1 DDX58 TAP1<br>DYNLT1 TTF2 IFIH1<br>RNF213 GBP1 GBP4<br>ATP6V1F RAB32<br>TRANK1 HELZ2 MX2<br>GNA15 GBP2<br>CXCL10 B2M HLA-G<br>FCGR1A CXCL9<br>HLA-C RGS1 CD83<br>HLA-F IL6 HLA-E<br>HLA-A GNA15 KLRD1<br>MX1 DDX60 TAP2<br>PPA1 DDX58 TAP1<br>DYNLT1 TTF2 IFIH1                                                                                                                                                                                                                                                         |
| side of<br>membrane<br>hydrolase<br>activity,<br>acting on                        | GO | 14 | 479  | 2.2950<br>9E-06 | 0.00019<br>9392 |                                                                                                                                                                                                                                                                                                                                                                                                                                                                                                                                                                                        |
|                                                                                   | GO | 19 | 853  | 2.3276<br>E-06  | 0.00020<br>1267 |                                                                                                                                                                                                                                                                                                                                                                                                                                                                                                                                                                                        |

|                                                                                                      |    |    |      |                 |                 |                                                                                                                                                                                                                                                                                                                                                                                                                                                                                                                                      |
|------------------------------------------------------------------------------------------------------|----|----|------|-----------------|-----------------|--------------------------------------------------------------------------------------------------------------------------------------------------------------------------------------------------------------------------------------------------------------------------------------------------------------------------------------------------------------------------------------------------------------------------------------------------------------------------------------------------------------------------------------|
| acid anhydrides, in phosphorus-containing anhydrides                                                 |    |    |      |                 |                 | RNF213 GBP1 GBP4<br>ATP6V1F RAB32<br>TRANK1 HELZ2 MX2<br>GNA15 GBP2                                                                                                                                                                                                                                                                                                                                                                                                                                                                  |
| hydrolase activity, acting on acid anhydrides                                                        | GO | 19 | 855  | 2.4038<br>7E-06 | 0.00020<br>6596 | MX1 DDX60 TAP2<br>PPA1 DDX58 TAP1<br>DYNLT1 TTF2 IFIH1<br>RNF213 GBP1 GBP4<br>ATP6V1F RAB32<br>TRANK1 HELZ2 MX2<br>GNA15 GBP2<br>CXCL10 RTP4 B2M<br>CXCL9 HLA-C<br>TYROBP TLR3 CD58<br>CD83 VAMP5 HLA-F<br>IL6 HLA-E TNFSF4<br>HLA-A KLRD1 HCST<br>ECT2<br>SOCS1 RSAD2 PML<br>GBP1 SRGN CD58<br>IL6 LGALS9 HLA-E<br>CASP1 CLEC4E<br>TNFSF4 SYT4<br>STAT1 IFI6 MDK<br>IFIT3 LAMP3 IFI27<br>IFIT2 SP100 PML<br>BCL2A1 ZFP36<br>BIRC3 LCMT1 IDO1<br>TLR3 MELK EIF2AK2<br>PRAMEF1 IL6<br>LGALS9 CASP1<br>PSMG2 AMBRA1<br>UBD ECT2 RASSF3 |
| cell surface                                                                                         | GO | 18 | 776  | 2.4116<br>7E-06 | 0.00020<br>6596 | B2M HLA-G HLA-C<br>HLA-F HLA-E HLA-A<br>SOCS1 RSAD2 IFI27<br>DDX58 SP100 PML<br>NFKBIE GBP1 SRGN<br>TLR3 CD58 IL6<br>LGALS9 HLA-E<br>CASP1 CLEC4E<br>TNFSF4 SYT4 ECT2                                                                                                                                                                                                                                                                                                                                                                |
| regulation of protein secretion                                                                      | GO | 13 | 415  | 2.4716<br>8E-06 | 0.00021<br>0757 | HLA-G IDO1 TLR3<br>LGALS9 TNFSF4                                                                                                                                                                                                                                                                                                                                                                                                                                                                                                     |
| regulation of programmed cell death recycling endosome membrane                                      | GO | 26 | 1462 | 2.63E-<br>06    | 0.00022<br>2199 |                                                                                                                                                                                                                                                                                                                                                                                                                                                                                                                                      |
| regulation of establishment of protein localization positive regulation of interleukin-12 production | GO | 19 | 866  | 2.8651<br>3E-06 | 0.00023<br>7702 |                                                                                                                                                                                                                                                                                                                                                                                                                                                                                                                                      |
|                                                                                                      | GO | 5  | 33   | 2.8641<br>7E-06 | 0.00023<br>7702 |                                                                                                                                                                                                                                                                                                                                                                                                                                                                                                                                      |



|                                                        |           |    |      |                 |                 |                                                                                                                                                                                                                               |
|--------------------------------------------------------|-----------|----|------|-----------------|-----------------|-------------------------------------------------------------------------------------------------------------------------------------------------------------------------------------------------------------------------------|
| luminal side of membrane                               | GO        | 5  | 33   | 2.8641<br>7E-06 | 0.00023<br>7702 | HLA-G HLA-C HLA-F<br>HLA-E HLA-A<br>STAT1 IFI6 MDK<br>IFIT3 LAMP3 IFI27<br>IFIT2 SP100 PML<br>BCL2A1 ZFP36<br>BIRC3 LCMT1 IDO1<br>TLR3 MELK EIF2AK2<br>PRAMEF1 IL6<br>LGALS9 CASP1<br>PSMG2 AMBRA1<br>UBD JUNB ECT2<br>RASSF3 |
| regulation of cell death                               | GO        | 27 | 1570 | 3.1709<br>6E-06 | 0.00026<br>1895 | CXCL11 CXCL10<br>SOCS1 STAT1                                                                                                                                                                                                  |
| Regulation of toll-like receptor signaling pathway     | WikiPathw | 8  | 140  | 3.1887<br>E-06  | 0.00026<br>2185 | CXCL9 TLR3 CCL4<br>IL6                                                                                                                                                                                                        |
| Negative regulators of RIG-I/MDA5 signaling            | REACTOME  | 5  | 34   | 3.2692<br>1E-06 | 0.00026<br>761  | ISG15 HERC5<br>UBE2L6 DDX58 IFIH1<br>MX1 TAP2 TAP1<br>BCL2A1 SAMD9L                                                                                                                                                           |
| membrane fusion                                        | GO        | 9  | 190  | 3.4562<br>8E-06 | 0.00028<br>1672 | SAMD9 VAMP5 MX2<br>SYT4                                                                                                                                                                                                       |
| Toll-like Receptor Signaling Pathway                   | WikiPathw | 7  | 100  | 3.6783<br>5E-06 | 0.00029<br>8449 | CXCL11 CXCL10<br>STAT1 CXCL9 TLR3<br>CCL4 IL6                                                                                                                                                                                 |
| Proteasome Degradation                                 | WikiPathw | 6  | 64   | 3.7706<br>6E-06 | 0.00030<br>4597 | HLA-G PSMB9 HLA-C<br>HLA-F HLA-E HLA-A<br>MX1 DDX60 TAP2<br>DDX58 TAP1<br>DYNLT1 TTF2 IFIH1<br>RNF213 GBP1 GBP4<br>ATP6V1F RAB32                                                                                              |
| nucleoside-triphosphatase activity                     | GO        | 18 | 807  | 4.0398<br>4E-06 | 0.00032<br>3503 | TRANK1 HELZ2 MX2<br>GNA15 GBP2<br>DDX60 HERC5 B2M<br>DDX58 IFIT1 PML                                                                                                                                                          |
| regulation of defense response to virus                | GO        | 9  | 195  | 4.2254<br>6E-06 | 0.00033<br>1168 | BIRC3 EIF2AK2 HLA-A                                                                                                                                                                                                           |
| positive regulation of cytokine production involved in | GO        | 5  | 36   | 4.2134<br>1E-06 | 0.00033<br>1168 | B2M RSAD2 IL6<br>TNFSF4 HLA-A                                                                                                                                                                                                 |

|                                                                               |      |    |      |                 |                 |                                                                                                                                                            |
|-------------------------------------------------------------------------------|------|----|------|-----------------|-----------------|------------------------------------------------------------------------------------------------------------------------------------------------------------|
| immune response regulation of cytokine production involved in immune response | GO   | 6  | 66   | 4.4476<br>8E-06 | 0.00034<br>7107 | B2M RSAD2 TLR3<br>IL6 TNFSF4 HLA-A<br>CXCL11 CXCL10<br>IFI27 CXCL9 DDX58<br>SP100 PML ZFP36<br>NFKBIE GBP1<br>CCNE1 TLR3 TREM2                             |
| regulation of cellular localization                                           | GO   | 19 | 901  | 4.9127<br>E-06  | 0.00038<br>0863 | IL6 LGALS9 CHRNA3<br>MX2 SYT4 ECT2<br>HLA-G DDX58<br>NFKBIE HLA-C CD58                                                                                     |
| Epstein-Barr virus infection                                                  | KEGG | 9  | 199  | 4.9422<br>4E-06 | 0.00038<br>0863 | EIF2AK2 HLA-F HLA-E<br>HLA-A                                                                                                                               |
| Allograft rejection                                                           | KEGG | 5  | 38   | 5.3590<br>2E-06 | 0.00040<br>7862 | HLA-G HLA-C HLA-F<br>HLA-E HLA-A<br>FCGR1A ZFP36<br>BIRC3 IDO1 TLR3                                                                                        |
| regulation of inflammatory response                                           | GO   | 11 | 321  | 6.1334<br>8E-06 | 0.00046<br>4882 | XCL2 CCL4 IL6<br>CASP1 TNFSF4<br>CCL3L3<br>CMPK2 CXCL11<br>CXCL10 SOCS1 MDK<br>B2M CXCL9 SP100<br>ZFP36 CCNE1 IDO1<br>TREM2 EIF2AK2 IL6<br>LGALS9 CASP1    |
| response to lipid                                                             | GO   | 19 | 920  | 6.5066<br>2E-06 | 0.00049<br>1143 | TNFSF4 JUNB<br>CCL20<br>CXCL11 CXCL10                                                                                                                      |
| regulation of leukocyte chemotaxis                                            | GO   | 7  | 111  | 7.0231<br>8E-06 | 0.00052<br>5825 | CXCL9 XCL2 CCL4<br>IL6 LGALS9<br>B2M SLC15A3 HLA-G<br>FCGR1A LAMP3<br>IFI30 RNF19B PML<br>HLA-C ATP6V1F<br>UNC93B1 RAB32<br>SRGN PRTN3 TLR3<br>HLA-F HLA-E |
| vacuole negative regulation of immune effector process                        | GO   | 20 | 1011 | 7.0988<br>3E-06 | 0.00052<br>9337 | AMBRA1 HLA-A<br>DSN1                                                                                                                                       |
|                                                                               | GO   | 7  | 112  | 7.4234<br>1E-06 | 0.00055<br>1308 | TAP1 IFIT1 EIF2AK2<br>LGALS9 HLA-E<br>TNFSF4 HLA-A                                                                                                         |

|                                                                                  |    |    |      |                 |                 |                                                                                                                                                                                                                                                                                                                                                          |
|----------------------------------------------------------------------------------|----|----|------|-----------------|-----------------|----------------------------------------------------------------------------------------------------------------------------------------------------------------------------------------------------------------------------------------------------------------------------------------------------------------------------------------------------------|
| negative regulation of protein transport                                         | GO | 9  | 210  | 7.4730<br>5E-06 | 0.00055<br>2765 | RSAD2 SP100 PML<br>NFKBIE GBP1 SRGN<br>IL6 TNFSF4 SYT4                                                                                                                                                                                                                                                                                                   |
| monocyte chemotaxis                                                              | GO | 5  | 41   | 7.5193<br>9E-06 | 0.00055<br>3968 | XCL2 CCL4 IL6<br>CCL20 CCL3L3                                                                                                                                                                                                                                                                                                                            |
| negative regulation of protein secretion                                         | GO | 7  | 114  | 8.2807<br>3E-06 | 0.00060<br>7627 | RSAD2 PML GBP1<br>SRGN IL6 TNFSF4<br>SYT4                                                                                                                                                                                                                                                                                                                |
| positive regulation of T cell activation                                         | GO | 9  | 213  | 8.3301<br>8E-06 | 0.00060<br>8831 | SOCS1 HLA-G CD83<br>IL6 LGALS9 HLA-E<br>TNFSF4 HLA-A<br>TESPA1                                                                                                                                                                                                                                                                                           |
| cytokine receptor binding                                                        | GO | 10 | 272  | 8.7631<br>1E-06 | 0.00063<br>794  | CXCL11 CXCL10<br>STAT1 CXCL9 XCL2<br>CCL4 IL6 TNFSF4<br>CCL20 CCL3L3<br>CXCL10 OAS3<br>SOCS1 STAT1 IFI6<br>PLSCR1 HERC5 B2M<br>PSMB9 LAMP3 IFI27<br>DDX58 OAS1 WARS<br>IFIT1 TRIM22<br>DYNLT1 IFI16 IFIT2<br>SP100 PML ZFP36<br>BIRC3 LCMT1<br>TRIM31 CCNE1 TLR3<br>XCL2 RGS1 EIF2AK2<br>CCL4 IL6 LGALS9<br>CHRNA3 CASP1<br>PSMG2 AMBRA1<br>TNFSF4 GNA15 |
| regulation of molecular function                                                 | GO | 43 | 3257 | 8.8369<br>7E-06 | 0.00064<br>0784 | CCL20 CCL3L3<br>RGS10 ECT2<br>HERC6 B2M RSAD2<br>PSMB9 IFI16 PML<br>PRTN3 MELK TREM2<br>IL6 LGALS9 UBD                                                                                                                                                                                                                                                   |
| immune system development                                                        | GO | 15 | 618  | 8.9527<br>7E-06 | 0.00064<br>411  | CLEC4E TNFSF4<br>JUNB                                                                                                                                                                                                                                                                                                                                    |
| regulation of cysteine-type endopeptidase activity involved in apoptotic process | GO | 9  | 215  | 8.9470<br>7E-06 | 0.00064<br>411  | IFI6 LAMP3 IFI27<br>PML BIRC3 TLR3 IL6<br>LGALS9 CASP1                                                                                                                                                                                                                                                                                                   |

single-  
organism  
process

GO

135

13821

9.1463  
8E-06

0.00065  
2938

ISG15 IFITM1 OASL  
 CMPK2 HERC6  
 CXCL11 MX1 IFI35  
 CXCL10 OAS3  
 SOCS1 STAT1 RTP4  
 IFI6 PLSCR1 TAP2  
 HERC5 PPA1 MDK  
 OAS2 UBE2L6  
 TRIM69 IFIT3 B2M  
 SLC15A3 RSAD2  
 HLA-G PSMB9  
 FCGR1A LAMP3  
 IFI27 IFI30 CXCL9  
 SP110 DDX58 OAS1  
 ISG20 WARS  
 RNF19B IRF9 TDRD7  
 TAP1 CENPW NMI  
 IFIT1 TRIM22  
 DYNLT1 OR4C15  
 IFI16 IFIT2 TYMP  
 ETV7 SP100 PML  
 BCL2A1 LILRA2 TTF2  
 IFIH1 ZFP36 RPL39L  
 MSRA RNF213  
 BIRC3 NFKBIE HLA-  
 C KPNA2 NCAPG  
 SAMD9L UQCRHL  
 NT5C3A MRPS18C  
 LCMT1 GBP1 SAMD9  
 GBP4 ATP6V1F  
 TRIM31 PGP  
 UNC93B1 RAB32  
 TYROBP SRGN  
 APOL6 EGR2 CCNE1  
 PRTN3 IDO1 TLR3  
 XAF1 ORAI2 MELK  
 XCL2 RGS1 SYNGR2  
 HELZ2 CD58 CD83  
 TREM2 EIF2AK2  
 RARRES3 CCL4  
 VAMP5 HLA-F IL6  
 LGALS9 HLA-E  
 CHRNA3 MX2 CASP1  
 PSMG2 AMBRA1  
 OR2B6 UBD CLEC4E  
 TNFSF4 HLA-A  
 GNA15 JUNB  
 SPRR2A CCL20  
 CCL3L3 DSN1  
 SHISA5 KLRD1  
 RGS10 SYT4

|                                                   |      |     |       |                 |                 |                                                                                                                                                                                                                                                                                                                                                                                                                                                                                                                                                                    |
|---------------------------------------------------|------|-----|-------|-----------------|-----------------|--------------------------------------------------------------------------------------------------------------------------------------------------------------------------------------------------------------------------------------------------------------------------------------------------------------------------------------------------------------------------------------------------------------------------------------------------------------------------------------------------------------------------------------------------------------------|
| regulation of peptide secretion                   | GO   | 13  | 471   | 9.1125<br>9E-06 | 0.00065<br>2938 | SAMHD1 OR4C45<br>ZNF831 ECT2<br>OR52E8 RASSF3<br>CSH1 GBP2 SVBP<br>SOCS1 RSAD2 PML<br>GBP1 SRGN CD58<br>IL6 LGALS9 HLA-E<br>CASP1 CLEC4E<br>TNFSF4 SYT4                                                                                                                                                                                                                                                                                                                                                                                                            |
| cellular response to molecule of bacterial origin | GO   | 8   | 163   | 9.2026<br>3E-06 | 0.00065<br>3835 | CMPK2 CXCL10 B2M<br>ZFP36 TREM2 IL6<br>TNFSF4 CCL20                                                                                                                                                                                                                                                                                                                                                                                                                                                                                                                |
| mononuclear cell migration                        | GO   | 5   | 43    | 9.3009<br>5E-06 | 0.00065<br>3835 | XCL2 CCL4 IL6<br>CCL20 CCL3L3                                                                                                                                                                                                                                                                                                                                                                                                                                                                                                                                      |
| Type I diabetes mellitus                          | KEGG | 5   | 43    | 9.3009<br>5E-06 | 0.00065<br>3835 | HLA-G HLA-C HLA-F<br>HLA-E HLA-A                                                                                                                                                                                                                                                                                                                                                                                                                                                                                                                                   |
| ER to Golgi transport vesicle                     | GO   | 6   | 77    | 1.0160<br>7E-05 | 0.00071<br>1559 | B2M HLA-G HLA-C<br>HLA-F HLA-E HLA-A<br>ISG15 OASL CMPK2<br>HERC6 MX1 DDX60<br>IFI35 OAS3 SOCS1<br>STAT1 IFI44L RTP4<br>IFI6 PLSCR1 TAP2<br>HERC5 PPA1 MDK<br>OAS2 UBE2L6<br>TRIM69 IFIT3 B2M<br>SLC15A3 RSAD2<br>HLA-G PSMB9 IFI44<br>FCGR1A LAMP3<br>IFI27 IFI30 DDX58<br>OAS1 ISG20 WARS<br>RNF19B IRF9 TDRD7<br>TAP1 NMI IFIT1<br>TRIM22 DYNLT1<br>IFI16 IFIT2 TYMP<br>SP100 PML BCL2A1<br>TTF2 IFIH1 ZFP36<br>RPL39L MSRA<br>RNF213 BIRC3<br>NFKBIE HLA-C<br>KPNA2 NCAPG<br>SAMD9L UQCRHL<br>NT5C3A MRPS18C<br>LCMT1 GBP1 SAMD9<br>GBP4 ATP6V1F<br>TRIM31 PGP |
| cytoplasm                                         | GO   | 112 | 11152 | 1.0664<br>2E-05 | 0.00073<br>563  |                                                                                                                                                                                                                                                                                                                                                                                                                                                                                                                                                                    |

|                                                                                  |    |    |      |                 |                 |                                                                                                                                                                                                                                                                                                                                                                                                                                                                                                                                                                          |
|----------------------------------------------------------------------------------|----|----|------|-----------------|-----------------|--------------------------------------------------------------------------------------------------------------------------------------------------------------------------------------------------------------------------------------------------------------------------------------------------------------------------------------------------------------------------------------------------------------------------------------------------------------------------------------------------------------------------------------------------------------------------|
|                                                                                  |    |    |      |                 |                 | UNC93B1 RAB32<br>TYROBP SRGN<br>APOL6 EGR2 CCNE1<br>PRTN3 IDO1 TLR3<br>XAF1 MELK RGS1<br>SYNGR2 CD58<br>EIF2AK2 RARRES3<br>VAMP5 HLA-F IL6<br>LGALS9 HLA-E MX2<br>CASP1 PSMG2<br>AMBRA1 UBD HLA-A<br>GNA15 SPRR2A<br>DSN1 SHISA5<br>RGS10 TESPA1<br>SYT4 BOLA3 ECT2<br>RASSF3 CSH1 GBP2                                                                                                                                                                                                                                                                                  |
| regulation of<br>production<br>of molecular<br>mediator of<br>immune<br>response | GO | 7  | 120  | 1.1359<br>E-05  | 0.00077<br>1992 | B2M RSAD2 TLR3<br>IL6 HLA-E TNFSF4<br>HLA-A<br>ISG15 IFITM1<br>CXCL11 DDX60<br>CXCL10 SOCS1<br>STAT1 PLSCR1 MDK<br>B2M RSAD2 HLA-G<br>PSMB9 IFI27 CXCL9<br>DDX58 WARS<br>RNF19B NMI IFIT1<br>TRIM22 IFI16 IFIT2<br>SP100 PML BCL2A1<br>ZFP36 BIRC3<br>TRIM31 EGR2<br>CCNE1 PRTN3 IDO1<br>TLR3 MELK XCL2<br>RGS1 HELZ2 CD58<br>CD83 TREM2<br>EIF2AK2 PRAMEF1<br>CCL4 IL6 LGALS9<br>HLA-E CHRNA3<br>CASP1 AMBRA1<br>UBD CLEC4E<br>TNFSF4 HLA-A JUNB<br>CCL20 CCL3L3<br>SHISA5 RGS10<br>HCST TESPA1 SYT4<br>ECT2<br>IFI27 DDX58 SP100<br>NFKBIE TLR3 IL6<br>LGALS9 MX2 ECT2 |
| positive<br>regulation of<br>cellular<br>process                                 | GO | 63 | 5503 | 1.1914<br>8E-05 | 0.00080<br>6787 |                                                                                                                                                                                                                                                                                                                                                                                                                                                                                                                                                                          |
| regulation of<br>nucleocytop                                                     | GO | 9  | 224  | 1.2229<br>1E-05 | 0.00082<br>5039 |                                                                                                                                                                                                                                                                                                                                                                                                                                                                                                                                                                          |

|                                                                            |          |    |     |                 |                 |                                                                                                                               |
|----------------------------------------------------------------------------|----------|----|-----|-----------------|-----------------|-------------------------------------------------------------------------------------------------------------------------------|
| cytoplasmic vesicle transport                                              | GO       | 7  | 122 | 1.2574<br>2E-05 | 0.00084<br>2152 | RSAD2 PML GBP1<br>SRGN IL6 TNFSF4<br>SYT4                                                                                     |
| negative regulation of T cell differentiation                              | GO       | 7  | 122 | 1.2574<br>2E-05 | 0.00084<br>2152 | SOCS1 HLA-G CD83<br>IL6 LGALS9 TNFSF4<br>TESPA1                                                                               |
| negative regulation of establishment of protein localization               | GO       | 9  | 225 | 1.2650<br>1E-05 | 0.00084<br>4163 | RSAD2 SP100 PML<br>NFKBIE GBP1 SRGN<br>IL6 TNFSF4 SYT4<br>TAP2 B2M HLA-G<br>FCGR1A LAMP3<br>TAP1 HLA-C RAB32<br>TYROBP SYNGR2 |
| cytoplasmic vesicle membrane                                               | GO       | 16 | 719 | 1.3158<br>7E-05 | 0.00087<br>1788 | CD58 VAMP5 HLA-F<br>HLA-E HLA-A SYT4<br>CXCL11 CXCL10<br>IFI27 CXCL9 DDX58<br>SP100 PML NFKBIE                                |
| regulation of cytoplasmic transport                                        | GO       | 13 | 493 | 1.4456<br>9E-05 | 0.00095<br>0955 | TLR3 IL6 LGALS9<br>MX2 ECT2<br>CXCL11 CXCL10                                                                                  |
| cell chemotaxis                                                            | GO       | 8  | 174 | 1.4442<br>5E-05 | 0.00095<br>0955 | CXCL9 XCL2 CCL4<br>IL6 CCL20 CCL3L3<br>CXCL11 CXCL10                                                                          |
| regulation of leukocyte migration                                          | GO       | 8  | 175 | 1.5023<br>1E-05 | 0.00098<br>4678 | CXCL9 XCL2 CCL4<br>IL6 LGALS9 CCL20                                                                                           |
| positive regulation of production of molecular mediator of immune response | GO       | 6  | 83  | 1.5174<br>E-05  | 0.00098<br>6324 | B2M RSAD2 IL6 HLA-<br>E TNFSF4 HLA-A                                                                                          |
| Chemokine receptors bind chemokines                                        | REACTOME | 5  | 48  | 1.5208<br>8E-05 | 0.00098<br>6324 | CXCL11 CXCL10<br>CXCL9 XCL2 CCL20                                                                                             |
| Interleukin-10 signaling                                                   | REACTOME | 5  | 48  | 1.5208<br>8E-05 | 0.00098<br>6324 | CXCL10 CCL4 IL6<br>CCL20 CCL3L3<br>PSMB9 XCL2 CCL4                                                                            |
| response to interleukin-1                                                  | GO       | 7  | 126 | 1.5328<br>2E-05 | 0.00099<br>0575 | IL6 LGALS9 CCL20<br>CCL3L3                                                                                                    |
| positive regulation of leukocyte                                           | GO       | 9  | 231 | 1.5444<br>E-05  | 0.00099<br>4572 | SOCS1 HLA-G CD83<br>IL6 LGALS9 HLA-E                                                                                          |

|                                                                                       |    |    |      |                 |                 |                                                                                                                                                                                                        |
|---------------------------------------------------------------------------------------|----|----|------|-----------------|-----------------|--------------------------------------------------------------------------------------------------------------------------------------------------------------------------------------------------------|
| cell-cell<br>adhesion<br>transport<br>vesicle<br>membrane                             | GO | 8  | 176  | 1.5623<br>E-05  | 0.00100<br>2597 | TNFSF4 HLA-A<br>TESPA1<br>B2M HLA-G HLA-C<br>SYNGR2 HLA-F HLA-<br>E HLA-A SYT4<br>MX1 STAT1 IFI6<br>PLSCR1 TRIM69<br>IFI27 IFI16 IFIT2 PML<br>BCL2A1 BIRC3<br>SRGN TLR3 XAF1                           |
| apoptotic<br>process                                                                  | GO | 18 | 902  | 1.6865<br>4E-05 | 0.00107<br>1129 | MELK IL6 CASP1<br>SHISA5<br>OAS3 IFI6 PLSCR1<br>PSMB9 LAMP3 IFI27<br>OAS1 IFIT1 DYNLT1<br>IFI16 PML BIRC3<br>TLR3 XCL2 RGS1<br>EIF2AK2 CCL4 IL6<br>LGALS9 CASP1<br>GNA15 CCL20<br>CCL3L3 RGS10<br>ECT2 |
| regulation of<br>hydrolase<br>activity                                                | GO | 25 | 1543 | 1.7289<br>1E-05 | 0.00109<br>4266 | TAP2 B2M HLA-G<br>FCGR1A LAMP3<br>TAP1 HLA-C RAB32<br>TYROBP SYNGR2                                                                                                                                    |
| vesicle<br>membrane<br>hematopoi-<br>etic or<br>lymphoid<br>organ<br>developmen-<br>t | GO | 16 | 738  | 1.7827<br>3E-05 | 0.00112<br>1153 | CD58 VAMP5 HLA-F<br>HLA-E HLA-A SYT4                                                                                                                                                                   |
| negative<br>regulation of<br>cytokine<br>secretion                                    | GO | 14 | 579  | 1.7835<br>7E-05 | 0.00112<br>1153 | HERC6 B2M RSAD2<br>PSMB9 IFI16 PML<br>PRTN3 MELK TREM2<br>IL6 LGALS9 UBD<br>CLEC4E JUNB                                                                                                                |
| response to<br>oxygen-<br>containing<br>compound                                      | GO | 5  | 50   | 1.8256<br>4E-05 | 0.00113<br>9817 | PML GBP1 SRGN IL6<br>TNFSF4<br>CMPK2 CXCL11<br>CXCL10 SOCS1<br>STAT1 B2M PSMB9<br>CXCL9 SP100 ZFP36<br>ATP6V1F EGR2<br>CCNE1 IDO1 TREM2<br>EIF2AK2 IL6 LGALS9<br>CHRNA3 CASP1<br>TNFSF4 GNA15          |
|                                                                                       |    | 28 | 1810 | 1.9567<br>9E-05 | 0.00121<br>3473 | JUNB CCL20 RGS10<br>ECT2 CSH1 GBP2                                                                                                                                                                     |



|                                                                            |      |     |       |                 |                 |                                                                                                                                                                                                                                 |
|----------------------------------------------------------------------------|------|-----|-------|-----------------|-----------------|---------------------------------------------------------------------------------------------------------------------------------------------------------------------------------------------------------------------------------|
| regulation of<br>alpha-beta<br>T cell<br>activation                        | GO   | 6   | 87    | 1.9504<br>2E-05 | 0.00121<br>3473 | CD83 IL6 LGALS9<br>HLA-E TNFSF4 HLA-<br>A                                                                                                                                                                                       |
| positive<br>regulation of<br>I-kappaB<br>kinase/NF-<br>kappaB<br>signaling | GO   | 8   | 182   | 1.9661<br>4E-05 | 0.00121<br>5182 | TRIM22 BIRC3 TLR3<br>LGALS9 CASP1 UBD<br>SHISA5 ECT2                                                                                                                                                                            |
| regulation of<br>I-kappaB<br>kinase/NF-<br>kappaB<br>signaling             | GO   | 9   | 239   | 1.9971<br>8E-05 | 0.00123<br>0237 | STAT1 TRIM22<br>BIRC3 TLR3 LGALS9<br>CASP1 UBD SHISA5<br>ECT2                                                                                                                                                                   |
| cellular<br>response to<br>biotic<br>stimulus                              | GO   | 8   | 184   | 2.1188<br>E-05  | 0.00129<br>6478 | CMPK2 CXCL10 B2M<br>ZFP36 TREM2 IL6<br>TNFSF4 CCL20<br>CXCL11 DDX60<br>CXCL10 RSAD2<br>PSMB9 CXCL9<br>TRIM22 PML BIRC3<br>TLR3 XCL2 TREM2<br>EIF2AK2 CCL4 IL6<br>LGALS9 CASP1 UBD<br>CCL20 CCL3L3<br>SHISA5 HCST<br>TESPA1 ECT2 |
| positive<br>regulation of<br>signal<br>transduction                        | GO   | 24  | 1469  | 2.1570<br>9E-05 | 0.00131<br>3945 | SHISA5 HCST<br>TESPA1 ECT2                                                                                                                                                                                                      |
| regulation of<br>interleukin-<br>12<br>production                          | GO   | 5   | 52    | 2.1758<br>8E-05 | 0.00131<br>3945 | HLA-G IDO1 TLR3<br>LGALS9 TNFSF4                                                                                                                                                                                                |
| Autoimmun<br>e thyroid<br>disease                                          | KEGG | 5   | 52    | 2.1758<br>8E-05 | 0.00131<br>3945 | HLA-G HLA-C HLA-F<br>HLA-E HLA-A                                                                                                                                                                                                |
| positive<br>regulation of<br>leukocyte<br>chemotaxis                       | GO   | 6   | 89    | 2.2014<br>2E-05 | 0.00132<br>5028 | CXCL11 CXCL10<br>CXCL9 CCL4 IL6<br>LGALS9<br>ISG15 IFITM1 OASL<br>CMPK2 CXCL11 MX1<br>DDX60 IFI35 CXCL10<br>OAS3 SOCS1 STAT1<br>IFI44L RTP4 IFI6<br>PLSCR1 TAP2<br>HERC5 PPA1 MDK<br>OAS2 UBE2L6<br>TRIM69 IFIT3 B2M            |
| binding                                                                    | GO   | 135 | 14140 | 2.2877<br>4E-05 | 0.00135<br>0497 | RSAD2 HLA-G<br>PSMB9 FCGR1A                                                                                                                                                                                                     |

|                                                                          |                      |                    |                        |                              |                                |                                                                                                                                                                                                                                                                                                                                                                                                                                                                                                                                                                                                                                                                                                                                                                                                                                                         |
|--------------------------------------------------------------------------|----------------------|--------------------|------------------------|------------------------------|--------------------------------|---------------------------------------------------------------------------------------------------------------------------------------------------------------------------------------------------------------------------------------------------------------------------------------------------------------------------------------------------------------------------------------------------------------------------------------------------------------------------------------------------------------------------------------------------------------------------------------------------------------------------------------------------------------------------------------------------------------------------------------------------------------------------------------------------------------------------------------------------------|
|                                                                          |                      |                    |                        |                              |                                | IFI27 IFI30 CXCL9<br>SP110 DDX58<br>PARP12 OAS1 ISG20<br>WARS RNF19B IRF9<br>TDRD7 TAP1<br>CENPW NMI IFIT1<br>TRIM22 DYNLT1<br>KIR2DL3 IFI16 IFIT2<br>TYMP ETV7 SP100<br>PML BCL2A1 LILRA2<br>TTF2 IFIH1 ZFP36<br>RPL39L RNF213<br>BIRC3 NFKBIE HLA-<br>C KPNA2 NCAPG<br>SAMD9L NT5C3A<br>LCMT1 GBP1 SAMD9<br>GBP4 ZC2HC1B<br>ATP6V1F TRIM31<br>PGP UNC93B1<br>RAB32 TYROBP<br>SRGN APOL6 EGR2<br>CCNE1 LAIR2 PRTN3<br>IDO1 TLR3 TRANK1<br>XAF1 ORAI2 MELK<br>XCL2 RGS1 SYNGR2<br>HELZ2 CD58 TRIM48<br>TREM2 EIF2AK2<br>RARRES3 PRAMEF1<br>CCL4 VAMP5 HLA-F<br>ZNFX1 IL6 LGALS9<br>HLA-E CHRNA3 MX2<br>CASP1 PSMG2<br>AMBRA1 UBD<br>CLEC4E TNFSF4<br>HLA-A GNA15 JUNB<br>SPRR2A CCL20<br>CCL3L3 DSN1<br>SHISA5 KLRD1<br>RGS10 HCST<br>TESPA1 SYT4<br>SAMHD1 ZNF831<br>ECT2 RASSF3 CSH1<br>GBP2<br>TAP2 LAMP3 TAP1<br>IFIT1 DYNLT1 KPNA2<br>TLR3 EIF2AK2 |
| interaction<br>with host<br>positive<br>regulation of<br>hemopoiesi<br>s | GO<br><br><br><br>GO | 8<br><br><br><br>8 | 186<br><br><br><br>186 | 2.2812<br><br><br><br>2.2812 | 0.00135<br><br><br><br>0.00135 |                                                                                                                                                                                                                                                                                                                                                                                                                                                                                                                                                                                                                                                                                                                                                                                                                                                         |
|                                                                          |                      |                    |                        |                              |                                | ISG15 STAT1 HLA-G<br>CD83 IL6 LGALS9<br>TNFSF4 TESPA1                                                                                                                                                                                                                                                                                                                                                                                                                                                                                                                                                                                                                                                                                                                                                                                                   |

|                                                                  |      |    |      |                 |                 |                                                                                                                                                                     |
|------------------------------------------------------------------|------|----|------|-----------------|-----------------|---------------------------------------------------------------------------------------------------------------------------------------------------------------------|
| negative regulation of secretion by cell                         | GO   | 8  | 187  | 2.3663<br>1E-05 | 0.00138<br>9841 | RSAD2 PML GBP1<br>SRGN IL6 LGALS9<br>TNFSF4 SYT4                                                                                                                    |
| regulation of leukocyte mediated cytotoxicity                    | GO   | 5  | 53   | 2.3694<br>8E-05 | 0.00138<br>9841 | B2M TAP1 LGALS9<br>HLA-E HLA-A<br>TAP2 B2M HLA-G<br>FCGR1A LAMP3<br>TAP1 DYNLT1 PML<br>HLA-C RAB32<br>TYROBP SRGN<br>PRTN3 TLR3<br>SYNGR2 CD58<br>VAMP5 HLA-F HLA-E |
| cytoplasmic vesicle part                                         | GO   | 23 | 1393 | 2.6363<br>6E-05 | 0.00153<br>3997 | HLA-A DSN1 SYT4<br>CSH1<br>B2M RSAD2 IFI16<br>PRTN3 TREM2 IL6                                                                                                       |
| leukocyte differentiation                                        | GO   | 10 | 311  | 2.6402<br>3E-05 | 0.00153<br>3997 | LGALS9 UBD<br>CLEC4E JUNB<br>MX1 STAT1 IFI6<br>PLSCR1 TRIM69<br>IFI27 IFI16 IFIT2 PML<br>BCL2A1 BIRC3<br>SRGN TLR3 XAF1                                             |
| programmed cell death                                            | GO   | 19 | 1025 | 2.6923<br>E-05  | 0.00155<br>9335 | MELK IL6 CASP1<br>SPRR2A SHISA5<br>HERC6 B2M RSAD2<br>IFI16 PML PRTN3<br>MELK TREM2 IL6                                                                             |
| hemopoiesis                                                      | GO   | 13 | 525  | 2.7069<br>9E-05 | 0.00156<br>2925 | LGALS9 UBD<br>CLEC4E JUNB<br>SOCS1 HLA-G IDO1<br>CD83 IL6 LGALS9                                                                                                    |
| regulation of T cell activation                                  | GO   | 10 | 315  | 2.9292<br>3E-05 | 0.00167<br>5483 | HLA-E TNFSF4 HLA-A<br>TESPA1<br>STAT1 DDX58 IFIH1                                                                                                                   |
| Hepatitis B integral component of endoplasmic reticulum membrane | KEGG | 7  | 142  | 3.1796<br>7E-05 | 0.00180<br>7504 | EGR2 CCNE1 TLR3<br>IL6                                                                                                                                              |
| regulation of response to biotic stimulus                        | GO   | 9  | 256  | 3.3180<br>8E-05 | 0.00188<br>0379 | TAP2 HLA-G TAP1<br>HLA-C HLA-F HLA-E<br>HLA-A<br>DDX60 HERC5 B2M<br>DDX58 IFIT1 PML                                                                                 |
|                                                                  | GO   |    |      | 3.3427<br>4E-05 | 0.00188<br>8547 | BIRC3 EIF2AK2 HLA-A                                                                                                                                                 |

|                                           |      |    |      |                 |                 |                                                                                                                                                                                                                                                                                             |
|-------------------------------------------|------|----|------|-----------------|-----------------|---------------------------------------------------------------------------------------------------------------------------------------------------------------------------------------------------------------------------------------------------------------------------------------------|
|                                           |      |    |      |                 |                 | CXCL10 OAS3<br>SOCS1 IFI6 PLSCR1<br>HERC5 PSMB9<br>LAMP3 IFI27 OAS1<br>WARS IFIT1 DYNLT1<br>IFI16 PML ZFP36<br>BIRC3 LCMT1<br>CCNE1 TLR3 XCL2<br>RGS1 EIF2AK2 CCL4<br>IL6 LGALS9 CHRNA3<br>CASP1 PSMG2<br>AMBRA1 GNA15<br>CCL20 CCL3L3<br>RGS10 ECT2<br>IFI6 PSMB9 LAMP3<br>IFI27 IFI16 PML |
| regulation of catalytic activity          | GO   | 35 | 2628 | 3.4381<br>6E-05 | 0.00193<br>5709 | BIRC3 TLR3 IL6<br>LGALS9 CASP1<br>MX1 STAT1 IFIT3<br>B2M HLA-G DDX58<br>WARS TAP1 NMI<br>DYNLT1 IFI16 TYMP<br>SP100 PML BCL2A1<br>IFIH1 GBP1 TYROBP<br>TLR3 CCL4 SYT4<br>ECT2 RASSF3                                                                                                        |
| regulation of endopeptidase activity      | GO   | 11 | 390  | 3.4472<br>4E-05 | 0.00193<br>5709 | HLA-G HLA-C HLA-F<br>HLA-E HLA-A<br>SOCS1 HLA-G CD83<br>IL6 LGALS9 HLA-E<br>TNFSF4 HLA-A<br>TESPA1                                                                                                                                                                                          |
| identical protein binding                 | GO   | 23 | 1426 | 3.6993<br>4E-05 | 0.00207<br>0955 | PSMB9 XCL2 CCL4<br>IL6 CCL20 CCL3L3<br>TAP2 B2M SLC15A3<br>RSAD2 HLA-G<br>FCGR1A LAMP3<br>IFI27 TAP1 PML<br>BCL2A1 HLA-C GBP1<br>GBP4 ATP6V1F<br>UNC93B1 RAB32<br>TYROBP SRGN TLR3<br>SYNGR2 CD58 HLA-F<br>HLA-E AMBRA1<br>HLA-A SYT4 GBP2                                                  |
| Viral myocarditis                         | KEGG | 5  | 59   | 3.8282<br>6E-05 | 0.00213<br>6631 | TAP2 HLA-G TAP1<br>HLA-C HLA-F HLA-E<br>HLA-A                                                                                                                                                                                                                                               |
| positive regulation of cell-cell adhesion | GO   | 9  | 261  | 3.8605<br>3E-05 | 0.00214<br>8133 |                                                                                                                                                                                                                                                                                             |
| cellular response to interleukin-1        | GO   | 6  | 99   | 3.8751<br>1E-05 | 0.00214<br>975  |                                                                                                                                                                                                                                                                                             |
| bounding membrane of organelle            | GO   | 28 | 1926 | 4.1001<br>3E-05 | 0.00224<br>377  |                                                                                                                                                                                                                                                                                             |
| intrinsic component of endoplasmic        | GO   | 7  | 148  | 4.0863<br>9E-05 | 0.00224<br>377  |                                                                                                                                                                                                                                                                                             |

|                                                     |           |    |      |                 |                 |                                                                                                                                                                                                                             |
|-----------------------------------------------------|-----------|----|------|-----------------|-----------------|-----------------------------------------------------------------------------------------------------------------------------------------------------------------------------------------------------------------------------|
| c reticulum membrane vesicle fusion                 | GO        | 6  | 100  | 4.0868<br>8E-05 | 0.00224<br>377  | TAP2 TAP1 SAMD9L<br>SAMD9 VAMP5 SYT4<br>CXCL11 CXCL10<br>RTP4 CXCL9 XCL2                                                                                                                                                    |
| G-protein coupled receptor binding                  | GO        | 9  | 264  | 4.2025<br>1E-05 | 0.00228<br>9997 | CCL4 GNA15 CCL20<br>CCL3L3<br>TAP2 TAP1 BCL2A1                                                                                                                                                                              |
| organelle fusion                                    | GO        | 7  | 149  | 4.2562<br>7E-05 | 0.00231<br>2446 | SAMD9L SAMD9<br>VAMP5 SYT4<br>CXCL11 CXCL10<br>CXCL9 XCL2 CCL4                                                                                                                                                              |
| Cytokine-cytokine receptor interaction              | KEGG      | 9  | 265  | 4.3220<br>4E-05 | 0.00233<br>4408 | IL6 TNFSF4 CCL20<br>CCL3L3<br>MX1 STAT1 IFI6<br>PLSCR1 TRIM69<br>IFI27 IFI16 IFIT2 PML<br>BCL2A1 BIRC3<br>SRGN TLR3 XAF1                                                                                                    |
| cell death regulation of lymphocyte differentiation | GO        | 19 | 1066 | 4.4391<br>1E-05 | 0.00235<br>8454 | MELK IL6 CASP1<br>SPRR2A SHISA5                                                                                                                                                                                             |
| regulation of interleukin-1 production              | GO        | 7  | 150  | 4.4318<br>9E-05 | 0.00235<br>8454 | SOCS1 HLA-G CD83<br>IL6 LGALS9 TNFSF4<br>TESPA1                                                                                                                                                                             |
| Cytosolic DNA-sensing pathway                       | KEGG      | 5  | 61   | 4.4433<br>9E-05 | 0.00235<br>8454 | IFI16 PML LGALS9<br>CASP1 CCL20                                                                                                                                                                                             |
| IL12-mediated signaling events                      | Pathway I | 5  | 61   | 4.4433<br>9E-05 | 0.00235<br>8454 | CXCL10 DDX58<br>CCL4 IL6 CASP1                                                                                                                                                                                              |
| protein modification by small protein conjugation   | GO        | 16 | 803  | 4.6765<br>6E-05 | 0.00246<br>0938 | SOCS1 STAT1 B2M<br>CCL4 HLA-A<br>HERC6 SOCS1<br>HERC5 UBE2L6<br>TRIM69 PSMB9<br>RNF19B TRIM22<br>SP100 PML IFIH1<br>RNF213 BIRC3<br>TRIM31 EGR2 UBD<br>SOCS1 STAT1<br>PSMB9 DDX58 IFIT1<br>ATP6V1F EGR2<br>CCNE1 TLR3 TREM2 |
| response to nitrogen compound                       | GO        | 20 | 1165 | 4.7809<br>8E-05 | 0.00250<br>8723 | EIF2AK2 IL6<br>CHRNA3 CASP1                                                                                                                                                                                                 |

|                                                           |    |    |      |                 |                 |                                                                                                                                                |
|-----------------------------------------------------------|----|----|------|-----------------|-----------------|------------------------------------------------------------------------------------------------------------------------------------------------|
|                                                           |    |    |      |                 |                 | UBD TNFSF4 GNA15<br>JUNB RGS10 CSH1                                                                                                            |
| intracellular<br>transport of<br>virus                    | GO | 5  | 63   | 5.1322<br>2E-05 | 0.00268<br>5373 | TAP2 TAP1 IFIT1<br>DYNLT1 KPNA2                                                                                                                |
| regulation of<br>leukocyte<br>cell-cell<br>adhesion       | GO | 10 | 338  | 5.1710<br>2E-05 | 0.00269<br>0391 | SOCS1 HLA-G IDO1<br>CD83 IL6 LGALS9<br>HLA-E TNFSF4 HLA-<br>A TESPA1                                                                           |
| multi-<br>organism<br>cellular<br>localization            | GO | 5  | 64   | 5.5061<br>E-05  | 0.00284<br>0653 | TAP2 TAP1 IFIT1<br>DYNLT1 KPNA2                                                                                                                |
| multi-<br>organism<br>intracellular<br>transport          | GO | 5  | 64   | 5.5061<br>E-05  | 0.00284<br>0653 | TAP2 TAP1 IFIT1<br>DYNLT1 KPNA2                                                                                                                |
| negative<br>regulation of<br>secretion                    | GO | 8  | 212  | 5.5354<br>E-05  | 0.00284<br>7792 | RSAD2 PML GBP1<br>SRGN IL6 LGALS9<br>TNFSF4 SYT4                                                                                               |
| single-<br>organism<br>membrane<br>fusion                 | GO | 7  | 156  | 5.6145<br>7E-05 | 0.00287<br>2479 | TAP2 TAP1 BCL2A1<br>SAMD9L SAMD9<br>VAMP5 SYT4                                                                                                 |
| positive<br>regulation of<br>leukocyte<br>differentiation | GO | 7  | 156  | 5.6145<br>7E-05 | 0.00287<br>2479 | SOCS1 HLA-G CD83<br>IL6 LGALS9 TNFSF4<br>TESPA1                                                                                                |
| cellular<br>response to<br>lipopolysac-<br>charide        | GO | 7  | 157  | 5.8346<br>5E-05 | 0.00296<br>8577 | CMPK2 CXCL10 B2M<br>ZFP36 IL6 TNFSF4<br>CCL20                                                                                                  |
| regulation of<br>leukocyte<br>differentiation             | GO | 9  | 277  | 5.9949<br>6E-05 | 0.00304<br>1741 | SOCS1 HLA-G<br>TYROBP TLR3 CD83<br>IL6 LGALS9 TNFSF4<br>TESPA1                                                                                 |
| regulation of<br>T cell<br>proliferation                  | GO | 7  | 158  | 6.0617<br>1E-05 | 0.00306<br>7158 | HLA-G IDO1 IL6<br>LGALS9 HLA-E<br>TNFSF4 HLA-A<br>IFI6 PSMB9 LAMP3                                                                             |
| regulation of<br>peptidase<br>activity                    | GO | 11 | 417  | 6.1420<br>5E-05 | 0.00309<br>9294 | IFI27 IFI16 PML<br>BIRC3 TLR3 IL6<br>LGALS9 CASP1<br>IFITM1 CXCL11<br>CXCL10 SOCS1 B2M<br>RSAD2 IFI27 CXCL9<br>DDX58 TRIM22<br>SP100 PML ZFP36 |
| regulation of<br>localization                             | GO | 35 | 2681 | 6.1679<br>3E-05 | 0.00310<br>3851 | NFKBIE GBP1 SRGN<br>CCNE1 PRTN3 TLR3                                                                                                           |

|                                    |    |     |       |                 |                 |                                                                                                                                                                                                                                                                    |
|------------------------------------|----|-----|-------|-----------------|-----------------|--------------------------------------------------------------------------------------------------------------------------------------------------------------------------------------------------------------------------------------------------------------------|
| transport of virus                 | GO | 5   | 66    | 6.3166<br>1E-05 | 0.00317<br>0011 | XCL2 CD58 TREM2<br>CCL4 IL6 LGALS9<br>HLA-E CHRNA3 MX2<br>CASP1 CLEC4E<br>TNFSF4 CCL20 SYT4<br>ECT2 SVBP<br>TAP2 TAP1 IFIT1<br>DYNLT1 KPNA2<br>B2M SLC15A3 HLA-G<br>FCGR1A LAMP3<br>IFI30 PML HLA-C<br>ATP6V1F RAB32                                               |
| vacuolar part                      | GO | 16  | 828   | 6.5903<br>6E-05 | 0.00329<br>8403 | PRTN3 TLR3 HLA-F<br>HLA-E HLA-A DSN1<br>ISG15 IFITM1<br>CXCL10 STAT1 B2M<br>HLA-G CXCL9<br>DYNLT1 PML ZFP36<br>GBP1 TYROBP<br>CCNE1 TLR3 CD83<br>EIF2AK2 PRAMEF1<br>IL6 LGALS9 CHRNA3                                                                              |
| regulation of cell differentiation | GO | 25  | 1645  | 6.6535<br>8E-05 | 0.00332<br>102  | TNFSF4 JUNB<br>TESPA1 SYT4 ECT2<br>IFITM1 STAT1 HLA-G<br>FCGR1A SP110<br>KIR2DL3 OR4C15<br>LILRA2 HLA-C<br>TYROBP LAIR2 TLR3<br>RGS1 TREM2 CCL4<br>HLA-F LGALS9 HLA-E<br>CHRNA3 OR2B6<br>KIR2DL2 CLEC4E<br>HLA-A GNA15<br>SHISA5 KLRD1                             |
| molecular transducer activity      | GO | 30  | 2192  | 6.8292<br>9E-05 | 0.00339<br>0349 | RGS10 OR4C45<br>ECT2 OR52E8<br>ISG15 IFITM1 OASL<br>CMPK2 HERC6<br>CXCL11 MX1 DDX60<br>IFI35 CXCL10 OAS3<br>SOCS1 STAT1 IFI44L<br>RTP4 IFI6 PLSCR1<br>TAP2 HERC5 PPA1<br>MDK OAS2 UBE2L6<br>TRIM69 IFIT3 B2M<br>SLC15A3 RSAD2<br>HLA-G PSMB9 IFI44<br>FCGR1A LAMP3 |
| cellular process                   | GO | 139 | 15083 | 6.9269<br>2E-05 | 0.00342<br>9572 | IFI27 IFI30 CXCL9<br>SP110 DDX58 OAS1                                                                                                                                                                                                                              |





|                                           |    |    |      |                 |                 |                                                                                                                                                                                                                                |
|-------------------------------------------|----|----|------|-----------------|-----------------|--------------------------------------------------------------------------------------------------------------------------------------------------------------------------------------------------------------------------------|
| activation of innate immune response      | GO | 9  | 285  | 7.3886<br>3E-05 | 0.00360<br>9652 | MX2 GNA15<br>SAMHD1 GBP2<br>PSMB9 DDX58 IFI16<br>IFIH1 BIRC3<br>UNC93B1 TLR3<br>LGALS9 CLEC4E<br>B2M HLA-G FCGR1A<br>LAMP3 PML HLA-C<br>SAMD9L SAMD9<br>UNC93B1 RAB32                                                          |
| endosome                                  | GO | 16 | 837  | 7.4306<br>8E-05 | 0.00362<br>0588 | TLR3 VAMP5 HLA-F<br>HLA-E HLA-A CSH1<br>IFITM1 STAT1 IFIT3<br>HLA-G IFI30 WARS<br>PML IDO1 EIF2AK2<br>RARRES3 IL6                                                                                                              |
| negative regulation of cell proliferation | GO | 14 | 670  | 8.0500<br>5E-05 | 0.00391<br>2027 | LGALS9 AMBRA1<br>CCL3L3                                                                                                                                                                                                        |
| multi-organism transport                  | GO | 5  | 70   | 8.2108<br>7E-05 | 0.00396<br>9232 | TAP2 TAP1 IFIT1<br>DYNLT1 KPNA2                                                                                                                                                                                                |
| multi-organism localization               | GO | 5  | 70   | 8.2108<br>7E-05 | 0.00396<br>9232 | TAP2 TAP1 IFIT1<br>DYNLT1 KPNA2<br>MX1 TAP2 TAP1<br>TYMP TTF2 RNF213                                                                                                                                                           |
| nucleoside catabolic process              | GO | 14 | 672  | 8.2956<br>E-05  | 0.00399<br>9694 | NT5C3A GBP1 GBP4<br>ATP6V1F RAB32<br>MX2 GNA15 GBP2<br>B2M HLA-G FCGR1A                                                                                                                                                        |
| coated vesicle membrane defense           | GO | 7  | 167  | 8.4485<br>6E-05 | 0.00404<br>1705 | HLA-C HLA-F HLA-E<br>HLA-A<br>ISG15 B2M TLR3 IL6                                                                                                                                                                               |
| response to bacterium                     | GO | 8  | 226  | 8.4891<br>6E-05 | 0.00405<br>0606 | HLA-E CLEC4E HLA-A<br>CCL20<br>IFI6 IFI27 IFI16 PML                                                                                                                                                                            |
| apoptotic signaling pathway               | GO | 9  | 292  | 8.8218<br>6E-05 | 0.00419<br>8477 | BCL2A1 SRGN TLR3<br>MELK SHISA5<br>CXCL11 DDX60<br>CXCL10 SOCS1<br>STAT1 IFI6 PLSCR1<br>RSAD2 PSMB9<br>CXCL9 TRIM22<br>DYNLT1 TYMP<br>SP100 PML BCL2A1<br>RNF213 BIRC3 GBP1<br>EGR2 TLR3 XCL2<br>RGS1 TREM2<br>EIF2AK2 PRAMEF1 |
| regulation of cell communication          | GO | 41 | 3393 | 8.9346<br>5E-05 | 0.00424<br>1196 | CCL4 IL6 LGALS9<br>CHRNA3 CASP1                                                                                                                                                                                                |

|                                                 |          |    |      |                 |                 |                                                                                                                                                                    |
|-------------------------------------------------|----------|----|------|-----------------|-----------------|--------------------------------------------------------------------------------------------------------------------------------------------------------------------|
|                                                 |          |    |      |                 |                 | AMBRA1 UBD CCL20<br>CCL3L3 SHISA5<br>RGS10 HCST<br>TESPA1 SYT4 ECT2                                                                                                |
| positive regulation of interleukin-6 production | GO       | 5  | 72   | 9.3078<br>3E-05 | 0.00440<br>6981 | DDX58 TLR3 IL6<br>LGALS9 TNFSF4<br>CXCL10 SOCS1<br>STAT1 PSMB9<br>PRTN3 CCL4 IL6                                                                                   |
| Signaling by Interleukins                       | REACTOME | 12 | 516  | 9.4024<br>1E-05 | 0.00444<br>0347 | LGALS9 CASP1<br>JUNB CCL20 CCL3L3<br>MX1 TAP2 OAS2<br>ISG20 TAP1 TYMP<br>TTF2 ZFP36 RNF213<br>NT5C3A GBP1 GBP4<br>ATP6V1F RAB32                                    |
| cellular nitrogen compound catabolic process    | GO       | 19 | 1134 | 9.5946<br>E-05  | 0.00451<br>9525 | IDO1 MX2 GNA15<br>SAMHD1 GBP2<br>MX1 TAP2 TAP1<br>TYMP TTF2 RNF213<br>NT5C3A GBP1 GBP4<br>ATP6V1F RAB32                                                            |
| glycosyl compound catabolic process             | GO       | 14 | 682  | 9.6232<br>E-05  | 0.00452<br>1431 | MX2 GNA15 GBP2<br>OASL DDX60 OAS3<br>HERC5 OAS2 IFIT3<br>DDX58 PARP12<br>OAS1 ISG20 TDRD7<br>IFIT1 IFI16 IFIT2<br>IFIH1 ZFP36 RPL39L<br>KPNA2 TLR3 HELZ2           |
| RNA binding organelle membrane fusion           | GO       | 24 | 1583 | 9.7279<br>6E-05 | 0.00454<br>7452 | EIF2AK2 ZNFX1 HLA-A SAMHD1                                                                                                                                         |
|                                                 | GO       | 6  | 118  | 9.7679<br>2E-05 | 0.00455<br>457  | TAP2 TAP1 SAMD9L<br>SAMD9 VAMP5 SYT4<br>IFITM1 CXCL11<br>CXCL10 STAT1 IFIT3<br>HLA-G IFI30 CXCL9<br>WARS PML ZFP36<br>PRTN3 IDO1<br>EIF2AK2 RARRES3<br>PRAMEF1 IL6 |
| regulation of cell proliferation                | GO       | 24 | 1588 | 9.9312<br>5E-05 | 0.00460<br>7399 | LGALS9 HLA-E<br>AMBRA1 TNFSF4<br>HLA-A JUNB CCL3L3<br>MX1 TAP2 OAS2<br>ISG20 TAP1 TYMP                                                                             |
| heterocycle catabolic process                   | GO       | 19 | 1137 | 9.9108<br>9E-05 | 0.00460<br>7399 | TTF2 ZFP36 RNF213<br>NT5C3A GBP1 GBP4                                                                                                                              |

|                                                                                                             |    |    |      |                 |                 |                                                                                                                             |
|-------------------------------------------------------------------------------------------------------------|----|----|------|-----------------|-----------------|-----------------------------------------------------------------------------------------------------------------------------|
|                                                                                                             |    |    |      |                 |                 | ATP6V1F RAB32<br>IDO1 MX2 GNA15<br>SAMHD1 GBP2<br>MX1 TAP2 OAS2<br>ISG20 TAP1 TYMP<br>TTF2 ZFP36 RNF213<br>NT5C3A GBP1 GBP4 |
| aromatic<br>compound<br>catabolic<br>process                                                                | GO | 19 | 1140 | 0.0001<br>02363 | 0.00471<br>6269 | ATP6V1F RAB32<br>IDO1 MX2 GNA15<br>SAMHD1 GBP2                                                                              |
| positive<br>regulation of<br>lymphocyte<br>activation                                                       | GO | 9  | 298  | 0.0001<br>0229  | 0.00471<br>6269 | SOCS1 HLA-G CD83<br>IL6 LGALS9 HLA-E<br>TNFSF4 HLA-A<br>TESPA1<br>IFI27 IFIT2 PML                                           |
| positive<br>regulation of<br>apoptotic<br>process                                                           | GO | 13 | 604  | 0.0001<br>05395 | 0.00482<br>8749 | BCL2A1 IDO1 TLR3<br>MELK EIF2AK2 IL6<br>LGALS9 CASP1 UBD<br>ECT2<br>SOCS1 RSAD2 PML<br>GBP1 SRGN CD58<br>IL6 LGALS9 HLA-E   |
| regulation of<br>secretion by<br>cell                                                                       | GO | 14 | 693  | 0.0001<br>12923 | 0.00512<br>2706 | CHRNA3 CASP1<br>CLEC4E TNFSF4<br>SYT4<br>IFI27 IFIT2 PML                                                                    |
| positive<br>regulation of<br>programme<br>d cell death                                                      | GO | 13 | 610  | 0.0001<br>15745 | 0.00523<br>7828 | BCL2A1 IDO1 TLR3<br>MELK EIF2AK2 IL6<br>LGALS9 CASP1 UBD<br>ECT2                                                            |
| positive<br>regulation of<br>sequence-<br>specific<br>DNA<br>binding<br>transcription<br>factor<br>activity | GO | 8  | 237  | 0.0001<br>16341 | 0.00525<br>1899 | DDX58 TRIM22<br>SP100 TRIM31 TLR3<br>EIF2AK2 IL6 LGALS9                                                                     |
| pattern<br>recognition<br>receptor<br>signaling<br>pathway                                                  | GO | 6  | 123  | 0.0001<br>21326 | 0.00543<br>6937 | DDX58 IFIH1 BIRC3<br>UNC93B1 TLR3<br>LGALS9<br>CMPK2 MX1 TAP2<br>OAS2 OAS1 TAP1<br>TYMP TTF2 RNF213                         |
| nucleoside<br>phosphate<br>metabolic<br>process                                                             | GO | 19 | 1157 | 0.0001<br>22637 | 0.00548<br>235  | UQCRHL NT5C3A<br>GBP1 GBP4<br>ATP6V1F RAB32                                                                                 |

|                                                                                 |      |    |      |                 |                 |                                                                                                                                                                                                                                                                       |
|---------------------------------------------------------------------------------|------|----|------|-----------------|-----------------|-----------------------------------------------------------------------------------------------------------------------------------------------------------------------------------------------------------------------------------------------------------------------|
| endosomal part                                                                  | GO   | 11 | 454  | 0.0001<br>26209 | 0.00561<br>4777 | MX2 GNA15<br>SAMHD1 GBP2<br>B2M HLA-G FCGR1A<br>PML HLA-C RAB32<br>TLR3 HLA-F HLA-E<br>HLA-A CSH1<br>OASL CMPK2<br>CXCL11 MX1 DDX60<br>CXCL10 OAS3 IFI44L<br>TAP2 MDK OAS2<br>B2M DDX58 OAS1<br>WARS TAP1 TTF2<br>IFIH1 GBP1 GBP4<br>RAB32 TRANK1<br>MELK HELZ2 TREM2 |
| carbohydrate derivative binding                                                 | GO   | 30 | 2239 | 0.0001<br>32094 | 0.00582<br>0351 | EIF2AK2 MX2 GNA15<br>SAMHD1 GBP2<br>CXCL11 CXCL10                                                                                                                                                                                                                     |
| Chemokine signaling pathway                                                     | KEGG | 7  | 180  | 0.0001<br>31954 | 0.00582<br>0351 | STAT1 CXCL9 CCL4<br>CCL20 CCL3L3<br>CMPK2 CXCL10<br>SOCS1 STAT1 B2M<br>PSMB9 ZFP36<br>ATP6V1F EGR2<br>TREM2 IL6 CHRNA3<br>TNFSF4 GNA15                                                                                                                                |
| cellular response to oxygen-containing compound                                 | GO   | 19 | 1169 | 0.0001<br>38991 | 0.00609<br>9507 | CCL20 RGS10 ECT2<br>CSH1 GBP2<br>CXCL11 CXCL10<br>IFI27 CXCL9 DDX58<br>SP100 PML NFKBIE                                                                                                                                                                               |
| regulation of intracellular transport intrinsic component of organelle membrane | GO   | 13 | 622  | 0.0001<br>39092 | 0.00609<br>9507 | TLR3 IL6 LGALS9<br>MX2 ECT2                                                                                                                                                                                                                                           |
| leukocyte migration                                                             | GO   | 9  | 312  | 0.0001<br>42553 | 0.00622<br>1659 | TAP2 HLA-G TAP1<br>HLA-C VAMP5 HLA-F<br>HLA-E HLA-A SYT4<br>CXCL11 CXCL10<br>CXCL9 XCL2 CD58                                                                                                                                                                          |
| nucleobase-containing compound catabolic process                                | GO   | 18 | 1083 | 0.0001<br>54852 | 0.00622<br>1659 | CCL4 IL6 CCL20<br>CCL3L3<br>MX1 TAP2 OAS2<br>ISG20 TAP1 TYMP<br>TTF2 ZFP36 RNF213<br>NT5C3A GBP1 GBP4<br>ATP6V1F RAB32                                                                                                                                                |
| regulation of signal transduction                                               | GO   | 35 | 2825 | 0.0001<br>55601 | 0.00672<br>6559 | MX2 GNA15<br>SAMHD1 GBP2<br>CXCL11 DDX60                                                                                                                                                                                                                              |
|                                                                                 | GO   |    |      | 0.0001<br>55601 | 0.00672<br>8573 | CXCL10 SOCS1<br>STAT1 IFI6 PLSCR1                                                                                                                                                                                                                                     |

|                                                                             |              |    |      |                 |                 |                                                                                                                                                                                                                                                                                                                                                                                                                                                                                                                                    |
|-----------------------------------------------------------------------------|--------------|----|------|-----------------|-----------------|------------------------------------------------------------------------------------------------------------------------------------------------------------------------------------------------------------------------------------------------------------------------------------------------------------------------------------------------------------------------------------------------------------------------------------------------------------------------------------------------------------------------------------|
|                                                                             |              |    |      |                 |                 | RSAD2 PSMB9<br>CXCL9 TRIM22<br>DYNLT1 SP100 PML<br>RNF213 BIRC3 GBP1<br>TLR3 XCL2 RGS1<br>TREM2 EIF2AK2<br>PRAMEF1 CCL4 IL6<br>LGALS9 CASP1 UBD<br>CCL20 CCL3L3<br>SHISA5 RGS10<br>HCST TESPA1 ECT2<br>MX1 TAP2 OAS2<br>ISG20 TAP1 TYMP<br>TTF2 ZFP36 RNF213<br>NT5C3A GBP1 GBP4<br>ATP6V1F RAB32                                                                                                                                                                                                                                  |
| organic<br>cyclic<br>compound<br>catabolic<br>process                       | GO           | 19 | 1180 | 0.0001<br>55629 | 0.00672<br>8573 | IDO1 MX2 GNA15<br>SAMHD1 GBP2                                                                                                                                                                                                                                                                                                                                                                                                                                                                                                      |
| RIG-I/MDA5<br>mediated<br>induction of<br>IFN-<br>alpha/beta<br>pathways    | REACTO<br>ME | 5  | 81   | 0.0001<br>56998 | 0.00677<br>1854 | ISG15 HERC5<br>UBE2L6 DDX58 IFIH1<br>CXCL11 DDX60<br>CXCL10 SOCS1<br>STAT1 IFI6 PLSCR1<br>RSAD2 PSMB9<br>CXCL9 TRIM22<br>DYNLT1 TYMP<br>SP100 PML RNF213<br>BIRC3 GBP1 EGR2<br>TLR3 XCL2 RGS1<br>TREM2 EIF2AK2<br>PRAMEF1 CCL4 IL6<br>LGALS9 CHRNA3<br>CASP1 UBD CCL20<br>CCL3L3 SHISA5<br>RGS10 HCST<br>TESPA1 SYT4 ECT2<br>HERC6 SOCS1<br>HERC5 UBE2L6<br>TRIM69 PSMB9<br>DDX58 RNF19B<br>TRIM22 SP100 PML<br>IFIH1 RNF213 BIRC3<br>TRIM31 EGR2 UBD<br>CXCL11 CXCL10<br>SOCS1 B2M RSAD2<br>IFI27 CXCL9 DDX58<br>SP100 PML NFKBIE |
| regulation of<br>signaling                                                  | GO           | 39 | 3254 | 0.0001<br>64512 | 0.00707<br>9382 |                                                                                                                                                                                                                                                                                                                                                                                                                                                                                                                                    |
| protein<br>modification<br>by small<br>protein<br>conjugation<br>or removal | GO           | 17 | 996  | 0.0001<br>6916  | 0.00726<br>2465 |                                                                                                                                                                                                                                                                                                                                                                                                                                                                                                                                    |
| regulation of<br>transport                                                  | GO           | 27 | 1984 | 0.0001<br>69951 | 0.00727<br>9427 |                                                                                                                                                                                                                                                                                                                                                                                                                                                                                                                                    |

|                                                  |      |    |      |                 |                 |                                                                                                                                                                                                                                                                                |
|--------------------------------------------------|------|----|------|-----------------|-----------------|--------------------------------------------------------------------------------------------------------------------------------------------------------------------------------------------------------------------------------------------------------------------------------|
|                                                  |      |    |      |                 |                 | GBP1 SRGN PRTN3<br>TLR3 CD58 CCL4 IL6<br>LGALS9 HLA-E<br>CHRNA3 MX2 CASP1<br>CLEC4E TNFSF4<br>SYT4 ECT2<br>SOCS1 STAT1 IFI6<br>HLA-G PSMB9 TAP1<br>NMI IFIT1 IFI16<br>BCL2A1 ZFP36<br>RNF213 GBP1 TLR3<br>RGS1 EIF2AK2<br>PRAMEF1 IL6<br>LGALS9 HLA-E<br>TNFSF4 HLA-A<br>RGS10 |
| negative regulation of response to stimulus      | GO   | 23 | 1561 | 0.0001<br>71054 | 0.00730<br>9664 |                                                                                                                                                                                                                                                                                |
| positive regulation of ERK1 and ERK2 cascade     | GO   | 7  | 189  | 0.0001<br>75982 | 0.00746<br>8307 | XCL2 TREM2 CCL4<br>IL6 LGALS9 CCL20<br>CCL3L3<br>MX1 TAP2 TAP1<br>TYMP TTF2 RNF213<br>NT5C3A GBP1 GBP4<br>ATP6V1F RAB32                                                                                                                                                        |
| carbohydrate derivative catabolic process        | GO   | 15 | 815  | 0.0001<br>7768  | 0.00752<br>3019 | MX2 GNA15<br>SAMHD1 GBP2<br>MX1 TAP2 TAP1<br>TTF2 RNF213 GBP1<br>GBP4 ATP6V1F                                                                                                                                                                                                  |
| purine nucleoside triphosphate catabolic process | GO   | 13 | 640  | 0.0001<br>81643 | 0.00763<br>8148 | RAB32 MX2 GNA15<br>SAMHD1 GBP2<br>HLA-G ZFP36 HLA-C                                                                                                                                                                                                                            |
| HTLV-I infection                                 | KEGG | 8  | 255  | 0.0001<br>88143 | 0.00787<br>5479 | EGR2 HLA-F IL6<br>HLA-E HLA-A<br>CXCL11 CXCL10                                                                                                                                                                                                                                 |
| positive regulation of chemotaxis                | GO   | 6  | 134  | 0.0001<br>89319 | 0.00790<br>6754 | CXCL9 CCL4 IL6<br>LGALS9<br>MX1 TAP2 TAP1<br>TTF2 RNF213 GBP1<br>GBP4 ATP6V1F                                                                                                                                                                                                  |
| nucleoside triphosphate catabolic process        | GO   | 13 | 645  | 0.0001<br>95274 | 0.00811<br>8625 | RAB32 MX2 GNA15<br>SAMHD1 GBP2<br>IFI27 IFIT2 PML<br>BCL2A1 IDO1 TLR3<br>MELK EIF2AK2 IL6                                                                                                                                                                                      |
| positive regulation of cell death                | GO   | 13 | 649  | 0.0002<br>06798 | 0.00855<br>9128 | LGALS9 CASP1 UBD<br>ECT2                                                                                                                                                                                                                                                       |
| positive regulation of                           | GO   | 9  | 329  | 0.0002<br>08387 | 0.00858<br>6306 | SOCS1 HLA-G CD83<br>IL6 LGALS9 HLA-E                                                                                                                                                                                                                                           |

|                                                          |    |    |       |                 |                 |                                                                                                                                                                                                                                                                                                                                                                                                                                                                                                                                                                                                                                                                                                                                                                                                                                                                                                                  |
|----------------------------------------------------------|----|----|-------|-----------------|-----------------|------------------------------------------------------------------------------------------------------------------------------------------------------------------------------------------------------------------------------------------------------------------------------------------------------------------------------------------------------------------------------------------------------------------------------------------------------------------------------------------------------------------------------------------------------------------------------------------------------------------------------------------------------------------------------------------------------------------------------------------------------------------------------------------------------------------------------------------------------------------------------------------------------------------|
| leukocyte activation regulation of ERK1 and ERK2 cascade | GO | 8  | 259   | 0.0002<br>08224 | 0.00858<br>6306 | TNFSF4 HLA-A<br>TESPA1<br><br>GBP1 XCL2 TREM2<br>CCL4 IL6 LGALS9<br>CCL20 CCL3L3<br>HERC6 HERC5<br>TRIM69 WARS<br>RNF19B TRIM22<br>RNF213 BIRC3<br>TRIM31 EGR2<br>CXCL11 DDX60<br>CXCL10 RSAD2<br>PSMB9 CXCL9<br>TRIM22 PML BIRC3<br>TLR3 XCL2 TREM2<br>EIF2AK2 CCL4 IL6<br>LGALS9 CASP1 UBD<br>CCL20 CCL3L3<br>SHISA5 HCST<br>TESPA1 ECT2<br>ISG15 OASL CMPK2<br>HERC6 MX1 IFI35<br>OAS3 SOCS1 STAT1<br>IFI44L IFI6 PLSCR1<br>TAP2 HERC5 OAS2<br>UBE2L6 TRIM69<br>IFIT3 B2M SLC15A3<br>RSAD2 HLA-G<br>PSMB9 FCGR1A<br>LAMP3 IFI27 IFI30<br>SP110 PARP12<br>OAS1 ISG20 WARS<br>RNF19B IRF9 TDRD7<br>TAP1 CENPW NMI<br>TRIM22 DYNLT1<br>IFI16 IFIT2 ETV7<br>SP100 PML BCL2A1<br>TTF2 IFIH1 ZFP36<br>MSRA RNF213<br>BIRC3 NFKBIE HLA-C<br>KPNA2 NCAPG<br>UQCRHL NT5C3A<br>MRPS18C GBP1<br>SAMD9 GBP4<br>ATP6V1F TRIM31<br>UNC93B1 RAB32<br>SRGN EGR2 CCNE1<br>PRTN3 TLR3 XAF1<br>MELK HELZ2 TREM2<br>EIF2AK2 VAMP5 |
| ligase activity                                          | GO | 10 | 406   | 0.0002<br>18038 | 0.00894<br>3909 |                                                                                                                                                                                                                                                                                                                                                                                                                                                                                                                                                                                                                                                                                                                                                                                                                                                                                                                  |
| positive regulation of signaling                         | GO | 24 | 1725  | 0.0002<br>31133 | 0.00943<br>9051 |                                                                                                                                                                                                                                                                                                                                                                                                                                                                                                                                                                                                                                                                                                                                                                                                                                                                                                                  |
| intracellular membrane-bounded organelle                 | GO | 99 | 10581 | 0.0002<br>58371 | 0.01041<br>2853 |                                                                                                                                                                                                                                                                                                                                                                                                                                                                                                                                                                                                                                                                                                                                                                                                                                                                                                                  |

|                                                        |      |     |       |                 |                 |                                                                                                                                                                                                                                                                                                                                                                                                                                                                                                                                                      |
|--------------------------------------------------------|------|-----|-------|-----------------|-----------------|------------------------------------------------------------------------------------------------------------------------------------------------------------------------------------------------------------------------------------------------------------------------------------------------------------------------------------------------------------------------------------------------------------------------------------------------------------------------------------------------------------------------------------------------------|
| regulation of cell-cell adhesion                       | GO   | 10  | 415   | 0.0002<br>57906 | 0.01041<br>2853 | HLA-F ZNFX1<br>LGALS9 HLA-E MX2<br>CASP1 PSMG2<br>AMBRA1 UBD HLA-A<br>JUNB DSN1 SHISA5<br>RGS10 TESPA1<br>SYT4 SAMHD1<br>BOLA3 ZNF831 ECT2<br>CSH1 GBP2<br>SOCS1 HLA-G IDO1<br>CD83 IL6 LGALS9<br>HLA-E TNFSF4 HLA-A<br>TESPA1<br>CMPK2 MX1 TAP2<br>OAS2 OAS1 TAP1<br>TYMP TTF2 RNF213<br>UQCRHL NT5C3A<br>GBP1 GBP4<br>ATP6V1F RAB32<br>MX2 GNA15<br>SAMHD1 GBP2                                                                                                                                                                                    |
| nucleobase-containing small molecule metabolic process | GO   | 19  | 1232  | 0.0002<br>60094 | 0.01045<br>9394 | ATP6V1F RAB32<br>MX2 GNA15<br>SAMHD1 GBP2                                                                                                                                                                                                                                                                                                                                                                                                                                                                                                            |
| Cell adhesion molecules (CAMs)                         | KEGG | 6   | 143   | 0.0002<br>64707 | 0.01059<br>864  | HLA-G HLA-C CD58<br>HLA-F HLA-E HLA-A<br>ISG15 IFITM1 OASL<br>CMPK2 HERC6<br>CXCL11 MX1 DDX60<br>IFI35 CXCL10 OAS3<br>SOCS1 STAT1 IFI44L<br>RTP4 IFI6 PLSCR1<br>TAP2 HERC5 PPA1<br>MDK OAS2 UBE2L6<br>TRIM69 IFIT3 B2M<br>SLC15A3 RSAD2<br>HLA-G PSMB9<br>FCGR1A IFI27 IFI30<br>CXCL9 SP110 DDX58<br>PARP12 OAS1 ISG20<br>WARS RNF19B IRF9<br>TDRD7 TAP1<br>CENPW NMI IFIT1<br>TRIM22 DYNLT1<br>KIR2DL3 OR4C15<br>IFI16 IFIT2 TYMP<br>ETV7 SP100 PML<br>BCL2A1 LILRA2 TTF2<br>IFIH1 ZFP36 RPL39L<br>MSRA RNF213<br>BIRC3 NFKBIE HLA-C<br>KPNA2 NCAPG |
| molecular_ function                                    | GO   | 146 | 16545 | 0.0002<br>67154 | 0.01067<br>3403 | BIRC3 NFKBIE HLA-C<br>KPNA2 NCAPG                                                                                                                                                                                                                                                                                                                                                                                                                                                                                                                    |



|               |    |    |      |        |         |                   |
|---------------|----|----|------|--------|---------|-------------------|
|               |    |    |      |        |         | SAMD9L UQCRHL     |
|               |    |    |      |        |         | NT5C3A MRPS18C    |
|               |    |    |      |        |         | LCMT1 GBP1 SAMD9  |
|               |    |    |      |        |         | GBP4 ZC2HC1B      |
|               |    |    |      |        |         | ATP6V1F TRIM31    |
|               |    |    |      |        |         | PGP UNC93B1       |
|               |    |    |      |        |         | RAB32 TYROBP      |
|               |    |    |      |        |         | SRGN APOL6 EGR2   |
|               |    |    |      |        |         | CCNE1 LAIR2 PRTN3 |
|               |    |    |      |        |         | IDO1 TLR3 TRANK1  |
|               |    |    |      |        |         | XAF1 ORAI2 MELK   |
|               |    |    |      |        |         | XCL2 RGS1 SYNGR2  |
|               |    |    |      |        |         | HELZ2 CD58 TRIM48 |
|               |    |    |      |        |         | TREM2 EIF2AK2     |
|               |    |    |      |        |         | RARRES3 PRAMEF1   |
|               |    |    |      |        |         | CCL4 VAMP5 HLA-F  |
|               |    |    |      |        |         | ZNFX1 IL6 LGALS9  |
|               |    |    |      |        |         | HLA-E CHRNA3 MX2  |
|               |    |    |      |        |         | CASP1 PSMG2       |
|               |    |    |      |        |         | AMBRA1 OR2B6      |
|               |    |    |      |        |         | KIR2DL2 UBD       |
|               |    |    |      |        |         | CLEC4E TNFSF4     |
|               |    |    |      |        |         | HLA-A GNA15 JUNB  |
|               |    |    |      |        |         | SPRR2A CCL20      |
|               |    |    |      |        |         | CCL3L3 DSN1       |
|               |    |    |      |        |         | SHISA5 KLRD1      |
|               |    |    |      |        |         | RGS10 HCST        |
|               |    |    |      |        |         | TESPA1 SYT4       |
|               |    |    |      |        |         | SAMHD1 OR4C45     |
|               |    |    |      |        |         | BOLA3 ZNF831 ECT2 |
|               |    |    |      |        |         | OR52E8 RASSF3     |
|               |    |    |      |        |         | CSH1 GBP2         |
|               |    |    |      |        |         | CMPK2 MX1 TAP2    |
|               |    |    |      |        |         | TAP1 TTF2 RNF213  |
| nucleoside    |    |    |      |        |         | UQCRHL GBP1       |
| triphosphate  |    |    |      |        |         | GBP4 ATP6V1F      |
| metabolic     |    |    |      | 0.0002 | 0.01097 | RAB32 MX2 GNA15   |
| process       | GO | 15 | 851  | 75852  | 3293    | SAMHD1 GBP2       |
|               |    |    |      |        |         | MX1 TAP2 OAS2     |
|               |    |    |      |        |         | OAS1 TAP1 TTF2    |
|               |    |    |      |        |         | RNF213 UQCRHL     |
|               |    |    |      |        |         | NT5C3A GBP1 GBP4  |
|               |    |    |      |        |         | ATP6V1F RAB32     |
|               |    |    |      | 0.0002 | 0.01117 | MX2 GNA15         |
|               |    |    |      |        |         | SAMHD1 GBP2       |
|               |    |    |      |        |         | SOCS1 HLA-G CD83  |
|               |    |    |      |        |         | IL6 LGALS9 HLA-E  |
|               |    |    |      | 0.0002 | 0.01129 | TNFSF4 HLA-A      |
|               |    |    |      |        |         | TESPA1            |
| purine-       |    |    |      |        |         |                   |
| containing    |    |    |      |        |         |                   |
| compound      |    |    |      |        |         |                   |
| metabolic     |    |    |      |        |         |                   |
| process       | GO | 17 | 1043 | 81597  | 7682    |                   |
| positive      |    |    |      |        |         |                   |
| regulation of |    |    |      |        |         |                   |
| cell          |    |    |      |        |         |                   |
| activation    | GO | 9  | 344  | 8574   | 3486    |                   |

|                                                             |    |    |      |                 |                 |                                                                                                                                                                                                                                                     |
|-------------------------------------------------------------|----|----|------|-----------------|-----------------|-----------------------------------------------------------------------------------------------------------------------------------------------------------------------------------------------------------------------------------------------------|
| regulation of chemotaxis                                    | GO | 7  | 206  | 0.0002<br>91167 | 0.01146<br>6224 | CXCL11 CXCL10<br>CXCL9 XCL2 CCL4<br>IL6 LGALS9                                                                                                                                                                                                      |
| negative regulation of cysteine-type endopeptidase activity | GO | 5  | 94   | 0.0003<br>02598 | 0.01188<br>3247 | IFI6 LAMP3 IFI16<br>BIRC3 IL6<br>ISG15 CXCL11<br>CXCL10 STAT1 IFI6                                                                                                                                                                                  |
| regulation of homeostatic process                           | GO | 11 | 505  | 0.0003<br>03951 | 0.01191<br>0989 | B2M CXCL9 PML<br>ZFP36 IL6 LGALS9<br>HLA-G IDO1 IL6                                                                                                                                                                                                 |
| regulation of lymphocyte proliferation                      | GO | 7  | 208  | 0.0003<br>07962 | 0.01199<br>1621 | LGALS9 HLA-E<br>TNFSF4 HLA-A<br>RSAD2 SP100 PML<br>NFKBIE GBP1 SRGN                                                                                                                                                                                 |
| negative regulation of transport humoral immune response    | GO | 11 | 507  | 0.0003<br>13868 | 0.01219<br>5815 | PRTN3 IL6 LGALS9<br>TNFSF4 SYT4<br>B2M PRTN3 CD83<br>TREM2 IL6 HLA-E<br>HLA-A<br>SOCS1 TAP2 B2M<br>HLA-G FCGR1A<br>LAMP3 TAP1<br>DYNLT1 PML HLA-C<br>SAMD9L SAMD9<br>UNC93B1 RAB32<br>TYROBP SRGN<br>PRTN3 TLR3<br>SYNGR2 CD58<br>VAMP5 HLA-F HLA-E |
| cytoplasmic vesicle                                         | GO | 28 | 2170 | 0.0003<br>21716 | 0.01244<br>8263 | AMBRA1 HLA-A<br>DSN1 SYT4 CSH1<br>SOCS1 RSAD2 PML<br>GBP1 SRGN CD58<br>IL6 LGALS9 HLA-E<br>CHRNA3 CASP1                                                                                                                                             |
| regulation of secretion                                     | GO | 14 | 772  | 0.0003<br>2424  | 0.01249<br>3409 | CLEC4E TNFSF4<br>SYT4<br>SOCS1 PLSCR1<br>HLA-G IDO1 CD83<br>IL6 LGALS9 HLA-E                                                                                                                                                                        |
| regulation of leukocyte activation                          | GO | 11 | 509  | 0.0003<br>24055 | 0.01249<br>3409 | TNFSF4 HLA-A<br>TESPA1<br>SOCS1 TAP2 B2M<br>HLA-G FCGR1A<br>LAMP3 TAP1                                                                                                                                                                              |
| intracellular vesicle                                       | GO | 28 | 2173 | 0.0003<br>25561 | 0.01251<br>8114 | DYNLT1 PML HLA-C<br>SAMD9L SAMD9                                                                                                                                                                                                                    |

|                                                                                                                                                                 |                |          |             |                  |                    |                                                                                                                                                                                                                                                                                                                                                                                                                                                                                                                                                                                                        |
|-----------------------------------------------------------------------------------------------------------------------------------------------------------------|----------------|----------|-------------|------------------|--------------------|--------------------------------------------------------------------------------------------------------------------------------------------------------------------------------------------------------------------------------------------------------------------------------------------------------------------------------------------------------------------------------------------------------------------------------------------------------------------------------------------------------------------------------------------------------------------------------------------------------|
|                                                                                                                                                                 |                |          |             |                  |                    | UNC93B1 RAB32<br>TYROBP SRGN<br>PRTN3 TLR3<br>SYNGR2 CD58<br>VAMP5 HLA-F HLA-E<br>AMBRA1 HLA-A<br>DSN1 SYT4 CSH1                                                                                                                                                                                                                                                                                                                                                                                                                                                                                       |
| innate<br>immune<br>response-<br>activating<br>signal<br>transduction<br>recycling<br>endosome                                                                  | GO<br>GO       | 8<br>6   | 279<br>150  | 0.0003<br>0.0003 | 0.01278<br>0.01281 | PSMB9 DDX58 IFIH1<br>BIRC3 UNC93B1<br>TLR3 LGALS9<br>CLEC4E<br>B2M HLA-G HLA-C<br>HLA-F HLA-E HLA-A<br>ISG15 CXCL10<br>STAT1 B2M HLA-G<br>PSMB9 WARS<br>DYNLT1 TYMP<br>SP100 PML ZFP36<br>TYROBP SRGN IDO1<br>TLR3 CD83 EIF2AK2<br>IL6 LGALS9 CHRNA3<br>TNFSF4 TESPA1<br>SYT4 ECT2<br>ISG15 IFITM1<br>CXCL10 STAT1 B2M<br>HLA-G PSMB9<br>CXCL9 WARS<br>DYNLT1 TYMP<br>SP100 PML ZFP36<br>GBP1 TYROBP<br>SRGN CCNE1 IDO1<br>TLR3 CD83 EIF2AK2<br>PRAMEF1 IL6<br>LGALS9 CHRNA3<br>TNFSF4 JUNB<br>TESPA1 SYT4 ECT2<br>MX1 TAP2 TAP1<br>TTF2 RNF213 GBP1<br>GBP4 ATP6V1F<br>RAB32 MX2 GNA15<br>SAMHD1 GBP2 |
| regulation of<br>multicellular<br>organismal<br>developmen<br>t                                                                                                 | GO             | 25       | 1857        | 0.0003<br>0.0003 | 0.01285<br>5008    |                                                                                                                                                                                                                                                                                                                                                                                                                                                                                                                                                                                                        |
| regulation of<br>developmen<br>tal process<br>purine-<br>containing<br>compound<br>catabolic<br>process<br>positive<br>regulation of<br>T cell<br>proliferation | GO<br>GO<br>GO | 31<br>13 | 2538<br>690 | 0.0003<br>0.0003 | 0.01349<br>0.01359 |                                                                                                                                                                                                                                                                                                                                                                                                                                                                                                                                                                                                        |
| regulation of<br>lymphocyte<br>activation                                                                                                                       | GO             | 10       | 435         | 0.0003           | 0.01377            | IL6 LGALS9 HLA-E<br>TNFSF4 HLA-A<br>SOCS1 HLA-G IDO1<br>CD83 IL6 LGALS9<br>HLA-E TNFSF4 HLA-<br>A TESPA1                                                                                                                                                                                                                                                                                                                                                                                                                                                                                               |

|                                                            |    |    |      |                 |                 |                                                                                                                                                                                                                                      |
|------------------------------------------------------------|----|----|------|-----------------|-----------------|--------------------------------------------------------------------------------------------------------------------------------------------------------------------------------------------------------------------------------------|
| positive regulation of cell communication                  | GO | 25 | 1876 | 0.0003<br>72521 | 0.01388<br>6097 | CXCL11 DDX60<br>CXCL10 RSAD2<br>PSMB9 CXCL9<br>TRIM22 PML BIRC3<br>TLR3 XCL2 TREM2<br>EIF2AK2 CCL4 IL6<br>LGALS9 CASP1<br>AMBRA1 UBD CCL20<br>CCL3L3 SHISA5<br>HCST TESPA1 ECT2<br>CXCL11 CXCL10<br>CXCL9 TYMP EGR2<br>XCL2 CCL4 IL6 |
| chemotaxis regulation of interferon-gamma production       | GO | 11 | 518  | 0.0003<br>73395 | 0.01388<br>6097 | LGALS9 CCL20<br>CCL3L3                                                                                                                                                                                                               |
| Golgi membrane regulation of cellular protein localization | GO | 13 | 695  | 0.0003<br>86969 | 0.01404<br>2946 | ISG15 TLR3 LGALS9<br>TNFSF4 HLA-A<br>B2M HLA-G HLA-C<br>GBP1 GBP4<br>UNC93B1 SRGN                                                                                                                                                    |
| positive regulation of cytoplasmic transport               | GO | 8  | 286  | 0.0003<br>94571 | 0.01428<br>2938 | TLR3 HLA-F HLA-E<br>HLA-A SYT4 GBP2<br>IFI27 DDX58 SP100<br>PML NFKBIE GBP1                                                                                                                                                          |
| myeloid leukocyte differentiation                          | GO | 12 | 607  | 0.0003<br>91541 | 0.01442<br>2798 | CCNE1 TLR3 TREM2<br>IL6 LGALS9 ECT2                                                                                                                                                                                                  |
| regulation of cytokine biosynthetic process                | GO | 5  | 100  | 0.0003<br>96752 | 0.01450<br>5389 | CXCL11 CXCL10<br>CXCL9 DDX58 TLR3<br>IL6 LGALS9 ECT2                                                                                                                                                                                 |
| helicase activity                                          | GO | 5  | 100  | 0.0003<br>96752 | 0.01452<br>7576 | IFI16 PRTN3 LGALS9<br>UBD JUNB                                                                                                                                                                                                       |
| response to organic cyclic compound                        | GO | 6  | 155  | 0.0003<br>99731 | 0.01452<br>7576 | NMI ZFP36 TLR3 IL6<br>CCL20<br>DDX60 DDX58 TTF2                                                                                                                                                                                      |
|                                                            | GO | 6  | 155  | 0.0003<br>99731 | 0.01459<br>1687 | IFIH1 TRANK1<br>HELZ2<br>CXCL10 SOCS1<br>STAT1 MDK PSMB9<br>DDX58 IFIT1 ZFP36<br>CCNE1 TLR3 CD83<br>EIF2AK2 IL6                                                                                                                      |
|                                                            | GO | 16 | 980  | 0.0004<br>02913 | 0.01466<br>5716 | CHRNA3 CASP1<br>JUNB                                                                                                                                                                                                                 |

|                                                    |    |    |      |                 |                 |                                                                                                                                                                                                                                                                                                                                                                                                                  |
|----------------------------------------------------|----|----|------|-----------------|-----------------|------------------------------------------------------------------------------------------------------------------------------------------------------------------------------------------------------------------------------------------------------------------------------------------------------------------------------------------------------------------------------------------------------------------|
| regulation of mononuclear cell proliferation       | GO | 7  | 218  | 0.0004<br>03951 | 0.01467<br>4508 | HLA-G IDO1 IL6<br>LGALS9 HLA-E<br>TNFSF4 HLA-A<br>OASL CMPK2 MX1<br>DDX60 OAS3 IFI44L<br>TAP2 OAS2 DDX58<br>OAS1 WARS TAP1<br>TTF2 IFIH1 GBP1<br>GBP4 RAB32<br>TRANK1 MELK                                                                                                                                                                                                                                       |
| purine nucleotide binding                          | GO | 25 | 1898 | 0.0004<br>17856 | 0.01511<br>5055 | HELZ2 EIF2AK2 MX2<br>GNA15 SAMHD1<br>GBP2<br>CXCL11 DDX60<br>CXCL10 SOCS1<br>STAT1 CXCL9<br>TRIM22 PML BIRC3<br>GBP1 TLR3 XCL2<br>TREM2 EIF2AK2<br>CCL4 IL6 LGALS9<br>CASP1 UBD CCL20<br>CCL3L3 SHISA5<br>HCST ECT2<br>CMPK2 MX1 PLSCR1<br>TAP2 PPA1 OAS2<br>PSMB9 OAS1 TAP1<br>TYMP PML TTF2<br>ZFP36 RNF213<br>UQCRHL NT5C3A<br>GBP1 GBP4<br>ATP6V1F PGP<br>RAB32 CCNE1 TLR3<br>MELK EIF2AK2<br>RARRES3 LGALS9 |
| regulation of intracellular signal transduction    | GO | 24 | 1756 | 0.0004<br>1854  | 0.01511<br>5055 | MX2 GNA15 HCST<br>SAMHD1 GBP2                                                                                                                                                                                                                                                                                                                                                                                    |
| phosphate-containing compound metabolic process    | GO | 32 | 2657 | 0.0004<br>40475 | 0.01587<br>6056 | MX2 GNA15 HCST<br>SAMHD1 GBP2                                                                                                                                                                                                                                                                                                                                                                                    |
| positive regulation of protein import into nucleus | GO | 5  | 103  | 0.0004<br>51366 | 0.01623<br>6821 | DDX58 TLR3 IL6<br>LGALS9 ECT2<br>OASL CMPK2 MX1<br>DDX60 OAS3 IFI44L<br>TAP2 OAS2 DDX58<br>OAS1 WARS TAP1<br>TTF2 IFIH1 GBP1<br>GBP4 RAB32<br>TRANK1 MELK                                                                                                                                                                                                                                                        |
| purine ribonucleoside triphosphate binding         | GO | 24 | 1783 | 0.0004<br>61788 | 0.01654<br>7111 | HELZ2 EIF2AK2 MX2<br>GNA15 GBP2                                                                                                                                                                                                                                                                                                                                                                                  |

|                                                                   |    |    |      |                 |                 |                                                                                                                                                                                                                                                                                                                                                                                                                                                                                                                                                                                                                                                                                                                                                                                                                                              |
|-------------------------------------------------------------------|----|----|------|-----------------|-----------------|----------------------------------------------------------------------------------------------------------------------------------------------------------------------------------------------------------------------------------------------------------------------------------------------------------------------------------------------------------------------------------------------------------------------------------------------------------------------------------------------------------------------------------------------------------------------------------------------------------------------------------------------------------------------------------------------------------------------------------------------------------------------------------------------------------------------------------------------|
| organelle membrane                                                | GO | 34 | 2895 | 0.0004<br>72939 | 0.01691<br>3785 | MX1 TAP2 B2M<br>SLC15A3 RSAD2<br>HLA-G FCGR1A<br>LAMP3 IFI27 TAP1<br>PML BCL2A1 HLA-C<br>UQCRHL MRPS18C<br>GBP1 GBP4<br>ATP6V1F UNC93B1<br>RAB32 TYROBP<br>SRGN TLR3 SYNGR2<br>CD58 VAMP5 HLA-F<br>HLA-E MX2 AMBRA1<br>HLA-A SHISA5 SYT4<br>GBP2<br>CMPK2 MX1 PLSCR1<br>TAP2 OAS2 OAS1<br>TAP1 TYMP TTF2<br>RNF213 UQCRHL<br>NT5C3A GBP1 GBP4<br>ATP6V1F PGP<br>RAB32 RARRES3<br>MX2 GNA15<br>SAMHD1 GBP2<br>ISG15 IFITM1 STAT1<br>HLA-G CXCL9 ZFP36<br>CCNE1 CD83 IL6<br>LGALS9 TNFSF4<br>JUNB TESPA1 SYT4<br>ECT2<br>HLA-G IDO1 IL6<br>LGALS9 HLA-E<br>TNFSF4 HLA-A<br>XCL2 CCL4 IL6<br>CCL20 CCL3L3<br>DDX58 TLR3 IL6<br>LGALS9 ECT2<br>CXCL11 CXCL10<br>B2M CXCL9 DDX58<br>TLR3 CD58 CCL4 IL6<br>LGALS9 HLA-E<br>CASP1 CLEC4E<br>TNFSF4 SYT4 ECT2<br>CD58 IL6 LGALS9<br>HLA-E CASP1<br>CLEC4E TNFSF4<br>ISG15 CXCL10<br>SOCS1 IFI6 HERC5 |
| organophosphate metabolic process                                 | GO | 22 | 1606 | 0.0004<br>8371  | 0.01726<br>5444 |                                                                                                                                                                                                                                                                                                                                                                                                                                                                                                                                                                                                                                                                                                                                                                                                                                              |
| positive regulation of cell differentiation                       | GO | 15 | 902  | 0.0004<br>92392 | 0.01737<br>3333 |                                                                                                                                                                                                                                                                                                                                                                                                                                                                                                                                                                                                                                                                                                                                                                                                                                              |
| regulation of leukocyte proliferation myeloid leukocyte migration | GO | 7  | 227  | 0.0005<br>09457 | 0.01773<br>9808 |                                                                                                                                                                                                                                                                                                                                                                                                                                                                                                                                                                                                                                                                                                                                                                                                                                              |
| positive regulation of protein import                             | GO | 5  | 106  | 0.0005<br>11447 | 0.01773<br>9808 |                                                                                                                                                                                                                                                                                                                                                                                                                                                                                                                                                                                                                                                                                                                                                                                                                                              |
| positive regulation of transport                                  | GO | 16 | 1006 | 0.0005<br>27294 | 0.01825<br>5079 |                                                                                                                                                                                                                                                                                                                                                                                                                                                                                                                                                                                                                                                                                                                                                                                                                                              |
| positive regulation of protein secretion                          | GO | 7  | 229  | 0.0005<br>35632 | 0.01850<br>895  |                                                                                                                                                                                                                                                                                                                                                                                                                                                                                                                                                                                                                                                                                                                                                                                                                                              |
| regulation of cellular                                            | GO | 32 | 2716 | 0.0005<br>41517 | 0.01867<br>7275 |                                                                                                                                                                                                                                                                                                                                                                                                                                                                                                                                                                                                                                                                                                                                                                                                                                              |

|                                                                                                                                                                                                                        |              |    |      |                 |                 |                                                                                                                                                                                                                                                       |
|------------------------------------------------------------------------------------------------------------------------------------------------------------------------------------------------------------------------|--------------|----|------|-----------------|-----------------|-------------------------------------------------------------------------------------------------------------------------------------------------------------------------------------------------------------------------------------------------------|
| protein<br>metabolic<br>process                                                                                                                                                                                        |              |    |      |                 |                 | PSMB9 LAMP3 IFI27<br>WARS RNF19B NMI<br>IFI16 PML ZFP36<br>BIRC3 LCMT1 GBP1<br>CCNE1 TLR3 XCL2<br>TREM2 EIF2AK2<br>CCL4 IL6 LGALS9<br>CHRNA3 CASP1<br>PSMG2 CCL20<br>CCL3L3 ECT2 SVBP                                                                 |
| TNF<br>signaling<br>pathway                                                                                                                                                                                            | KEGG         | 5  | 108  | 0.0005<br>54708 | 0.01902<br>5349 | CXCL10 BIRC3 IL6<br>JUNB CCL20<br>OASL CMPK2 MX1<br>DDX60 OAS3 IFI44L<br>TAP2 OAS2 DDX58<br>OAS1 WARS TAP1<br>TTF2 IFIH1 GBP1<br>GBP4 RAB32<br>TRANK1 MELK<br>HELZ2 EIF2AK2 MX2<br>GNA15 GBP2                                                         |
| purine<br>ribonucleoti<br>de binding<br>Antigen<br>processing:<br>Ubiquitinatio<br>n &<br>Proteasome<br>degradation<br>regulation of<br>sequence-<br>specific<br>DNA<br>binding<br>transcription<br>factor<br>activity | GO           | 24 | 1827 | 0.0005<br>65389 | 0.01935<br>5653 | HERC6 SOCS1<br>HERC5 UBE2L6<br>TRIM69 PSMB9<br>RNF19B RNF213                                                                                                                                                                                          |
| regulation of<br>interleukin-6<br>production                                                                                                                                                                           | REACTO<br>ME | 8  | 303  | 0.0005<br>69113 | 0.01943<br>8979 | DDX58 TRIM22<br>SP100 TRIM31 TLR3<br>EIF2AK2 IL6 LGALS9<br>TNFSF4                                                                                                                                                                                     |
| purine<br>ribonucleosi<br>de binding<br>regulation of<br>cell<br>activation                                                                                                                                            | GO           | 9  | 380  | 0.0005<br>71274 | 0.01944<br>8651 | DDX58 TLR3 IL6<br>LGALS9 TNFSF4<br>OASL CMPK2 MX1<br>DDX60 OAS3 IFI44L<br>TAP2 OAS2 DDX58<br>OAS1 WARS TAP1<br>TTF2 IFIH1 GBP1<br>GBP4 RAB32<br>TRANK1 MELK<br>HELZ2 EIF2AK2 MX2<br>GNA15 GBP2<br>SOCS1 PLSCR1<br>HLA-G IDO1 CD83<br>IL6 LGALS9 HLA-E |
|                                                                                                                                                                                                                        | GO           | 5  | 109  | 0.0005<br>77339 | 0.01961<br>8864 |                                                                                                                                                                                                                                                       |
|                                                                                                                                                                                                                        | GO           | 24 | 1833 | 0.0005<br>83003 | 0.01977<br>4865 |                                                                                                                                                                                                                                                       |
|                                                                                                                                                                                                                        | GO           | 11 | 548  | 0.0005<br>85515 | 0.01982<br>3559 |                                                                                                                                                                                                                                                       |

|               |    |     |       |        |         |                    |
|---------------|----|-----|-------|--------|---------|--------------------|
|               |    |     |       |        |         | TNFSF4 HLA-A       |
|               |    |     |       |        |         | TESPA1             |
|               |    |     |       |        |         | ISG15 OASL CMPK2   |
|               |    |     |       |        |         | HERC6 MX1 DDX60    |
|               |    |     |       |        |         | IFI35 OAS3 SOCS1   |
|               |    |     |       |        |         | STAT1 IFI44L RTP4  |
|               |    |     |       |        |         | IFI6 PLSCR1 TAP2   |
|               |    |     |       |        |         | HERC5 PPA1 MDK     |
|               |    |     |       |        |         | OAS2 UBE2L6        |
|               |    |     |       |        |         | TRIM69 IFIT3 B2M   |
|               |    |     |       |        |         | SLC15A3 RSAD2      |
|               |    |     |       |        |         | HLA-G PSMB9 IFI44  |
|               |    |     |       |        |         | FCGR1A LAMP3       |
|               |    |     |       |        |         | IFI27 IFI30 SP110  |
|               |    |     |       |        |         | DDX58 PARP12       |
|               |    |     |       |        |         | OAS1 ISG20 WARS    |
|               |    |     |       |        |         | RNF19B IRF9 TDRD7  |
|               |    |     |       |        |         | TAP1 CENPW NMI     |
|               |    |     |       |        |         | IFIT1 TRIM22       |
|               |    |     |       |        |         | DYNLT1 IFI16 IFIT2 |
|               |    |     |       |        |         | TYMP ETV7 SP100    |
|               |    |     |       |        |         | PML BCL2A1 TTF2    |
|               |    |     |       |        |         | IFIH1 ZFP36 RPL39L |
|               |    |     |       |        |         | MSRA RNF213        |
|               |    |     |       |        |         | BIRC3 NFKBIE HLA-  |
|               |    |     |       |        |         | C KPNA2 NCAPG      |
|               |    |     |       |        |         | SAMD9L UQCRHL      |
|               |    |     |       |        |         | NT5C3A MRPS18C     |
|               |    |     |       |        |         | LCMT1 GBP1 SAMD9   |
|               |    |     |       |        |         | GBP4 ATP6V1F       |
|               |    |     |       |        |         | TRIM31 PGP         |
|               |    |     |       |        |         | UNC93B1 RAB32      |
|               |    |     |       |        |         | TYROBP SRGN        |
|               |    |     |       |        |         | APOL6 EGR2 CCNE1   |
|               |    |     |       |        |         | PRTN3 IDO1 TLR3    |
|               |    |     |       |        |         | XAF1 MELK RGS1     |
|               |    |     |       |        |         | SYNGR2 HELZ2       |
|               |    |     |       |        |         | CD58 TREM2         |
|               |    |     |       |        |         | EIF2AK2 RARRES3    |
|               |    |     |       |        |         | VAMP5 HLA-F ZNFX1  |
|               |    |     |       |        |         | IL6 LGALS9 HLA-E   |
|               |    |     |       |        |         | CHRNA3 MX2 CASP1   |
|               |    |     |       |        |         | PSMG2 AMBRA1       |
|               |    |     |       |        |         | UBD HLA-A GNA15    |
|               |    |     |       |        |         | JUNB SPRR2A DSN1   |
|               |    |     |       |        |         | SHISA5 RGS10       |
|               |    |     |       |        |         | TESPA1 SYT4        |
|               |    |     |       |        |         | SAMHD1 BOLA3       |
| intracellular |    |     |       | 0.0005 | 0.01982 | ZNF831 ECT2        |
| part          | GO | 123 | 13993 | 90206  | 9329    | RASSF3 CSH1 GBP2   |



|                                                         |    |    |      |                 |                 |                                                                                                                                                                                                                                                                                         |
|---------------------------------------------------------|----|----|------|-----------------|-----------------|-----------------------------------------------------------------------------------------------------------------------------------------------------------------------------------------------------------------------------------------------------------------------------------------|
| purine nucleoside binding                               | GO | 24 | 1836 | 0.0005<br>92145 | 0.01982<br>9329 | OASL CMPK2 MX1<br>DDX60 OAS3 IFI44L<br>TAP2 OAS2 DDX58<br>OAS1 WARS TAP1<br>TTF2 IFIH1 GBP1<br>GBP4 RAB32<br>TRANK1 MELK<br>HELZ2 EIF2AK2 MX2<br>GNA15 GBP2<br>OASL CMPK2 MX1<br>DDX60 OAS3 IFI44L<br>TAP2 OAS2 DDX58<br>OAS1 WARS TAP1<br>TTF2 IFIH1 GBP1<br>GBP4 RAB32<br>TRANK1 MELK |
| ribonucleoside de binding                               | GO | 24 | 1836 | 0.0005<br>92145 | 0.01982<br>9329 | HELZ2 EIF2AK2 MX2<br>GNA15 GBP2                                                                                                                                                                                                                                                         |
| ribonucleoside de triphosphate catabolic process        | GO | 12 | 637  | 0.0005<br>89305 | 0.01982<br>9329 | MX1 TAP2 TAP1<br>TTF2 RNF213 GBP1<br>GBP4 ATP6V1F<br>RAB32 MX2 GNA15<br>GBP2                                                                                                                                                                                                            |
| purine ribonucleoside de triphosphate catabolic process | GO | 12 | 637  | 0.0005<br>89305 | 0.01982<br>9329 | MX1 TAP2 TAP1<br>TTF2 RNF213 GBP1<br>GBP4 ATP6V1F<br>RAB32 MX2 GNA15<br>GBP2                                                                                                                                                                                                            |
| plasma membrane protein complex                         | GO | 7  | 233  | 0.0005<br>91179 | 0.01982<br>9329 | B2M HLA-G HLA-C<br>HLA-F HLA-E HLA-A<br>GNA15<br>OASL CMPK2 MX1<br>DDX60 OAS3 IFI44L<br>TAP2 OAS2 DDX58<br>OAS1 WARS TAP1<br>TTF2 IFIH1 GBP1<br>GBP4 RAB32<br>TRANK1 MELK                                                                                                               |
| nucleoside binding                                      | GO | 24 | 1843 | 0.0006<br>14364 | 0.02046<br>1774 | HELZ2 EIF2AK2 MX2<br>GNA15 GBP2<br>IFI6 PSMB9 LAMP3<br>IFI27 RNF19B IFI16<br>PML BIRC3 LCMT1                                                                                                                                                                                            |
| regulation of proteolysis                               | GO | 14 | 826  | 0.0006<br>13454 | 0.02046<br>1774 | TLR3 IL6 LGALS9<br>CASP1 PSMG2<br>OASL CMPK2 MX1<br>DDX60 OAS3 IFI44L                                                                                                                                                                                                                   |
| ribonucleotide de binding                               | GO | 24 | 1844 | 0.0006<br>17641 | 0.02053<br>3786 | TAP2 OAS2 DDX58<br>OAS1 WARS TAP1                                                                                                                                                                                                                                                       |

|               |    |     |       |        |         |                    |
|---------------|----|-----|-------|--------|---------|--------------------|
|               |    |     |       |        |         | TTF2 IFIH1 GBP1    |
|               |    |     |       |        |         | GBP4 RAB32         |
|               |    |     |       |        |         | TRANK1 MELK        |
|               |    |     |       |        |         | HELZ2 EIF2AK2 MX2  |
|               |    |     |       |        |         | GNA15 GBP2         |
|               |    |     |       |        |         | ISG15 OASL CMPK2   |
|               |    |     |       |        |         | HERC6 MX1 DDX60    |
|               |    |     |       |        |         | IFI35 OAS3 SOCS1   |
|               |    |     |       |        |         | STAT1 IFI44L RTP4  |
|               |    |     |       |        |         | IFI6 PLSCR1 TAP2   |
|               |    |     |       |        |         | HERC5 PPA1 MDK     |
|               |    |     |       |        |         | OAS2 UBE2L6        |
|               |    |     |       |        |         | TRIM69 IFIT3 B2M   |
|               |    |     |       |        |         | SLC15A3 RSAD2      |
|               |    |     |       |        |         | HLA-G PSMB9 IFI44  |
|               |    |     |       |        |         | FCGR1A LAMP3       |
|               |    |     |       |        |         | IFI27 IFI30 SP110  |
|               |    |     |       |        |         | DDX58 PARP12       |
|               |    |     |       |        |         | OAS1 ISG20 WARS    |
|               |    |     |       |        |         | RNF19B IRF9 TDRD7  |
|               |    |     |       |        |         | TAP1 CENPW NMI     |
|               |    |     |       |        |         | IFIT1 TRIM22       |
|               |    |     |       |        |         | DYNLT1 IFI16 IFIT2 |
|               |    |     |       |        |         | TYMP ETV7 SP100    |
|               |    |     |       |        |         | PML BCL2A1 TTF2    |
|               |    |     |       |        |         | IFIH1 ZFP36 RPL39L |
|               |    |     |       |        |         | MSRA RNF213        |
|               |    |     |       |        |         | BIRC3 NFKBIE HLA-  |
|               |    |     |       |        |         | C KPNA2 NCAPG      |
|               |    |     |       |        |         | SAMD9L UQCRHL      |
|               |    |     |       |        |         | NT5C3A MRPS18C     |
|               |    |     |       |        |         | LCMT1 GBP1 SAMD9   |
|               |    |     |       |        |         | GBP4 ATP6V1F       |
|               |    |     |       |        |         | TRIM31 PGP         |
|               |    |     |       |        |         | UNC93B1 RAB32      |
|               |    |     |       |        |         | TYROBP SRGN        |
|               |    |     |       |        |         | APOL6 EGR2 CCNE1   |
|               |    |     |       |        |         | PRTN3 IDO1 TLR3    |
|               |    |     |       |        |         | XAF1 MELK RGS1     |
|               |    |     |       |        |         | SYNGR2 HELZ2       |
|               |    |     |       |        |         | CD58 TRIM48        |
|               |    |     |       |        |         | TREM2 EIF2AK2      |
|               |    |     |       |        |         | RARRES3 VAMP5      |
|               |    |     |       |        |         | HLA-F ZNFX1 IL6    |
|               |    |     |       |        |         | LGALS9 HLA-E       |
|               |    |     |       |        |         | CHRNA3 MX2 CASP1   |
|               |    |     |       |        |         | PSMG2 AMBRA1       |
|               |    |     |       |        |         | UBD HLA-A GNA15    |
|               |    |     |       |        |         | JUNB SPRR2A        |
|               |    |     |       | 0.0006 | 0.02129 | CCL20 DSN1 SHISA5  |
| intracellular | GO | 125 | 14282 | 42712  | 0411    | RGS10 TESPA1       |

|                                                  |    |     |       |                 |                 |                                                                                                                                                                                                                                                                                                                                                                                                                                                                                                                                                                                                                                                                                                                                                                                                                                                                                                                              |
|--------------------------------------------------|----|-----|-------|-----------------|-----------------|------------------------------------------------------------------------------------------------------------------------------------------------------------------------------------------------------------------------------------------------------------------------------------------------------------------------------------------------------------------------------------------------------------------------------------------------------------------------------------------------------------------------------------------------------------------------------------------------------------------------------------------------------------------------------------------------------------------------------------------------------------------------------------------------------------------------------------------------------------------------------------------------------------------------------|
| purine nucleoside triphosphate metabolic process | GO | 14  | 830   | 0.0006<br>41589 | 0.02129<br>0411 | SYT4 SAMHD1<br>BOLA3 ZNF831 ECT2<br>RASSF3 CSH1 GBP2<br>MX1 TAP2 TAP1<br>TTF2 RNF213<br>UQCRHL GBP1<br>GBP4 ATP6V1F<br>RAB32 MX2 GNA15<br>SAMHD1 GBP2<br>ISG15 OASL CMPK2<br>HERC6 MX1 DDX60<br>IFI35 OAS3 SOCS1<br>STAT1 IFI44L IFI6<br>PLSCR1 TAP2<br>HERC5 OAS2<br>UBE2L6 TRIM69<br>IFIT3 B2M SLC15A3<br>RSAD2 HLA-G<br>PSMB9 FCGR1A<br>LAMP3 IFI27 IFI30<br>SP110 DDX58<br>PARP12 OAS1 ISG20<br>WARS RNF19B IRF9<br>TDRD7 TAP1<br>CENPW NMI TRIM22<br>DYNLT1 IFI16 IFIT2<br>ETV7 SP100 PML<br>BCL2A1 TTF2 IFIH1<br>ZFP36 RPL39L<br>MSRA RNF213<br>BIRC3 NFKBIE HLA-C<br>KPNA2 NCAPG<br>SAMD9L UQCRHL<br>NT5C3A MRPS18C<br>GBP1 SAMD9 GBP4<br>ATP6V1F TRIM31<br>UNC93B1 RAB32<br>TYROBP SRGN<br>EGR2 CCNE1 PRTN3<br>IDO1 TLR3 XAF1<br>MELK SYNGR2<br>HELZ2 CD58 TREM2<br>EIF2AK2 VAMP5<br>HLA-F ZNFX1<br>LGALS9 HLA-E<br>CHRNA3 MX2 CASP1<br>PSMG2 AMBRA1<br>UBD HLA-A JUNB<br>DSN1 SHISA5<br>RGS10 TESPA1<br>SYT4 SAMHD1 |
| intracellular organelle                          | GO | 109 | 12230 | 0.0006<br>50546 | 0.02147<br>2676 |                                                                                                                                                                                                                                                                                                                                                                                                                                                                                                                                                                                                                                                                                                                                                                                                                                                                                                                              |

|                                          |    |    |      |                 |                 |                                                                                                                                                                                                                                                                                                                                                                                                                                                                                                                                                                                                                                                             |
|------------------------------------------|----|----|------|-----------------|-----------------|-------------------------------------------------------------------------------------------------------------------------------------------------------------------------------------------------------------------------------------------------------------------------------------------------------------------------------------------------------------------------------------------------------------------------------------------------------------------------------------------------------------------------------------------------------------------------------------------------------------------------------------------------------------|
|                                          |    |    |      |                 |                 | BOLA3 ZNF831 ECT2<br>RASSF3 CSH1 GBP2<br>IFITM1 OASL MX1<br>CXCL10 OAS3 RTP4<br>IFI6 PLSCR1 TAP2<br>OAS2 TRIM69 B2M<br>SLC15A3 RSAD2<br>HLA-G FCGR1A<br>LAMP3 IFI27 IFI30<br>CXCL9 DDX58<br>RNF19B TAP1<br>IFI27L1 KIR2DL3<br>OR4C15 IFI16 PML<br>BCL2A1 LILRA2<br>MSRA RNF213<br>BIRC3 HLA-C KPNA2<br>NCAPG UQCRHL<br>MRPS18C GBP1<br>GBP4 ATP6V1F<br>UNC93B1 RAB32<br>TYROBP SRGN<br>PRTN3 TLR3 ORAI2<br>MELK RGS1<br>SYNGR2 HELZ2<br>CD58 CD83 TREM2<br>SMIM13 EIF2AK2<br>RARRES3 VAMP5<br>HLA-F IL6 HLA-E<br>CHRNA3 MX2<br>AMBRA1 OR2B6<br>KIR2DL2 CLEC4E<br>TNFSF4 HLA-A<br>GNA15 SPRR2A<br>SHISA5 KLRD1<br>RGS10 HCST<br>TESPA1 SYT4<br>SAMHD1 OR4C45 |
| membrane                                 | GO | 83 | 8951 | 0.0006<br>85283 | 0.02236<br>9431 | OR52E8 RASSF3<br>GBP2<br>MX1 TAP2 TAP1<br>TTF2 RNF213 GBP1<br>GBP4 ATP6V1F                                                                                                                                                                                                                                                                                                                                                                                                                                                                                                                                                                                  |
| nucleotide<br>catabolic<br>process       | GO | 13 | 741  | 0.0006<br>8535  | 0.02236<br>9431 | RAB32 MX2 GNA15<br>SAMHD1 GBP2<br>MX1 IFI44L GBP1<br>GBP4 RAB32 MX2                                                                                                                                                                                                                                                                                                                                                                                                                                                                                                                                                                                         |
| guanyl<br>nucleotide<br>binding          | GO | 9  | 390  | 0.0006<br>8252  | 0.02236<br>9431 | GNA15 SAMHD1<br>GBP2                                                                                                                                                                                                                                                                                                                                                                                                                                                                                                                                                                                                                                        |
| regulation of<br>protein<br>modification | GO | 8  | 312  | 0.0006<br>84016 | 0.02236<br>9431 | ISG15 PSMB9 NMI<br>PML BIRC3 LCMT1<br>PSMG2 SVBP                                                                                                                                                                                                                                                                                                                                                                                                                                                                                                                                                                                                            |

by small  
protein  
conjugation  
or removal

|                                                                                       |      |     |       |                 |                 |                                                                                                                                                  |
|---------------------------------------------------------------------------------------|------|-----|-------|-----------------|-----------------|--------------------------------------------------------------------------------------------------------------------------------------------------|
|                                                                                       |      |     |       |                 |                 | B2M HLA-G HLA-C<br>GBP1 GBP4<br>UNC93B1 RAB32<br>SRGN TLR3 VAMP5<br>HLA-F HLA-E HLA-A<br>SYT4 GBP2<br>HLA-G PSMB9<br>FCGR1A DDX58<br>IFIH1 BIRC3 |
| Golgi<br>apparatus<br>part                                                            | GO   | 15  | 934   | 0.0006<br>91557 | 0.02250<br>37   |                                                                                                                                                  |
| immune<br>response-<br>regulating<br>signaling<br>pathway                             | GO   | 10  | 475   | 0.0007<br>09563 | 0.02304<br>8893 | UNC93B1 TLR3<br>LGALS9 CLEC4E<br>MX1 TAP2 TAP1<br>TTF2 RNF213 GBP1<br>GBP4 ATP6V1F                                                               |
| nucleoside<br>phosphate<br>catabolic<br>process                                       | GO   | 13  | 746   | 0.0007<br>27081 | 0.02352<br>1831 | RAB32 MX2 GNA15<br>SAMHD1 GBP2                                                                                                                   |
| regulation of<br>tumor<br>necrosis<br>factor<br>superfamily<br>cytokine<br>production | GO   | 5   | 115   | 0.0007<br>27953 | 0.02352<br>1831 | ZFP36 TLR3 CCL4<br>LGALS9 HLA-E<br>IFITM1 CXCL11<br>CXCL10 CXCL9<br>DDX58 SP100 PML<br>TRIM31 XCL2 CCL4                                          |
| regulation of<br>locomotion                                                           | GO   | 14  | 843   | 0.0007<br>40665 | 0.02389<br>0678 | IL6 LGALS9 CCL20<br>SVBP<br>OAS2 TRIM69 SP110<br>DDX58 OAS1<br>RNF19B TRIM22 PML<br>TTF2 IFIH1 RNF213<br>BIRC3 TRIM31 XAF1                       |
| zinc ion<br>binding                                                                   | GO   | 17  | 1143  | 0.0007<br>48501 | 0.02410<br>1225 | TRIM48 ZNFX1<br>SAMHD1                                                                                                                           |
| Transcriptio<br>nal<br>misregulatio<br>n in cancer                                    | KEGG | 6   | 176   | 0.0007<br>59148 | 0.02435<br>8863 | FCGR1A ETV7 PML<br>BCL2A1 BIRC3 IL6<br>ISG15 IFITM1 OASL<br>CMPK2 HERC6<br>CXCL11 MX1 DDX60<br>IFI35 CXCL10 OAS3<br>SOCS1 STAT1 IFI44L           |
| cellular_co<br>mponent                                                                | GO   | 149 | 17527 | 0.0007<br>68571 | 0.02453<br>2999 | RTP4 IFI6 PLSCR1<br>TAP2 HERC5 PPA1                                                                                                              |

MDK OAS2 UBE2L6  
TRIM69 IFIT3 B2M  
SLC15A3 RSAD2  
HLA-G PSMB9 IFI44  
FCGR1A LAMP3  
IFI27 IFI30 CXCL9  
SP110 DDX58  
PARP12 OAS1 ISG20  
WARS RNF19B IRF9  
TDRD7 TAP1 IFI27L1  
CENPW NMI IFIT1  
TRIM22 DYNLT1  
KIR2DL3 OR4C15  
IFI16 IFIT2 TYMP  
ETV7 SP100 PML  
BCL2A1 LILRA2 TTF2  
IFIH1 ZFP36 RPL39L  
MSRA RNF213  
BIRC3 NFKBIE HLA-  
C KPNA2 NCAPG  
SAMD9L UQCRHL  
NT5C3A MRPS18C  
LCMT1 GBP1 SAMD9  
GBP4 ATP6V1F  
TRIM31 PGP  
UNC93B1 RAB32  
TYROBP SRGN  
APOL6 EGR2 CCNE1  
LAIR2 PRTN3 IDO1  
TLR3 XAF1 ORAI2  
MELK XCL2 RGS1  
SYNGR2 HELZ2  
CD58 CD83 TRIM48  
TREM2 SMIM13  
EIF2AK2 RARRES3  
CCL4 VAMP5 HLA-F  
ZNFX1 IL6 LGALS9  
HLA-E CHRNA3 MX2  
CASP1 PSMG2  
AMBRA1 OR2B6  
KIR2DL2 UBD  
CLEC4E TNFSF4  
HLA-A GNA15 JUNB  
SPRR2A CCL20  
CCL3L3 DSN1  
SHISA5 KLRD1  
RGS10 HCST  
TESPA1 SYT4  
SAMHD1 OR4C45  
BOLA3 ZNF831 ECT2

|                                             |    |    |      |                 |                 |                                                                                                                                                                                                                                            |
|---------------------------------------------|----|----|------|-----------------|-----------------|--------------------------------------------------------------------------------------------------------------------------------------------------------------------------------------------------------------------------------------------|
|                                             |    |    |      |                 |                 | OR52E8 RASSF3<br>CSH1 GBP2 SVBP                                                                                                                                                                                                            |
| positive regulation of homeostatic process  | GO | 7  | 245  | 0.0007<br>85636 | 0.02499<br>1091 | ISG15 CXCL11<br>CXCL10 STAT1<br>CXCL9 PML LGALS9<br>MX1 TAP2 TAP1<br>TTF2 RNF213 GBP1<br>GBP4 ATP6V1F                                                                                                                                      |
| ribonucleoside catabolic process            | GO | 12 | 661  | 0.0008<br>02246 | 0.02543<br>1616 | RAB32 MX2 GNA15<br>GBP2<br>MX1 STAT1 HERC5<br>OAS2 LAMP3<br>NFKBIE GBP4                                                                                                                                                                    |
| perinuclear region of cytoplasm             | GO | 12 | 661  | 0.0008<br>02246 | 0.02543<br>1616 | EIF2AK2 VAMP5<br>AMBRA1 SYT4 GBP2<br>CXCL10 PLSCR1<br>B2M RSAD2 DYNLT1<br>TYROBP PRTN3<br>TLR3 CD58 IL6 HLA-E<br>UBD CLEC4E                                                                                                                |
| cell activation                             | GO | 16 | 1049 | 0.0008<br>04697 | 0.02546<br>5481 | TNFSF4 GNA15<br>DSN1<br>DDX58 TLR3 CD58<br>IL6 LGALS9 HLA-E                                                                                                                                                                                |
| positive regulation of protein transport    | GO | 10 | 484  | 0.0008<br>14128 | 0.02567<br>5693 | CASP1 CLEC4E<br>TNFSF4 ECT2<br>CXCL10 STAT1 B2M<br>HLA-G DYNLT1                                                                                                                                                                            |
| negative regulation of cell differentiation | GO | 12 | 663  | 0.0008<br>22557 | 0.02589<br>7181 | ZFP36 GBP1 TLR3<br>PRAMEF1 IL6<br>TNFSF4 SYT4<br>CMPK2 MX1 PLSCR1<br>TAP2 PPA1 OAS2<br>PSMB9 OAS1 TAP1<br>TYMP PML TTF2<br>ZFP36 RNF213<br>UQCRHL NT5C3A<br>GBP1 GBP4<br>ATP6V1F PGP<br>RAB32 CCNE1 TLR3<br>MELK EIF2AK2<br>RARRES3 LGALS9 |
| phosphorus metabolic process                | GO | 32 | 2739 | 0.0008<br>3905  | 0.02637<br>1364 | MX2 GNA15 HCST<br>SAMHD1 GBP2<br>ISG15 CXCL11<br>CXCL10 OAS3<br>PLSCR1 TAP2 PPA1<br>MDK B2M PSMB9                                                                                                                                          |
| extracellular region                        | GO | 47 | 4559 | 0.0008<br>67403 | 0.02703<br>1861 | IFI30 CXCL9 OAS1<br>WARS TAP1 IFIT1                                                                                                                                                                                                        |

|                                                        |    |    |      |                 |                 |                                                                                                                                                                                                                                                                                                                                                                                                                                                                                                                                                                                                                                                                                                                                                                                                                                                                                         |
|--------------------------------------------------------|----|----|------|-----------------|-----------------|-----------------------------------------------------------------------------------------------------------------------------------------------------------------------------------------------------------------------------------------------------------------------------------------------------------------------------------------------------------------------------------------------------------------------------------------------------------------------------------------------------------------------------------------------------------------------------------------------------------------------------------------------------------------------------------------------------------------------------------------------------------------------------------------------------------------------------------------------------------------------------------------|
|                                                        |    |    |      |                 |                 | DYNLT1 LILRA2<br>MSRA HLA-C GBP1<br>ATP6V1F SRGN<br>APOL6 LAIR2 PRTN3<br>XCL2 SYNGR2 CD58<br>TREM2 CCL4 VAMP5<br>IL6 LGALS9 HLA-E<br>CASP1 TNFSF4 HLA-<br>A CCL20 CCL3L3<br>DSN1 SHISA5 SYT4<br>BOLA3 CSH1 GBP2<br>SVBP<br>ISG15 HERC6 MX1<br>TAP2 HERC5 OAS2<br>UBE2L6 PSMB9<br>ISG20 RNF19B TAP1<br>TYMP PML TTF2<br>ZFP36 RNF213<br>NT5C3A GBP1 GBP4<br>ATP6V1F RAB32<br>IDO1 RARRES3 MX2<br>UBD GNA15<br>SAMHD1 GBP2<br>ISG15 CXCL10<br>SOCS1 HERC5<br>PSMB9 WARS NMI<br>PML BIRC3 LCMT1<br>GBP1 CCNE1 TLR3<br>XCL2 TREM2<br>EIF2AK2 CCL4 IL6<br>LGALS9 CHRNA3<br>PSMG2 CCL20<br>CCL3L3 ECT2 SVBP<br>SOCS1 HLA-G CD83<br>IL6 LGALS9 HLA-E<br>TNFSF4 HLA-A<br>TESPA1<br>MX1 TAP2 TAP1<br>TYMP TTF2 RNF213<br>NT5C3A GBP1 GBP4<br>ATP6V1F RAB32<br>IDO1 MX2 GNA15<br>SAMHD1 GBP2<br>CXCL11 CXCL10<br>PSMB9 CXCL9 TYMP<br>TYROBP EGR2 XCL2<br>TREM2 CCL4 IL6<br>LGALS9 CCL20<br>CCL3L3 |
| organic<br>substance<br>catabolic<br>process           | GO | 28 | 2333 | 0.0008<br>79328 | 0.02731<br>1056 |                                                                                                                                                                                                                                                                                                                                                                                                                                                                                                                                                                                                                                                                                                                                                                                                                                                                                         |
| regulation of<br>protein<br>modification<br>process    | GO | 25 | 1973 | 0.0008<br>79246 | 0.02731<br>1056 |                                                                                                                                                                                                                                                                                                                                                                                                                                                                                                                                                                                                                                                                                                                                                                                                                                                                                         |
| positive<br>regulation of<br>cell<br>adhesion          | GO | 9  | 405  | 0.0008<br>81876 | 0.02734<br>4085 |                                                                                                                                                                                                                                                                                                                                                                                                                                                                                                                                                                                                                                                                                                                                                                                                                                                                                         |
| organonitro<br>gen<br>compound<br>catabolic<br>process | GO | 16 | 1061 | 0.0009<br>01215 | 0.02747<br>3553 |                                                                                                                                                                                                                                                                                                                                                                                                                                                                                                                                                                                                                                                                                                                                                                                                                                                                                         |
| taxis                                                  | GO | 14 | 860  | 0.0008<br>89378 | 0.02747<br>3553 |                                                                                                                                                                                                                                                                                                                                                                                                                                                                                                                                                                                                                                                                                                                                                                                                                                                                                         |



|                                                                      |    |    |     |                 |                 |                                                                                                                             |
|----------------------------------------------------------------------|----|----|-----|-----------------|-----------------|-----------------------------------------------------------------------------------------------------------------------------|
| ribonucleotide catabolic process                                     | GO | 12 | 670 | 0.0008<br>9704  | 0.02747<br>3553 | MX1 TAP2 TAP1<br>TTF2 RNF213 GBP1<br>GBP4 ATP6V1F<br>RAB32 MX2 GNA15<br>GBP2<br>TAP2 TAP1 SAMD9L                            |
| vesicle organization                                                 | GO | 8  | 326 | 0.0008<br>99122 | 0.02747<br>3553 | SAMD9 RAB32<br>SRGN VAMP5 SYT4                                                                                              |
| positive regulation of peptide secretion                             | GO | 7  | 251 | 0.0009<br>0011  | 0.02747<br>3553 | CD58 IL6 LGALS9<br>HLA-E CASP1<br>CLEC4E TNFSF4                                                                             |
| regulation of protein import into nucleus                            | GO | 6  | 182 | 0.0008<br>97399 | 0.02747<br>3553 | DDX58 NFKBIE TLR3<br>IL6 LGALS9 ECT2<br>MX1 TAP2 TAP1<br>TYMP TTF2 RNF213<br>UQCRHL NT5C3A<br>GBP1 GBP4                     |
| nucleoside metabolic process                                         | GO | 15 | 967 | 0.0009<br>64433 | 0.02883<br>5908 | ATP6V1F RAB32<br>MX2 GNA15 GBP2<br>SOCS1 HLA-G PML<br>GBP1 IDO1 CD83 IL6<br>LGALS9 HLA-E                                    |
| regulation of cell adhesion                                          | GO | 12 | 677 | 0.0009<br>77034 | 0.02916<br>5339 | TNFSF4 HLA-A<br>TESPA1<br>B2M HLA-G FCGR1A                                                                                  |
| endosome membrane positive regulation of nucleocytoplasmic transport | GO | 9  | 414 | 0.0010<br>22522 | 0.03022<br>922  | PML HLA-C TLR3<br>HLA-F HLA-E HLA-A                                                                                         |
| protein ubiquitination                                               | GO | 12 | 684 | 0.0010<br>62848 | 0.03127<br>0812 | DDX58 TLR3 IL6<br>LGALS9 ECT2<br>HERC6 SOCS1<br>HERC5 UBE2L6<br>TRIM69 PSMB9<br>RNF19B TRIM22<br>RNF213 BIRC3<br>TRIM31 UBD |
| regulation of protein import                                         | GO | 6  | 189 | 0.0010<br>82267 | 0.03179<br>1374 | DDX58 NFKBIE TLR3<br>IL6 LGALS9 ECT2<br>PSMB9 FCGR1A<br>DDX58 IFI16 IFIH1<br>BIRC3 UNC93B1                                  |
| activation of immune response                                        | GO | 10 | 504 | 0.0010<br>92068 | 0.03202<br>8186 | TLR3 LGALS9<br>CLEC4E                                                                                                       |
| cellular response to                                                 | GO | 13 | 785 | 0.0011<br>31582 | 0.03297<br>702  | SOCS1 STAT1<br>PSMB9 IFIT1                                                                                                  |

|                                                 |    |    |      |                 |                 |                                                                                                                                                                                                       |
|-------------------------------------------------|----|----|------|-----------------|-----------------|-------------------------------------------------------------------------------------------------------------------------------------------------------------------------------------------------------|
| nitrogen compound                               |    |    |      |                 |                 | ATP6V1F TLR3<br>TREM2 IL6 CHRNA3<br>TNFSF4 GNA15<br>RGS10 CSH1<br>HLA-G TAP1 HLA-C                                                                                                                    |
| peptide binding                                 | GO | 7  | 263  | 0.0011<br>6816  | 0.03382<br>8872 | KPNA2 HLA-F HLA-E<br>HLA-A<br>CMPK2 MX1 IFI6<br>OAS2 IFIT3 RSAD2<br>IFI27 OAS1 TDRD7<br>TAP1 BCL2A1 MSRA<br>UQCRHL NT5C3A<br>MRPS18C TRIM31<br>RAB32 XAF1 MX2                                         |
| mitochondrion                                   | GO | 22 | 1712 | 0.0011<br>94963 | 0.03455<br>0737 | CASP1 AMBRA1<br>BOLA3<br>PLSCR1 TAP2 B2M<br>SLC15A3 RSAD2<br>HLA-G FCGR1A<br>LAMP3 IFI27 DDX58<br>TAP1 PML BCL2A1<br>BIRC3 HLA-C<br>ATP6V1F RAB32<br>TYROBP TLR3<br>SYNGR2 CD58 HLA-F<br>HLA-E CHRNA3 |
| whole membrane                                  | GO | 27 | 2266 | 0.0012<br>00466 | 0.03465<br>5447 | AMBRA1 HLA-A<br>SYT4<br>B2M HLA-G FCGR1A                                                                                                                                                              |
| coated vesicle                                  | GO | 7  | 265  | 0.0012<br>18321 | 0.03506<br>0988 | HLA-C HLA-F HLA-E<br>HLA-A                                                                                                                                                                            |
| guanosine-containing compound catabolic process | GO | 7  | 265  | 0.0012<br>18321 | 0.03506<br>0988 | MX1 GBP1 GBP4<br>RAB32 MX2 GNA15<br>GBP2<br>MX1 TAP2 TAP1<br>TYMP TTF2 RNF213<br>UQCRHL NT5C3A<br>GBP1 GBP4                                                                                           |
| glycosyl compound metabolic process             | GO | 15 | 992  | 0.0012<br>26961 | 0.03525<br>4557 | ATP6V1F RAB32<br>MX2 GNA15 GBP2<br>MX1 TAP2 TAP1<br>TTF2 RNF213 GBP1<br>GBP4 ATP6V1F                                                                                                                  |
| organophosphate catabolic process               | GO | 13 | 793  | 0.0012<br>34214 | 0.03540<br>7704 | RAB32 MX2 GNA15<br>SAMHD1 GBP2<br>ISG15 HERC6 MX1<br>TAP2 HERC5 OAS2                                                                                                                                  |
| cellular catabolic process                      | GO | 29 | 2505 | 0.0012<br>90165 | 0.03694<br>0719 | UBE2L6 PSMB9<br>ISG20 RNF19B TAP1                                                                                                                                                                     |

|                                                                             |    |    |      |                 |                 |                                                                                                                                                                                                                                                                  |
|-----------------------------------------------------------------------------|----|----|------|-----------------|-----------------|------------------------------------------------------------------------------------------------------------------------------------------------------------------------------------------------------------------------------------------------------------------|
|                                                                             |    |    |      |                 |                 | IFI16 TYMP PML<br>TTF2 ZFP36 RNF213<br>NT5C3A GBP1 GBP4<br>ATP6V1F RAB32<br>IDO1 MX2 AMBRA1<br>UBD GNA15<br>SAMHD1 GBP2                                                                                                                                          |
| regulation of<br>myeloid cell<br>differentiation                            | GO | 6  | 196  | 0.0012<br>94945 | 0.03694<br>0719 | ISG15 STAT1 B2M<br>ZFP36 TYROBP<br>TLR3                                                                                                                                                                                                                          |
| myeloid cell<br>differentiation                                             | GO | 6  | 197  | 0.0013<br>27751 | 0.03768<br>0291 | IFI16 PML PRTN3<br>LGALS9 UBD JUNB<br>CXCL10 STAT1<br>PLSCR1 MDK<br>PSMB9 LAMP3 IFI27<br>DDX58 WARS<br>RNF19B NMI TRIM22<br>IFI16 SP100 PML<br>ZFP36 BIRC3<br>TRIM31 EGR2<br>CCNE1 TLR3 XCL2<br>HELZ2 TREM2<br>EIF2AK2 CCL4 IL6<br>LGALS9 CHRNA3<br>CASP1 TNFSF4 |
| positive<br>regulation of<br>macromolecule<br>metabolic<br>process          | GO | 35 | 3220 | 0.0013<br>48446 | 0.03820<br>8733 | JUNB CCL20 CCL3L3<br>ECT2                                                                                                                                                                                                                                        |
| positive<br>regulation of<br>lymphocyte<br>proliferation                    | GO | 5  | 133  | 0.0013<br>56817 | 0.03832<br>8012 | IL6 LGALS9 HLA-E<br>TNFSF4 HLA-A                                                                                                                                                                                                                                 |
| positive<br>regulation of<br>cysteine-<br>type<br>endopeptidase<br>activity | GO | 5  | 133  | 0.0013<br>56817 | 0.03832<br>8012 | IFI27 IFI16 PML<br>LGALS9 CASP1<br>STAT1 PLSCR1 B2M<br>PSMB9 IFI27 DDX58<br>TRIM22 IFI16 SP100<br>PML TRIM31 TLR3<br>XCL2 RGS1 EIF2AK2<br>CCL4 IL6 LGALS9<br>CHRNA3 CASP1<br>AMBRA1 GNA15                                                                        |
| positive<br>regulation of<br>molecular<br>function                          | GO | 26 | 2133 | 0.0013<br>89462 | 0.03913<br>0132 | CCL20 CCL3L3<br>RGS10 ECT2                                                                                                                                                                                                                                       |
| positive<br>regulation of                                                   | GO | 5  | 135  | 0.0014<br>45514 | 0.04019<br>4512 | IL6 LGALS9 HLA-E<br>TNFSF4 HLA-A                                                                                                                                                                                                                                 |

|                                                                |    |    |      |                 |                 |                                                                                                                                                                                 |  |
|----------------------------------------------------------------|----|----|------|-----------------|-----------------|---------------------------------------------------------------------------------------------------------------------------------------------------------------------------------|--|
| mononuclear cell proliferation                                 |    |    |      |                 |                 |                                                                                                                                                                                 |  |
| purine nucleoside catabolic process                            | GO | 7  | 274  | 0.0014<br>6521  | 0.04039<br>8553 | MX1 GBP1 GBP4<br>RAB32 MX2 GNA15<br>GBP2                                                                                                                                        |  |
| purine ribonucleoside catabolic process                        | GO | 7  | 274  | 0.0014<br>6521  | 0.04039<br>8553 | MX1 GBP1 GBP4<br>RAB32 MX2 GNA15<br>GBP2<br>CXCL10 SOCS1<br>HERC5 WARS PML<br>GBP1 CCNE1 TLR3<br>XCL2 TREM2<br>EIF2AK2 CCL4 IL6<br>LGALS9 CHRNA3<br>AMBRA1 CCL20<br>CCL3L3 ECT2 |  |
| regulation of phosphorylation                                  | GO | 19 | 1427 | 0.0014<br>80216 | 0.04075<br>1301 |                                                                                                                                                                                 |  |
| positive regulation of NF-kappaB transcription factor activity | GO | 5  | 136  | 0.0014<br>91424 | 0.04099<br>8587 | TRIM22 TLR3<br>EIF2AK2 IL6 LGALS9<br>SOCS1 STAT1<br>PSMB9 DDX58 NMI<br>IFI16 SP100 PML<br>BCL2A1 IFIH1 ZFP36<br>BIRC3 RAB32<br>TYROBP TLR3 MELK                                 |  |
| intracellular signal transduction                              | GO | 21 | 1623 | 0.0015<br>1093  | 0.04147<br>2885 | LGALS9 CCL20<br>SHISA5 ECT2 CSH1<br>MX1 GBP1 GBP4<br>RAB32 MX2 GNA15<br>GBP2                                                                                                    |  |
| GTPase activity                                                | GO | 7  | 276  | 0.0015<br>25006 | 0.04173<br>4851 |                                                                                                                                                                                 |  |
| positive regulation of protein localization to nucleus         | GO | 5  | 137  | 0.0015<br>38396 | 0.04203<br>885  | DDX58 TLR3 IL6<br>LGALS9 ECT2<br>MX1 TAP2 TAP1<br>TTF2 RNF213<br>UQCRHL NT5C3A<br>GBP1 GBP4                                                                                     |  |
| purine ribonucleoside metabolic process                        | GO | 14 | 917  | 0.0015<br>82614 | 0.04318<br>3083 | ATP6V1F RAB32<br>MX2 GNA15 GBP2<br>MX1 TAP2 TAP1<br>TTF2 RNF213                                                                                                                 |  |
| purine nucleoside metabolic process                            | GO | 14 | 920  | 0.0016<br>28915 | 0.04437<br>6297 | UQCRHL NT5C3A<br>GBP1 GBP4                                                                                                                                                      |  |

|                                                      |    |    |      |                 |                 |                                                                                                                                                                                                                                               |
|------------------------------------------------------|----|----|------|-----------------|-----------------|-----------------------------------------------------------------------------------------------------------------------------------------------------------------------------------------------------------------------------------------------|
| regulation of cell migration                         | GO | 12 | 723  | 0.0016<br>62801 | 0.04510<br>3772 | ATP6V1F RAB32<br>MX2 GNA15 GBP2<br>IFITM1 CXCL11<br>CXCL10 CXCL9<br>DDX58 SP100 XCL2<br>CCL4 IL6 LGALS9<br>CCL20 SVBP                                                                                                                         |
| purine ribonucleoside triphosphate metabolic process | GO | 13 | 824  | 0.0017<br>07575 | 0.04625<br>0167 | MX1 TAP2 TAP1<br>TTF2 RNF213<br>UQCRHL GBP1<br>GBP4 ATP6V1F<br>RAB32 MX2 GNA15<br>GBP2<br>ISG15 CXCL10<br>SOCS1 IFI6 HERC5<br>PSMB9 LAMP3 IFI27<br>WARS RNF19B NMI<br>IFI16 PML ZFP36<br>BIRC3 LCMT1 GBP1<br>CCNE1 TLR3 XCL2<br>TREM2 EIF2AK2 |
| regulation of protein metabolic process              | GO | 32 | 2899 | 0.0017<br>53234 | 0.04734<br>7595 | CCL4 IL6 LGALS9<br>CHRNA3 CASP1<br>PSMG2 CCL20<br>CCL3L3 ECT2 SVBP<br>CXCL10 SOCS1<br>HERC5 WARS PML<br>GBP1 CCNE1 TLR3<br>XCL2 TREM2<br>EIF2AK2 CCL4 IL6<br>LGALS9 CHRNA3<br>CCL20 CCL3L3 ECT2                                               |
| regulation of protein phosphorylation                | GO | 18 | 1334 | 0.0017<br>52488 | 0.04734<br>7595 | CXCL11 CXCL10<br>CXCL9 DDX58 TLR3<br>IL6 LGALS9 ECT2                                                                                                                                                                                          |
| positive regulation of intracellular transport       | GO | 8  | 364  | 0.0017<br>63452 | 0.04744<br>0687 | PSMB9 FCGR1A<br>DDX58 IFIH1 BIRC3<br>UNC93B1 TLR3<br>LGALS9 CLEC4E<br>MX1 PLSCR1 TAP2<br>OAS2 TRIM69 B2M<br>RSAD2 HLA-G<br>FCGR1A LAMP3<br>IFI27 OAS1 TAP1<br>DYNLT1 IFIT2 PML<br>NFKBIE HLA-C<br>KPNA2 SAMD9L                                |
| immune response-activating signal transduction       | GO | 9  | 450  | 0.0017<br>76751 | 0.04756<br>4234 | NT5C3A GBP1<br>SAMD9 GBP4                                                                                                                                                                                                                     |
| endomembrane system                                  | GO | 43 | 4267 | 0.0018<br>06778 | 0.04829<br>7889 |                                                                                                                                                                                                                                               |

|                                                              |    |    |      |                 |                 |                                                                                                                                                                                                                               |
|--------------------------------------------------------------|----|----|------|-----------------|-----------------|-------------------------------------------------------------------------------------------------------------------------------------------------------------------------------------------------------------------------------|
|                                                              |    |    |      |                 |                 | UNC93B1 RAB32<br>TYROBP SRGN<br>PRTN3 TLR3<br>SYNGR2 CD58<br>VAMP5 HLA-F HLA-E<br>MX2 HLA-A DSN1<br>SHISA5 TESPA1<br>SYT4 CSH1 GBP2<br>MX1 TAP2 TAP1<br>TTF2 RNF213<br>UQCRHL GBP1<br>GBP4 ATP6V1F<br>RAB32 MX2 GNA15<br>GBP2 |
| ribonucleoside triphosphate metabolic process                | GO | 13 | 830  | 0.0018<br>14528 | 0.04843<br>4752 |                                                                                                                                                                                                                               |
| positive regulation of establishment of protein localization | GO | 10 | 542  | 0.0018<br>31578 | 0.04881<br>9095 | DDX58 TLR3 CD58<br>IL6 LGALS9 HLA-E<br>CASP1 CLEC4E<br>TNFSF4 ECT2                                                                                                                                                            |
| regulation of cytokine-mediated signaling pathway            | GO | 5  | 143  | 0.0018<br>4334  | 0.04906<br>1616 | SOCS1 STAT1 BIRC3<br>TREM2 IL6<br>CXCL11 CXCL10<br>STAT1 MDK PSMB9<br>LAMP3 CXCL9<br>DYNLT1 TYMP PML<br>TYROBP EGR2 XCL2<br>CD58 TREM2 CCL4<br>IL6 LGALS9 CCL20<br>CCL3L3                                                     |
| locomotion                                                   | GO | 20 | 1516 | 0.0018<br>65367 | 0.04957<br>6231 | MX1 IFI44L GBP1<br>GBP4 RAB32 MX2<br>GNA15 GBP2                                                                                                                                                                               |
| GTP binding                                                  | GO | 8  | 368  | 0.0018<br>83164 | 0.04983<br>3504 |                                                                                                                                                                                                                               |

**Supplementary Table 5. Intrahepatic expression of selected interferon-stimulated genes.**

| Gene         | Intrahepatic Gene Expression Pre-treatment |            |                                         |          | Intrahepatic Gene Expression On-Treatment |            |                                        |             |
|--------------|--------------------------------------------|------------|-----------------------------------------|----------|-------------------------------------------|------------|----------------------------------------|-------------|
|              | Virological Break-through                  | Responders | Responders vs. Virological Breakthrough |          | Virological Break-through                 | Responders | Responders vs Virological Breakthrough |             |
|              | [Mean]                                     | [Mean]     | Fold change                             | P-value  | [Mean]                                    | [Mean]     | Fold change                            | P-value     |
| <i>DDX60</i> | 6.733                                      | 8.304      | -2.971                                  | 2.56E-06 | 5.938                                     | 6.316      | -1.299                                 | <i>n.s.</i> |
| <i>IFIT1</i> | 7.135                                      | 8.776      | -3.118                                  | 2.08E-04 | 7.049                                     | 6.908      | 1.102                                  | <i>n.s.</i> |
| <i>IRF9</i>  | 7.380                                      | 8.082      | -1.627                                  | 2.08E-04 | 7.095                                     | 7.251      | -1.115                                 | <i>n.s.</i> |
| <i>ISG15</i> | 11.059                                     | 12.043     | -1.978                                  | 2.05E-03 | 9.665                                     | 9.650      | 1.011                                  | <i>n.s.</i> |
| <i>MX1</i>   | 6.777                                      | 8.250      | -2.775                                  | 3.15E-03 | 5.766                                     | 6.031      | -1.201                                 | <i>n.s.</i> |
| <i>OASL</i>  | 7.629                                      | 8.899      | -2.410                                  | 4.14E-04 | 6.196                                     | 6.288      | -1.066                                 | <i>n.s.</i> |
| <i>SOCS1</i> | 5.019                                      | 4.943      | 1.054                                   | 2.43E-03 | 4.491                                     | 4.354      | 1.100                                  | <i>n.s.</i> |
| <i>USP18</i> | 6.193                                      | 7.320      | -2.183                                  | 6.50E-01 | 6.199                                     | 6.455      | -1.194                                 | <i>n.s.</i> |

**Supplementary Table 6: Comparison of Microarray and Nanostring Gene Expression Data for the Top 46 Differentially Expressed Genes. (Ordered alphabetically)**

| Symbol  | Gene                                             | Microarray Fold Change | Microarray p value | Nanostring Fold Change | Nanostring p value |
|---------|--------------------------------------------------|------------------------|--------------------|------------------------|--------------------|
| ACADSB  | acyl-CoA dehydrogenase, short/branched chain     | 1.61                   | 0.010517603        | 1.38                   | 0.015613674        |
| ACSM3   | acyl-CoA synthetase medium-chain family member 3 | 2.06                   | 0.008354682        | 1.70                   | 0.000993563        |
| ADH6    | alcohol dehydrogenase 6 (class V)                | 1.70                   | 0.086923493        | 1.23                   | 0.089305591        |
| ANXA9   | annexin A9                                       | 1.64                   | 0.008744376        | 1.36                   | 0.003836942        |
| APOA5   | apolipoprotein A5                                | 1.62                   | 0.010371417        | 1.44                   | 0.031966952        |
| APOF    | apolipoprotein F                                 | 1.78                   | 0.07270472         | 1.47                   | 0.062457893        |
| BDH1    | 3-hydroxybutyrate dehydrogenase, type 1          | 1.51                   | 0.026923968        | 1.18                   | 0.261421616        |
| CCL19   | C-C motif chemokine ligand 19                    | -1.73                  | 0.171879896        | -2.60                  | 0.022930136        |
| CCL2    | C-C motif chemokine ligand 2                     | -2.04                  | 0.01985917         | -1.61                  | 0.035687669        |
| CCL20   | C-C motif chemokine ligand 20                    | -1.55                  | 0.006998927        | -2.67                  | 0.00109496         |
| CCL4    | C-C motif chemokine ligand 4                     | -1.70                  | 0.005183547        | -1.74                  | 0.001116588        |
| CXCL10  | C-X-C motif chemokine ligand 10                  | -4.78                  | 5.87E-06           | -9.69                  | 2.43E-13           |
| CXCL11  | C-X-C motif chemokine ligand 11                  | -2.79                  | 1.83E-06           | -5.84                  | 1.24E-11           |
| CXCL9   | C-X-C motif chemokine ligand 9                   | -2.50                  | 0.000202519        | -2.79                  | 3.74E-05           |
| CYP1A1  | cytochrome P450 family 1 subfamily A member 1    | 2.10                   | 0.029537442        | 1.63                   | 0.027485863        |
| CYP4A11 | cytochrome P450 family 4 subfamily A member 11   | 1.53                   | 0.068067419        | 1.38                   | 0.12237672         |
| DDX58   | DEXD/H-box helicase 58                           | -1.76                  | 0.000223119        | -2.08                  | 2.86E-05           |



|         |                                                             |       |             |        |             |
|---------|-------------------------------------------------------------|-------|-------------|--------|-------------|
| DDX60   | DEXD/H-box helicase 60                                      | -2.94 | 3.42E-06    | -4.29  | 1.21E-10    |
| EIF2AK2 | eukaryotic translation initiation factor 2 alpha kinase 2   | -1.55 | 0.00499379  | -2.03  | 2.13E-05    |
| FDPS    | farnesyl diphosphate synthase                               | 1.53  | 0.003559337 | 1.56   | 0.020802651 |
| HMGCS2  | 3-hydroxy-3-methylglutaryl-CoA synthase 2                   | 1.53  | 0.118530254 | 1.18   | 0.146653988 |
| IFI27   | interferon alpha inducible protein 27                       | -1.90 | 0.000188962 | -6.45  | 1.59E-09    |
| IFI44L  | interferon induced protein 44 like                          | -3.87 | 1.40E-05    | -6.33  | 2.69E-08    |
| IFI6    | interferon alpha inducible protein 6                        | -4.38 | 3.80E-05    | -11.59 | 7.92E-09    |
| IFIH1   | interferon induced with helicase C domain 1                 | -1.87 | 0.001297286 | -2.07  | 1.16E-05    |
| IFIT1   | interferon induced protein with tetratricopeptide repeats 1 | -2.33 | 0.000741899 | -4.16  | 3.42E-07    |
| IFIT2   | interferon induced protein with tetratricopeptide repeats 2 | -1.93 | 0.000881979 | -2.53  | 0.000168674 |
| IFIT3   | interferon induced protein with tetratricopeptide repeats 3 | -2.41 | 8.95E-05    | -3.29  | 2.98E-07    |
| IFITM1  | interferon induced transmembrane protein 1                  | -1.79 | 3.60E-08    | -3.25  | 1.95E-08    |
| IRF9    | interferon regulatory factor 9                              | -1.55 | 0.000412971 | -2.09  | 3.89E-06    |
| ISG15   | ISG15 ubiquitin-like modifier                               | -4.08 | 3.57E-09    | -12.48 | 3.48E-12    |
| ISG20   | interferon stimulated exonuclease gene 20                   | -1.59 | 0.000342715 | -2.14  | 0.001040931 |
| LCAT    | lecithin-cholesterol acyltransferase                        | 1.54  | 0.048001038 | 1.17   | 0.193625174 |
| LIPC    | lipase C, hepatic type                                      | 1.83  | 0.006127694 | 1.69   | 0.001860569 |
| LSS     | lanosterol synthase (2,3-oxidosqualene-lanosterol cyclase)  | 1.56  | 0.005323788 | 1.52   | 0.017610406 |
| MX1     | MX dynamin like GTPase 1                                    | -3.43 | 2.62E-06    | -6.46  | 1.00E-07    |

|        |                                                           |       |             |        |             |
|--------|-----------------------------------------------------------|-------|-------------|--------|-------------|
| NPC1L1 | NPC1 like intracellular cholesterol transporter 1         | 1.50  | 0.25345488  | 1.10   | 0.70849187  |
| OAS1   | 2'-5'-oligoadenylate synthetase 1                         | -2.12 | 0.000276514 | -2.95  | 1.86E-08    |
| OAS2   | 2'-5'-oligoadenylate synthetase 2                         | -2.85 | 7.98E-05    | -5.18  | 2.42E-09    |
| OAS3   | 2'-5'-oligoadenylate synthetase 3                         | -2.86 | 9.71E-06    | -5.34  | 9.93E-09    |
| OASL   | 2'-5'-oligoadenylate synthetase like                      | -4.54 | 6.29E-08    | -11.43 | 8.12E-14    |
| PLSCR1 | phospholipid scramblase 1                                 | -1.59 | 3.84E-05    | -2.12  | 4.02E-07    |
| PPARA  | peroxisome proliferator activated receptor alpha          | 1.56  | 0.002068441 | 1.27   | 0.068290148 |
| PRKAB2 | protein kinase AMP-activated non-catalytic subunit beta 2 | 1.53  | 0.014931816 | 1.29   | 0.11108575  |
| RSAD2  | radical S-adenosyl methionine domain containing 2         | -2.53 | 0.000130468 | -6.18  | 3.24E-07    |
| STAT1  | signal transducer and activator of transcription 1        | -2.21 | 1.33E-05    | -3.48  | 2.39E-09    |
| TAP1   | transporter 1, ATP binding cassette subfamily B member    | -1.51 | 0.00056765  | -2.13  | 1.07E-05    |

**Supplementary Table 7: List of Genes at baseline with significantly different expression from microarray analysis among the 408 differentially expressed genes between patients who responded compared to those who experienced virological breakthrough to DAA therapy**

| Symbol  | Gene                                                                       | Fold Change | P value     |
|---------|----------------------------------------------------------------------------|-------------|-------------|
| IFI6    | interferon alpha inducible protein 6                                       | 3.7555      | 0.001955355 |
| OAS2    | 2'-5'-oligoadenylate synthetase 2                                          | 3.4108      | 5.36E-05    |
| IFIT1   | interferon induced protein with tetratricopeptide repeats 1                | 3.1177      | 0.000208439 |
| DDX60   | DEXD/H-box helicase 60                                                     | 2.9706      | 2.56E-06    |
| IFI44   | interferon induced protein 44                                              | 2.9165      | 0.000185033 |
| RSAD2   | radical S-adenosyl methionine domain containing 2                          | 2.8506      | 0.000340034 |
| IFI44L  | interferon induced protein 44 like                                         | 2.8218      | 0.005452927 |
| IFIT3   | interferon induced protein with tetratricopeptide repeats 3                | 2.7850      | 8.24E-05    |
| MX1     | MX dynamin like GTPase 1                                                   | 2.7750      | 0.000413833 |
| OAS3    | 2'-5'-oligoadenylate synthetase 3                                          | 2.7683      | 9.56E-05    |
| HERC5   | HECT and RLD domain containing E3 ubiquitin protein ligase 5               | 2.7376      | 0.000280182 |
| XAF1    | XIAP associated factor 1                                                   | 2.6577      | 0.000491027 |
| IFIH1   | interferon induced with helicase C domain 1                                | 2.6039      | 4.87E-05    |
| OAS1    | 2'-5'-oligoadenylate synthetase 1                                          | 2.6009      | 8.14E-05    |
| SAMD9   | sterile alpha motif domain containing 9                                    | 2.5377      | 0.000862135 |
| CMPK2   | cytidine/uridine monophosphate kinase 2                                    | 2.4938      | 5.17E-05    |
| IFIT2   | interferon induced protein with tetratricopeptide repeats 2                | 2.4600      | 0.000242268 |
| OASL    | 2'-5'-oligoadenylate synthetase like                                       | 2.4099      | 0.002430076 |
| RTP4    | receptor transporter protein 4                                             | 2.3386      | 9.60E-05    |
| HERC6   | HECT and RLD domain containing E3 ubiquitin protein ligase family member 6 | 2.3298      | 0.000335654 |
| HCG26   | HLA complex group 26 (non-protein coding)                                  | 2.2504      | 0.000619202 |
| STAT1   | signal transducer and activator of transcription 1                         | 2.2296      | 6.04E-05    |
| SORD    | sorbitol dehydrogenase                                                     | 2.1688      | 0.004258155 |
| LAMP3   | lysosomal associated membrane protein 3                                    | 2.1443      | 0.003479271 |
| EPSTI1  | epithelial stromal interaction 1 (breast)                                  | 2.1088      | 0.001113814 |
| CXCL11  | C-X-C motif chemokine ligand 11                                            | 2.1060      | 0.002126124 |
| HCP5    | HLA complex P5 (non-protein coding)                                        | 2.0959      | 0.000102935 |
| CCL20   | C-C motif chemokine ligand 20                                              | 2.0338      | 0.00111211  |
| IFI27   | interferon alpha inducible protein 27                                      | 2.0313      | 0.000768875 |
| EIF2AK2 | eukaryotic translation initiation factor 2 alpha kinase 2                  | 2.0112      | 0.000705207 |

|           |                                                                |        |             |
|-----------|----------------------------------------------------------------|--------|-------------|
| SAMD9L    | sterile alpha motif domain containing 9 like                   | 2.0060 | 0.000720888 |
| DDX58     | DEXD/H-box helicase 58                                         | 1.9803 | 0.000187144 |
| ISG15     | ISG15 ubiquitin-like modifier                                  | 1.9784 | 0.003150921 |
| GBP1      | guanylate binding protein 1                                    | 1.8665 | 7.50E-05    |
| TRIM31    | tripartite motif containing 31                                 | 1.8628 | 0.000295083 |
| NRIR      | negative regulator of interferon response (non-protein coding) | 1.8561 | 0.000924068 |
| PARP12    | poly(ADP-ribose) polymerase family member 12                   | 1.8450 | 3.43E-05    |
| GBP4      | guanylate binding protein 4                                    | 1.8269 | 0.000272787 |
| STAB2     | stabilin 2                                                     | 1.8098 | 0.007966073 |
| ZNFX1     | zinc finger NFX1-type containing 1                             | 1.7527 | 0.002194265 |
| BIRC3     | baculoviral IAP repeat containing 3                            | 1.7452 | 0.007702794 |
| TAP1      | transporter 1, ATP binding cassette subfamily B member         | 1.7292 | 0.000198839 |
| PPARA     | peroxisome proliferator activated receptor alpha               | 1.6750 | 0.008237206 |
| UBE2L6    | ubiquitin conjugating enzyme E2 L6                             | 1.6467 | 0.000986465 |
| TDRD7     | tudor domain containing 7                                      | 1.6373 | 0.000238311 |
| RNF213    | ring finger protein 213                                        | 1.6344 | 3.84E-05    |
| IRF9      | interferon regulatory factor 9                                 | 1.6274 | 0.002048737 |
| HLA-F     | major histocompatibility complex, class I, F                   | 1.5956 | 0.00384766  |
| SLC46A1   | solute carrier family 46 member 1                              | 1.5371 | 0.000788678 |
| SLC15A3   | solute carrier family 15 member 3                              | 1.5335 | 0.000376923 |
| NT5C3A    | 5'-nucleotidase, cytosolic IIIA                                | 1.5202 | 0.00322946  |
| NMI       | N-myc and STAT interactor                                      | 1.5105 | 0.001123907 |
| PLSCR1    | phospholipid scramblase 1                                      | 1.5049 | 0.001238307 |
| ZNF691    | zinc finger protein 691                                        | 1.5045 | 0.002348813 |
| BHLHE40   | basic helix-loop-helix family member e40                       | 1.5022 | 0.004256359 |
| SMAD5-AS1 | SMAD5 antisense RNA 1                                          | 1.5013 | 0.000374862 |
| KPNA2     | karyopherin subunit alpha 2                                    | 1.4860 | 0.004835633 |
| SP110     | SP110 nuclear body protein                                     | 1.4791 | 0.002767034 |
| NDRG2     | NDRG family member 2                                           | 1.4576 | 0.003303144 |
| IFI30     | IFI30, lysosomal thiol reductase                               | 1.4473 | 0.00227512  |
| HLA-E     | major histocompatibility complex, class I, E                   | 1.4178 | 0.00462728  |
| IFI35     | interferon induced protein 35                                  | 1.4171 | 0.00472574  |
| SP100     | SP100 nuclear antigen                                          | 1.4129 | 0.001033798 |
| PSMB9     | proteasome subunit beta 9                                      | 1.3973 | 0.000358828 |
| RNF123    | ring finger protein 123                                        | 1.3914 | 0.005674182 |
| PPIP5K1   | diphosphoinositol pentakisphosphate kinase 1                   | 1.3853 | 0.002705835 |
| PSMB8-AS1 | PSMB8 antisense RNA 1 (head to head)                           | 1.3831 | 0.000430455 |

|              |                                                           |         |             |
|--------------|-----------------------------------------------------------|---------|-------------|
| HLA-L        | major histocompatibility complex, class I, L (pseudogene) | 1.3798  | 0.006529507 |
| KLRD1        | killer cell lectin like receptor D1                       | 1.3760  | 0.00512616  |
| SRPRA        | SRP receptor alpha subunit                                | 1.3685  | 0.005093559 |
| HDAC1        | histone deacetylase 1                                     | 1.3616  | 0.002076623 |
| PLOD1        | procollagen-lysine,2-oxoglutarate 5-dioxygenase 1         | 1.3563  | 0.00125254  |
| IFITM1       | interferon induced transmembrane protein 1                | 1.3519  | 0.005773255 |
| ATXN1        | ataxin 1                                                  | 1.3417  | 0.000867161 |
| AMBRA1       | autophagy and beclin 1 regulator 1                        | 1.3408  | 0.001109054 |
| BCL7A        | BCL tumor suppressor 7A                                   | 1.3134  | 0.008842616 |
| SMIM13       | small integral membrane protein 13                        | 1.3104  | 0.009870538 |
| TAP2         | transporter 2, ATP binding cassette subfamily B member    | 1.2812  | 0.002447243 |
| IQSEC1       | IQ motif and Sec7 domain 1                                | 1.2613  | 0.000840507 |
| B2M          | beta-2-microglobulin                                      | 1.2315  | 0.004438817 |
| PRR29        | proline rich 29                                           | -1.2826 | 0.009919255 |
| ZC2HC1B      | zinc finger C2HC-type containing 1B                       | -1.3524 | 0.006132722 |
| MIR133B      | microRNA 133b                                             | -1.3530 | 0.001263178 |
| BOLA3        | bolA family member 3                                      | -1.3739 | 0.004947095 |
| TRIM48       | tripartite motif containing 48                            | -1.4629 | 0.008582016 |
| LOC105369360 | uncharacterized LOC105369360                              | -1.4768 | 0.008430766 |
| LOC105374780 | uncharacterized LOC105374780                              | -1.5878 | 0.000165173 |

**Supplementary Table 8: List of Top 25 upregulated genes when comparing on-treatment to baseline biopsies**

| <b>Symbol</b> | <b>Gene</b>                                          | <b>Fold Change</b> | <b>P value</b> |
|---------------|------------------------------------------------------|--------------------|----------------|
| TSSK2         | testis specific serine kinase 2                      | 1.346865488        | 2.85E-05       |
| CMTM4         | CKLF like MARVEL transmembrane domain containing 4   | 1.541485445        | 2.86E-05       |
| UNC119B       | unc-119 lipid binding chaperone B                    | 1.390173092        | 3.96E-05       |
| GPC5-AS2      | GPC5 antisense RNA 2                                 | 1.248301794        | 0.000107112    |
| LOC101927942  | uncharacterized LOC101927942                         | 1.633982299        | 0.000147473    |
| IQSEC1        | IQ motif and Sec7 domain 1                           | 1.249858695        | 0.000153783    |
| WBSCR27       | Williams Beuren syndrome chromosome region 27        | 1.2179421          | 0.00018273     |
| FAM149A       | family with sequence similarity 149 member A         | 1.299004526        | 0.000189032    |
| LINC01534     | long intergenic non-protein coding RNA 1534          | 1.378072946        | 0.000192563    |
| ESR1          | estrogen receptor 1                                  | 1.406039973        | 0.000257248    |
| ISM1          | isthmin 1                                            | 1.391467238        | 0.000276503    |
| ARSD          | arylsulfatase D                                      | 1.45719898         | 0.000281214    |
| CDK14         | cyclin dependent kinase 14                           | 1.267986803        | 0.000353517    |
| EEF2          | eukaryotic translation elongation factor 2           | 1.283595477        | 0.000366083    |
| EIF3L         | eukaryotic translation initiation factor 3 subunit L | 1.25129337         | 0.000409995    |
| SLC46A1       | solute carrier family 46 member 1                    | 1.437252517        | 0.000410035    |
| KIF12         | kinesin family member 12                             | 1.592543631        | 0.000425764    |
| ALDH2         | aldehyde dehydrogenase 2 family (mitochondrial)      | 1.301563841        | 0.0004369      |
| HDLBP         | high density lipoprotein binding protein             | 1.204505042        | 0.000466716    |
| EIF4B         | eukaryotic translation initiation factor 4B          | 1.41354455         | 0.000468452    |
| RNASE13       | ribonuclease A family member 13 (inactive)           | 1.309608536        | 0.000491023    |
| SPATA33       | spermatogenesis associated 33                        | 1.326668112        | 0.00053207     |
| CERK          | ceramide kinase                                      | 1.303698557        | 0.000553821    |
| UBE4B         | ubiquitination factor E4B                            | 1.253367072        | 0.000587016    |
| DANCR         | differentiation antagonizing non-protein coding RNA  | 1.350322818        | 0.000717876    |

## **Legend to Supplementary Figures**

### **Supplementary Figure 1: Flowchart indicating methods for identifying differentially expressed genes between on-treatment and baseline liver biopsies.**

Raw files from Affymetrix Human Gene 2.0 array were preprocessed using RMA with quantile normalization in R (Bioconductor oligo package, v.1.34.2). Expression data for technical replicates were averaged for each sample and averages were used for further analysis. Differentially expressed genes were determined by linear mixed models using the Bioconductor limma package (v.3.26.8). Pathway enrichment analyses were performed using the hypergeometric distribution, using several databases (GO, Reactome, KEGG, WikiPathways).

### **Supplementary Figure 2: Similarity plot for gene expression at weeks 2 and 4 in treated subjects**

Expression data for week 2 biopsies are shown in blue and week 4 biopsies are shown in green. The similarity plot for expression data from treated patients shows no separation in global expression between biopsies performed at week 2 or week 4.

### **Supplementary Figure 3: Fold change in expression data by NanoString for seven selected genes comparing pre-treatment to week 2/4 on-treatment biopsies**

The mRNA expression level of 7 genes that represent different components of the intrahepatic immune response was determined by Nanostring analysis. Mean expression levels and p values are shown. Patients who responded to DAA therapy displayed a

greater decline in intrahepatic ISG expression from baseline to on-treatment (week 2/4) compared to those who subsequently experience a virological breakthrough.

**Supplementary Figure 4: Gating strategy to study NK cells by flow cytometry.**

(A) Dot plots from left to right show gating on single cells in FSC area versus FSC height plots, gating on lymphocytes in FSC versus SSC plots, exclusion of EMA<sup>+</sup> dead cells, CD14<sup>+</sup> monocytes and CD19<sup>+</sup> B cells, and gating on CD56<sup>+</sup>CD3<sup>-</sup> negative NK cells.

(B) Dot plots from left to right show gating on CD56<sup>dim</sup> and CD56<sup>bright</sup> NK cell subsets, NK cell degranulation (CD107a expression) after culture with or without K562 cells, and analysis of TRAIL expression. Percentages indicate the frequency of events in the red gate relative to the total number of events in the respective plot.

(C) Fluorescence minus one (FMO, pSTAT1 antibody excluded from the staining panel) and pSTAT1 staining of NK cells. Gating strategy as described in panel A except that cells were stained with anti-CD56-PE, anti-CD3-APC, anti-CD20-PerCP/Cy5.5 and anti-pSTAT1-Alexa488.



Raw files from Affymetrix Human Gene 2.0 array were preprocessed (RMA)

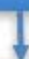

Differentially expressed genes were determined by linear mixed models

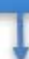

Pathway enrichment analysis was performed using Fisher's Exact Test (GO, Reactome, KEGG, WikiPathways)

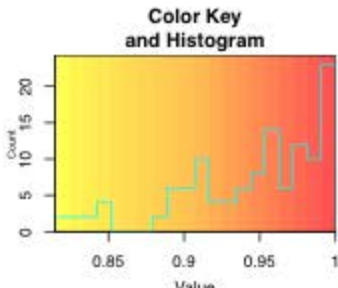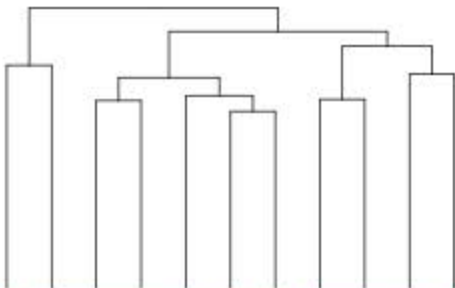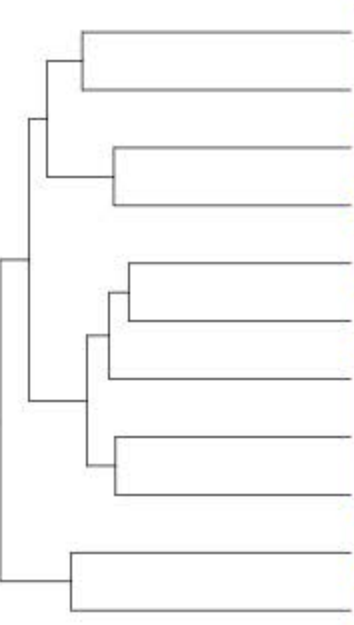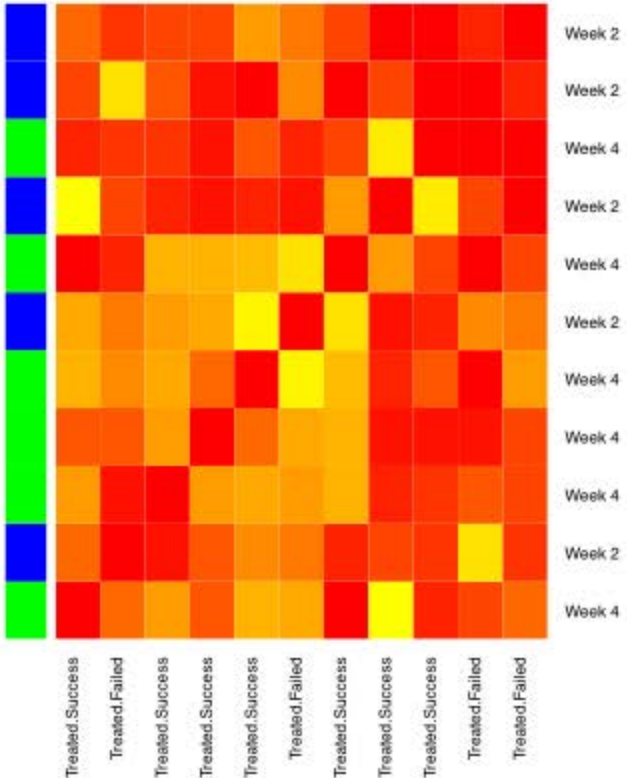

■ Week 2  
■ Week 4

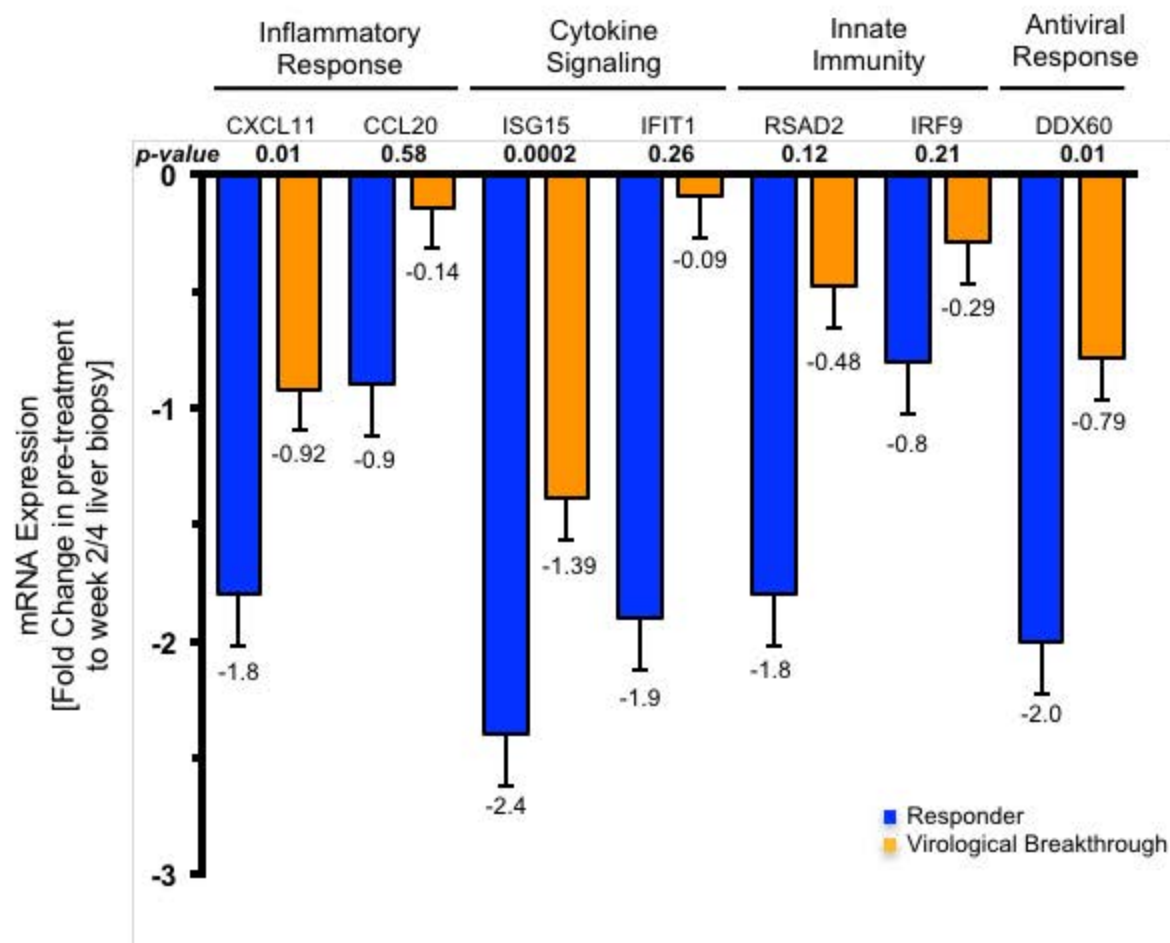

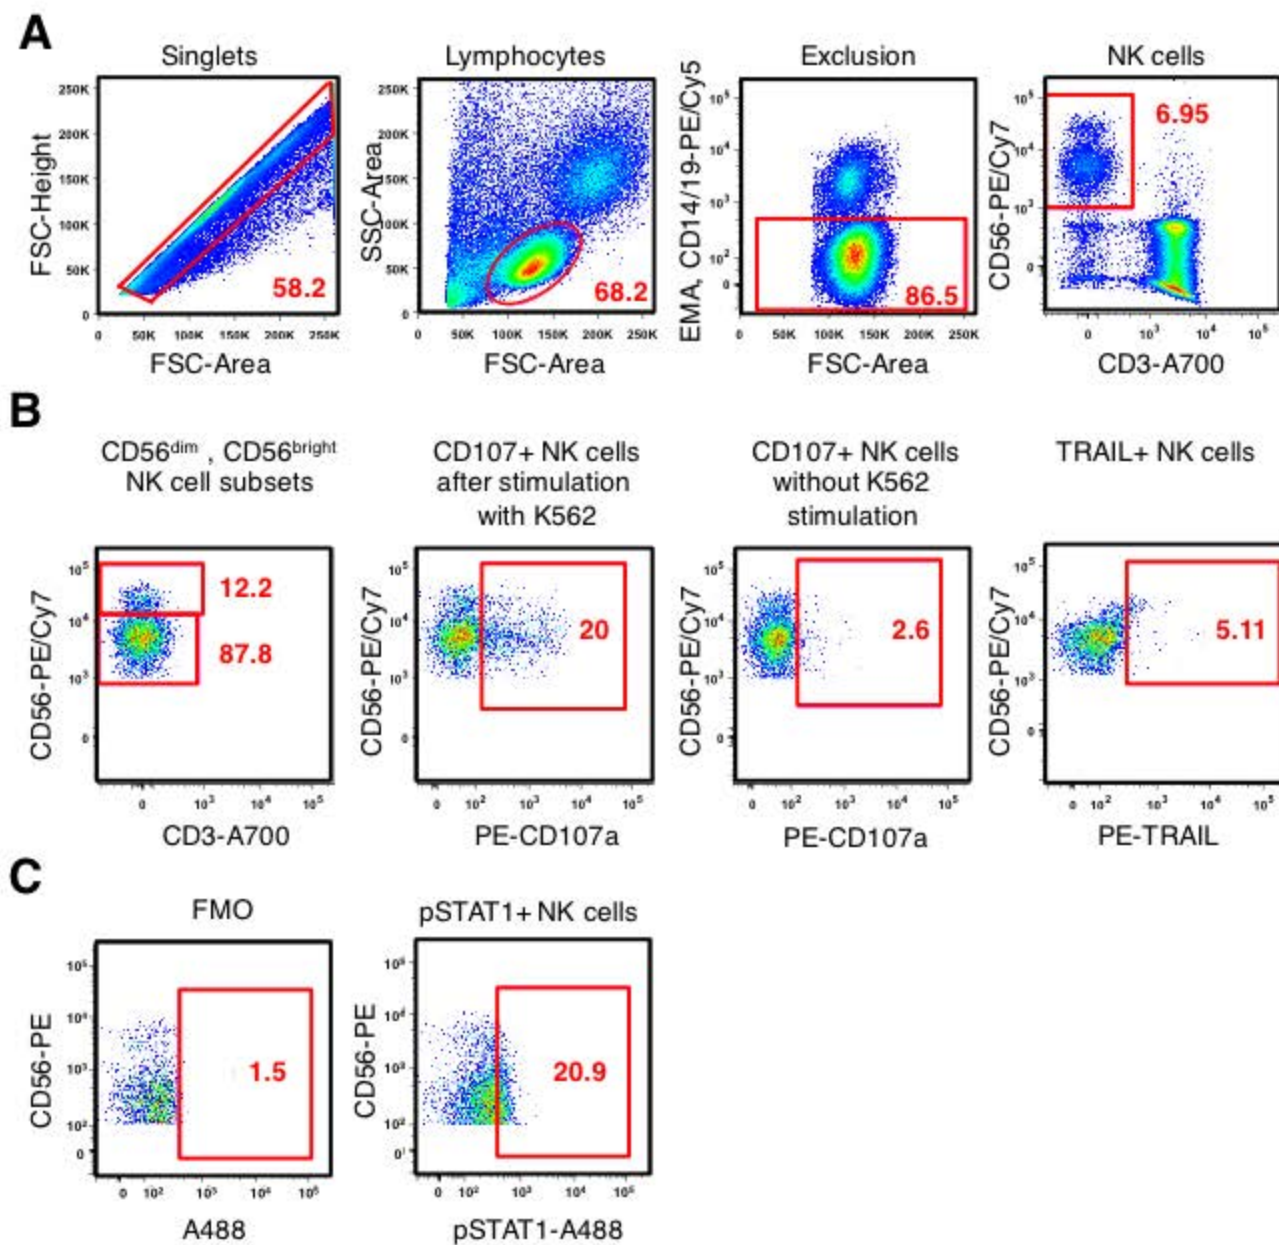

Supplement: NIHMS956641-supplement-Supp_info.pdf [file NIHMS956641-supplement-Supp_info.pdf]
